# Supplementary material for: Aldehyde–alkyne–amine (A3) coupling catalyzed by a highly efficient dicopper complex
Source: Royal Society of Chemistry journal article supplement (doi:10.1039/c5ra04729c), 2015-01-01

Supporting information for

**Aldehyde-Alkyne-Amine (A<sup>3</sup>) Coupling Catalyzed by a Highly Efficient Dicopper Complex**

Hong-Bin Chen,<sup>a\*</sup> Yan Zhao,<sup>a</sup> Yi Liao<sup>b\*</sup>

<sup>a</sup>Department of Chemistry, College of Chemistry and Chemical Engineering, Xiamen University, Xiamen 361005, P. R. China. E-mail: hbchan@xmu.edu.cn

<sup>b</sup>Department of Chemistry, Florida Institute of Technology, Melbourne, FL 32901, USA. E-mail: yliao@fit.edu

**List of contents**

|                                                                    |            |
|--------------------------------------------------------------------|------------|
| <b>I. General methods</b>                                          | <b>S2</b>  |
| <b>II. Experimental procedures and characterization data</b>       | <b>S2</b>  |
| <b>III. Copies of <sup>1</sup>H and <sup>13</sup>C NMR spectra</b> | <b>S13</b> |

## I. General methods

Unless otherwise noted, reagents and solvents were commercially available and used as received without any further purification. Toluene was dried over calcium hydride prior to use. All the  $A^3$ -coupling reactions were performed in flame-dried glassware under nitrogen atmosphere.  $^1\text{H}$  and  $^{13}\text{C}$  NMR spectra were determined in deuterated solvents on a Bruker av400 NMR spectrometer. Chemical shifts were reported in delta ( $\delta$ ) units, parts per million (ppm) downfield from TMS. High resolution mass spectra (HRMS) were recorded on a Bruker Apex ultra 7.0T FT-MS.

## II. Experimental procedure and characterization data

General procedure for  $A^3$ -coupling: To a solution of  $\text{Cu}^{\text{I}}(\text{pip})_2$  (2.0 mg, 0.4% mmol) in toluene (3 mL) was added alkyne (1.2 mmol), aldehyde (1.0 mmol) and amine (1.0 mmol) under nitrogen atmosphere. The reaction mixture was heated at 110 °C for 2 hrs, cooled, and then subjected to column chromatography on silica gel (300-400 mesh) eluting with petroleum ether-ethyl acetate to which give the desired propargylamine.

### 1-(1,3-diphenylprop-2-ynyl)piperidine (Table 2, entry 1)

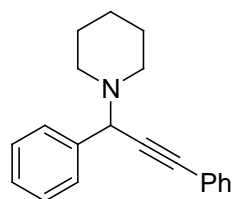

Pale yellow oil, 270 mg, 98%;  $^1\text{H}$  NMR ( $\text{CDCl}_3$ , 400 MHz)  $\delta$  7.69-7.63 (m, 2H), 7.57-7.51 (m, 2H), 7.42-7.29 (m, 6H), 4.83 (s, 1H), 2.59 (t,  $J = 5.14$  Hz, 4H), 1.69-1.53 (m, 4H), 1.51-1.39 (m, 2H);  $^{13}\text{C}$  NMR ( $\text{CDCl}_3$ , 100 MHz)  $\delta$  138.6, 131.9, 128.6, 128.3, 128.1, 127.5, 123.4, 87.9, 86.1, 62.4, 50.7, 26.2, 24.5; HRMS (ESI):  $m/z$  calcd for  $\text{C}_{20}\text{H}_{21}\text{N}$   $[\text{M}+\text{H}]^+$  276.1747, found 276.1748.

### 1-(1-(4-fluorophenyl)-3-phenylprop-2-ynyl)piperidine (Table 2, entry 2)

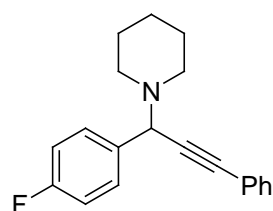

Pale yellow oil, 284 mg, 97%;  $^1\text{H}$  NMR ( $\text{CDCl}_3$ , 400 MHz)  $\delta$  7.66-7.59

(m, 2H), 7.56-7.51 (m, 2H), 7.38-7.31 (m, 3H), 7.09-7.00 (m, 2H), 4.79 (s, 1H), 2.65-2.47 (m, 4H), 1.72-1.51 (m, 4H), 1.50-1.40 (m, 2H);  $^{13}\text{C}$  NMR ( $\text{CDCl}_3$ , 100 MHz)  $\delta$  162.2 (d,  $J_{\text{CF}} = 244.1$  Hz), 134.4 (d,  $J_{\text{CF}} = 3.0$  Hz), 131.8, 130.0 (d,  $J_{\text{CF}} = 8.0$  Hz), 128.3, 128.2, 123.2, 114.8 (d,  $J_{\text{CF}} = 21.2$  Hz), 88.1, 85.7, 61.7, 50.6, 29.7, 26.2, 24.4; HRMS (ESI):  $m/z$  calcd for  $\text{C}_{20}\text{H}_{20}\text{FN}$   $[\text{M}+\text{H}]^+$  294.1653, found 294.1654.

**1-(1-(3-fluorophenyl)-3-phenylprop-2-ynyl)piperidine** (Table 2, entry 3)

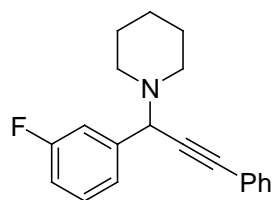

Pale yellow oil, 288 mg, 98%;  $^1\text{H}$  NMR ( $\text{CDCl}_3$ , 400 MHz)  $\delta$  7.58-7.51 (m, 2H), 7.49-7.30 (m, 6H), 7.00 (td,  $J = 2.60, 8.28$  Hz, 1H), 4.81 (s, 1H), 2.65-2.48 (m, 4H), 1.71-1.54 (m, 4H), 1.53-1.40 (m, 2H);  $^{13}\text{C}$  NMR ( $\text{CDCl}_3$ , 100 MHz)  $\delta$  162.8 (d,  $J_{\text{CF}} = 243.6$  Hz), 141.5 (d,  $J_{\text{CF}} = 7.0$  Hz), 131.8, 129.4 (d,  $J_{\text{CF}} = 8.0$  Hz), 128.3, 128.2, 124.0 (d,  $J_{\text{CF}} = 2.7$  Hz), 123.1, 115.3 (d,  $J_{\text{CF}} = 22.3$  Hz), 114.3 (d,  $J_{\text{CF}} = 21.1$  Hz), 88.2, 85.3, 61.9 (d,  $J_{\text{CF}} = 2.0$  Hz), 50.7, 26.2, 24.4; HRMS (ESI):  $m/z$  calcd for  $\text{C}_{20}\text{H}_{20}\text{FN}$   $[\text{M}+\text{H}]^+$  294.1653, found 294.1648.

**1-(1-(2-fluorophenyl)-3-phenylprop-2-ynyl)piperidine** (Table 2, entry 4)

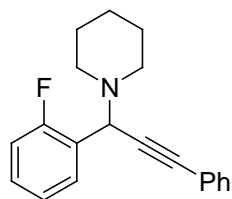

Pale yellow oil, 287 mg, 98%;  $^1\text{H}$  NMR ( $\text{CDCl}_3$ , 400 MHz)  $\delta$  7.69 (td,  $J = 1.80, 7.52$  Hz, 1H), 7.53-7.48 (m, 2H), 7.37-7.26 (m, 4H), 7.17 (td,  $J = 1.20, 7.56$  Hz, 1H), 7.08 (m, 1H), 5.10 (s, 1H), 2.62 (t,  $J = 5.16$  Hz, 4H), 1.67-1.54 (m, 4H), 1.47-1.37 (m, 2H);  $^{13}\text{C}$  NMR ( $\text{CDCl}_3$ , 100 MHz)  $\delta$  160.8 (d,  $J_{\text{CF}} = 246.9$  Hz), 131.8, 130.8 (d,  $J_{\text{CF}} = 3.6$  Hz), 129.4 (d,  $J_{\text{CF}} = 8.3$  Hz), 128.3, 128.2, 125.3 (d,  $J_{\text{CF}} = 13.3$  Hz), 123.5 (d,  $J_{\text{CF}} = 3.6$  Hz), 123.2, 115.5 (d,  $J_{\text{CF}} = 22.1$  Hz), 86.9, 86.0, 55.7 (d,  $J_{\text{CF}} = 2.4$  Hz), 50.8, 26.1, 24.4; HRMS (ESI):  $m/z$  calcd for  $\text{C}_{20}\text{H}_{20}\text{FN}$   $[\text{M}+\text{H}]^+$  294.1653, found 294.1648.

**1-(1-(4-methoxyphenyl)-3-phenylprop-2-ynyl)piperidine** (Table 2, entry 5)

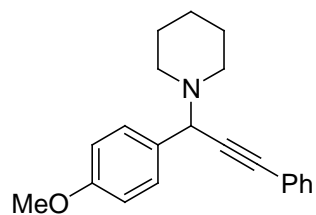

Yellow solid, 293 mg, 96%;  $^1\text{H}$  NMR ( $\text{CDCl}_3$ , 400 MHz)  $\delta$  7.59-7.49 (m, 4H), 7.38-7.31 (m, 3H), 6.94-6.88 (m, 2H), 4.76 (s, 1H), 3.83 (s, 3H), 2.63-2.48 (m, 4H), 1.66-1.51 (m, 4H), 1.50-1.38 (m, 2H);  $^{13}\text{C}$  NMR ( $\text{CDCl}_3$ , 100 MHz)  $\delta$  159.0, 131.8, 130.8, 129.7, 128.3, 128.0, 123.4, 113.4, 87.7, 86.5, 61.8, 55.3, 50.7, 26.3, 24.5; HRMS (ESI):  $m/z$  calcd for  $\text{C}_{21}\text{H}_{23}\text{NO}$   $[\text{M}+\text{H}]^+$  306.1852, found 306.1847.

**1-(1-(3-methoxyphenyl)-3-phenylprop-2-ynyl)piperidine** (Table 2, entry 6)

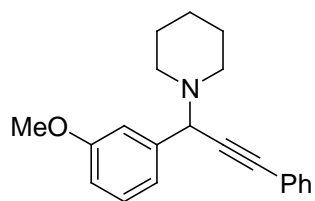

Yellow oil, 296 mg, 97%;  $^1\text{H}$  NMR ( $\text{CDCl}_3$ , 400 MHz)  $\delta$  7.57-7.49 (m, 2H), 7.37-7.28 (m, 4H), 7.27-7.23 (m, 2H), 6.86 (ddd,  $J = 1.56, 2.32, 7.80$  Hz, 1H), 4.79 (s, 1H), 3.85 (s, 3H), 2.66-2.48 (m, 4H), 1.70-1.53 (m, 4H), 1.50-1.41 (m, 2H);  $^{13}\text{C}$  NMR ( $\text{CDCl}_3$ , 100 MHz)  $\delta$  159.6, 140.4, 131.9, 129.0, 128.3, 128.1, 123.4, 120.9, 114.2, 112.8, 87.8, 86.1, 62.4, 55.3, 50.8, 26.3, 24.5; HRMS (ESI):  $m/z$  calcd for  $\text{C}_{21}\text{H}_{23}\text{NO}$   $[\text{M}+\text{H}]^+$  306.1852, found 306.1859.

**1-(1-(2-methoxyphenyl)-3-phenylprop-2-ynyl)piperidine** (Table 2, entry 7)

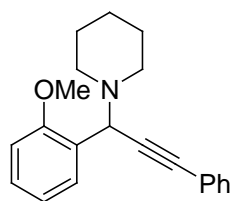

Yellow oil, 297 mg, 97%;  $^1\text{H}$  NMR ( $\text{CDCl}_3$ , 400 MHz)  $\delta$  7.65 (dd,  $J = 1.76, 7.60$  Hz, 1H), 7.51-7.45 (m, 2H), 7.34-7.28 (m, 4H), 6.99 (td,  $J = 1.04, 7.48$  Hz, 1H), 6.93 (dd,  $J = 0.96, 8.24$  Hz, 1H), 5.22 (s, 1H), 3.88 (s, 3H), 2.74-2.51 (m, 4H), 1.67-1.52 (m, 4H), 1.47-1.37 (m, 2H);  $^{13}\text{C}$  NMR ( $\text{CDCl}_3$ , 100 MHz)  $\delta$  158.4, 132.4, 129.9, 128.4, 127.3, 122.7, 120.8, 114.0, 86.8, 80.9, 56.1, 50.8, 44.9, 25.8, 25.3; HRMS (ESI):  $m/z$  calcd for  $\text{C}_{21}\text{H}_{23}\text{NO}$   $[\text{M}+\text{H}]^+$  306.1852, found 306.1849.

**1-(1-(naphthalen-1-yl)-3-phenylprop-2-ynyl)piperidine** (Table 2, entry 8)

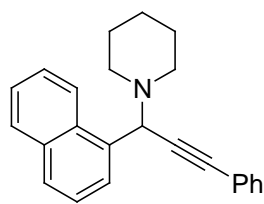

Yellow solid, 309 mg, 95%;  $^1\text{H}$  NMR ( $\text{CDCl}_3$ , 400 MHz)  $\delta$  8.43 (d,  $J = 8.36$  Hz, 1H), 7.95 (d,  $J = 7.04$  Hz, 1H), 7.88 (d,  $J = 7.80$  Hz, 1H), 7.83 (d,  $J = 8.20$  Hz, 1H), 7.61-7.43 (m, 5H), 7.41-7.31 (m, 3H), 5.45 (s, 1H), 2.77-2.54 (m, 4H), 1.63-1.51 (m, 4H), 1.49-1.43 (m, 2H);  $^{13}\text{C}$  NMR ( $\text{CDCl}_3$ , 100 MHz)  $\delta$  134.3, 134.1, 132.0, 131.9, 128.6, 128.5, 128.4, 128.1, 126.9, 125.8, 125.6, 125.1, 124.8, 123.5, 88.6, 86.0, 60.6, 50.8, 26.4, 24.7; HRMS (ESI):  $m/z$  calcd for  $\text{C}_{24}\text{H}_{23}\text{N}$   $[\text{M}+\text{H}]^+$  326.1903, found 326.1904.

**1-(1-(naphthalen-2-yl)-3-phenylprop-2-ynyl)piperidine** (Table 2, entry 9)

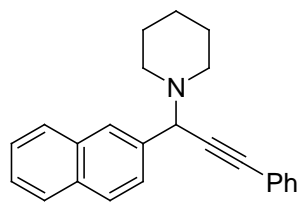

Pale yellow solid, 316 mg, 97%;  $^1\text{H}$  NMR ( $\text{CDCl}_3$ , 400 MHz)  $\delta$  8.11 (s, 1H), 7.95-7.75 (m, 4H), 7.64-7.55 (m, 2H), 7.54-7.45 (m, 2H), 7.43-7.32 (m, 3H), 4.97 (s, 1H), 2.63 (t,  $J = 5.32$  Hz, 4H), 1.79-1.54 (m, 4H), 1.54-1.39 (m, 2H);  $^{13}\text{C}$  NMR ( $\text{CDCl}_3$ , 100 MHz)  $\delta$  136.4, 133.2, 133.1, 131.9, 128.4, 128.2, 128.2, 127.8, 127.7, 127.4, 126.8, 126.0, 125.9, 123.5, 88.2, 86.1, 62.6, 50.9, 26.3, 24.6; HRMS (ESI):  $m/z$  calcd for  $\text{C}_{24}\text{H}_{23}\text{N}$   $[\text{M}+\text{H}]^+$  326.1903, found 326.1900.

**1-(1-(2,6-dichlorophenyl)-3-phenylprop-2-ynyl)piperidine** (Table 2, entry 10)

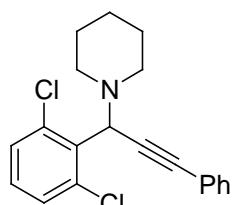

Pale yellow oil, 302 mg, 88%;  $^1\text{H}$  NMR ( $\text{CDCl}_3$ , 400 MHz)  $\delta$  7.50-7.44 (m, 2H), 7.34 (d,  $J = 4.52$  Hz, 2H), 7.32-7.28 (m, 3H), 7.16 (dd,  $J = 7.64, 8.44$  Hz, 1H), 5.26 (s, 1H), 2.93-2.74 (br, 2H), 2.52-2.38 (m, 2H), 1.66-1.53 (m, 4H), 1.50-1.39 (m, 2H);  $^{13}\text{C}$  NMR ( $\text{CDCl}_3$ , 100 MHz)  $\delta$  136.5, 134.5, 131.8, 129.4, 128.9, 128.2, 128.1, 123.4, 86.3, 86.2, 58.4, 52.1, 26.2,

24.5; HRMS (ESI):  $m/z$  calcd for  $C_{20}H_{19}Cl_2N$   $[M+H]^+$  344.0967, found 344.0968.

**1-(1-(2,6-dimethoxyphenyl)-3-phenylprop-2-ynyl)piperidine** (Table 2, entry 11)

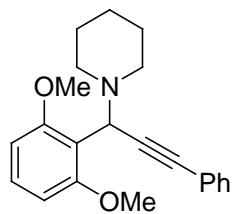

Yellow solid, 329 mg, 98%;  $^1H$  NMR ( $CDCl_3$ , 400 MHz)  $\delta$  7.48-7.43 (m, 2H), 7.33-7.22 (m, 4H), 6.61 (d,  $J = 8.32$  Hz, 2H), 5.37 (s, 1H), 3.96 (s, 6H), 2.79-2.62 (m, 4H), 2.52-2.38 (m, 2H), 1.69-1.52 (m, 4H), 1.46-1.36 (m, 2H);  $^{13}C$  NMR ( $CDCl_3$ , 100 MHz)  $\delta$  159.2, 131.7, 129.2, 128.1, 127.4, 124.4, 114.9, 105.1, 89.0, 83.1, 56.2, 51.7, 51.4, 26.0, 24.3; HRMS (ESI):  $m/z$  calcd for  $C_{22}H_{25}NO_2$   $[M+H]^+$  336.1958, found 336.1959.

**1-(1-phenylhept-1-yn-3-yl)piperidine** (Table 2, entry 12)

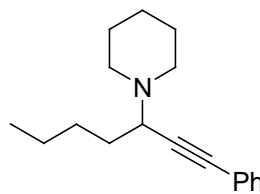

Brown red oil, 253 mg, 99%;  $^1H$  NMR ( $CDCl_3$ , 400 MHz)  $\delta$  7.48-7.43 (m, 2H), 7.34-7.28 (m, 3H), 3.49 (dd,  $J = 1.88, 9.08$  Hz, 1H), 2.76-2.64 (m, 2H), 2.56-2.44 (m, 2H), 1.78-1.70 (m, 2H), 1.68-1.54 (m, 5H), 1.52-1.37 (m, 5H), 0.94 (t,  $J = 7.20$  Hz, 3H);  $^{13}C$  NMR ( $CDCl_3$ , 100 MHz)  $\delta$  131.7, 128.2, 127.8, 123.6, 88.1, 85.7, 58.6, 50.7, 33.2, 29.2, 26.2, 24.6, 22.5, 14.1; HRMS (ESI):  $m/z$  calcd for  $C_{18}H_{25}N$   $[M+H]^+$  256.2060, found 256.2066.

**1-(5-methyl-1-phenylhex-1-yn-3-yl)piperidine** (Table 2, entry 13)

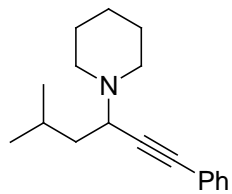

Yellow oil, 252 mg, 99%;  $^1H$  NMR ( $CDCl_3$ , 400 MHz)  $\delta$  7.47-7.42 (m, 2H), 7.34-7.28 (m, 3H), 3.59 (dd,  $J = 5.64, 9.76$  Hz, 1H), 2.77-2.63 (m, 2H), 2.58-2.44 (m, 2H), 1.96-1.84 (m, 1H), 1.74-1.55 (m, 6H), 1.51-1.44 (m, 2H), 0.99 (d,  $J = 6.68$  Hz, 3H), 0.96 (d,  $J = 6.60$  Hz, 3H);  $^{13}C$  NMR ( $CDCl_3$ , 100 MHz)  $\delta$  131.7, 128.2, 127.7, 123.7, 88.2, 85.7, 56.7, 50.6, 42.3, 26.2, 25.4, 24.6, 23.2, 22.1; HRMS (ESI):  $m/z$  calcd for  $C_{18}H_{25}N$   $[M+H]^+$  256.2060, found

256.2058.

**1-(1-phenyldec-1-yn-3-yl)piperidine** (Table 2, entry 14)

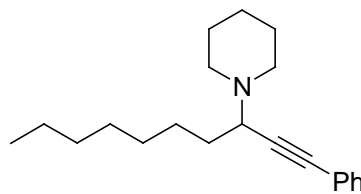

Yellow oil, 289 mg, 97%; <sup>1</sup>H NMR (CDCl<sub>3</sub>, 400 MHz) δ 7.48-7.43 (m, 2H), 7.34-7.28 (m, 3H), 3.49 (dd, *J* = 5.64, 9.24 Hz, 1H), 2.76-2.65 (m, 2H), 2.58-2.44 (m, 2H), 1.79-1.53 (m, 8H), 1.51-1.43 (m, 3H), 1.36-1.26 (m, 7H), 0.90 (t, *J* = 7.04 Hz, 3H); <sup>13</sup>C NMR (CDCl<sub>3</sub>, 100 MHz) δ 131.7, 128.2, 127.7, 123.6, 88.2, 85.6, 58.7, 50.6, 33.5, 31.9, 29.4, 29.2, 26.9, 26.2, 24.6, 22.7, 14.1; HRMS (ESI): *m/z* calcd for C<sub>21</sub>H<sub>31</sub>N [M+H]<sup>+</sup> 298.2529, found 298.2527.

**1-(1-cyclopentyl-3-phenylprop-2-ynyl)piperidine** (Table 2, entry 15)

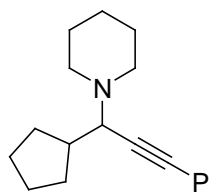

Pale yellow oil, 243 mg, 91%; <sup>1</sup>H NMR (CDCl<sub>3</sub>, 400 MHz) δ 7.48-7.43 (m, 2H), 7.35-7.28 (m, 3H), 3.24 (d, *J* = 9.32 Hz, 1H), 2.74-2.63 (m, 2H), 2.51-2.39 (m, 2H), 2.32-2.17 (m, 1H), 1.96-1.84 (m, 1H), 1.83-1.72 (m, 1H), 1.68-1.56 (m, 7H), 1.55-1.43 (m, 5H); <sup>13</sup>C NMR (CDCl<sub>3</sub>, 100 MHz) δ 131.7, 128.2, 127.7, 123.8, 88.0, 85.6, 63.7, 50.8, 42.4, 30.8, 30.5, 26.2, 25.5, 25.3, 24.7; HRMS (ESI): *m/z* calcd for C<sub>19</sub>H<sub>25</sub>N [M+H]<sup>+</sup> 268.2060, found 268.2060.

**1-(1-cyclohexyl-3-phenylprop-2-ynyl)piperidine** (Table 2, entry 16)

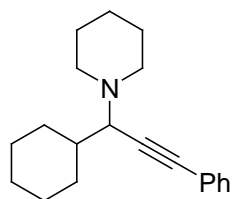

Pale yellow oil, 264 mg, 94%; <sup>1</sup>H NMR (CDCl<sub>3</sub>, 400 MHz) δ 7.51-7.40 (m, 2H), 7.37-7.23 (m, 3H), 3.13 (d, *J* = 9.80 Hz, 1H), 2.71-2.57 (m, 2H), 2.49-2.32 (m, 2H), 2.20-1.99 (m, 2H), 1.86-1.72 (m, 2H), 1.72-1.50 (m, 6H), 1.50-1.39 (m, 2H), 1.36-1.12 (m, 3H),

1.10-0.86 (m, 2H);  $^{13}\text{C}$  NMR ( $\text{CDCl}_3$ , 100 MHz)  $\delta$  131.7, 128.2, 127.6, 123.9, 87.8, 86.2, 64.4, 50.8, 39.6, 31.4, 30.5, 26.9, 26.3(4), 26.3(1), 26.2, 24.8; HRMS (ESI):  $m/z$  calcd for  $\text{C}_{20}\text{H}_{27}\text{N}$   $[\text{M}+\text{H}]^+$  282.2216, found 282.2222.

**1-(1-(furan-2-yl)-3-phenylprop-2-ynyl)piperidine** (Table 2, entry 17)

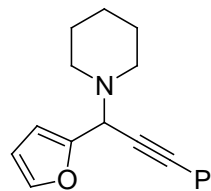

Brown oil, 236 mg, 89%;  $^1\text{H}$  NMR ( $\text{CDCl}_3$ , 400 MHz)  $\delta$  7.54-7.49 (m, 2H), 7.44 (dd,  $J = 0.84, 1.72$  Hz, 1H), 7.37-7.31 (m, 3H), 6.50 (dt,  $J = 0.84, 3.20$  Hz, 1H), 6.36 (dd,  $J = 1.84, 3.20$  Hz, 1H), 4.89 (s, 1H), 2.68-2.52 (m, 4H), 1.75-1.55 (m, 4H), 1.53-1.40 (m, 2H);  $^{13}\text{C}$  NMR ( $\text{CDCl}_3$ , 100 MHz)  $\delta$  151.6, 142.6, 131.9, 128.3, 122.9, 110.0, 109.3, 86.4, 83.8, 56.6, 50.5, 26.0, 24.3; HRMS (ESI):  $m/z$  calcd for  $\text{C}_{18}\text{H}_{19}\text{NO}$   $[\text{M}+\text{Na}]^+$  288.1359, found 288.1360.

**1-(3-phenyl-1-(thiophen-2-yl)prop-2-ynyl)piperidine** (Table 2, entry 18)

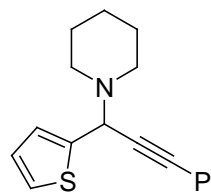

Brown solid, 228 mg, 81%;  $^1\text{H}$  NMR ( $\text{CDCl}_3$ , 400 MHz)  $\delta$  7.57-7.51 (m, 2H), 7.38-7.33 (m, 3H), 7.29 (ddd,  $J = 0.40, 1.20, 5.08$  Hz, 1H), 7.24 (dt,  $J = 1.24, 3.48$  Hz, 1H), 6.98 (dd,  $J = 3.52, 9.16$  Hz, 1H), 5.01 (s, 1H), 2.73-2.53 (m, 4H), 1.71-1.55 (m, 4H), 1.52-1.40 (m, 2H);  $^{13}\text{C}$  NMR ( $\text{CDCl}_3$ , 100 MHz)  $\delta$  144.1, 131.9, 128.4, 128.3, 126.2, 125.9, 125.4, 123.1, 87.0, 85.4, 58.3, 50.7, 26.2, 24.5; HRMS (ESI):  $m/z$  calcd for  $\text{C}_{18}\text{H}_{19}\text{NS}$   $[\text{M}+\text{H}]^+$  282.1311, found 282.1316.

**1-(3-(4-methoxyphenyl)-1-phenylprop-2-ynyl)piperidine** (Table 3, entry 1)

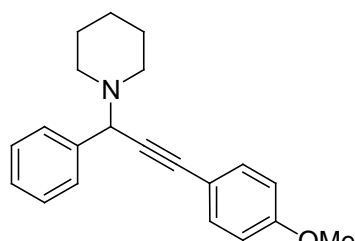

Yellow solid, 296 mg, 97%;  $^1\text{H}$  NMR ( $\text{CDCl}_3$ , 400 MHz)



$\delta$  7.70-7.59 (m, 2H), 7.52-7.42 (m, 2H), 7.40-7.23 (m, 3H), 6.92-6.82 (m, 2H), 4.79 (s, 1H), 3.84 (s, 3H), 2.57 (t,  $J = 5.36$  Hz, 4H), 1.69-1.52 (m, 4H), 1.50-1.38 (m, 2H);  $^{13}\text{C}$  NMR ( $\text{CDCl}_3$ , 100 MHz)  $\delta$  159.5, 138.9, 133.2, 128.6, 128.1, 127.4, 115.6, 113.9, 87.7, 84.6, 62.5, 55.3, 50.7, 26.3, 24.5; HRMS (ESI):  $m/z$  calcd for  $\text{C}_{21}\text{H}_{23}\text{NO}$   $[\text{M}+\text{H}]^+$  306.1852, found 306.1856.

**1-(3-(3,4-dimethoxyphenyl)-1-phenylprop-2-ynyl)piperidine** (Table 3, entry 2)

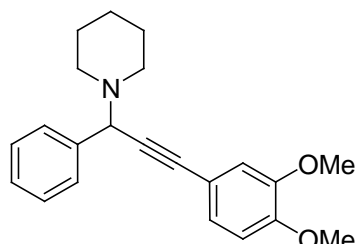

Pale yellow oil, 319 mg, 95%;  $^1\text{H}$  NMR ( $\text{CDCl}_3$ , 400 MHz)  $\delta$  7.68-7.62 (m, 2H), 7.41-7.35 (m, 2H), 7.34-7.29 (m, 1H), 7.13 (dd,  $J = 1.80, 8.24$  Hz, 1H), 7.02 (d,  $J = 1.80$  Hz, 1H), 6.83 (d,  $J = 8.32$  Hz, 1H), 4.79 (s, 1H), 3.92 (s, 3H), 3.91 (s, 3H), 2.58 (t,  $J = 5.04$  Hz, 4H), 1.68-1.54 (m, 4H), 1.50-1.40 (m, 2H);  $^{13}\text{C}$  NMR ( $\text{CDCl}_3$ , 100 MHz)  $\delta$  149.3, 148.6, 138.7, 128.6, 128.1, 127.5, 125.1, 115.6, 114.5, 111.0, 87.7, 84.5, 62.5, 55.9(4), 55.9(1), 50.8, 26.2, 24.4; HRMS (ESI):  $m/z$  calcd for  $\text{C}_{22}\text{H}_{25}\text{NO}_2$   $[\text{M}+\text{Na}]^+$  357.1778, found 358.1776.

**1-(1-phenyl-3-*p*-tolylprop-2-ynyl)piperidine** (Table 3, entry 3)

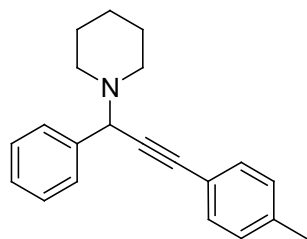

Pale yellow oil, 280 mg, 97%;  $^1\text{H}$  NMR ( $\text{CDCl}_3$ , 400 MHz)  $\delta$  7.69-7.63 (m, 2H), 7.46-7.42 (m, 2H), 7.41-7.35 (m, 2H), 7.34-7.29 (m, 1H), 7.19-7.13 (m, 2H), 4.81 (s, 1H), 2.58 (t,  $J = 5.16$  Hz, 4H), 2.38 (s, 3H), 1.68-1.54 (m, 4H), 1.50-1.42 (m, 2H);  $^{13}\text{C}$  NMR ( $\text{CDCl}_3$ , 100 MHz)  $\delta$  138.8, 138.1, 131.8, 129.1, 128.6, 128.1, 127.5, 120.4, 88.0, 85.4, 62.5, 50.7, 26.3, 24.5, 21.5; HRMS (ESI):  $m/z$  calcd for  $\text{C}_{21}\text{H}_{23}\text{N}$   $[\text{M}+\text{H}]^+$  290.1903, found 290.1906.

**1-(1-phenyl-3-*m*-tolylprop-2-ynyl)piperidine** (Table 3, entry 4)

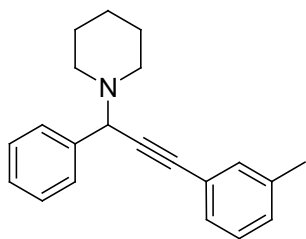

Pale yellow oil, 283 mg, 98%;  $^1\text{H}$  NMR ( $\text{CDCl}_3$ , 400 MHz)  $\delta$  7.69-7.64 (m, 2H), 7.42-7.29 (m, 5H), 7.27-7.21 (m, 1H), 7.18-7.13 (m, 1H), 4.82 (s, 1H), 2.59 (t,  $J = 5.04$  Hz, 4H), 2.37 (s, 3H), 1.71-1.53 (m, 4H), 1.50-1.40 (m, 2H);  $^{13}\text{C}$  NMR ( $\text{CDCl}_3$ , 100 MHz)  $\delta$  138.8, 138.0, 132.4, 129.0, 128.9, 128.6, 128.2, 128.1, 127.5, 123.2, 88.1, 85.7, 62.4, 50.8, 26.3, 24.5, 21.3; HRMS (ESI):  $m/z$  calcd for  $\text{C}_{21}\text{H}_{23}\text{N}$   $[\text{M}+\text{H}]^+$  290.1903, found 290.1901.

**1-(3-(4-fluorophenyl)-1-phenylprop-2-ynyl)piperidine** (Table 3, entry 5)

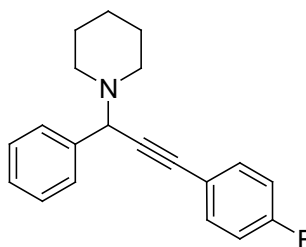

Pale yellow oil, 273 mg, 93%;  $^1\text{H}$  NMR ( $\text{CDCl}_3$ , 400 MHz)  $\delta$  7.66-7.61 (m, 2H), 7.55-7.47 (m, 2H), 7.42-7.35 (m, 2H), 7.34-7.28 (m, 1H), 7.08-7.00 (m, 2H), 4.80 (s, 1H), 2.57 (t,  $J = 5.40$  Hz, 4H), 1.71-1.52 (m, 4H), 1.51-1.38 (m, 2H);  $^{13}\text{C}$  NMR ( $\text{CDCl}_3$ , 100 MHz)  $\delta$  162.4 (d,  $J_{\text{CF}} = 247.5$  Hz), 138.5, 133.6 (d,  $J_{\text{CF}} = 8.2$  Hz), 128.5, 128.1, 127.5, 119.4 (d,  $J_{\text{CF}} = 3.5$  Hz), 115.5 (d,  $J_{\text{CF}} = 21.8$  Hz), 86.8, 85.8, 62.4, 50.8, 26.2, 24.5; HRMS (ESI):  $m/z$  calcd for  $\text{C}_{20}\text{H}_{20}\text{FN}$   $[\text{M}+\text{H}]^+$  294.1653, found 294.1654.

**1-(3-(4-bromophenyl)-1-phenylprop-2-ynyl)piperidine** (Table 3, entry 6)

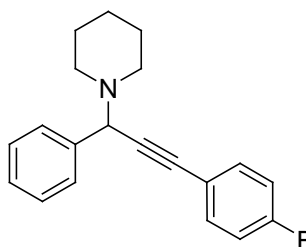

Yellow solid, 346 mg, 98%;  $^1\text{H}$  NMR ( $\text{CDCl}_3$ , 400 MHz)  $\delta$  7.65-7.60 (m, 2H), 7.50-7.45 (m, 2H), 7.42-7.35 (m, 4H), 7.34-7.29 (m, 1H), 4.79 (s, 1H), 2.56 (t,  $J = 5.20$  Hz, 4H), 1.68-1.53 (m, 4H), 1.50-1.39 (m, 2H);  $^{13}\text{C}$  NMR ( $\text{CDCl}_3$ , 100 MHz)  $\delta$  138.4, 133.3, 131.6, 128.5, 128.2, 127.6, 122.3, 122.2, 87.5, 86.8, 62.5, 50.8, 26.2, 24.5; HRMS (ESI):

$m/z$  calcd for  $C_{20}H_{20}BrN$   $[M+H]^+$  354.0852, found 354.0854.

**1-(1-phenyloct-2-ynyl)piperidine** (Table 3, entry 7)

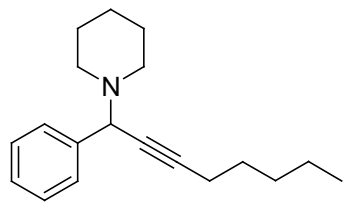

Yellow oil, 264 mg, 98%;  $^1H$  NMR ( $CDCl_3$ , 400 MHz)  $\delta$  7.60-7.55 (m, 2H), 7.38-7.32 (m, 2H), 7.31-7.25 (m, 1H), 4.55 (s, 1H), 2.48 (t,  $J = 5.08$  Hz, 4H), 2.33 (td,  $J = 2.16, 7.04$  Hz, 2H), 1.66-1.52 (m, 6H), 1.50-1.29 (m, 6H), 0.94 (t,  $J = 7.22$  Hz, 3H);  $^{13}C$  NMR ( $CDCl_3$ , 100 MHz)  $\delta$  139.3, 128.5, 127.9, 127.2, 87.9, 76.3, 62.0, 50.6, 31.2, 28.8, 26.2, 24.6, 22.2, 18.8, 14.1; HRMS (ESI):  $m/z$  calcd for  $C_{19}H_{27}N$   $[M+H]^+$  270.2216, found 270.2222.

**1-(1-phenyl-3-(thiophen-2-yl)prop-2-ynyl)piperidine** (Table 3, entry 8)

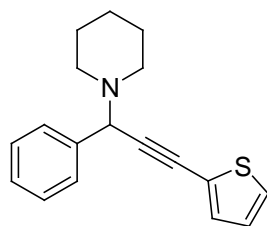

Yellow solid, 239 mg, 85%;  $^1H$  NMR ( $CDCl_3$ , 400 MHz)  $\delta$  7.65-7.60 (m, 2H), 7.41-7.35 (m, 2H), 7.41-7.35 (m, 1H), 7.28-7.24 (m, 2H), 7.00 (dd,  $J = 3.68, 4.92$  Hz, 1H), 4.83 (s, 1H), 2.57 (t,  $J = 5.40$  Hz, 4H), 1.70-1.52 (m, 4H), 1.50-1.37 (m, 2H);  $^{13}C$  NMR ( $CDCl_3$ , 100 MHz)  $\delta$  138.3, 131.8, 128.5, 128.1, 127.6, 126.9, 126.6, 123.3, 90.3, 80.9, 62.6, 50.8, 26.2, 24.4; HRMS (ESI):  $m/z$  calcd for  $C_{18}H_{19}NS$   $[M+H]^+$  282.1311, found 282.1316.

**4-(1,3-diphenylprop-2-ynyl)morpholine** (Table 4, entry 1)

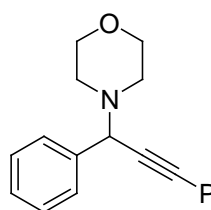

Pale yellow oil, 266 mg, 96%;  $^1H$  NMR ( $CDCl_3$ , 400 MHz)  $\delta$  7.69-7.63 (m, 2H), 7.57-7.50 (m, 2H), 7.43-7.30 (m, 6H), 4.92 (s, 1H), 3.84-3.68 (m, 4H), 2.72-2.60 (m, 4H);  $^{13}C$  NMR ( $CDCl_3$ , 100 MHz)  $\delta$  137.9, 131.9, 128.7, 128.3(8), 128.3(2), 128.3(0), 127.8, 123.0, 88.6, 85.1, 67.2, 62.1, 49.9; HRMS (ESI):  $m/z$  calcd for  $C_{19}H_{19}NO$   $[M+H]^+$  278.1539,

found 278.1539.

**1-(1,3-diphenylprop-2-ynyl)pyrrolidine** (Table 4, entry 2)

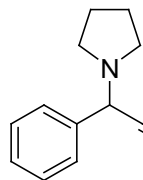

Pale yellow oil, 228 mg, 87%;  $^1\text{H}$  NMR ( $\text{CDCl}_3$ , 400 MHz)  $\delta$  7.66-7.61 (m, 2H), 7.54-7.48 (m, 2H), 7.42-7.29 (m, 6H), 4.92 (s, 1H), 2.80-2.64 (m, 4H), 1.89-1.76 (m, 4H);  $^{13}\text{C}$  NMR ( $\text{CDCl}_3$ , 100 MHz)  $\delta$  139.5, 131.8, 128.3(4), 128.3(1), 128.1, 127.6, 123.3, 87.0, 86.7, 59.2, 50.3, 23.5; HRMS (ESI):  $m/z$  calcd for  $\text{C}_{19}\text{H}_{19}\text{N}$   $[\text{M}+\text{H}]^+$  262.1590, found 262.1590.

***N,N*-dibenzyl-1,3-diphenylprop-2-yn-1-amine** (Table 4, entry 3)

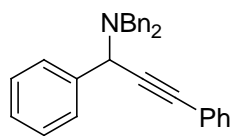

Colorless solid, 376 mg, 97%;  $^1\text{H}$  NMR ( $\text{CDCl}_3$ , 400 MHz)  $\delta$  7.80-7.74 (m, 2H), 7.70-7.64 (m, 2H), 7.51-7.23 (m, 16H), 4.97 (s, 1H), 3.83 (d,  $J = 13.44$  Hz, 2H), 3.58 (d,  $J = 13.48$  Hz, 2H);  $^{13}\text{C}$  NMR ( $\text{CDCl}_3$ , 100 MHz)  $\delta$  139.7, 139.3, 132.1, 129.1, 128.6, 128.5, 128.40, 128.3, 127.6, 127.2, 123.4, 88.8, 84.9, 56.2, 54.8; HRMS (ESI):  $m/z$  calcd for  $\text{C}_{29}\text{H}_{25}\text{N}$   $[\text{M}+\text{H}]^+$  388.2060, found 388.2059.

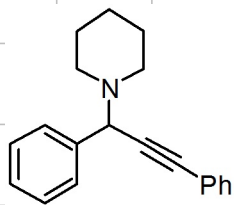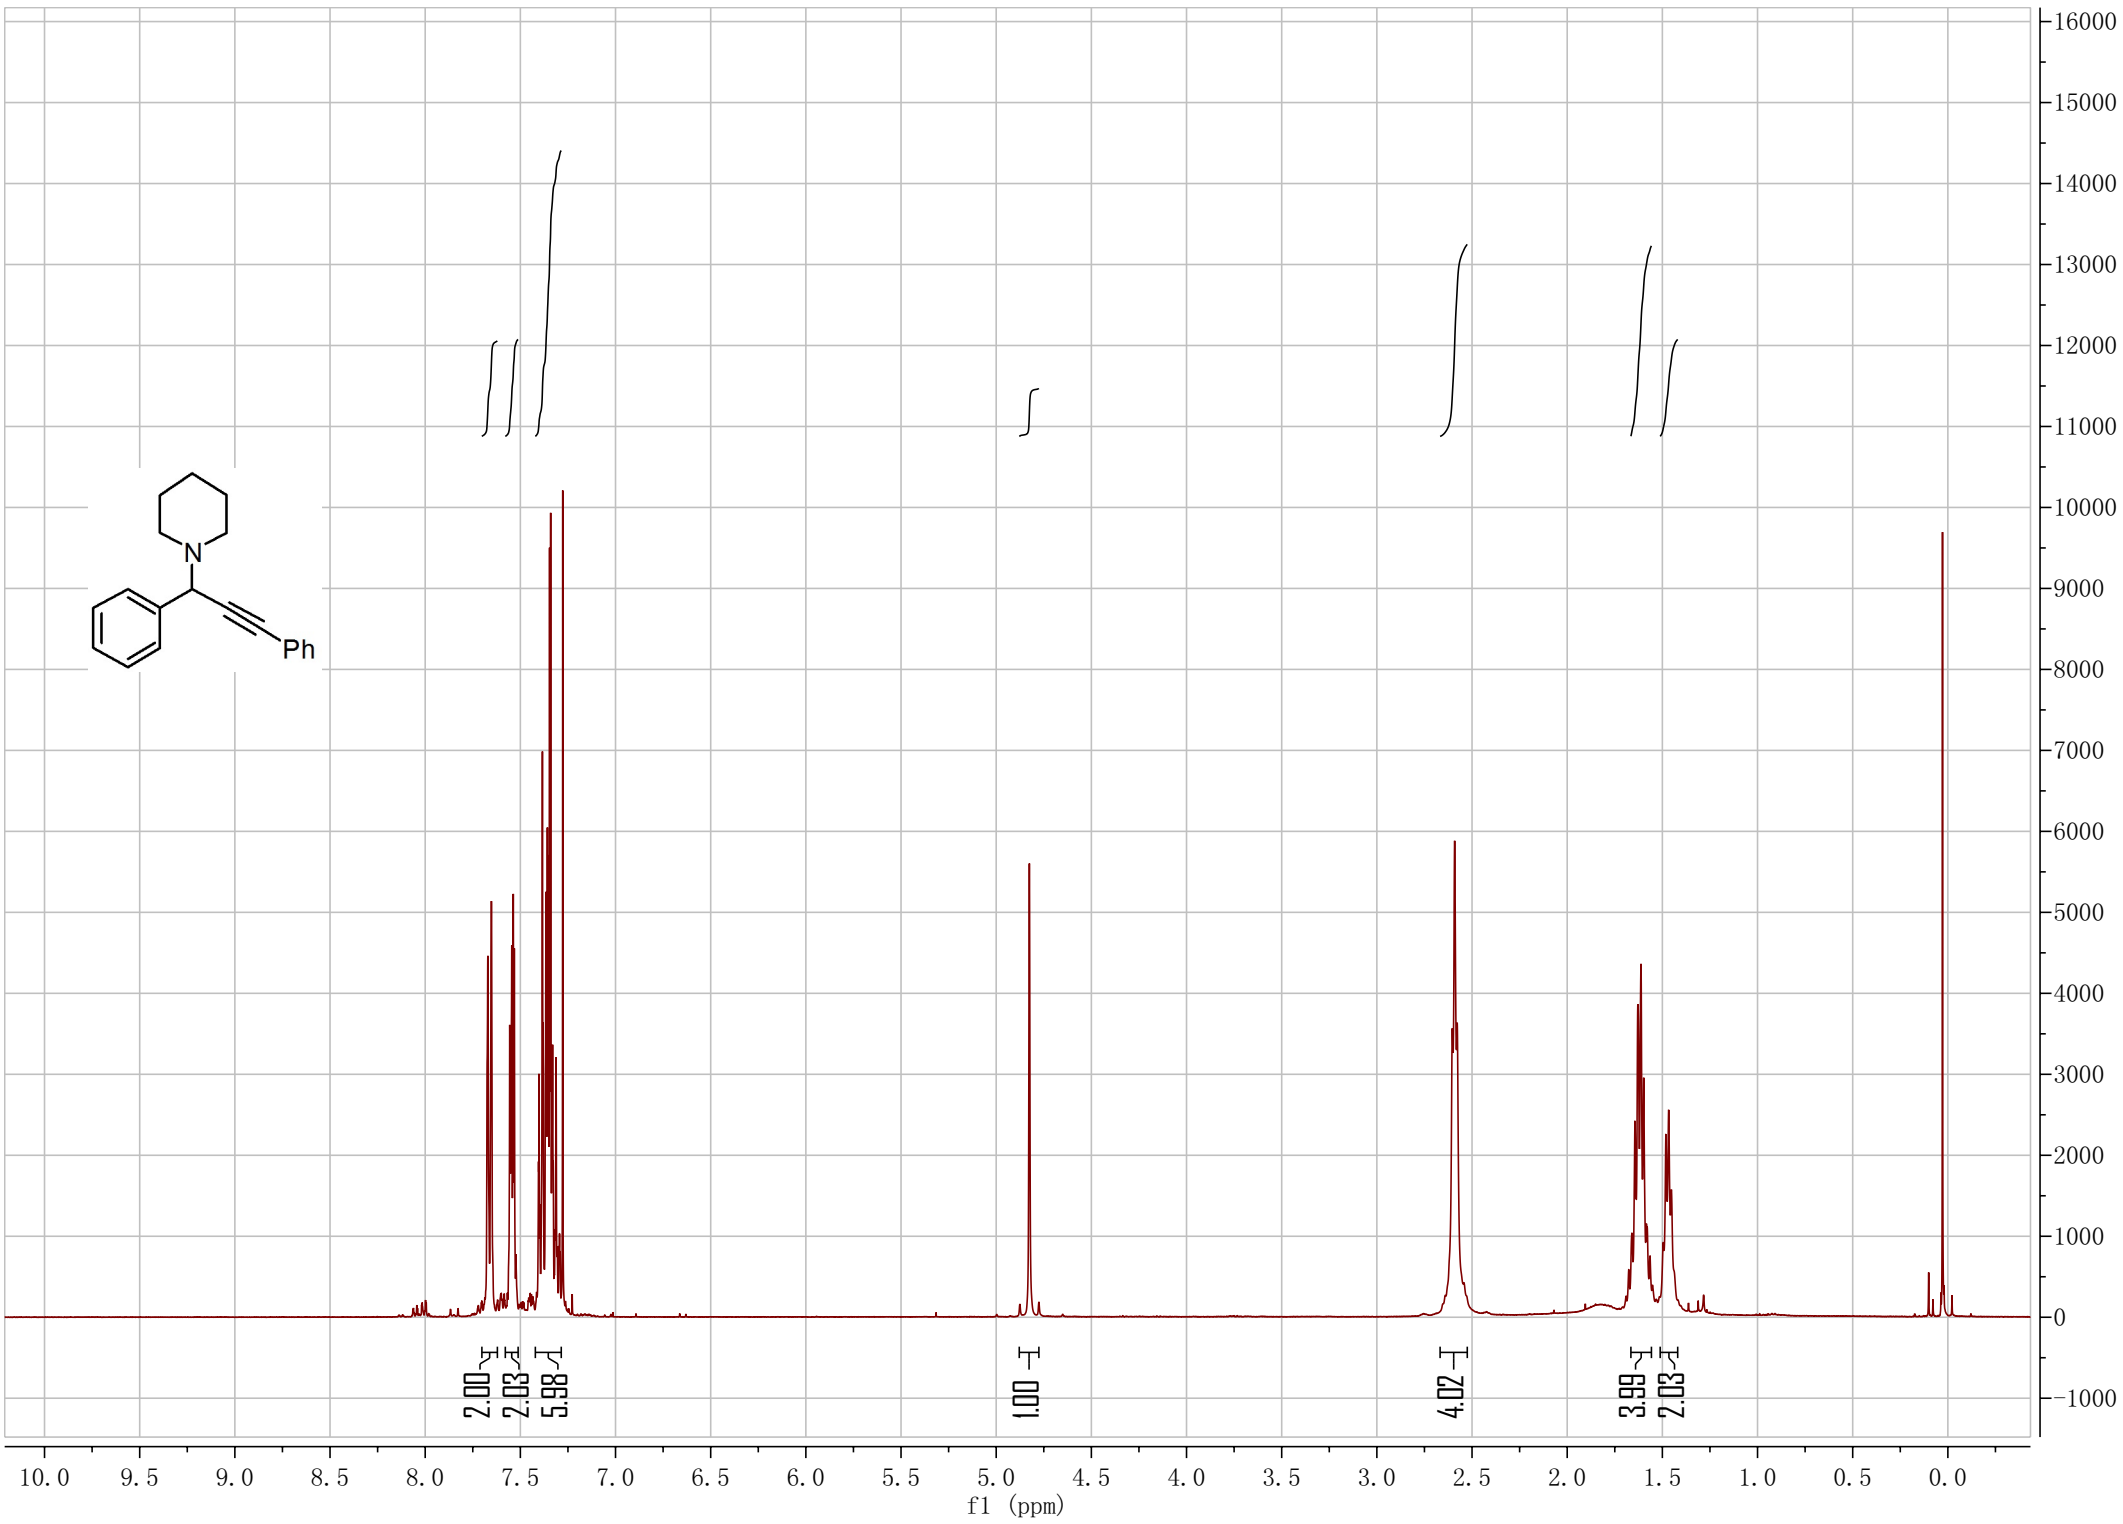

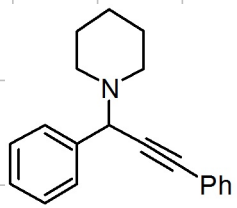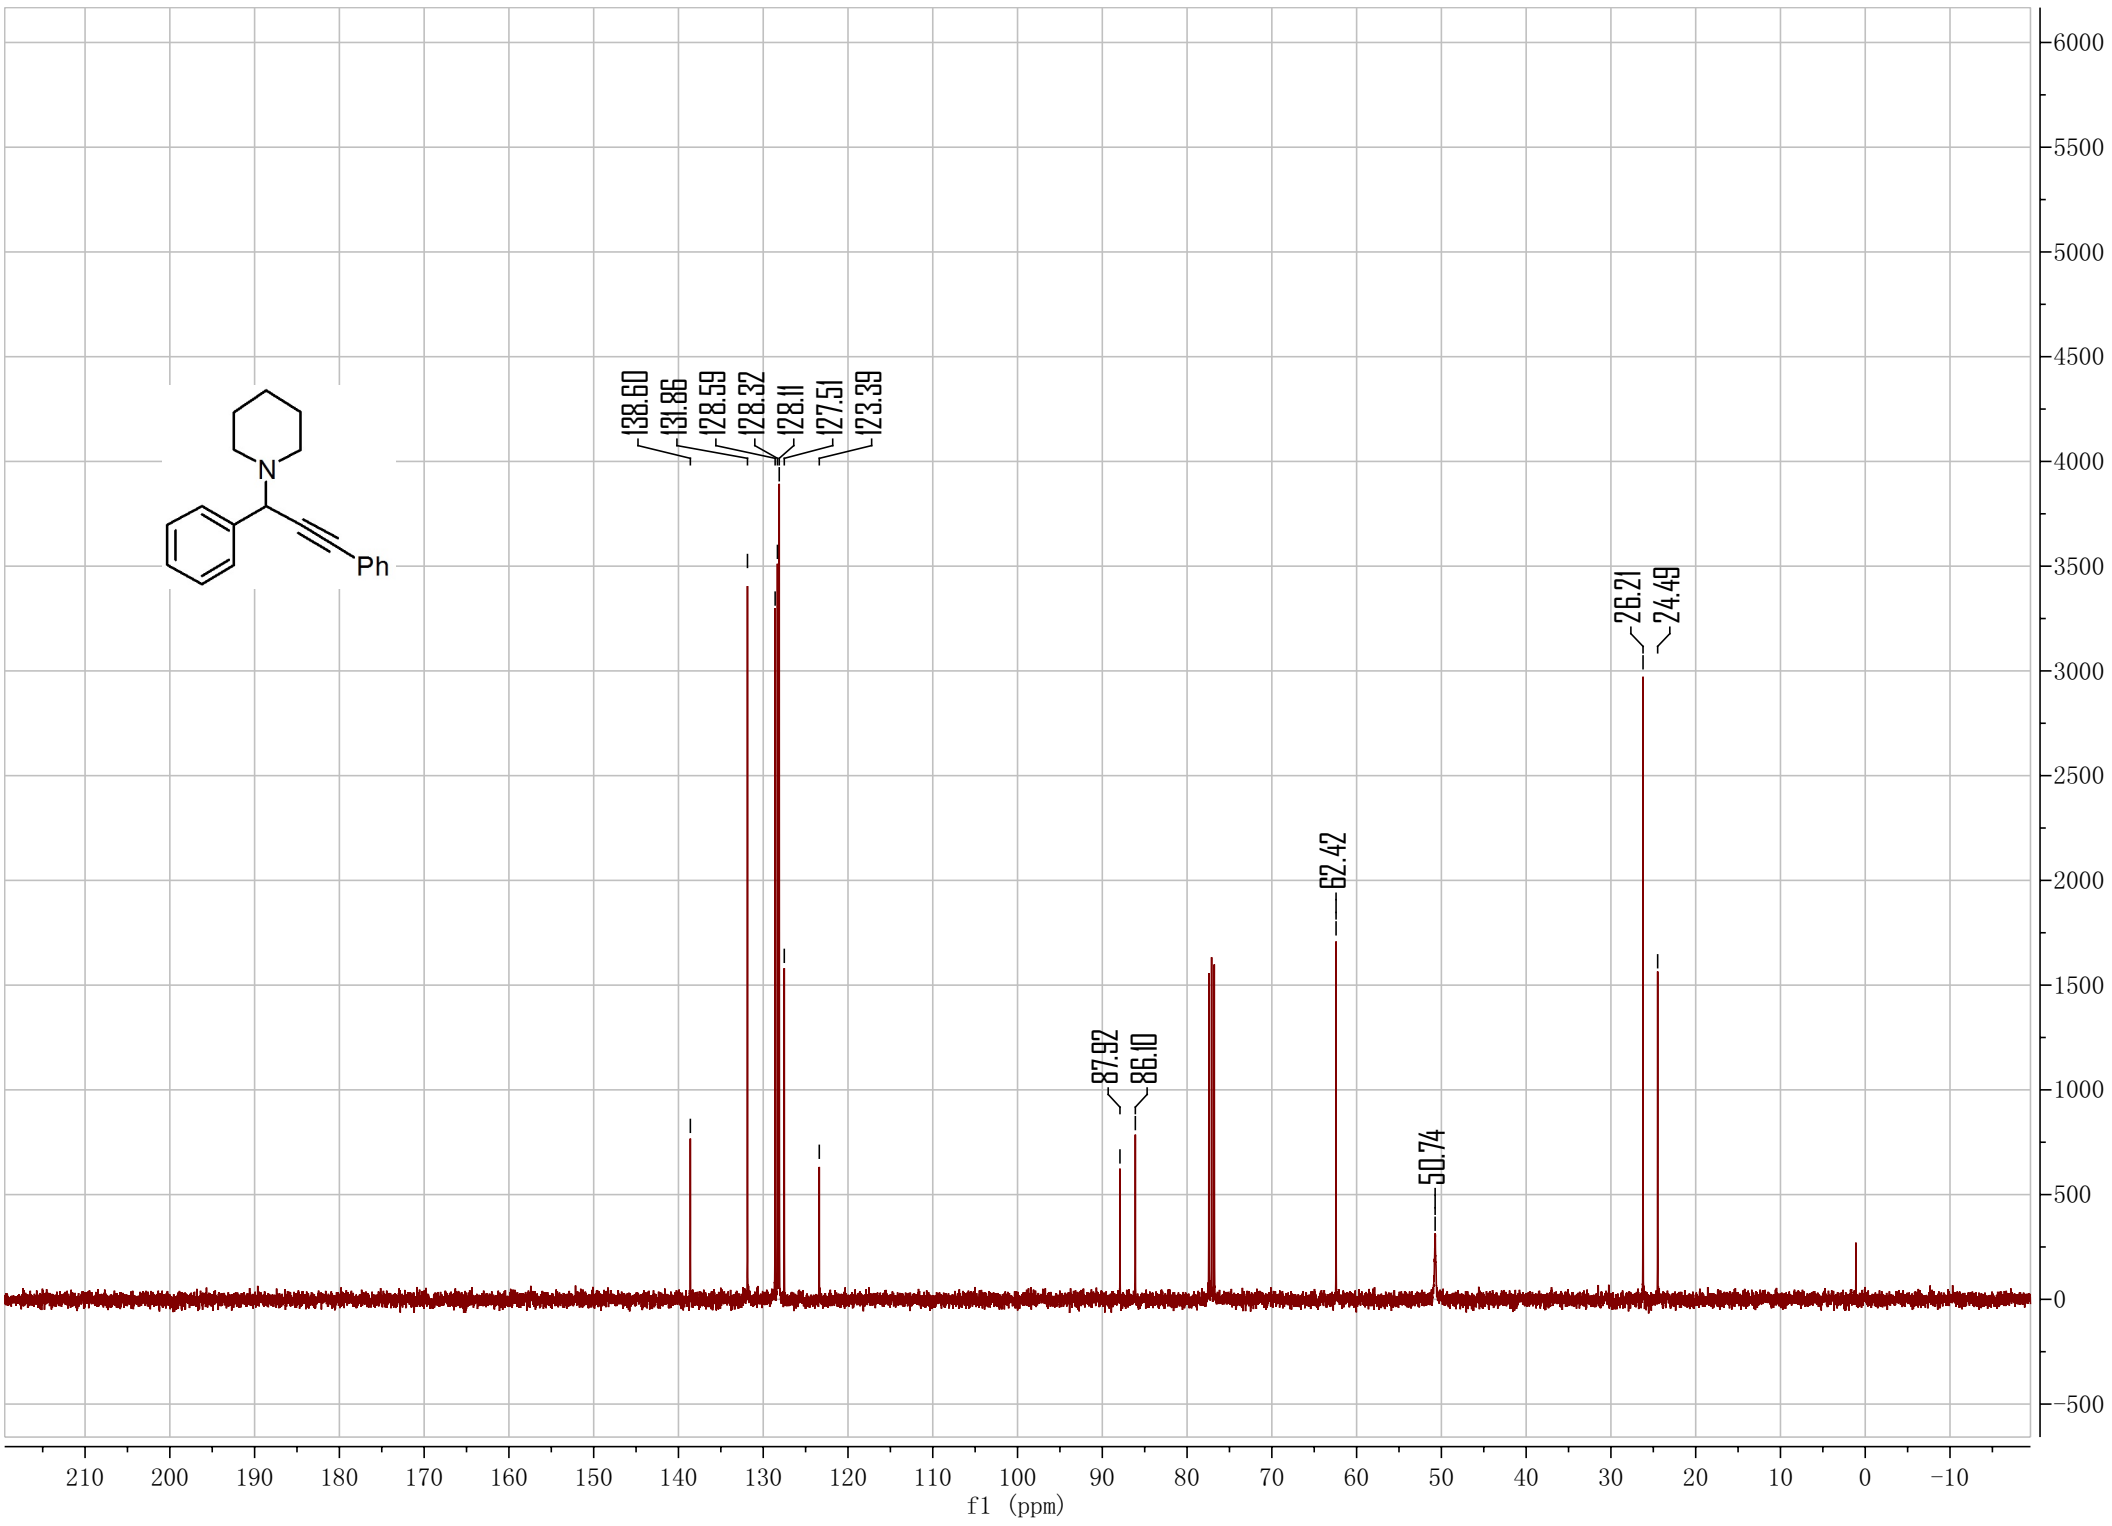

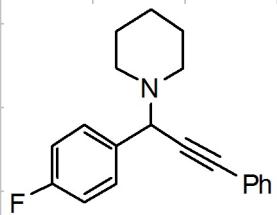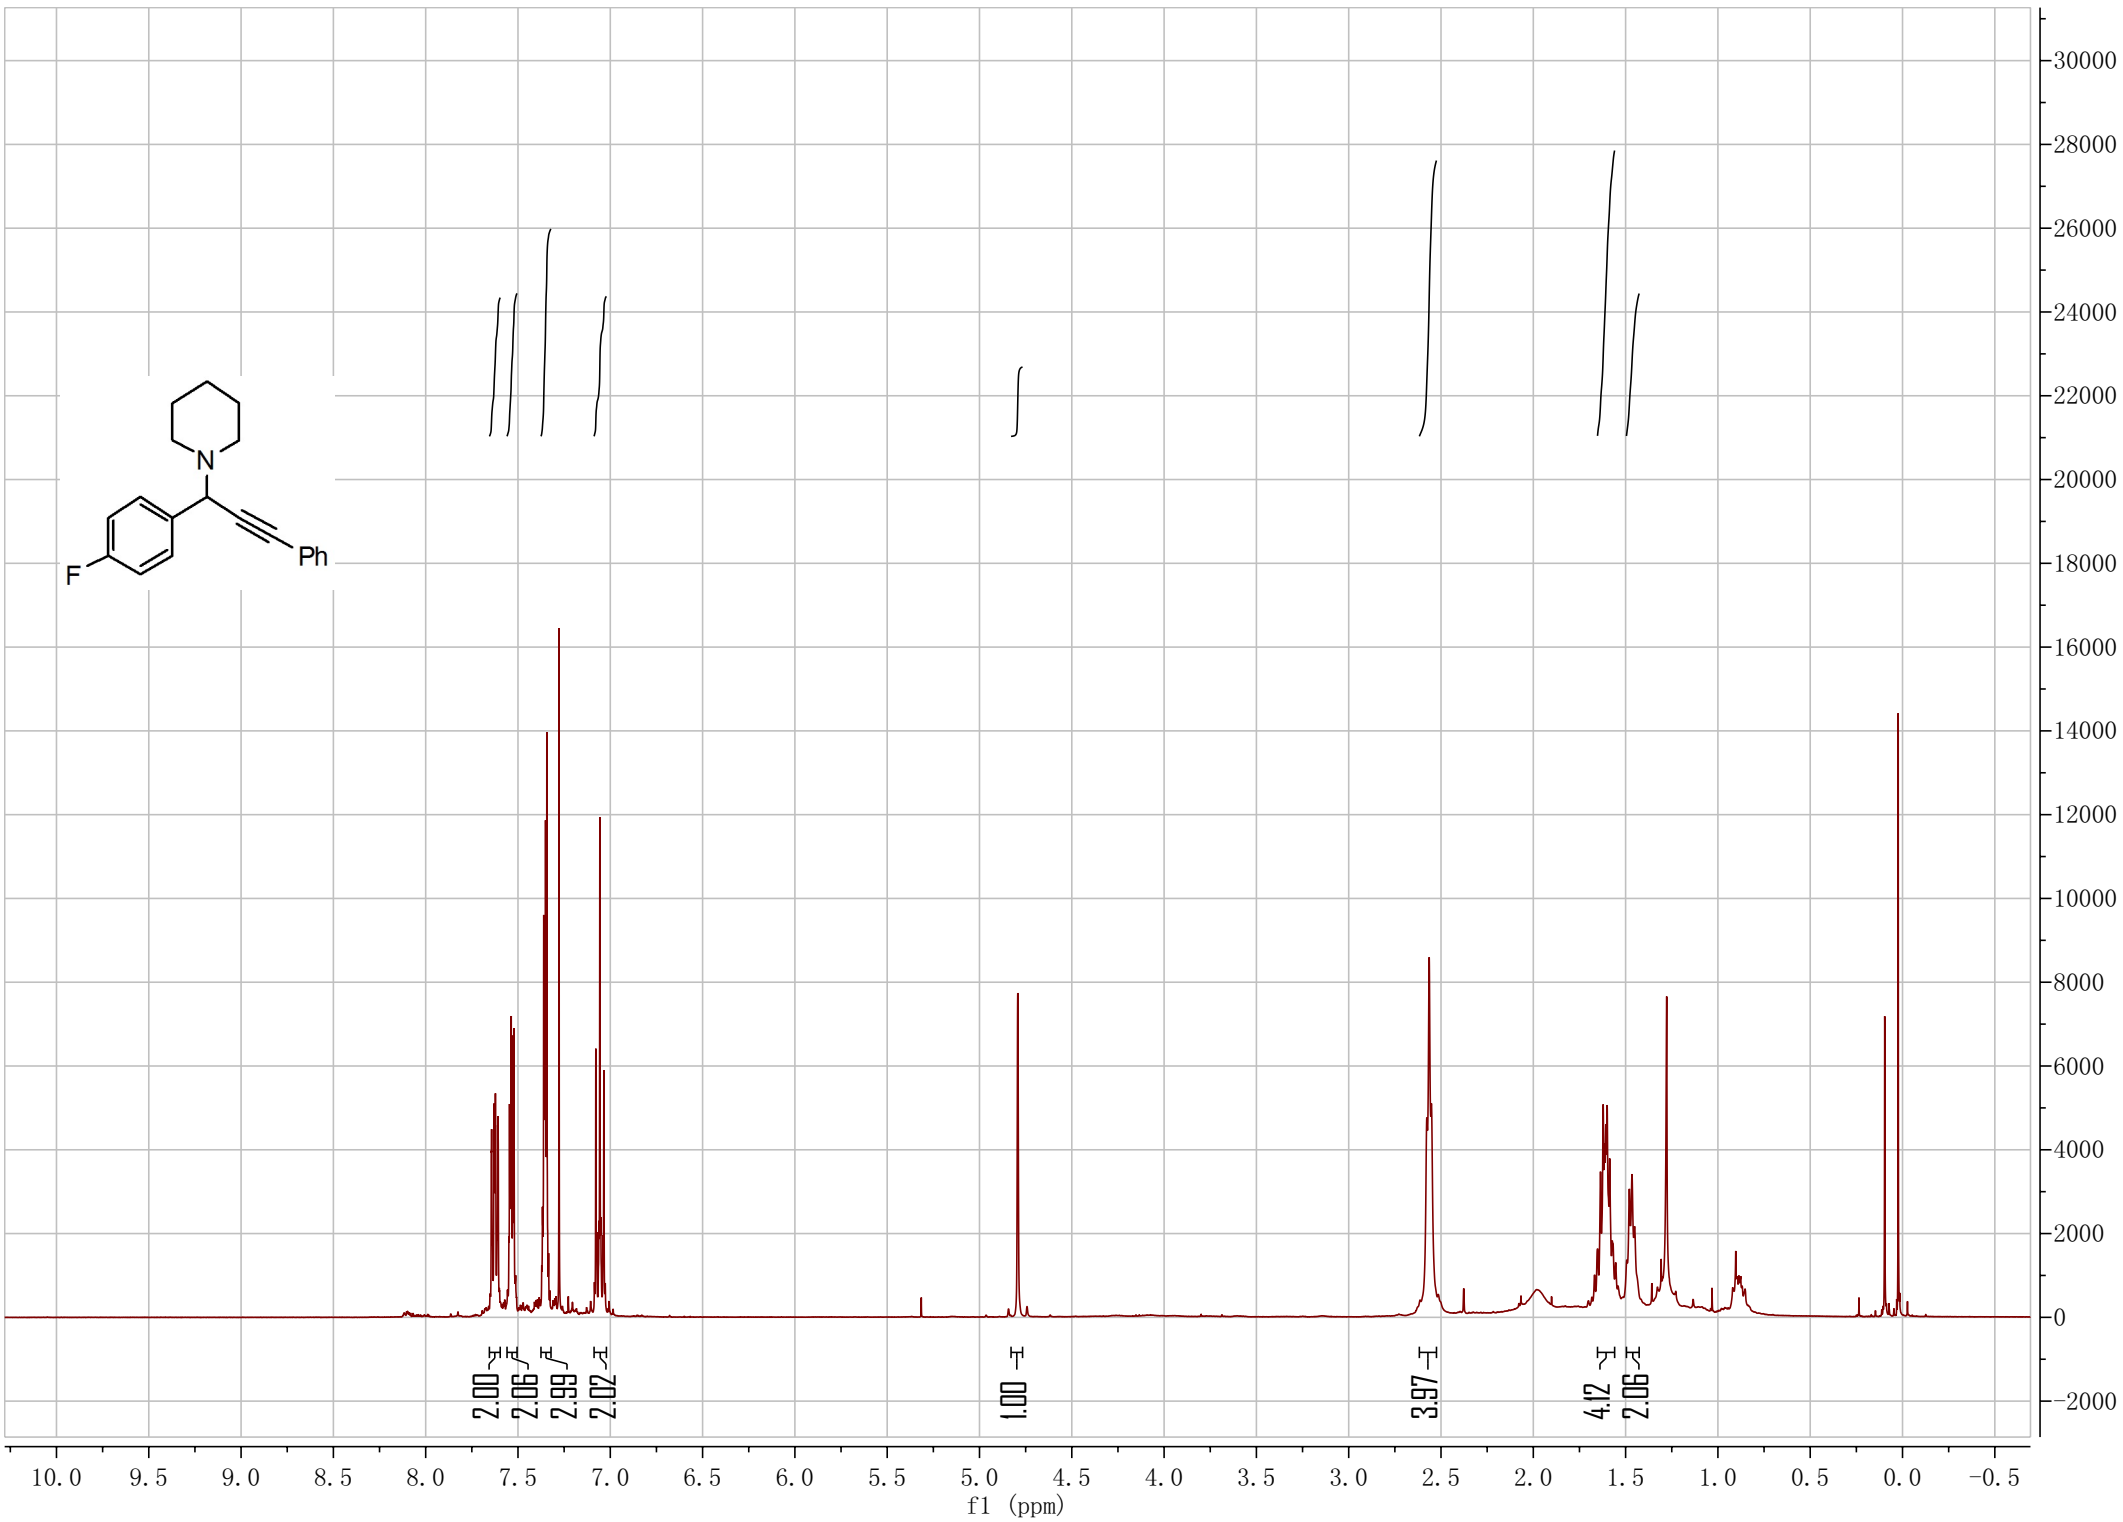

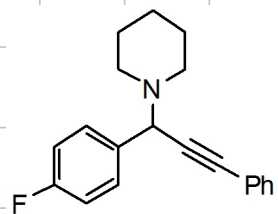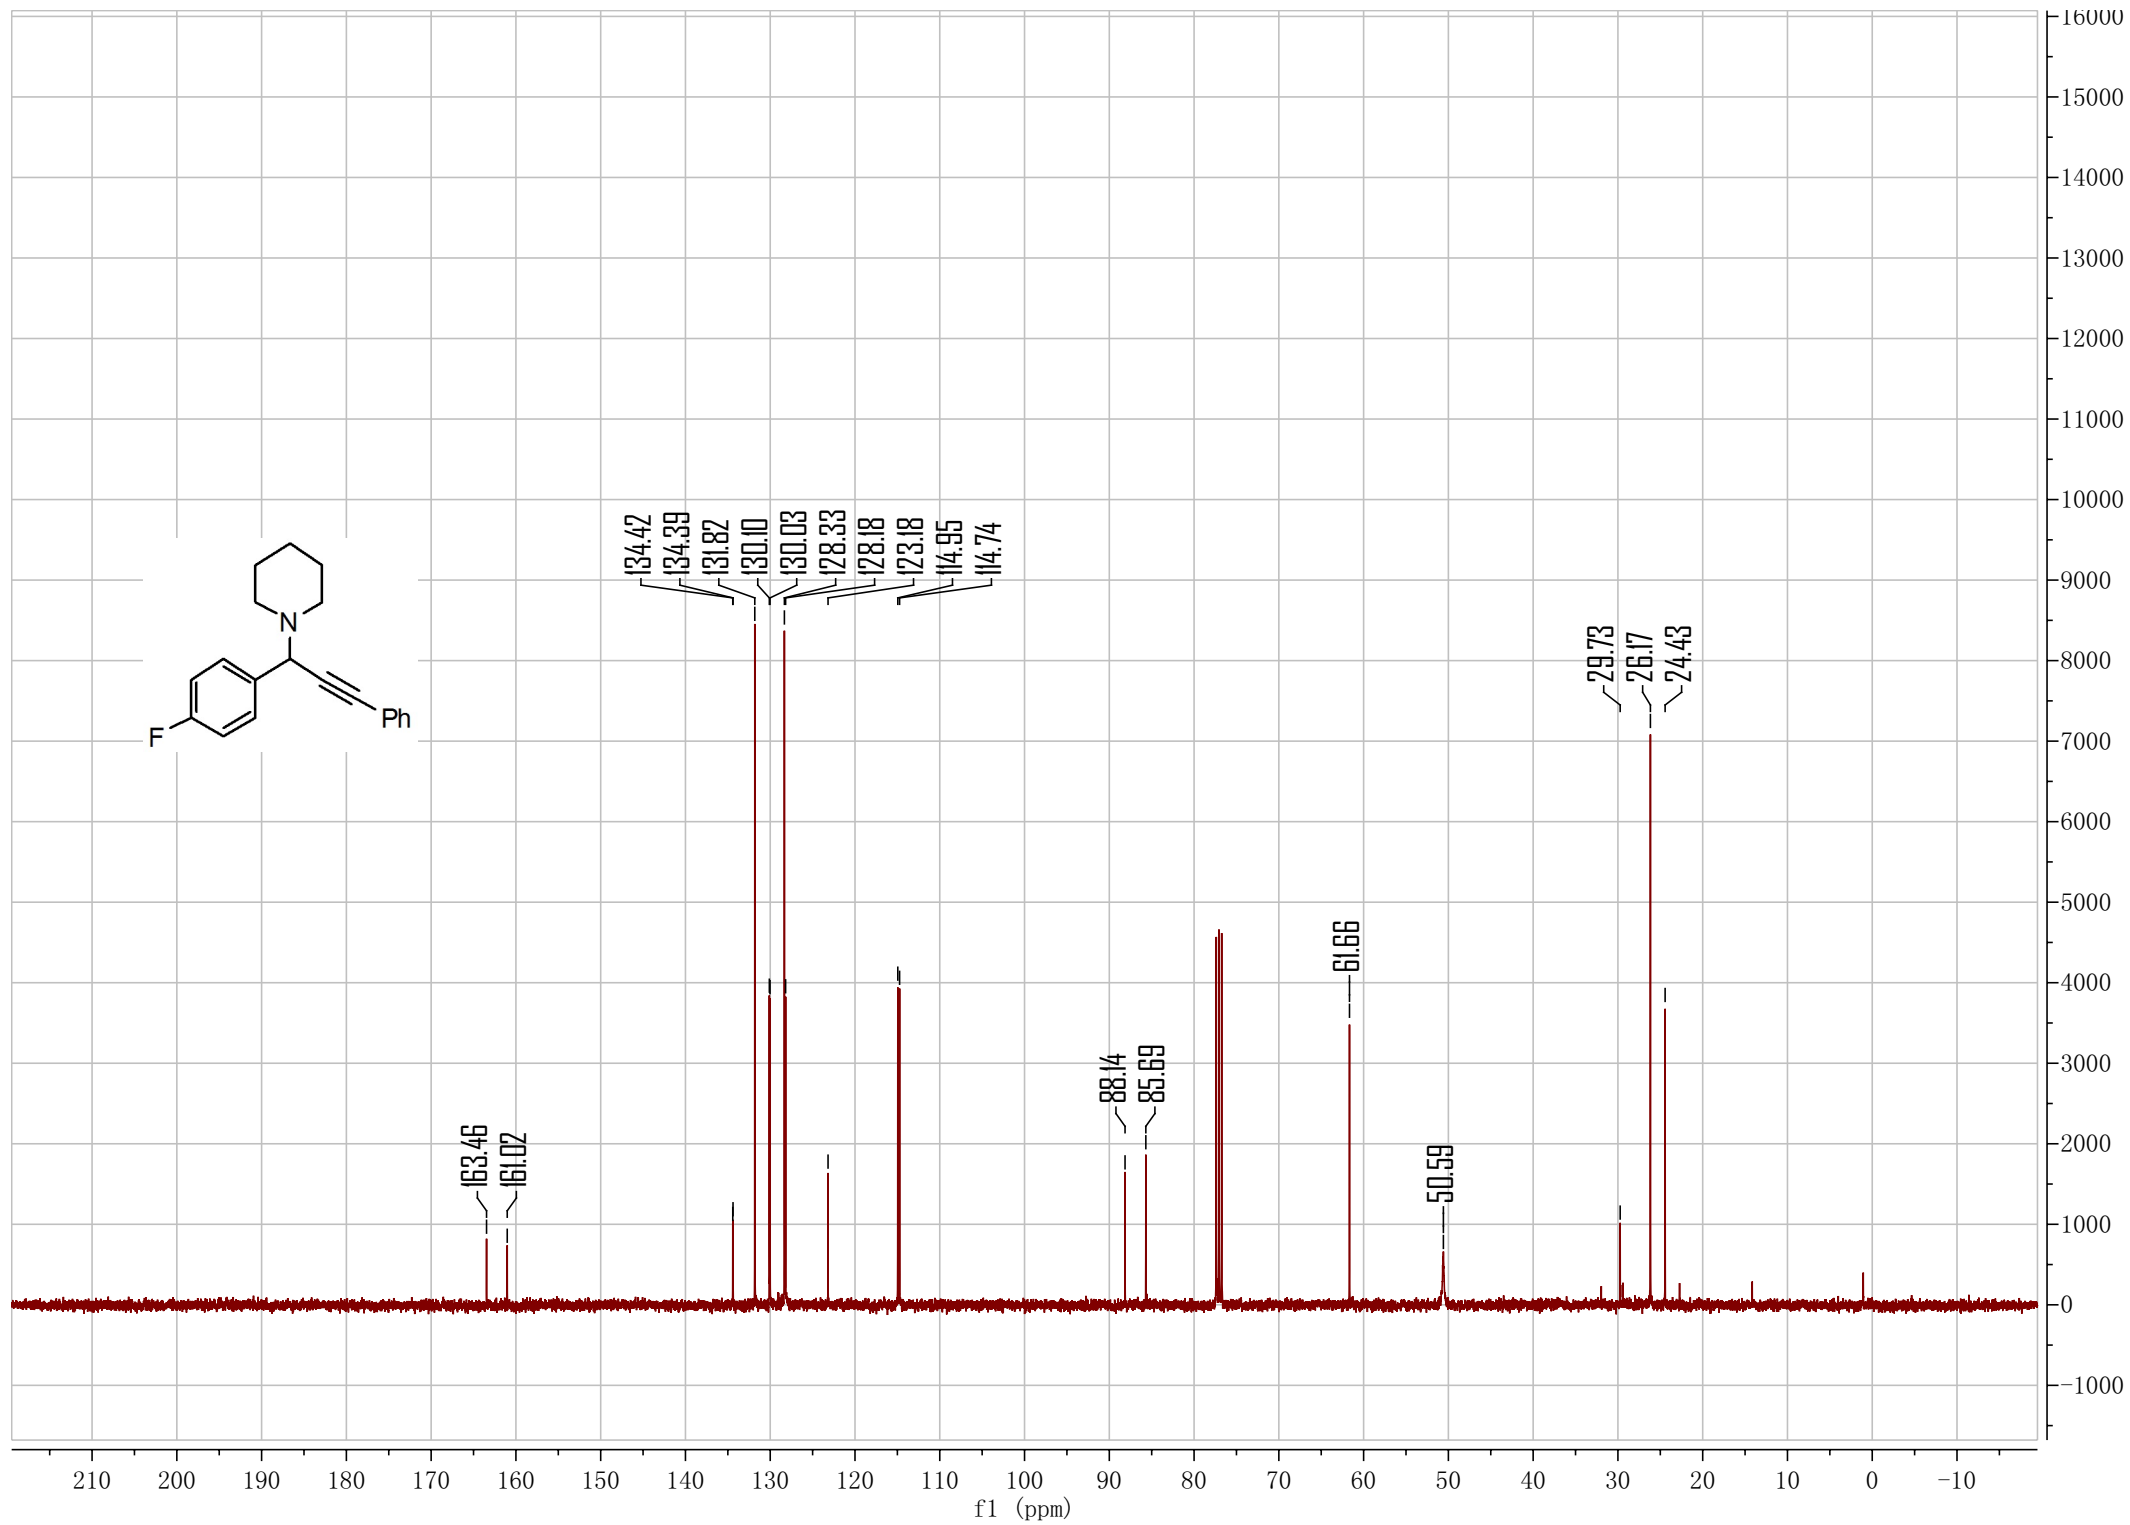



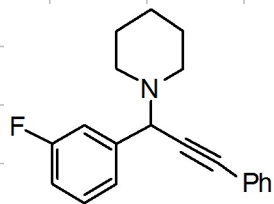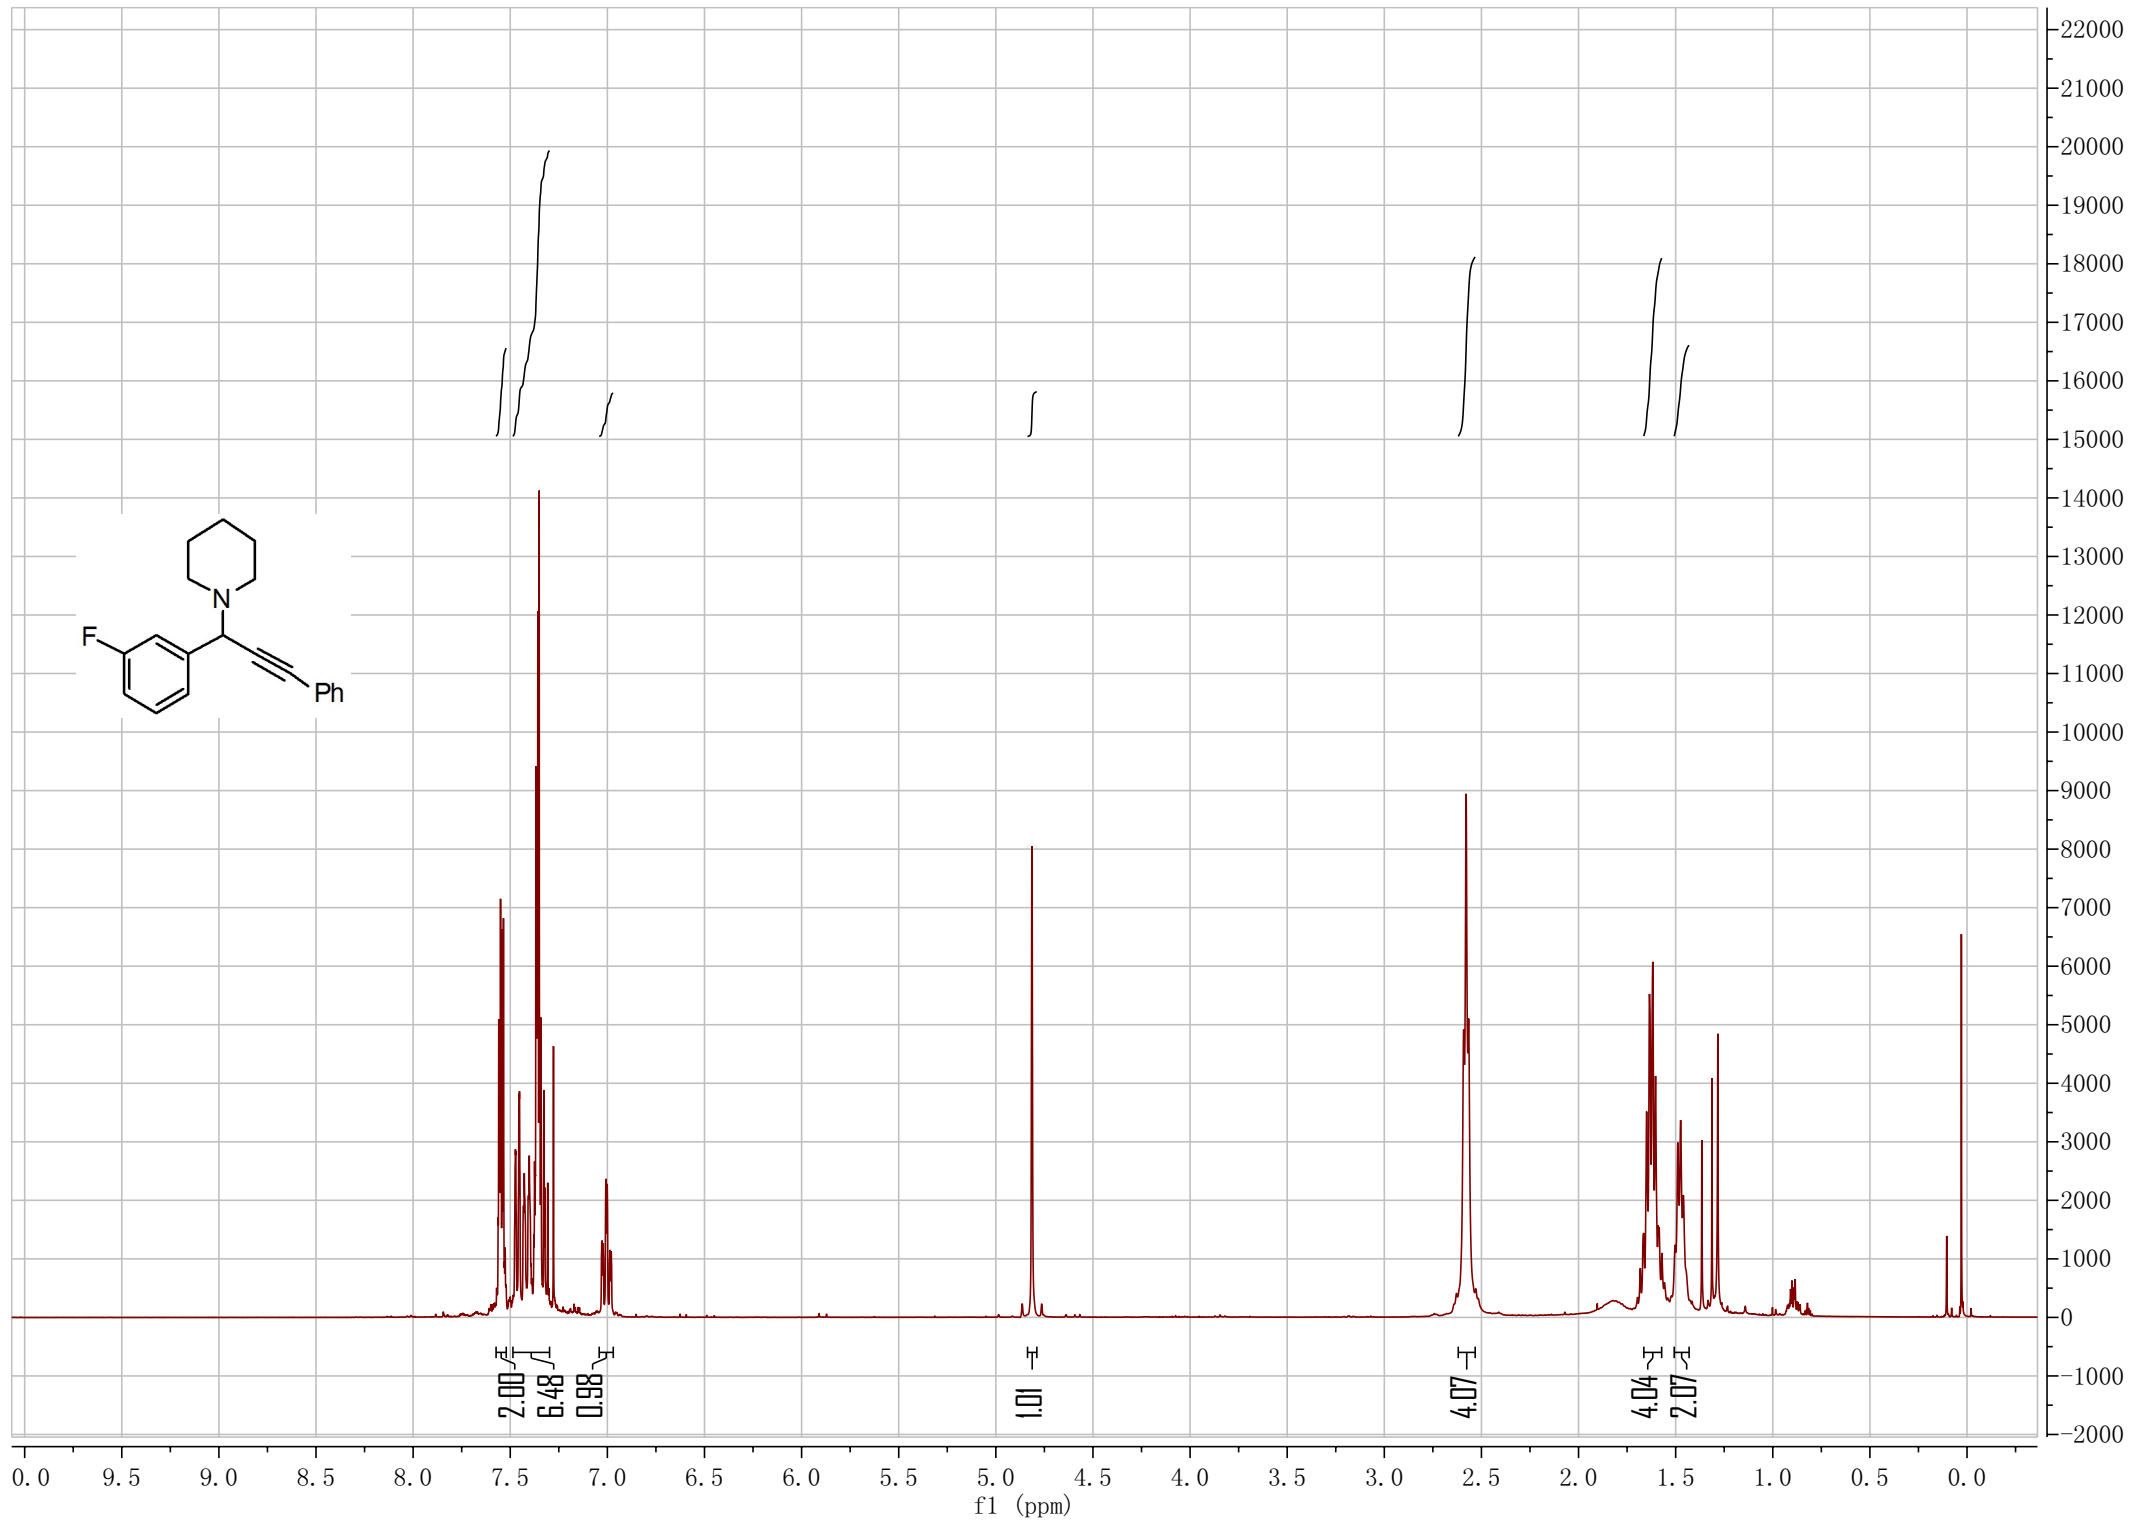

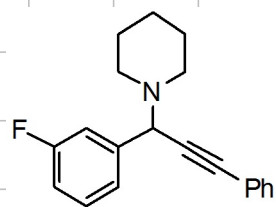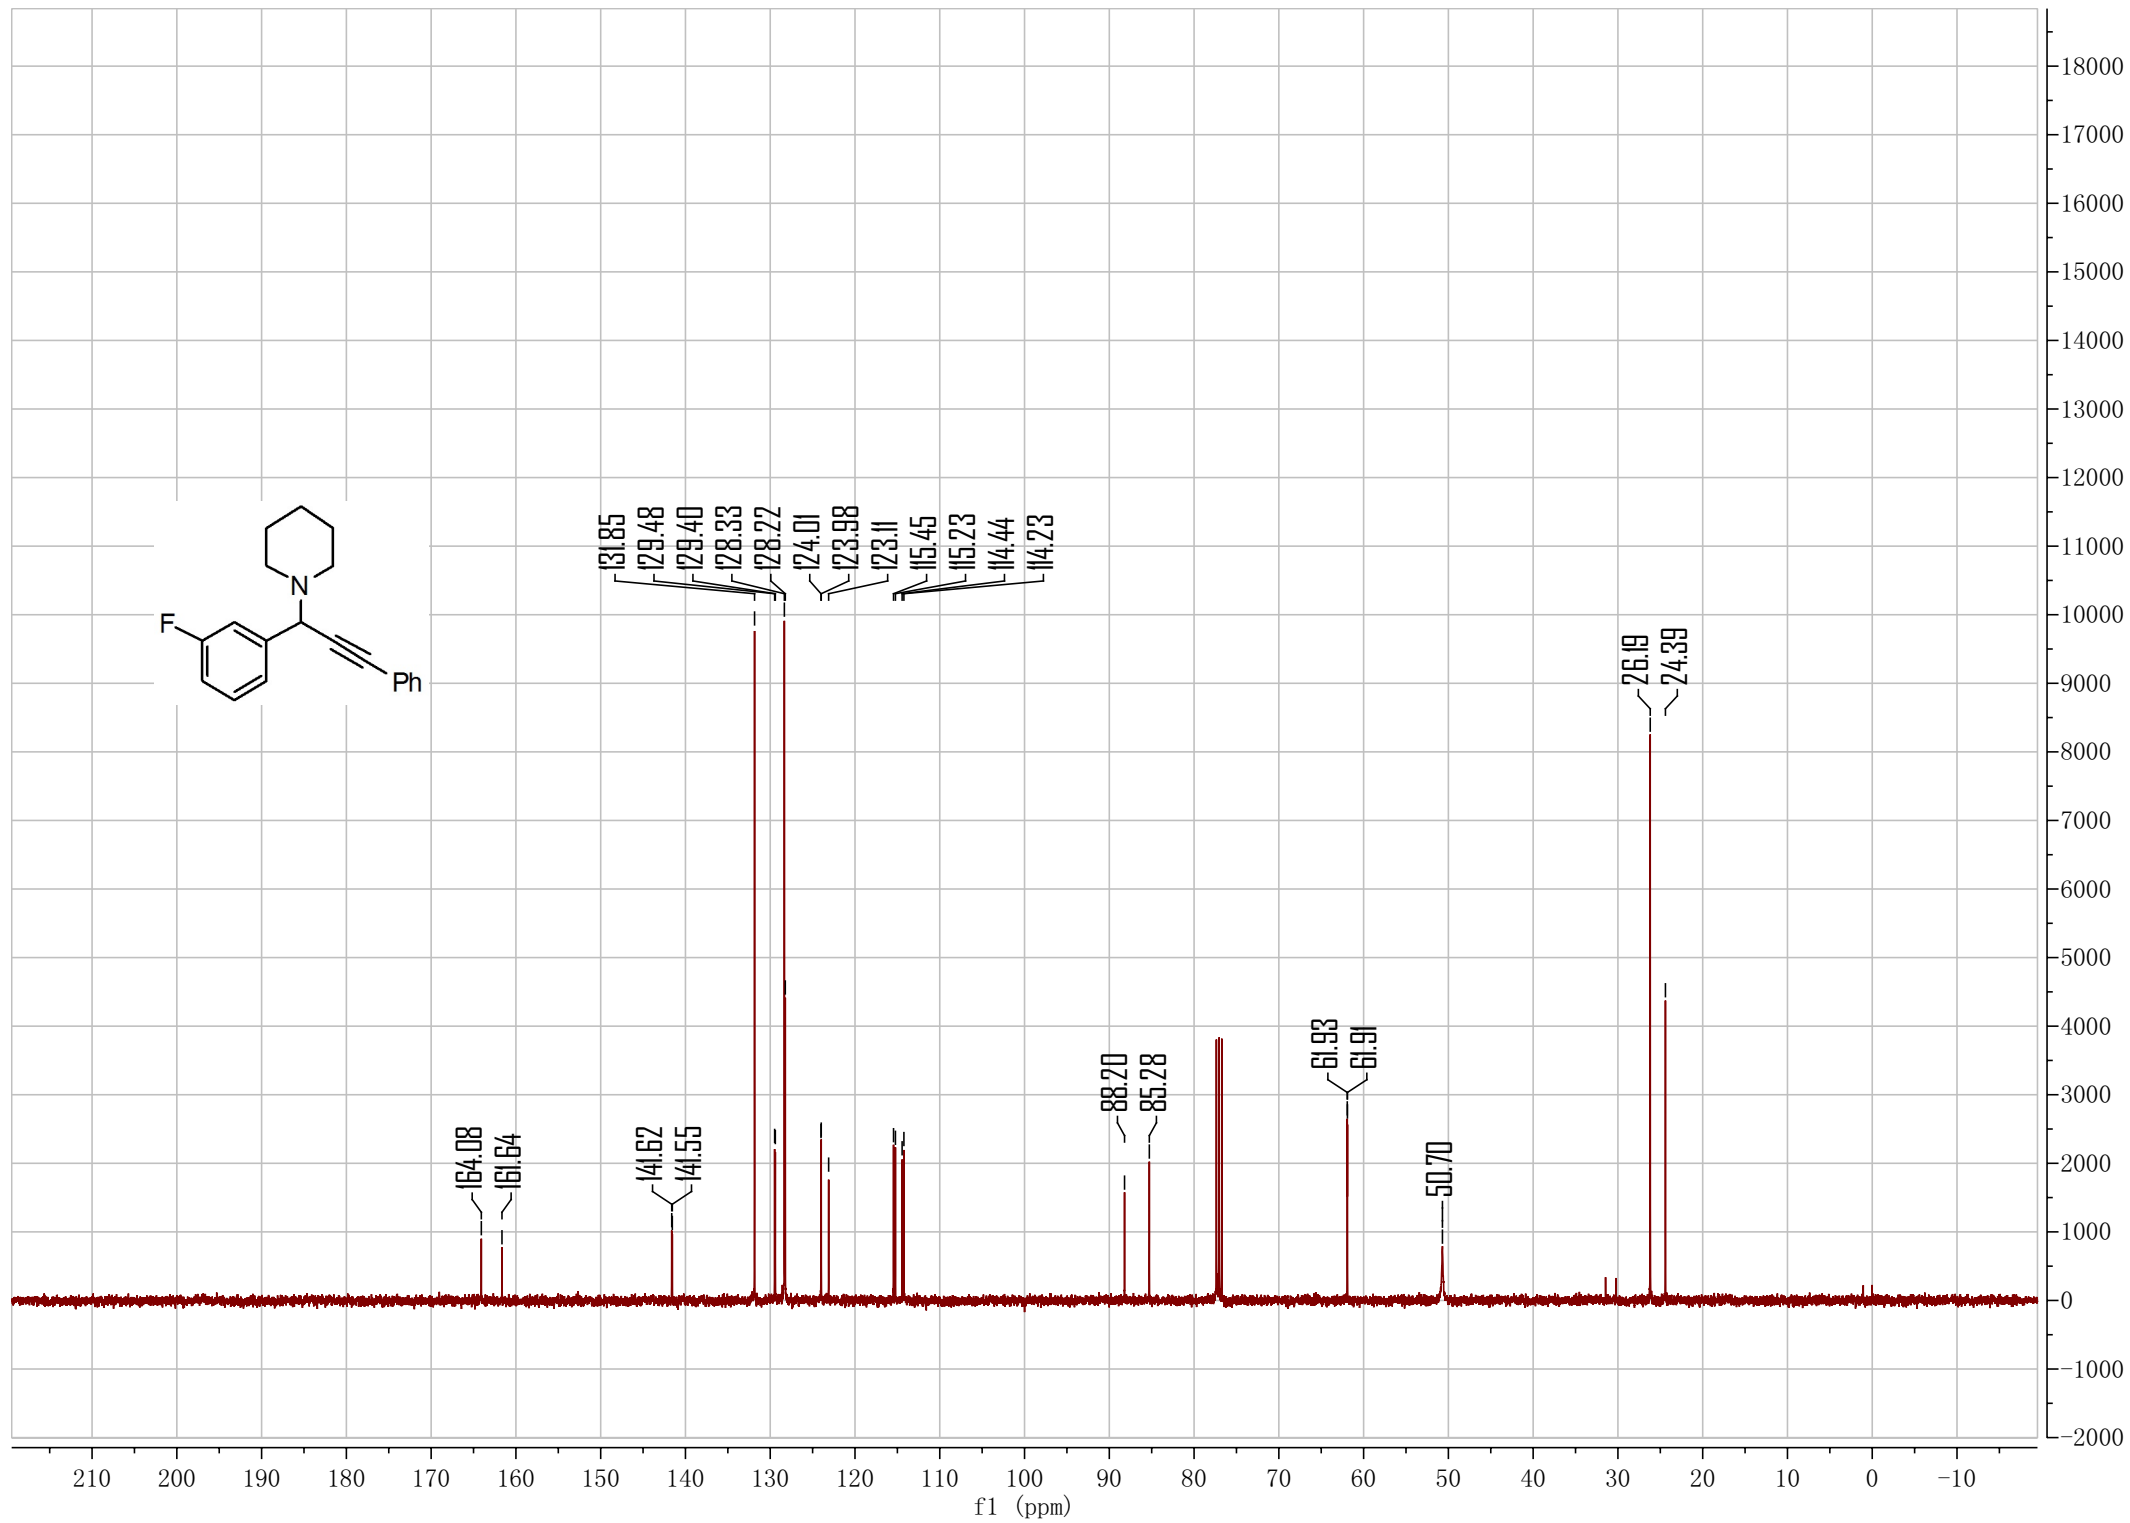

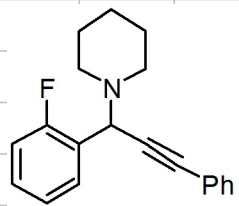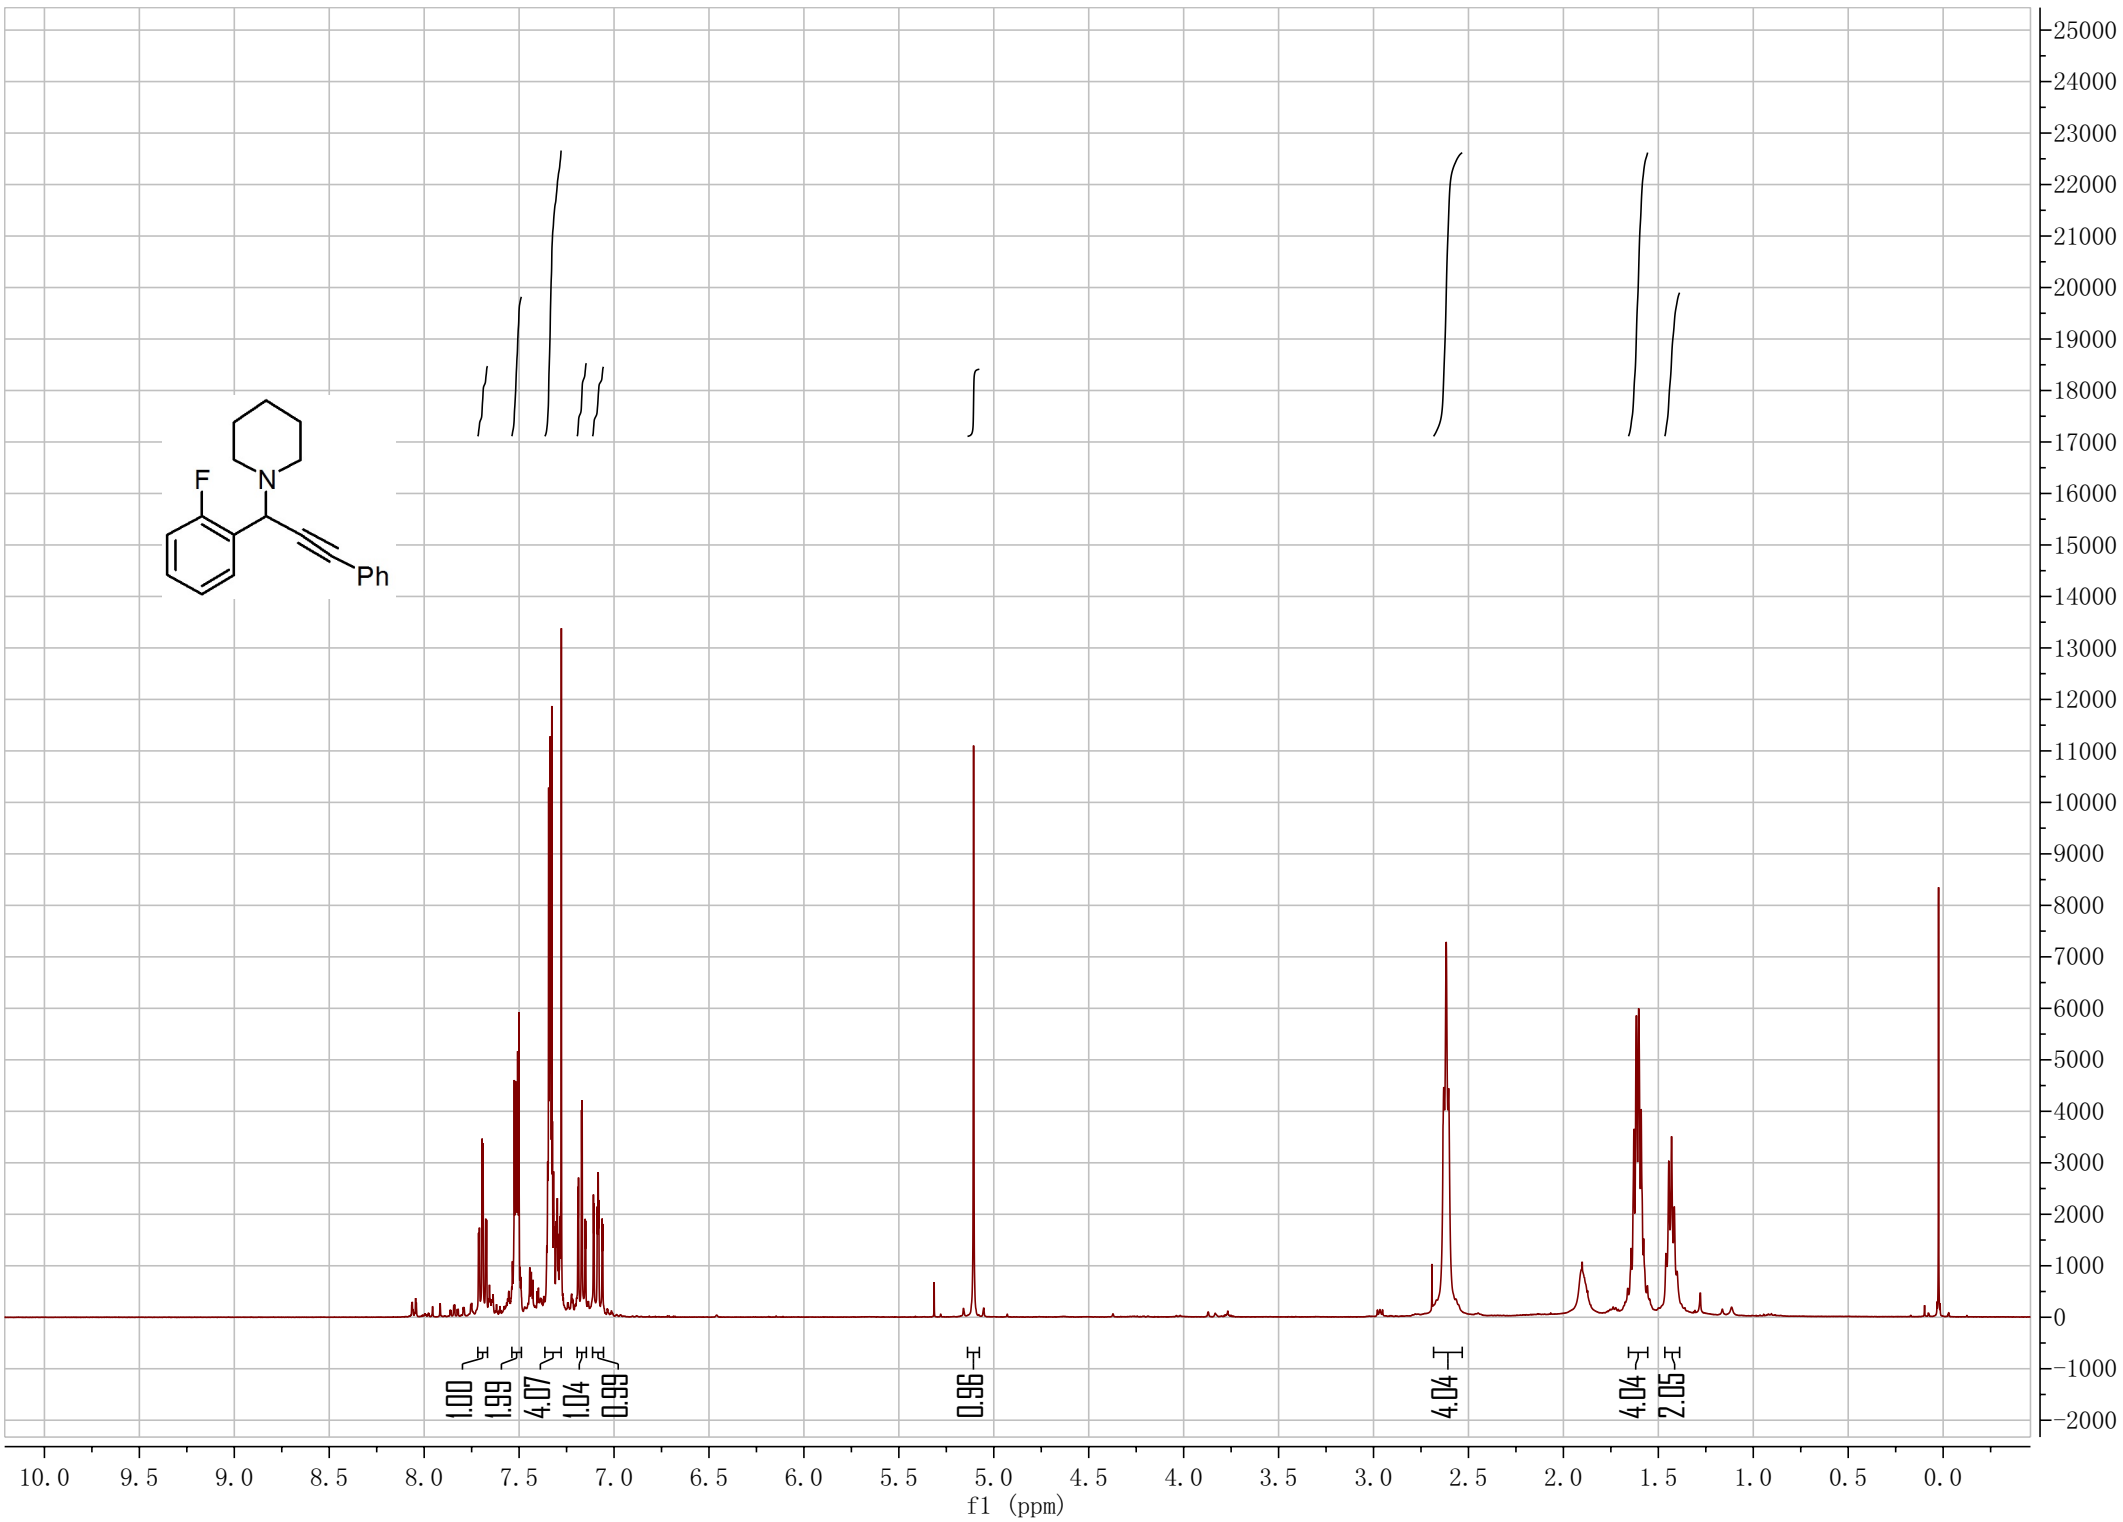

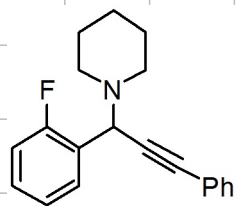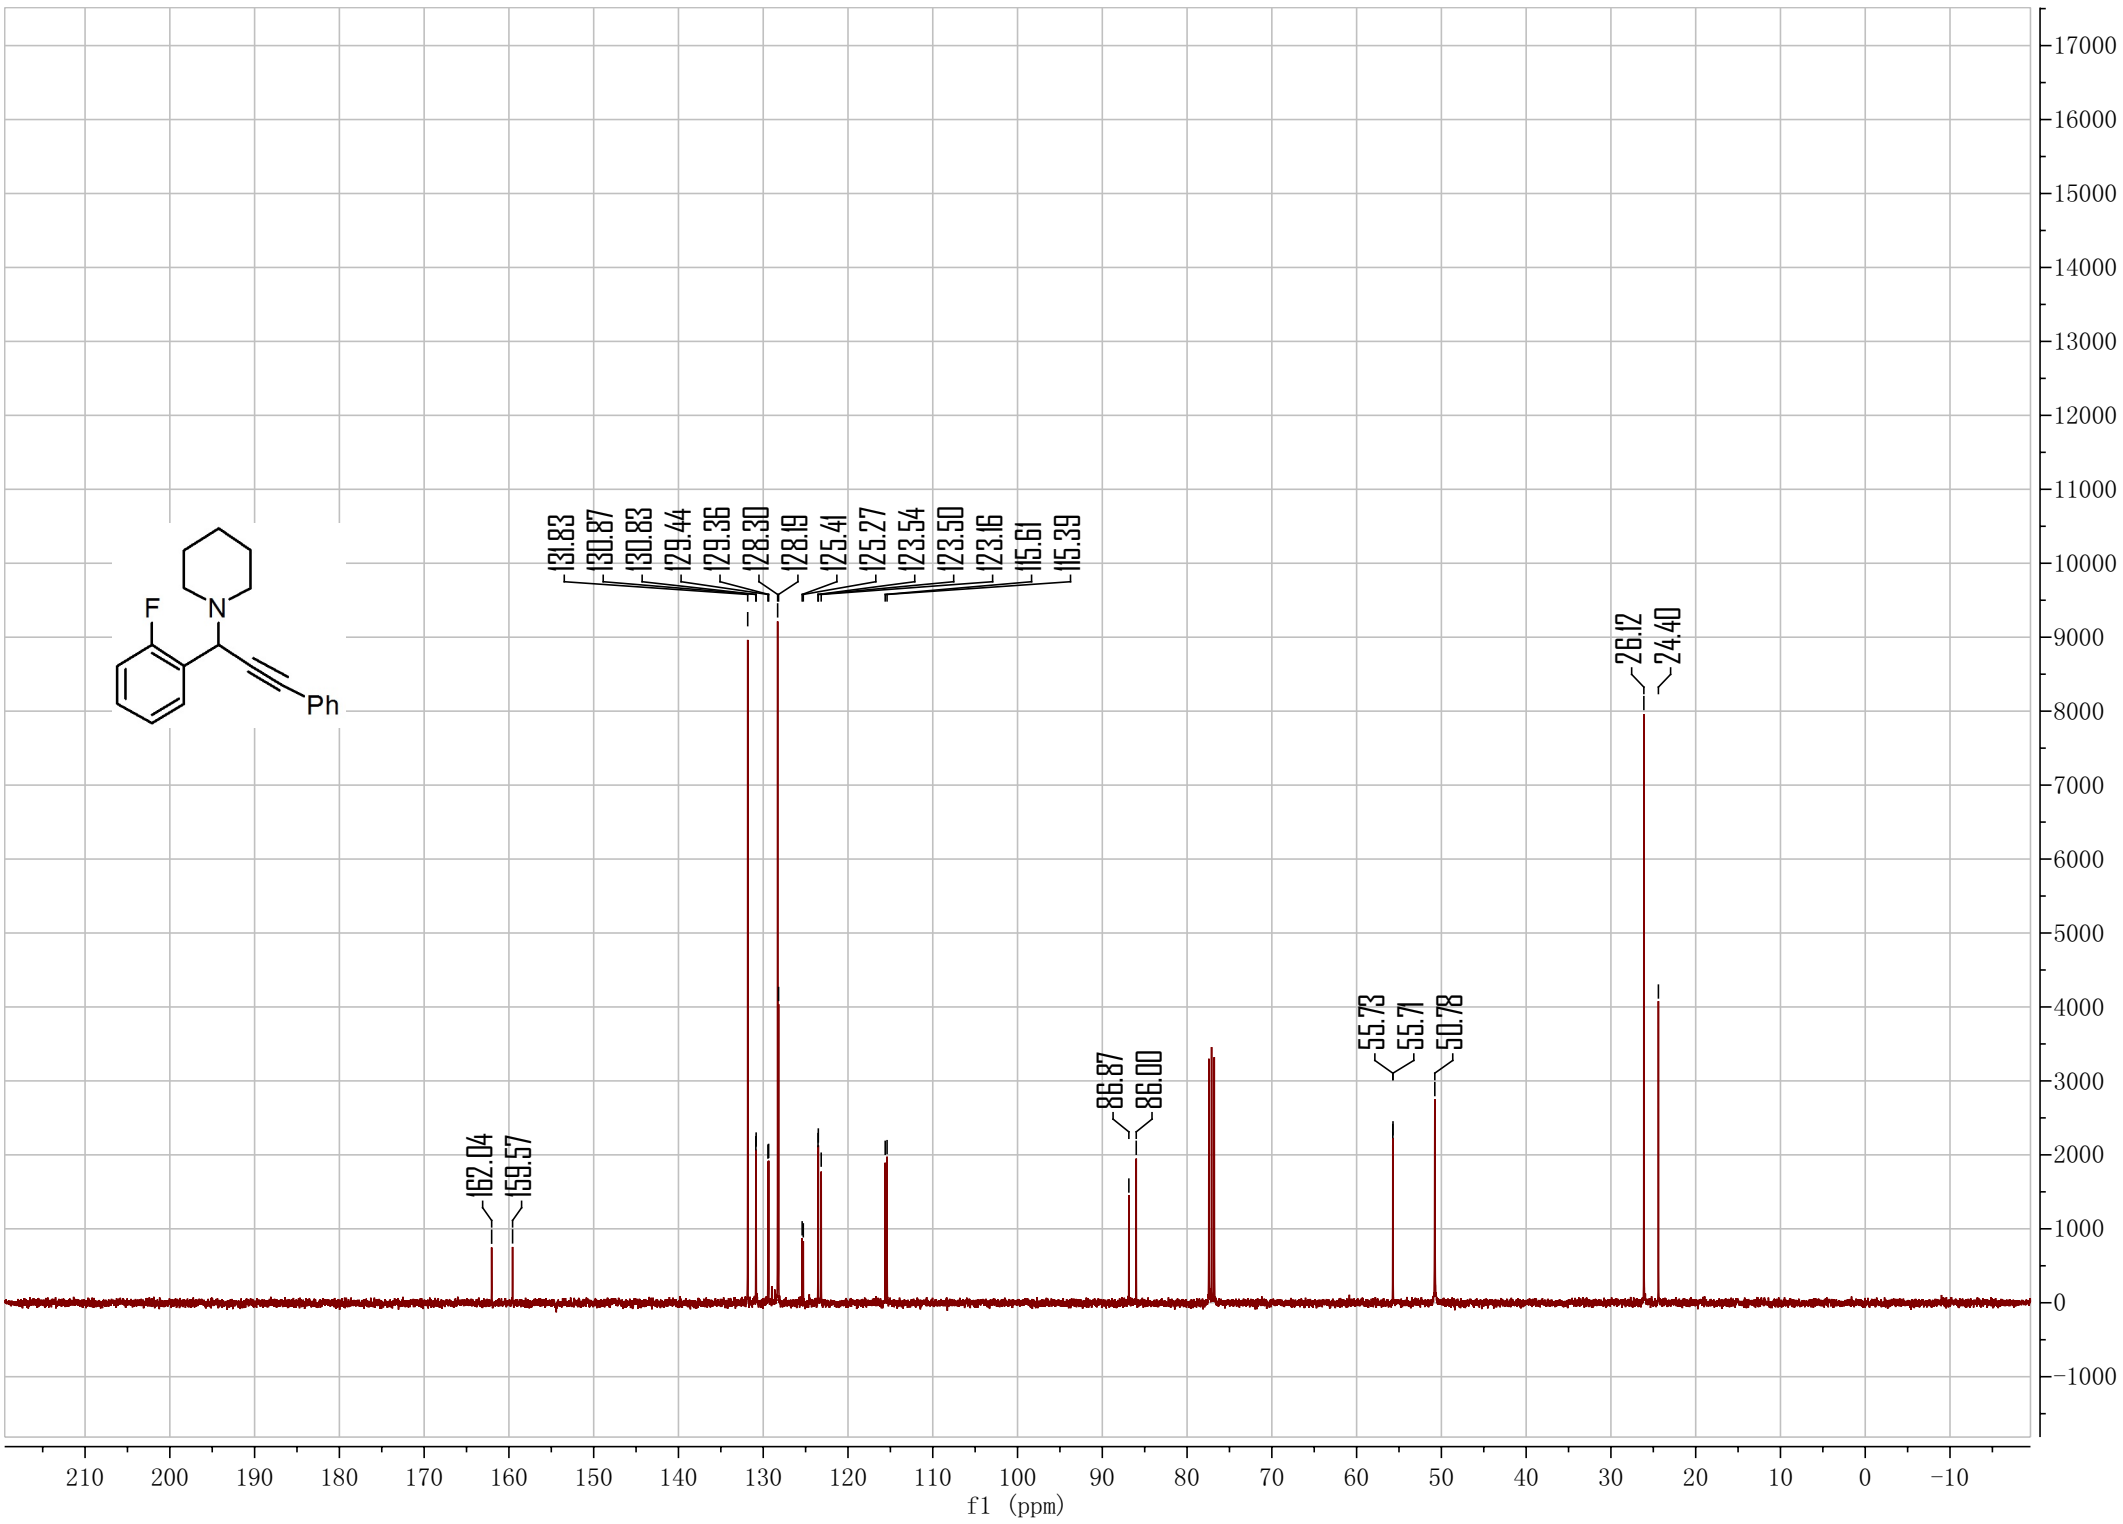

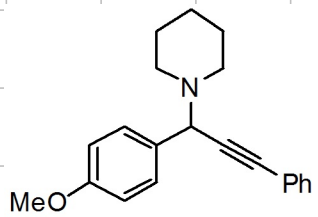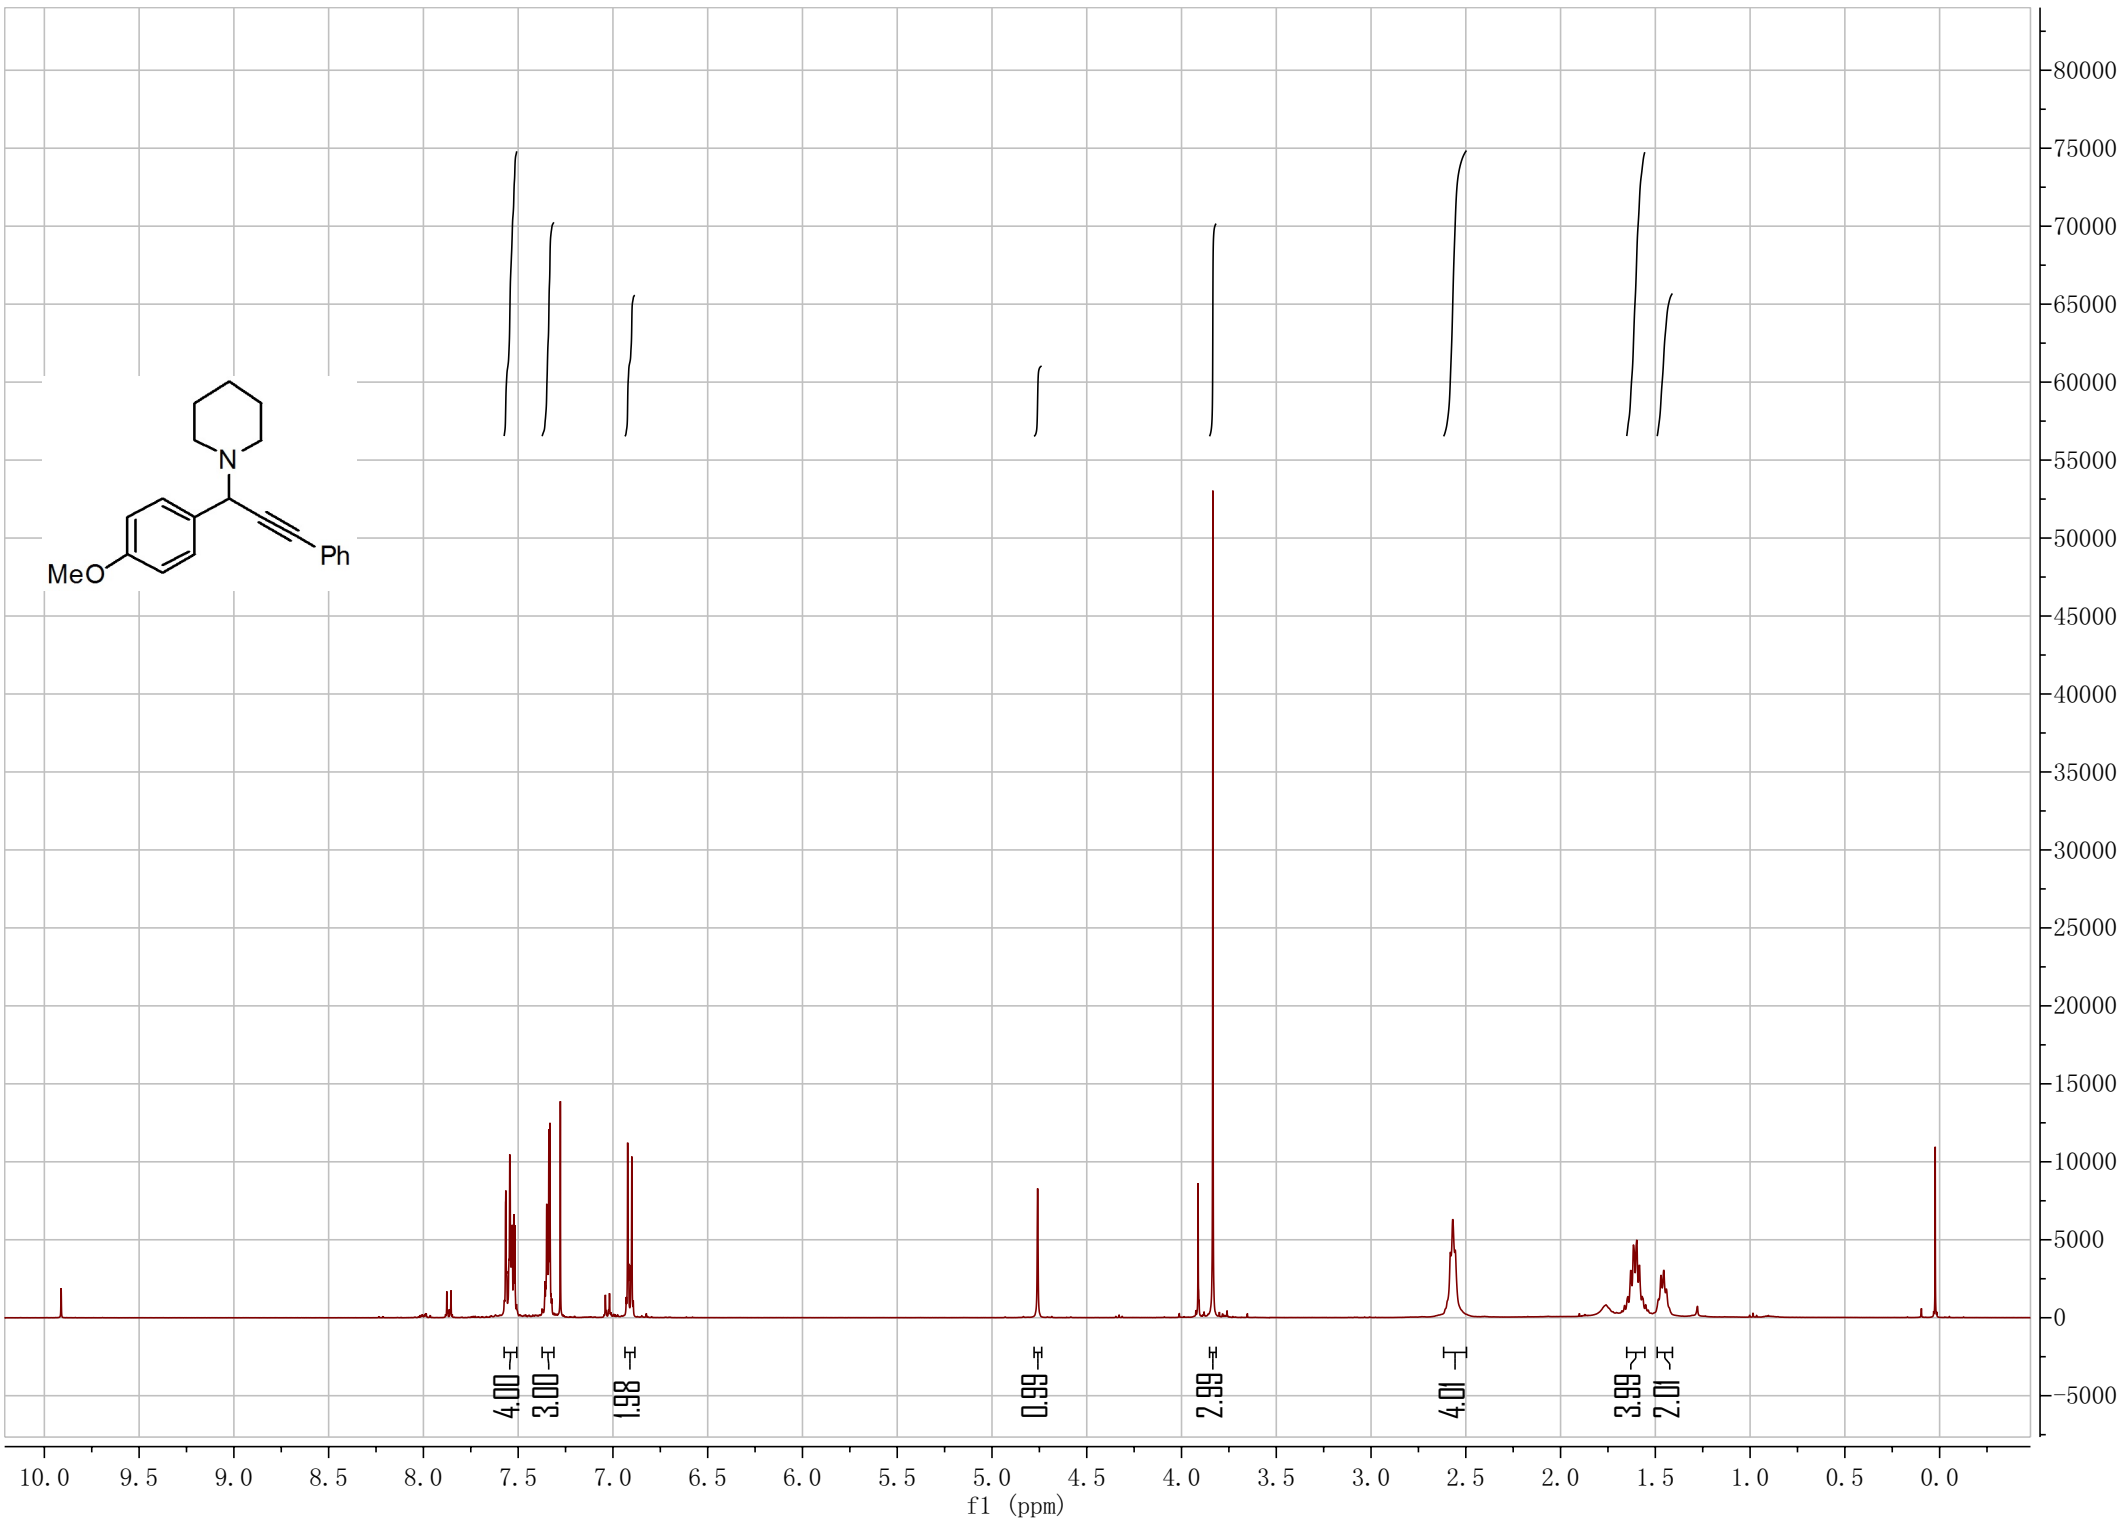

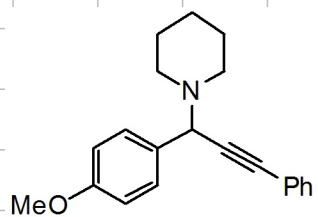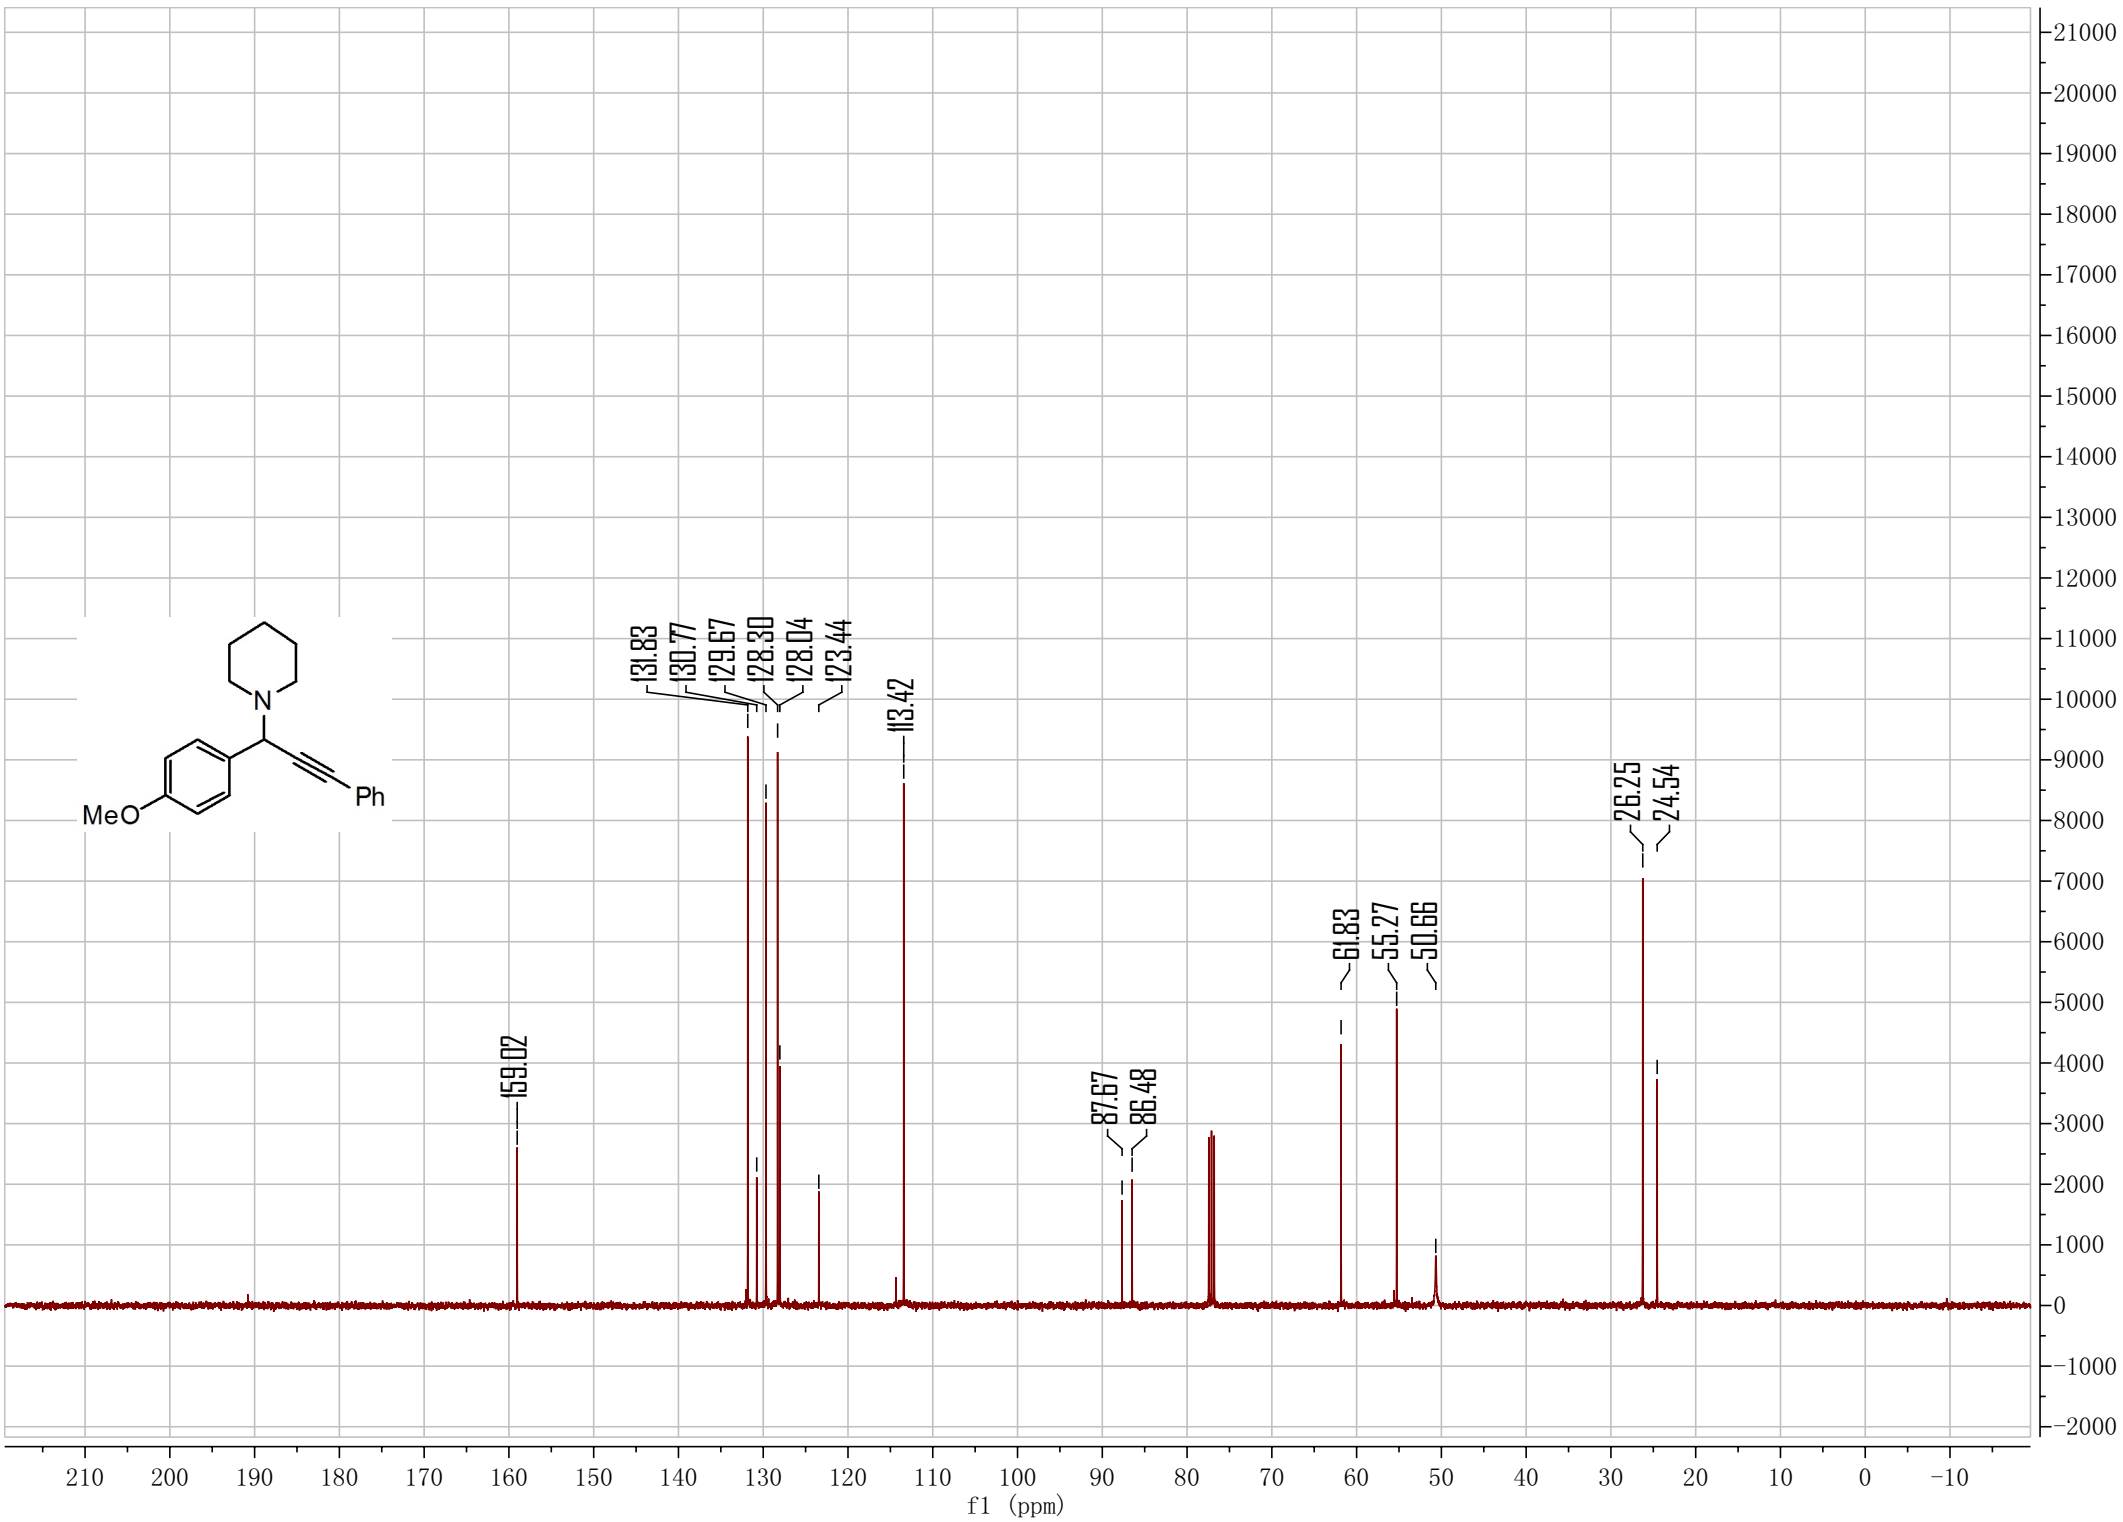

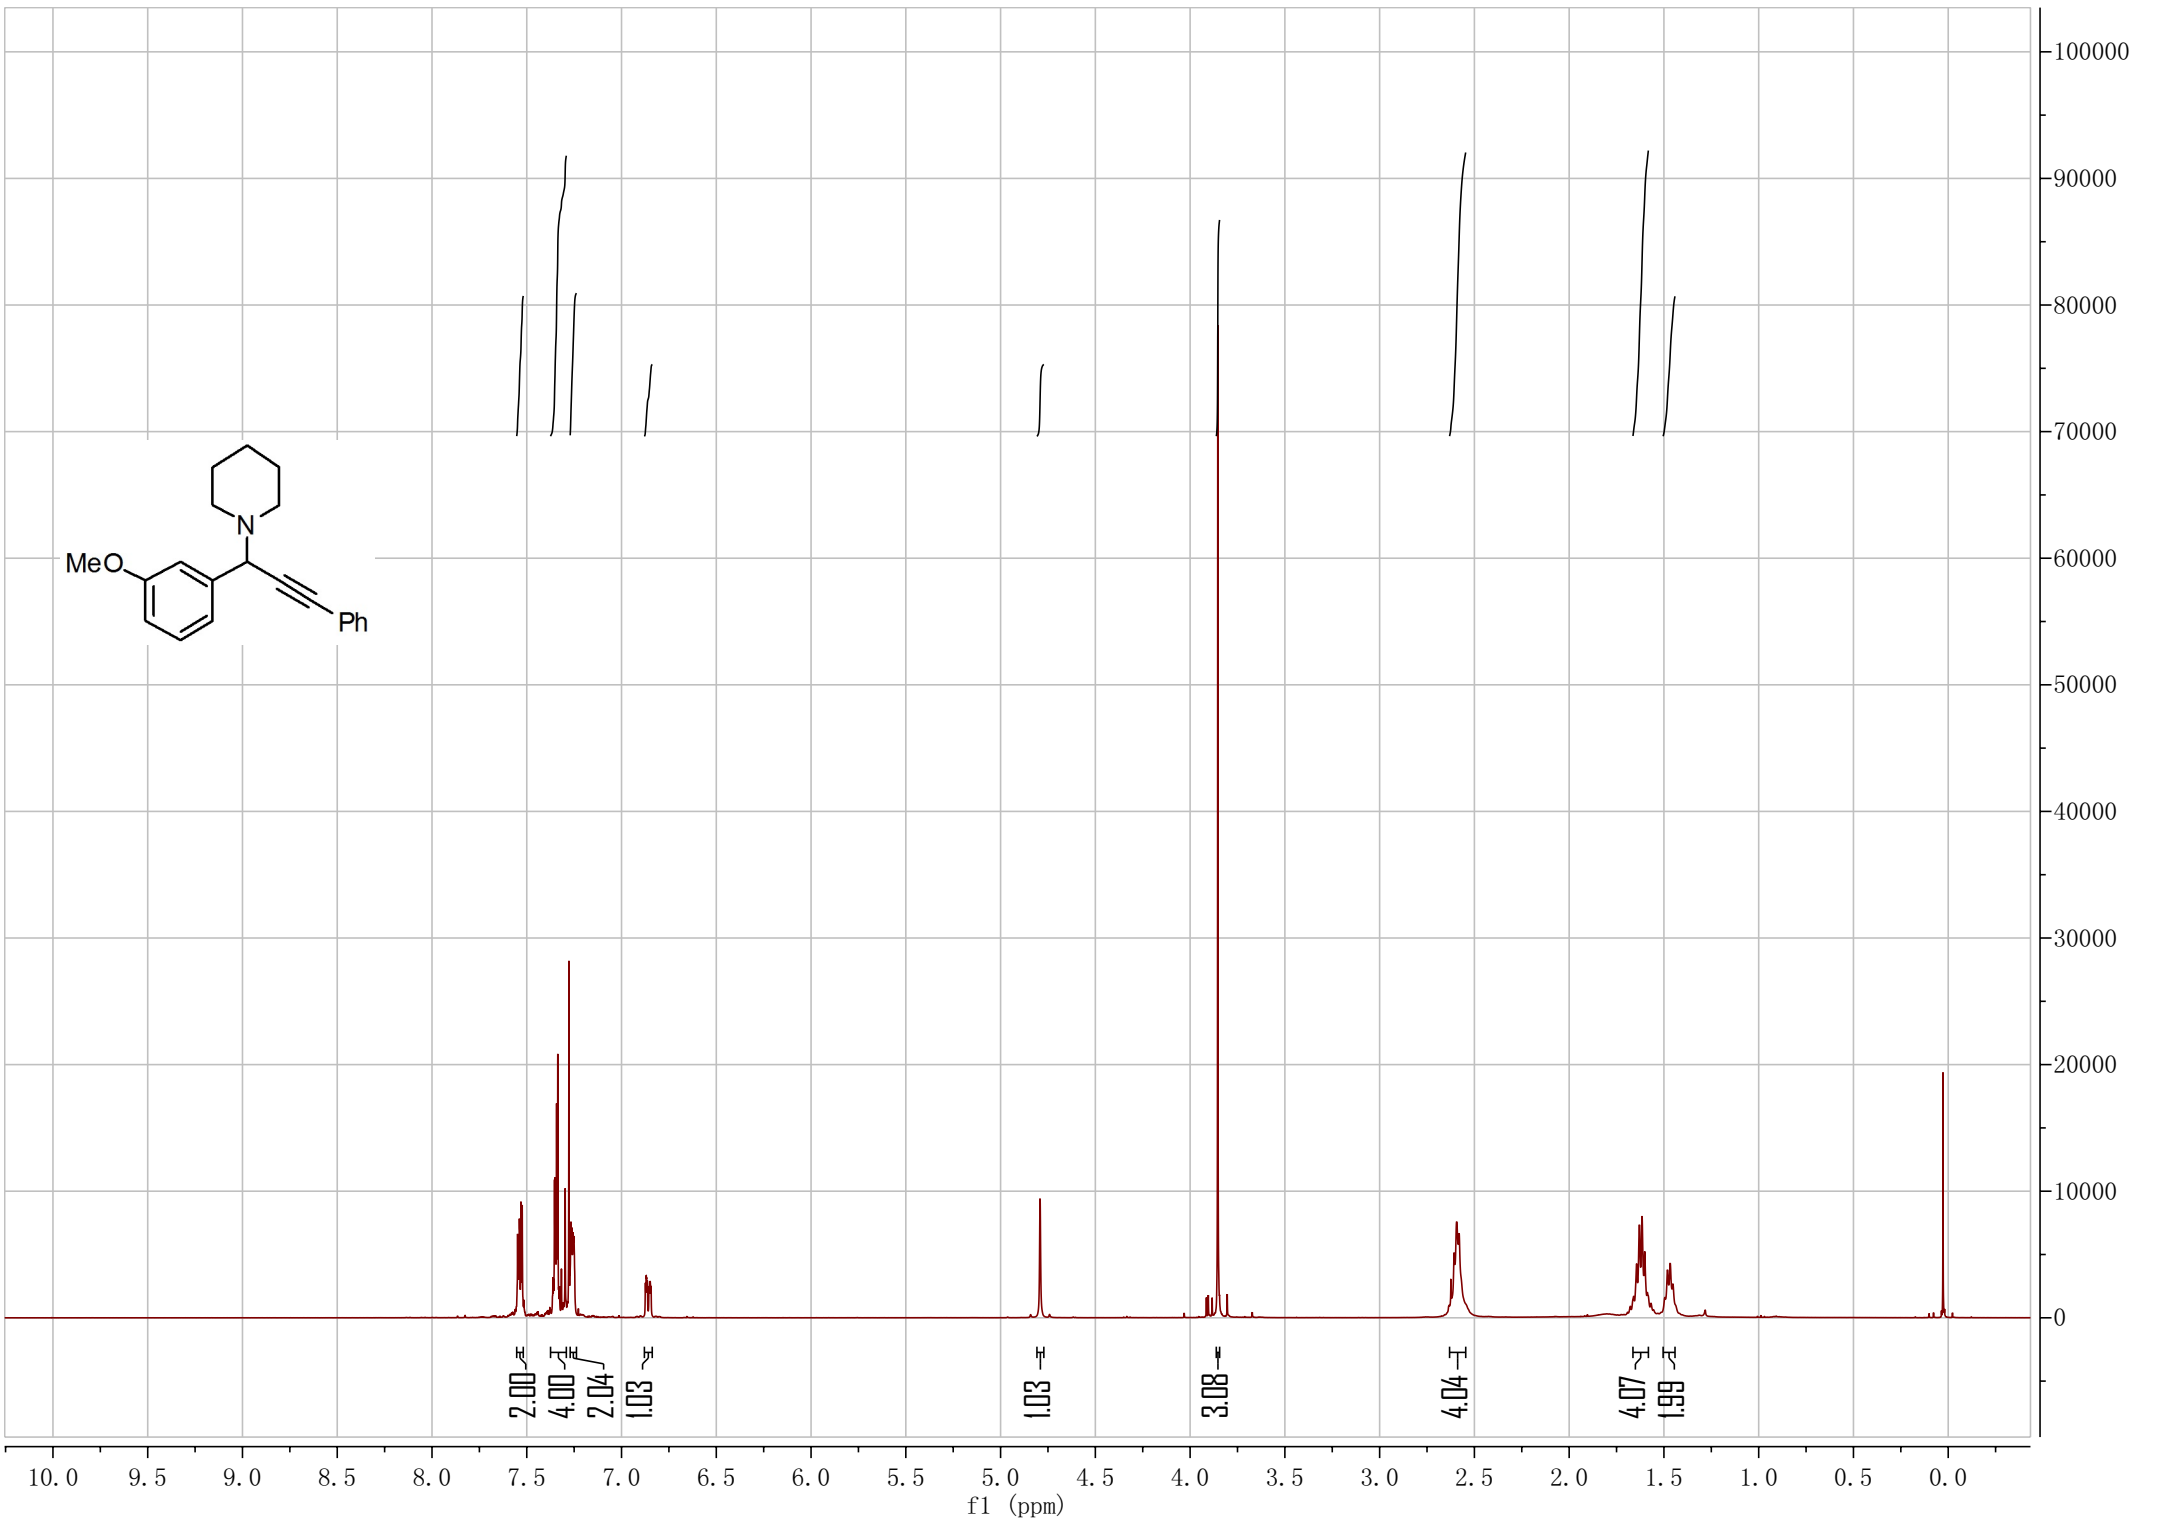

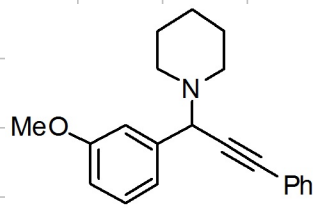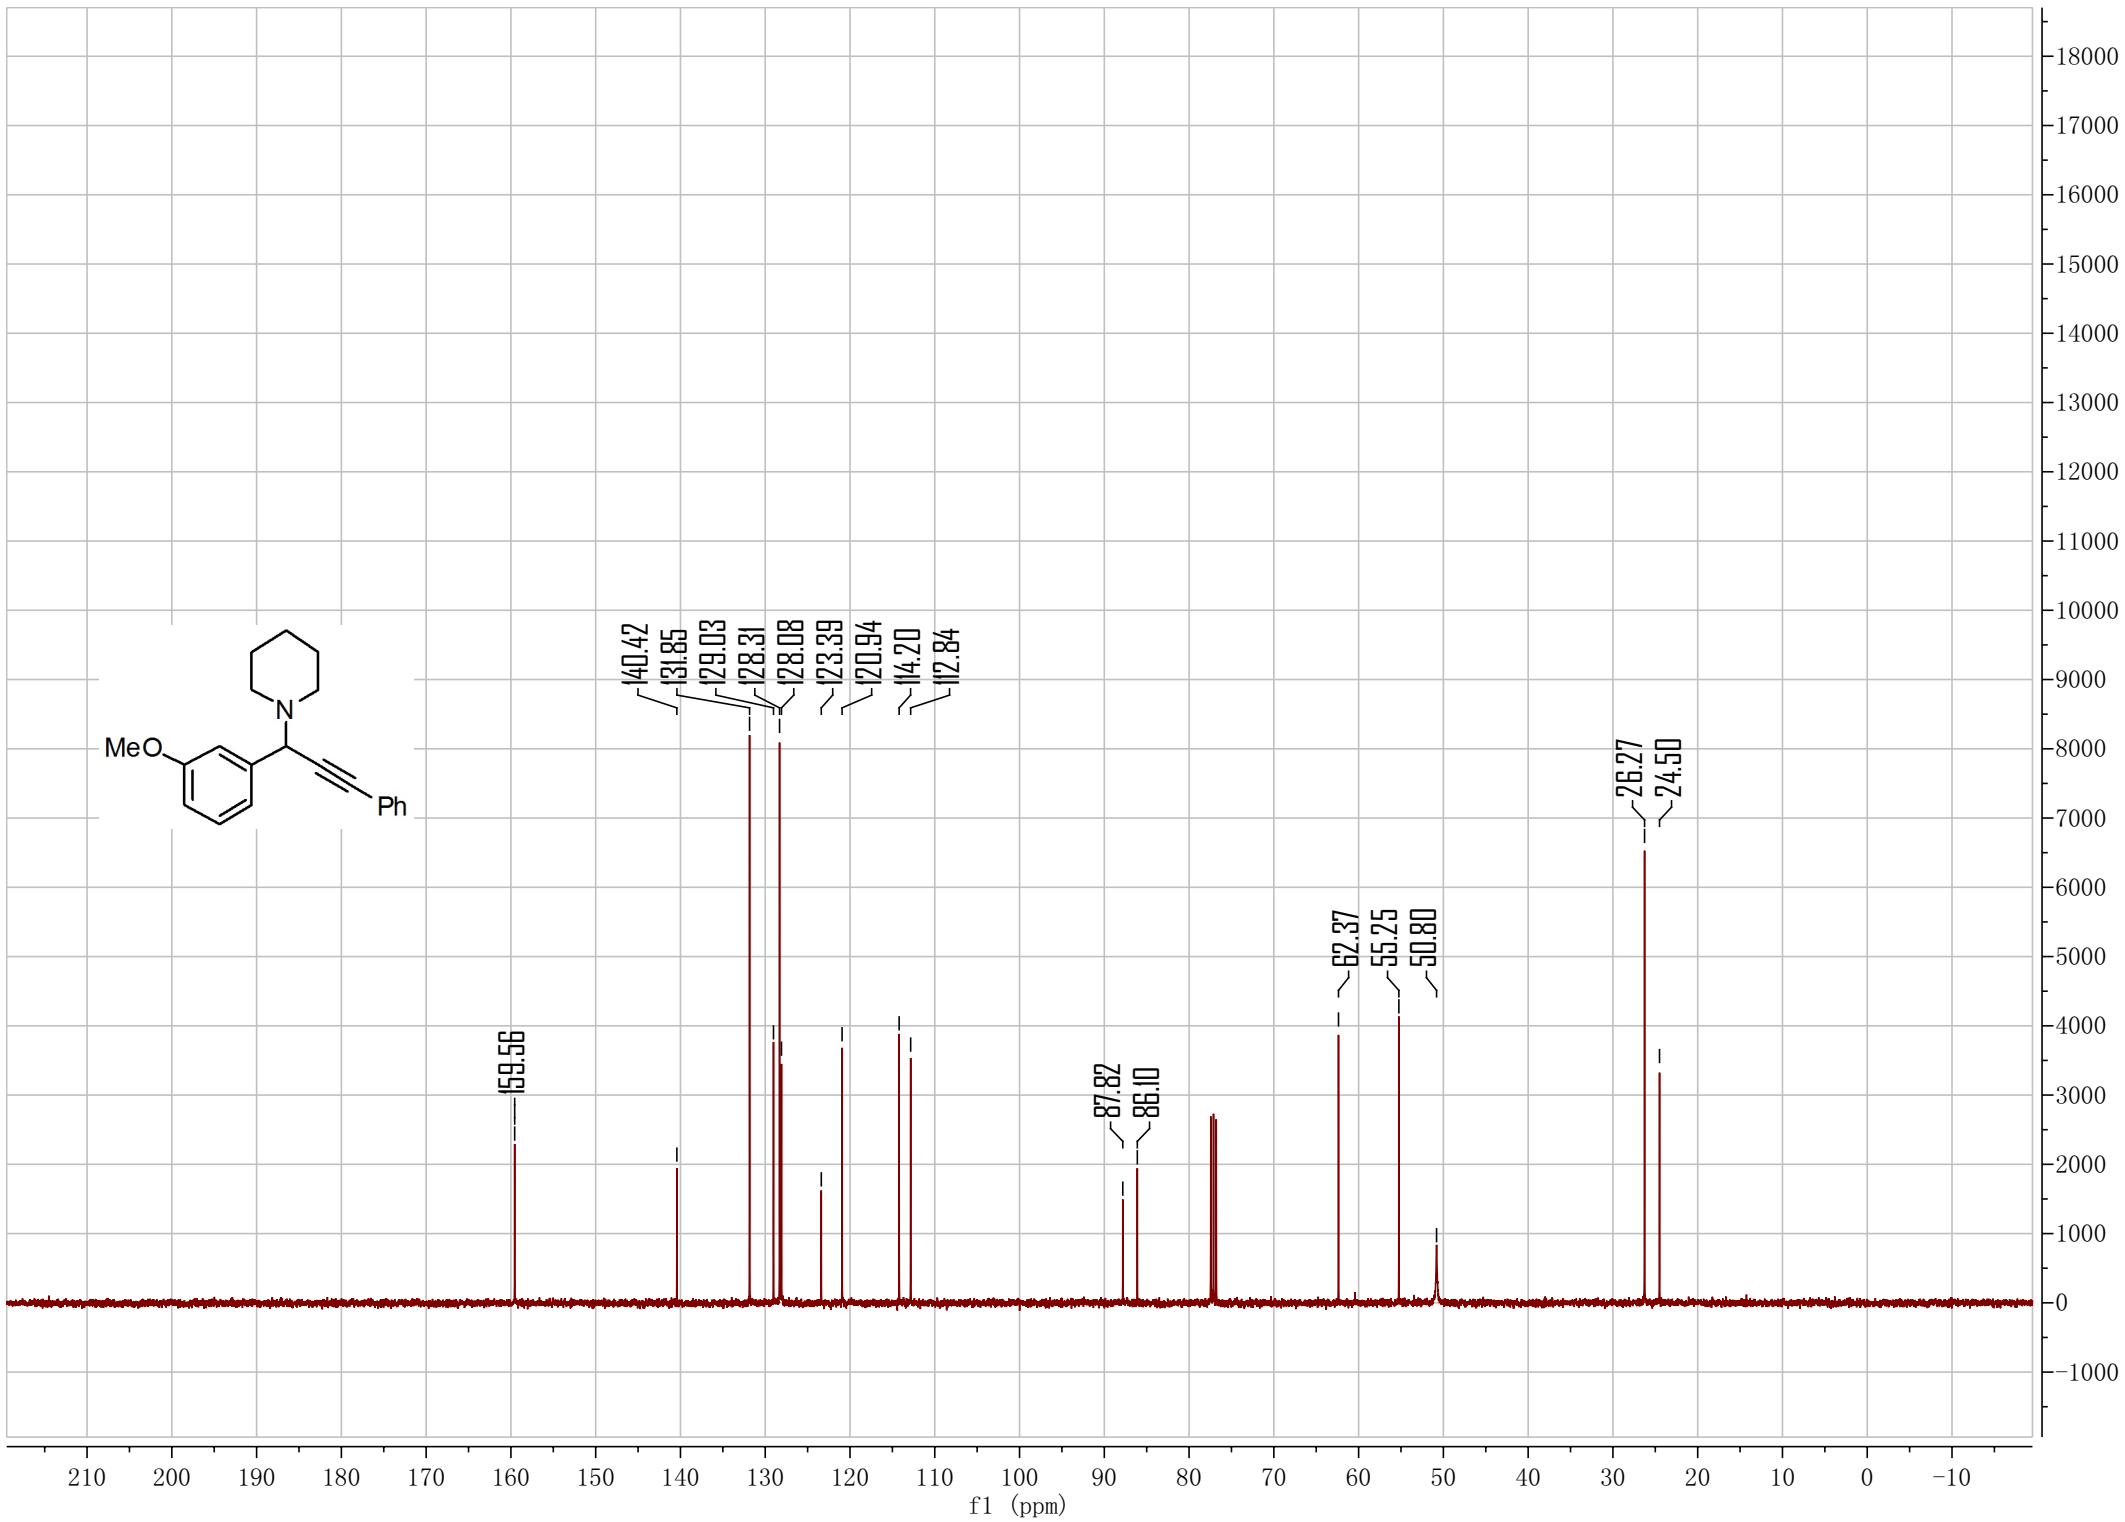



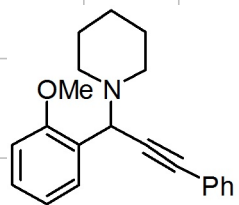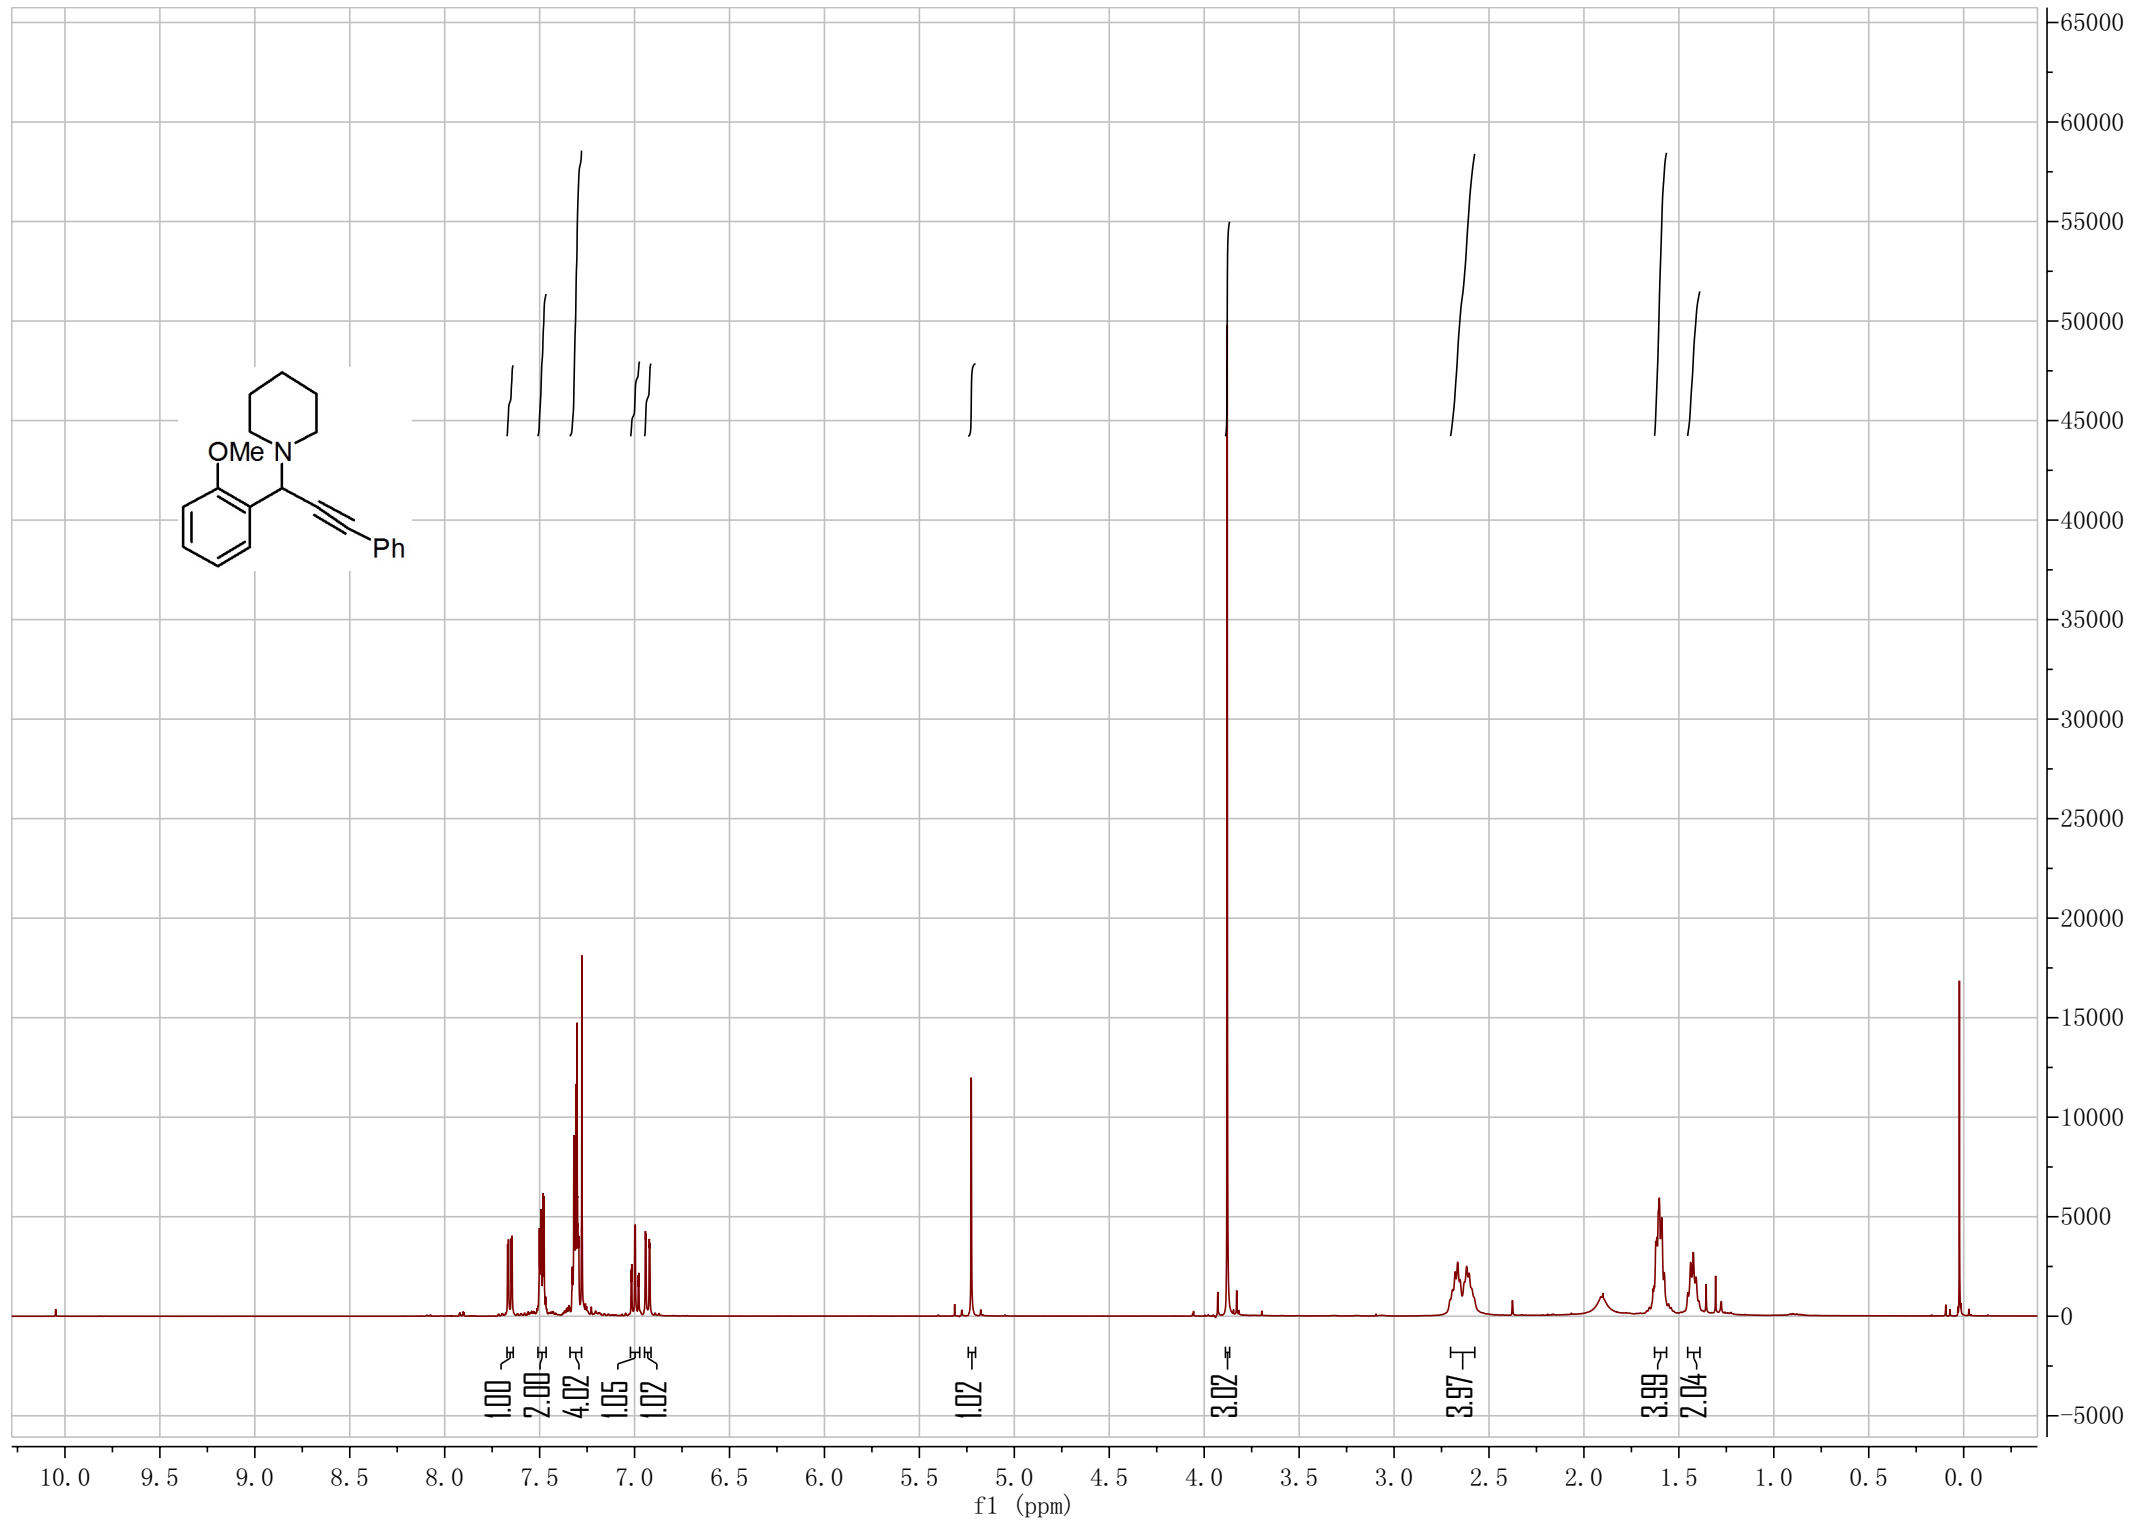

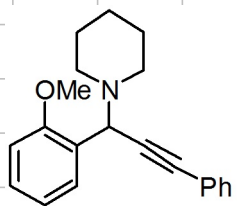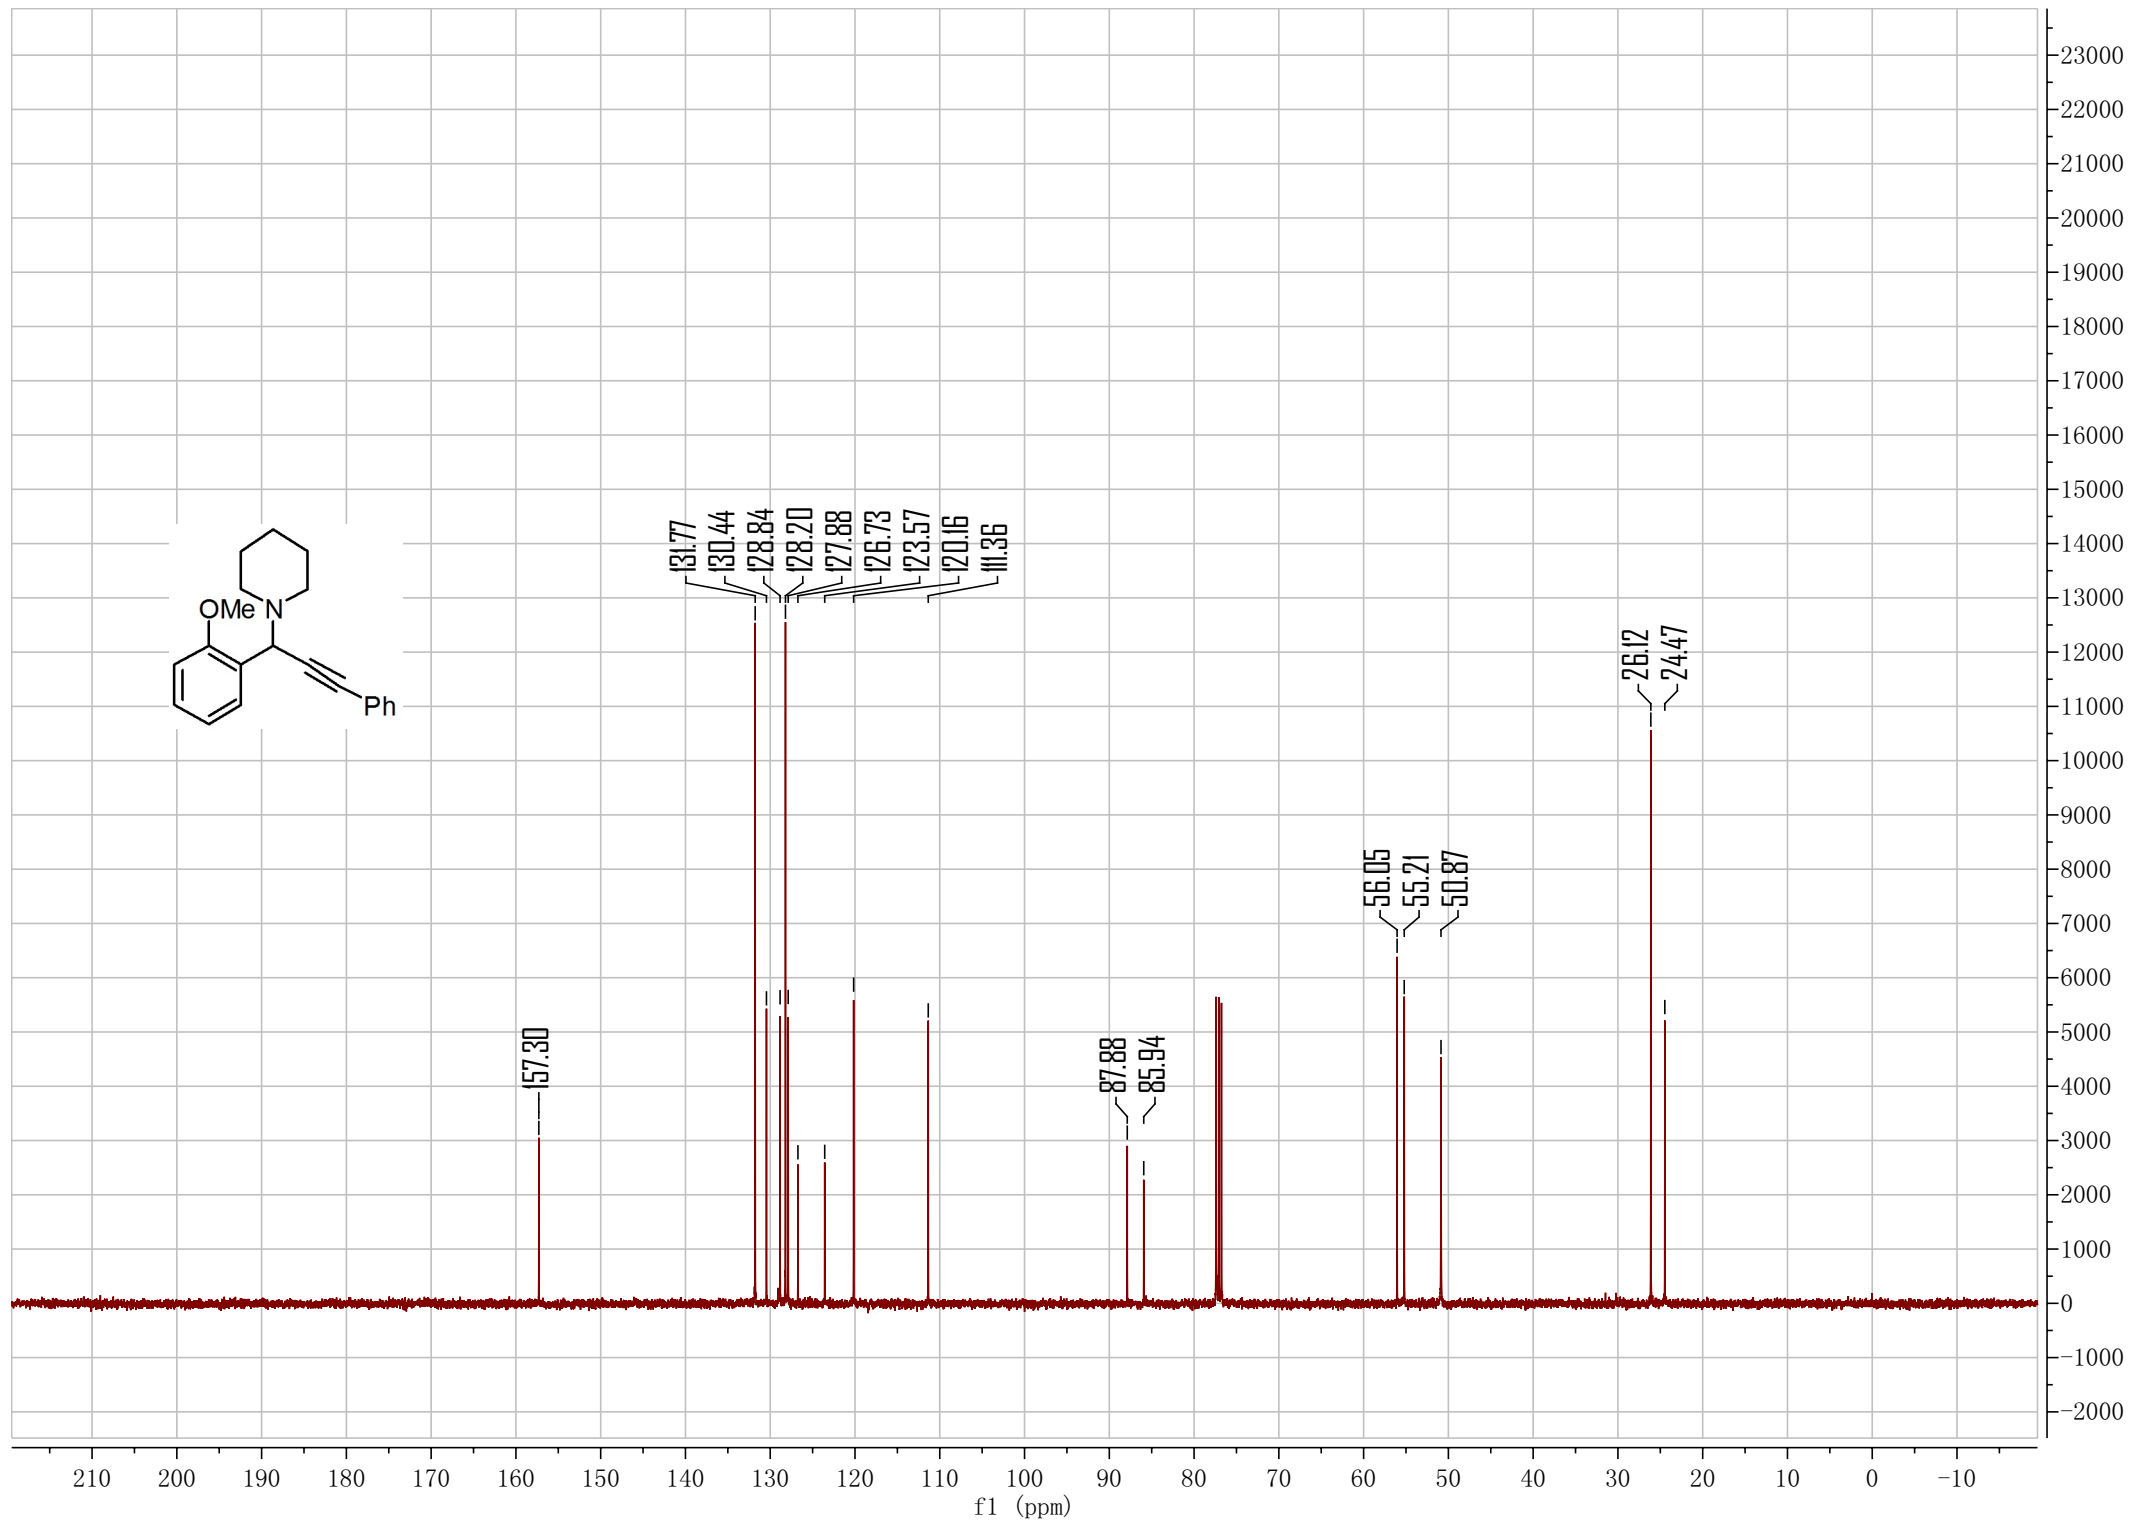

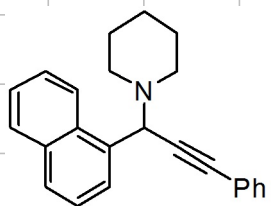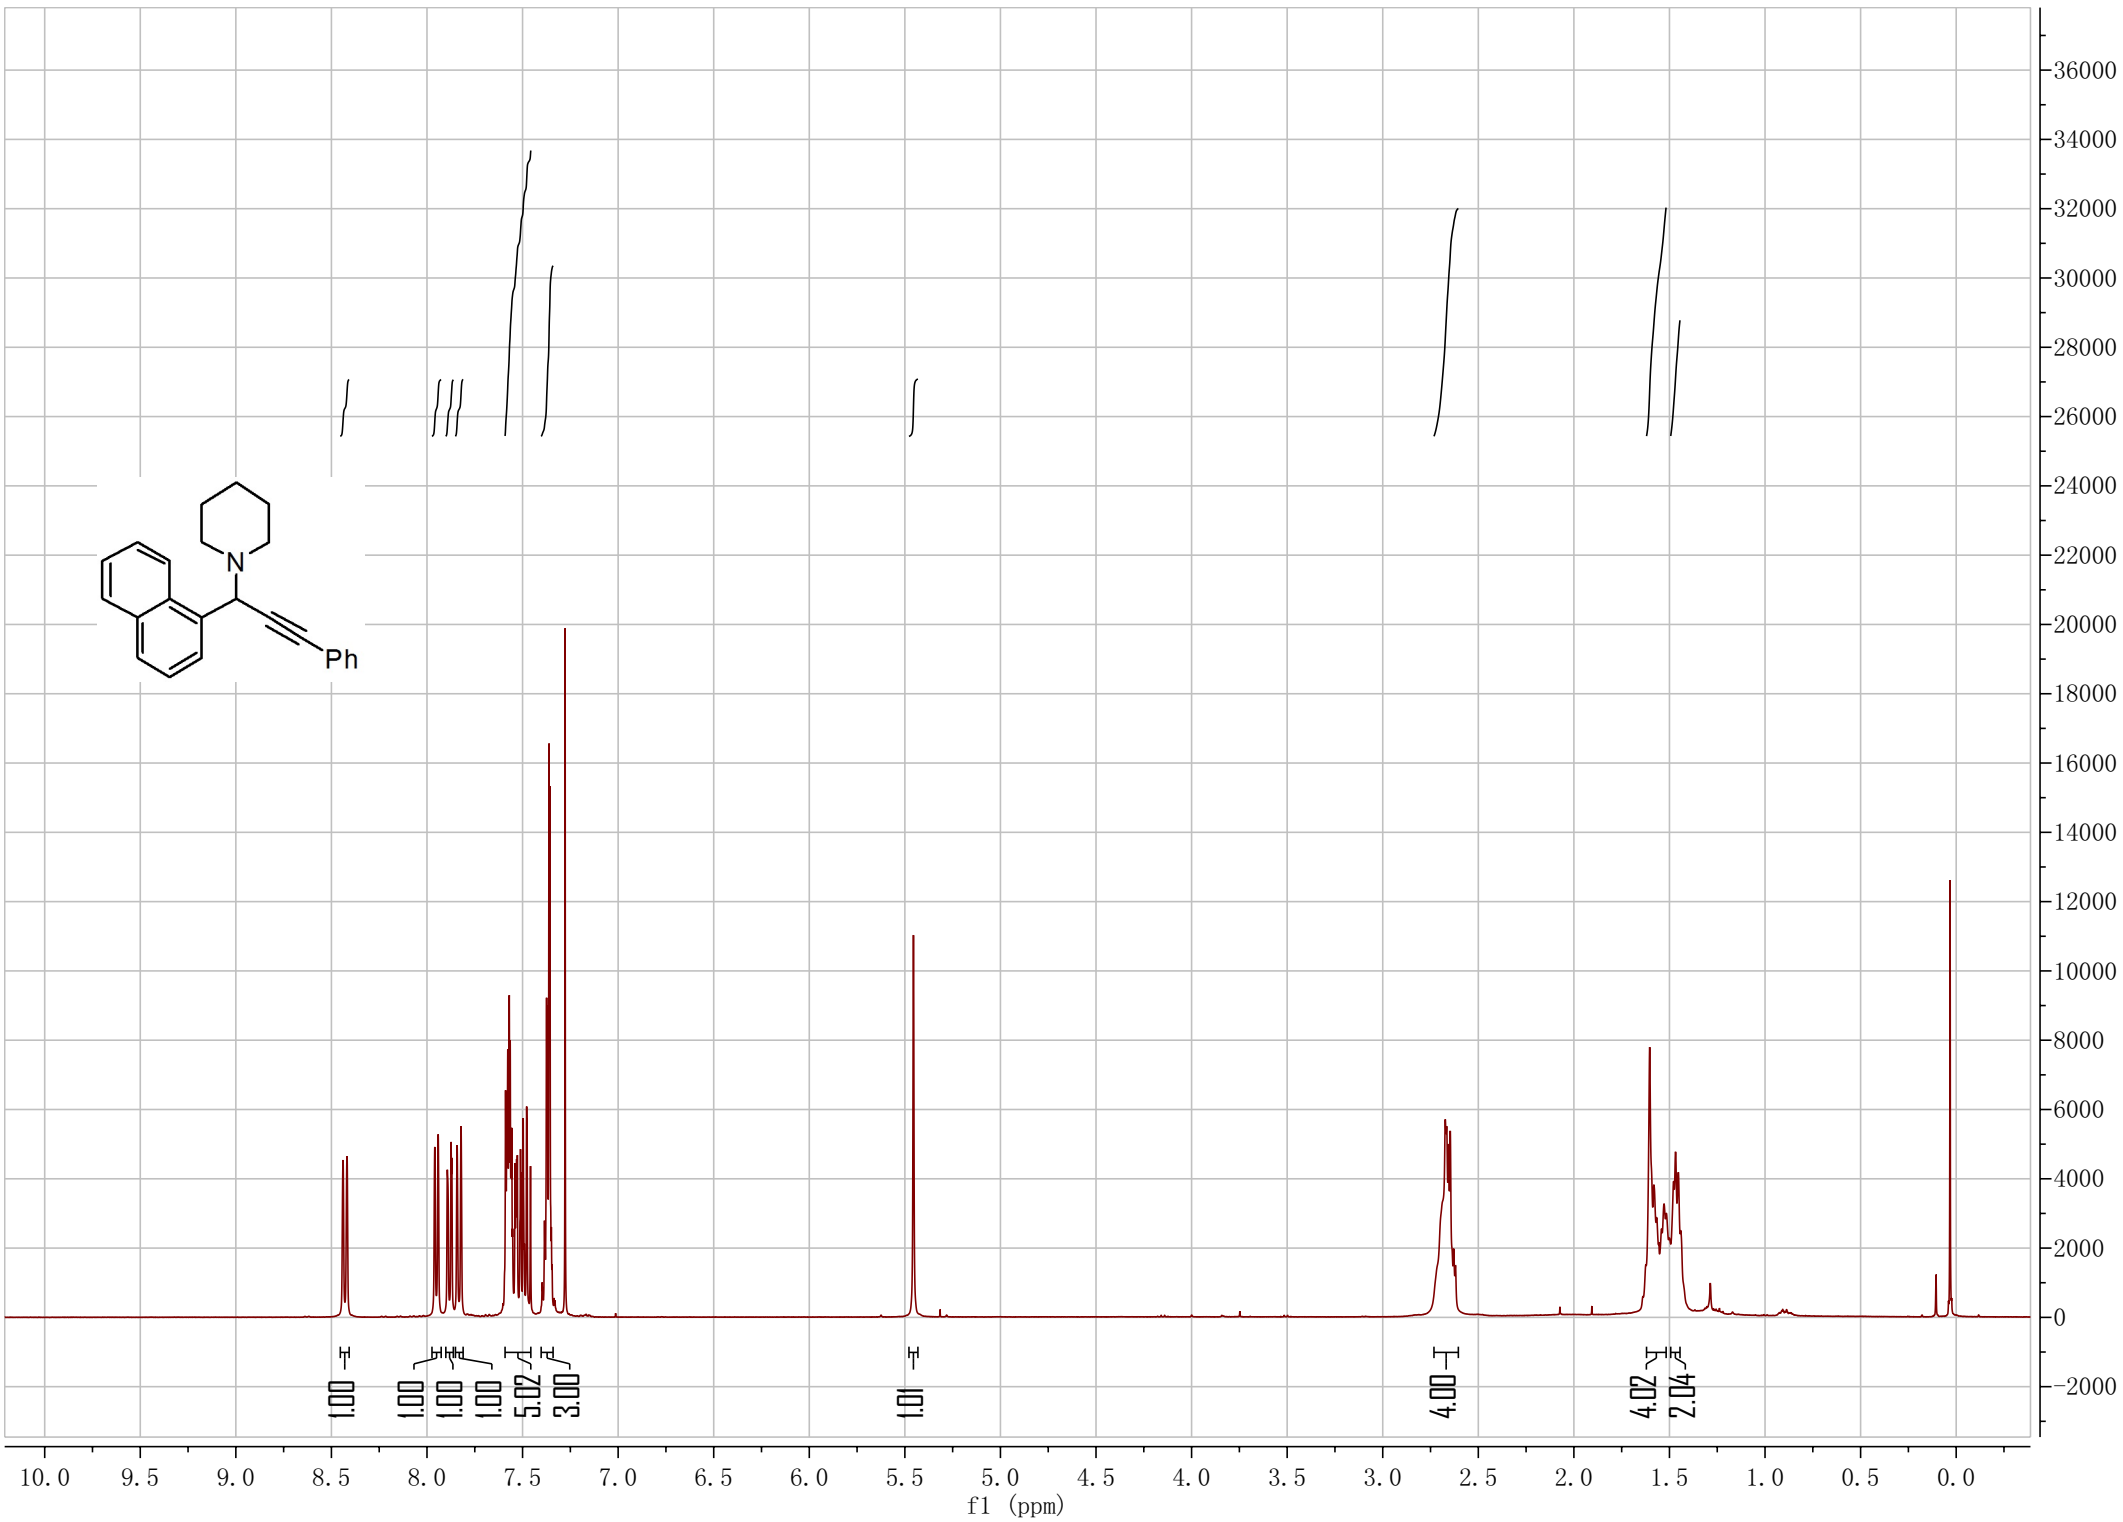

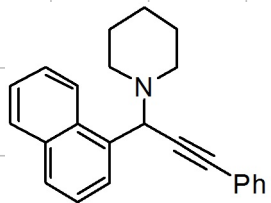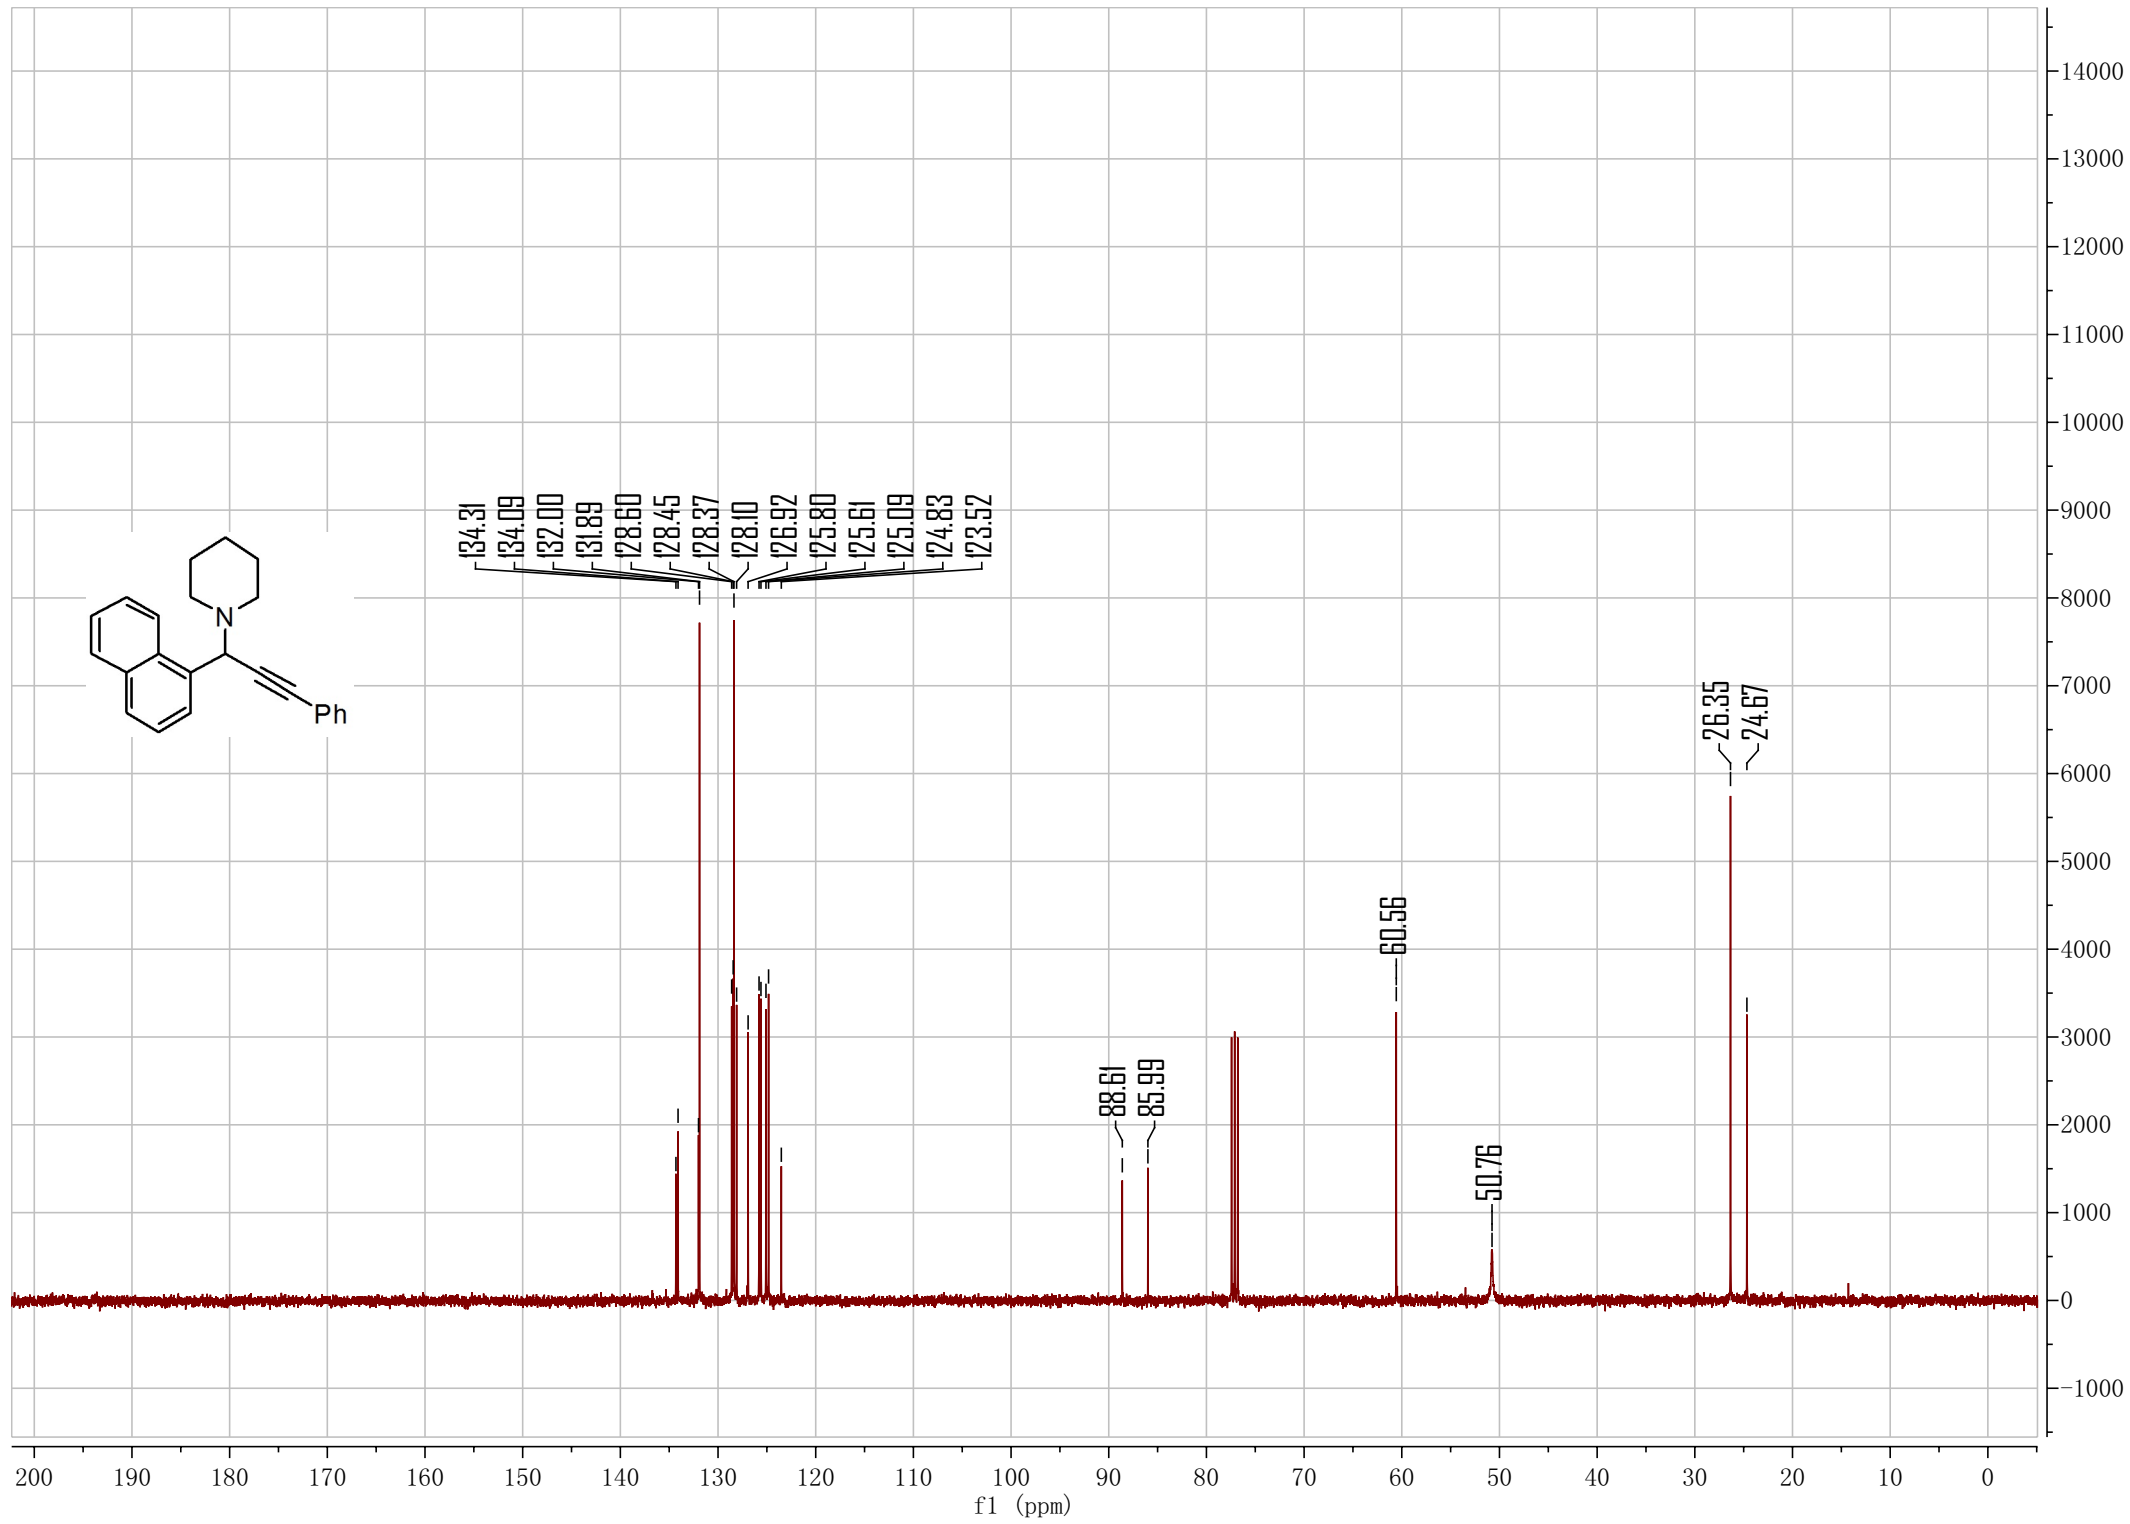

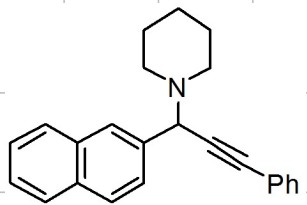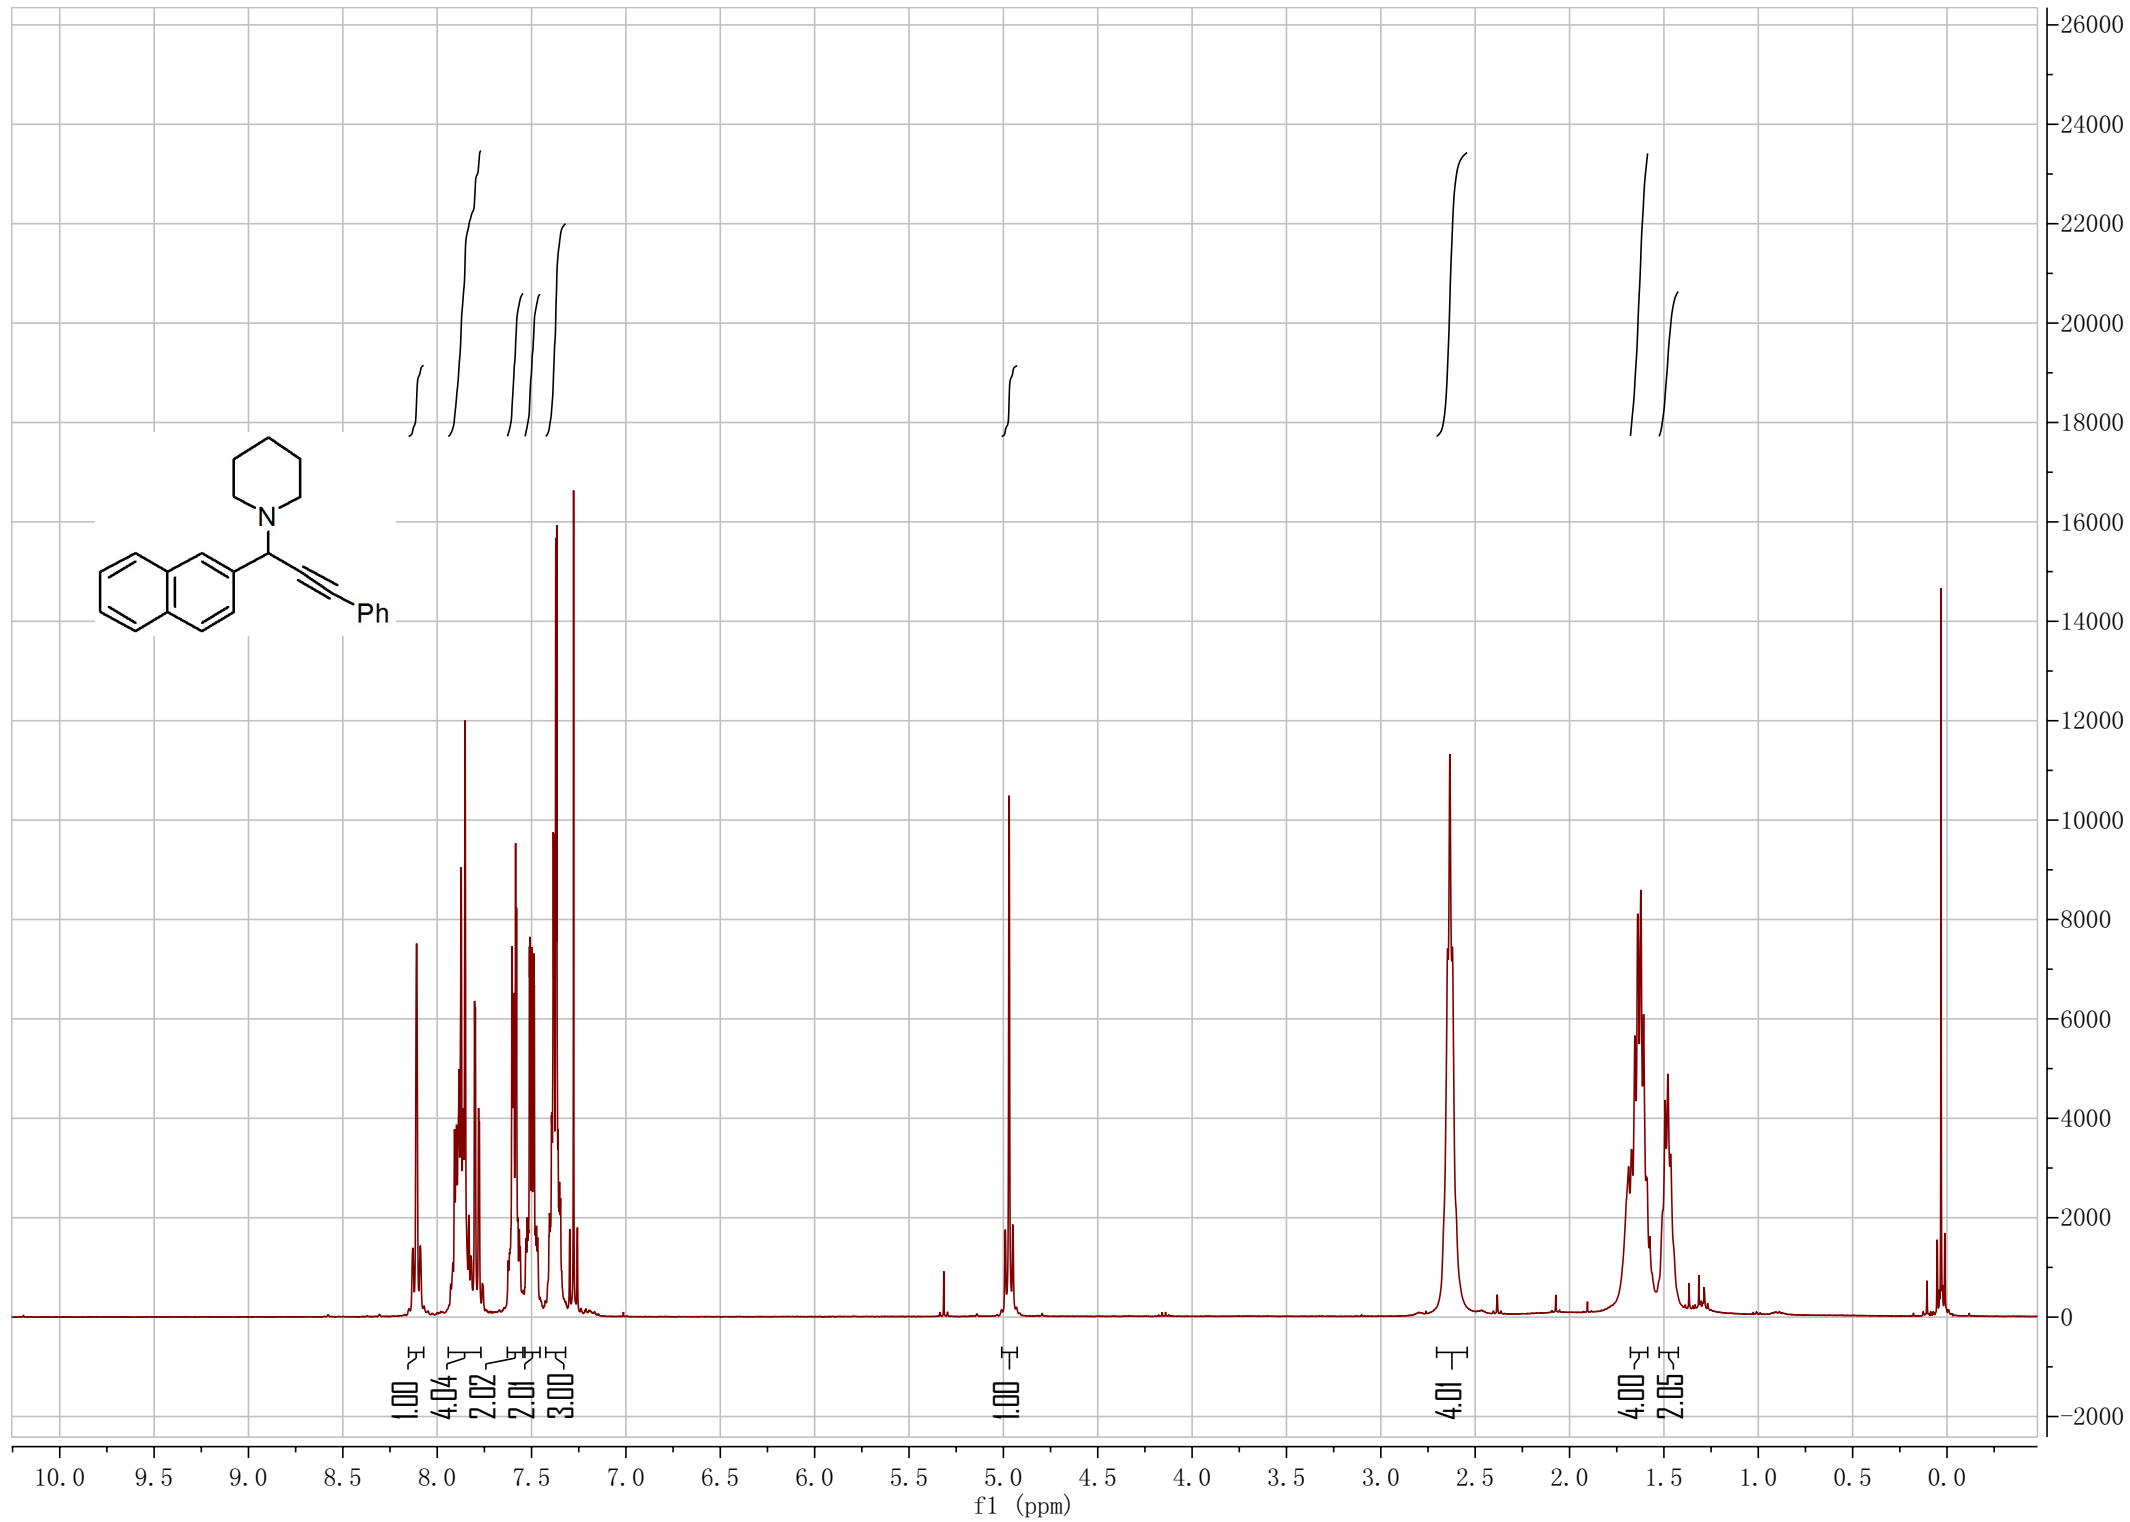

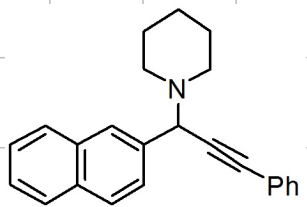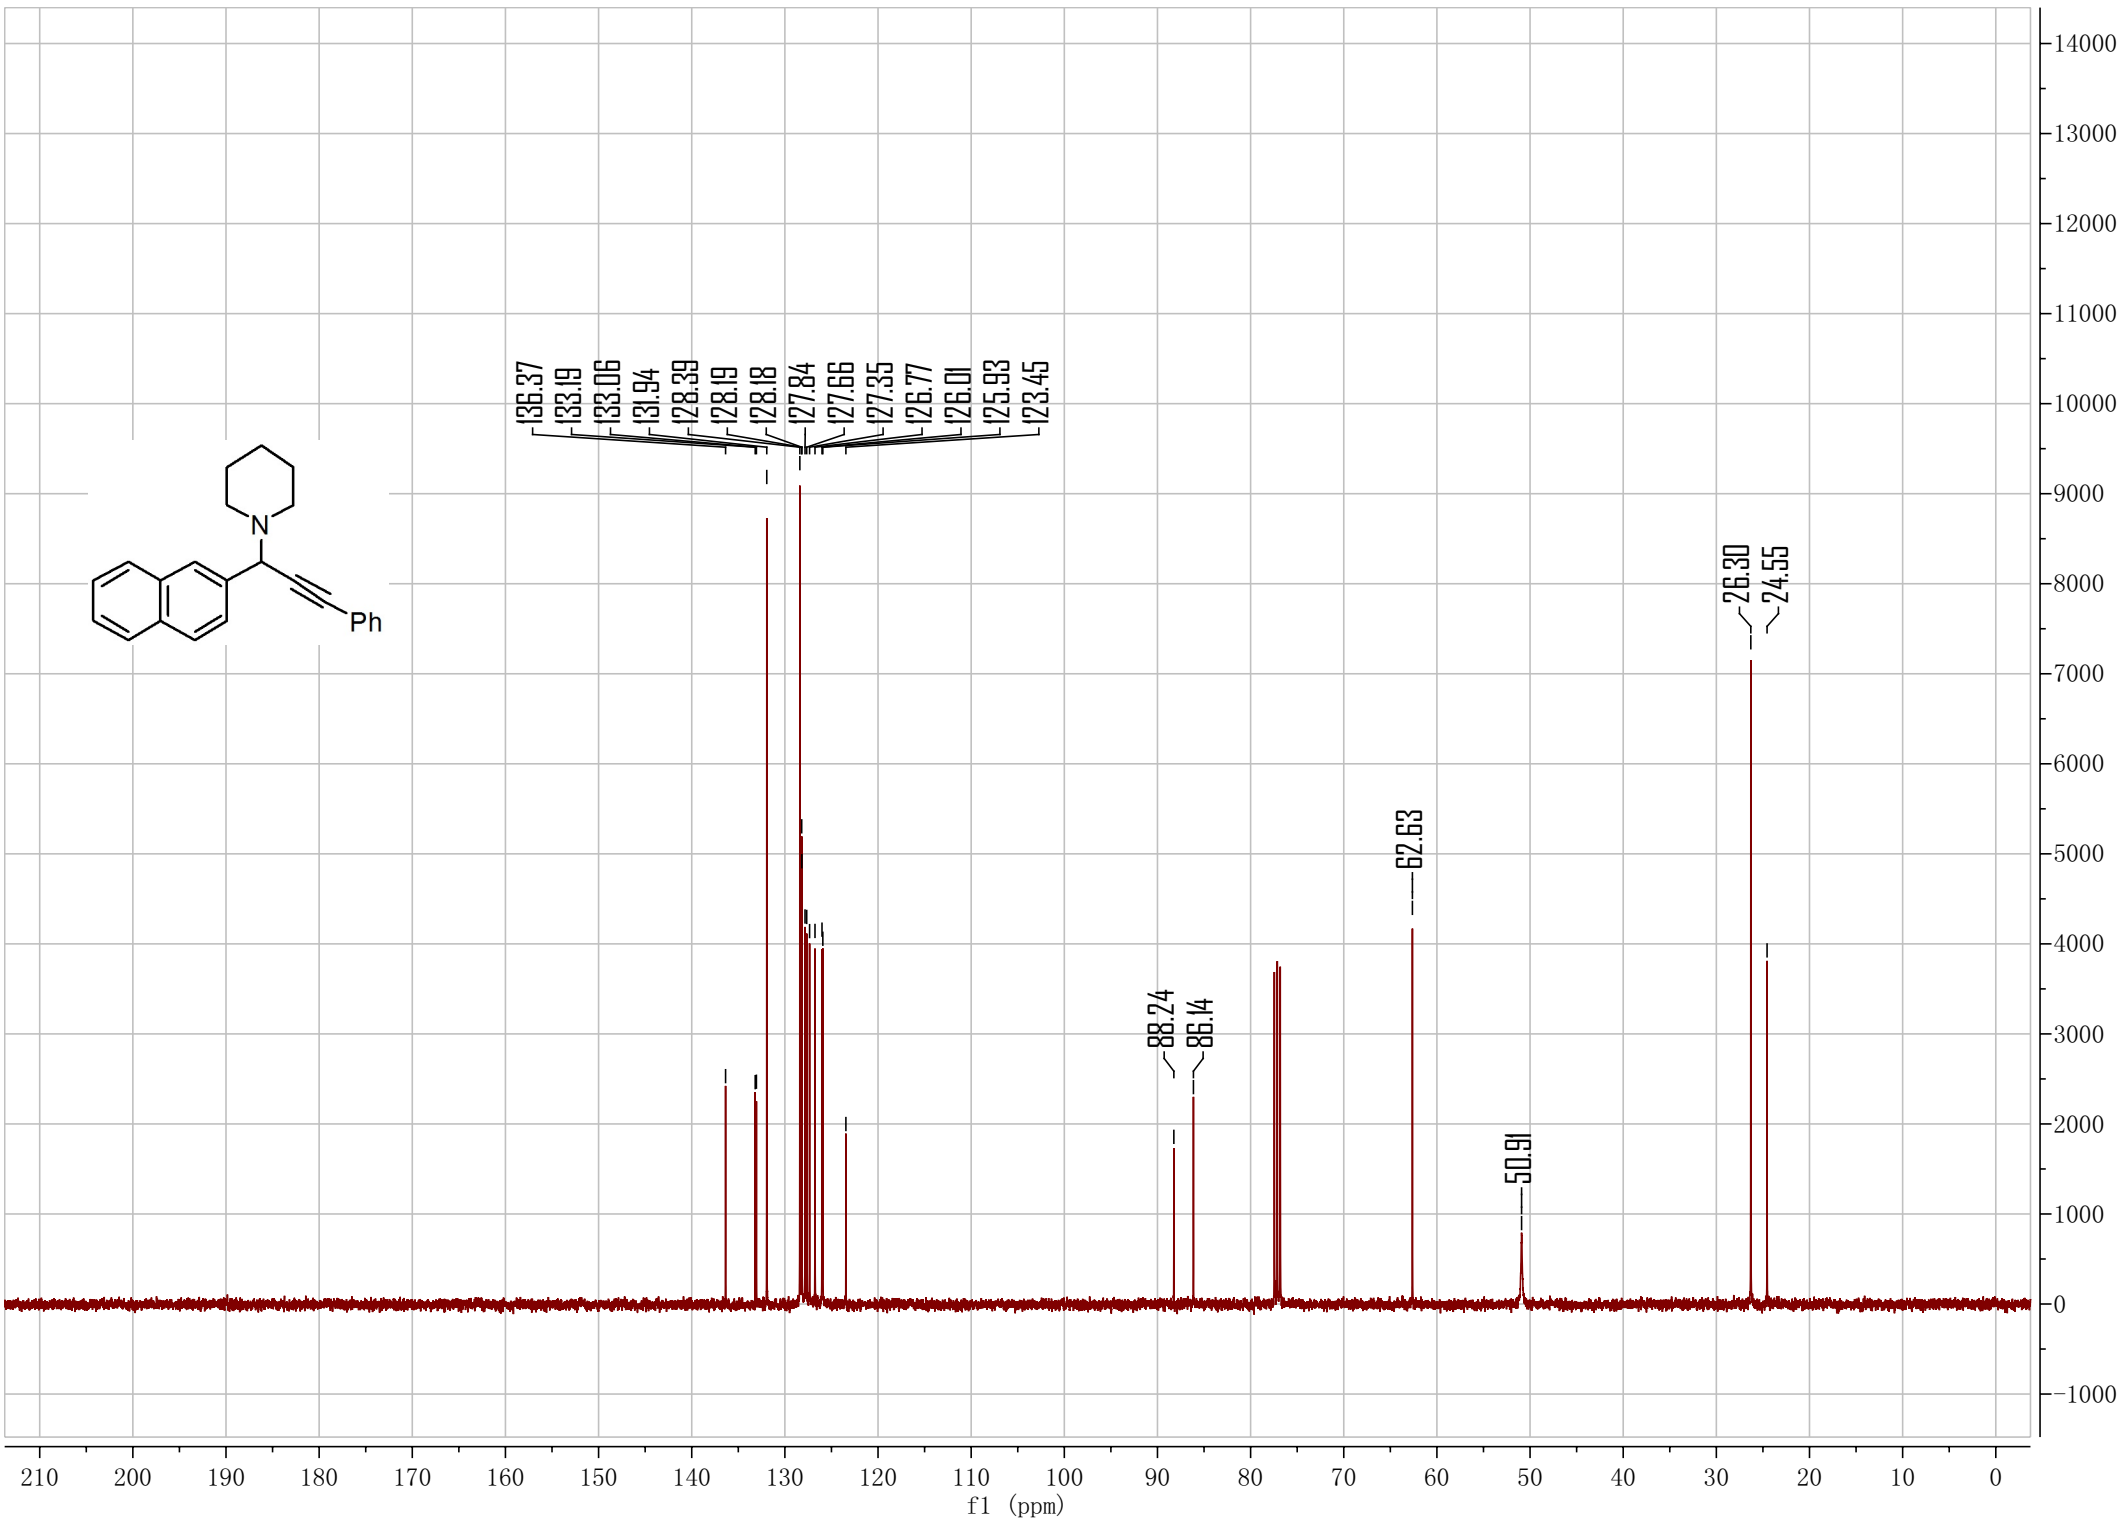

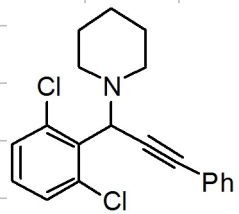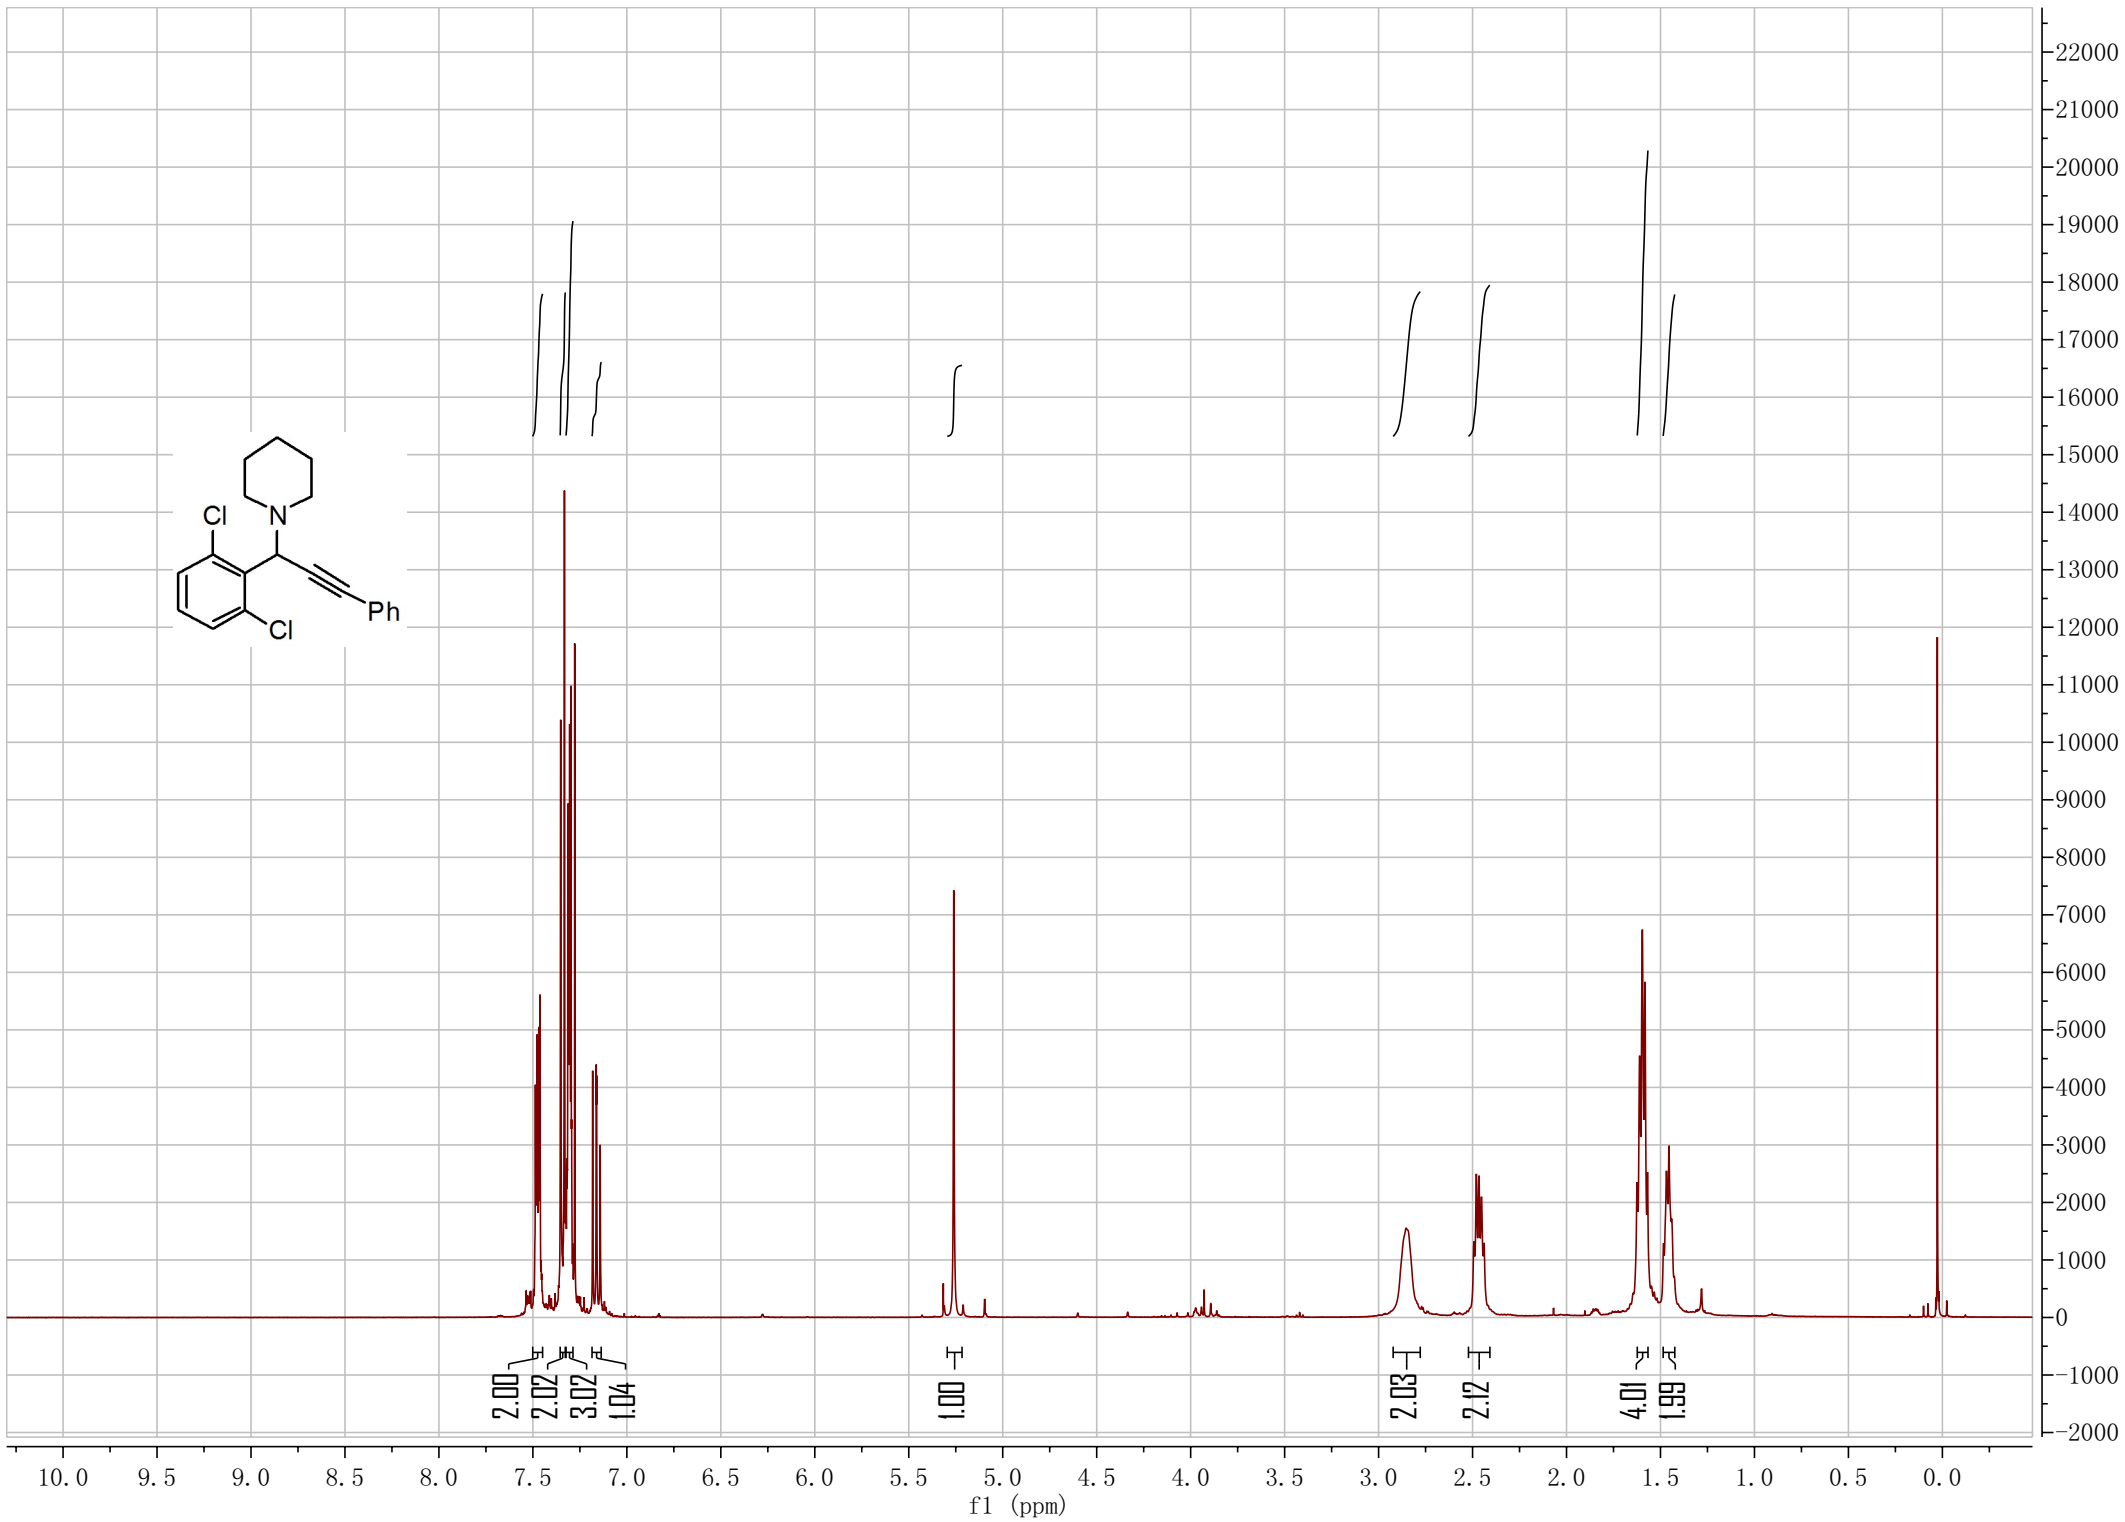

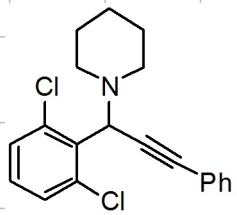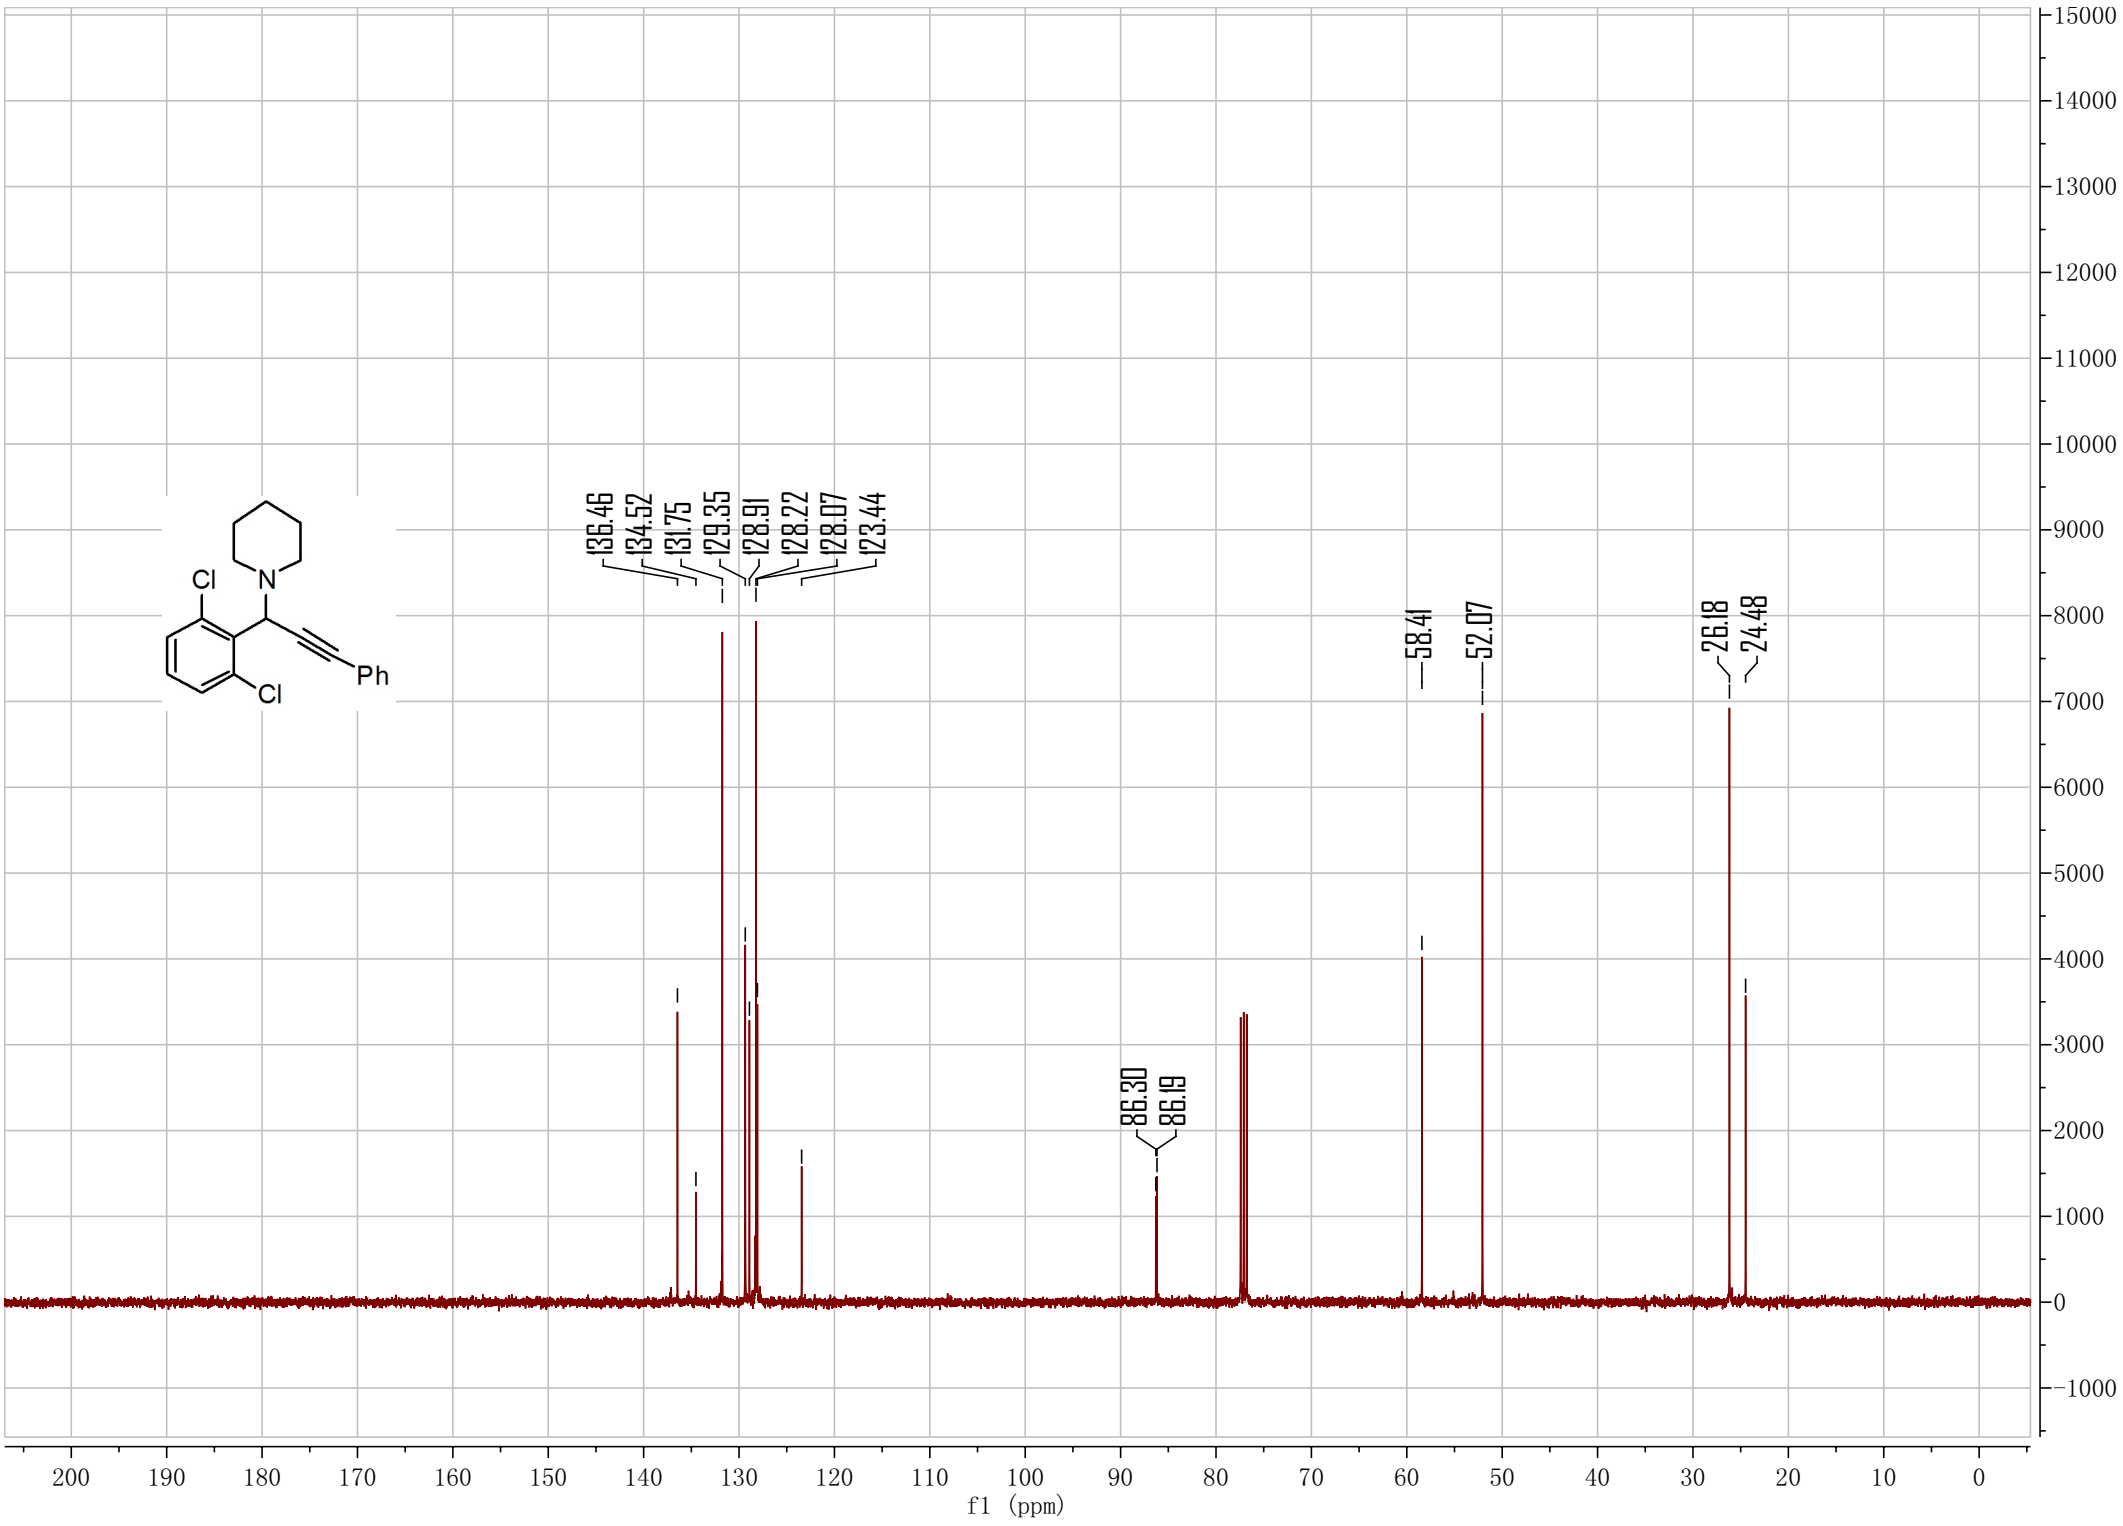



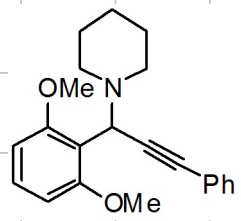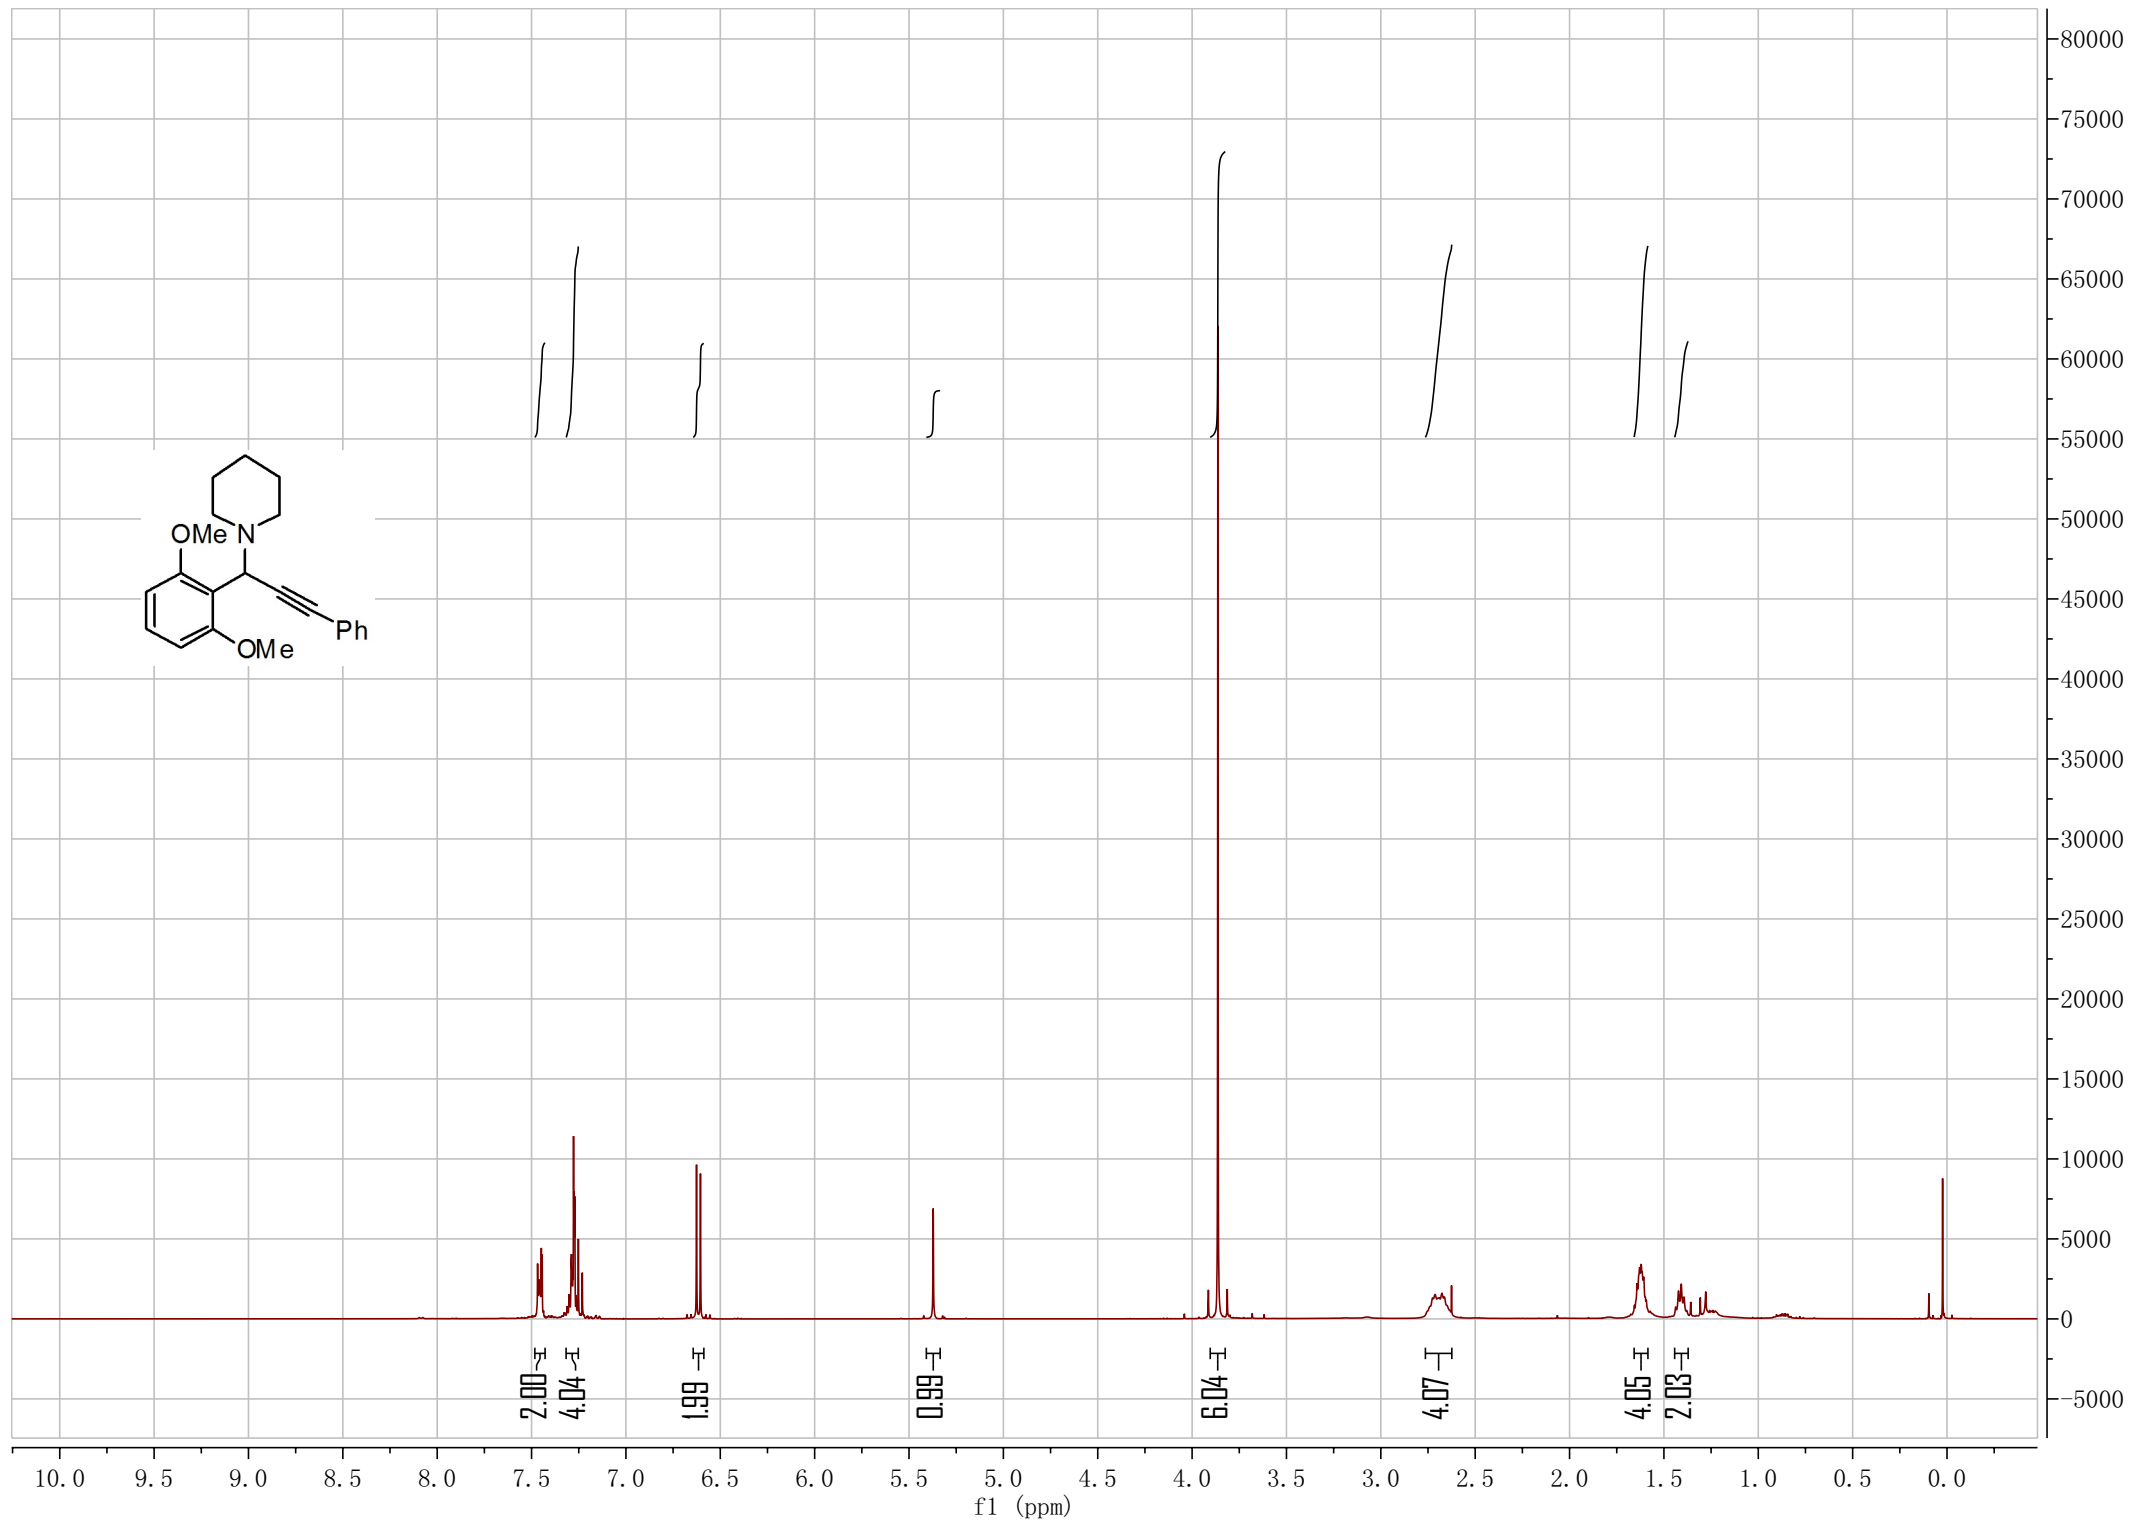

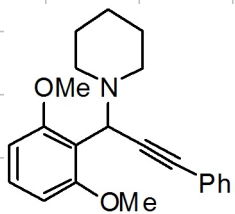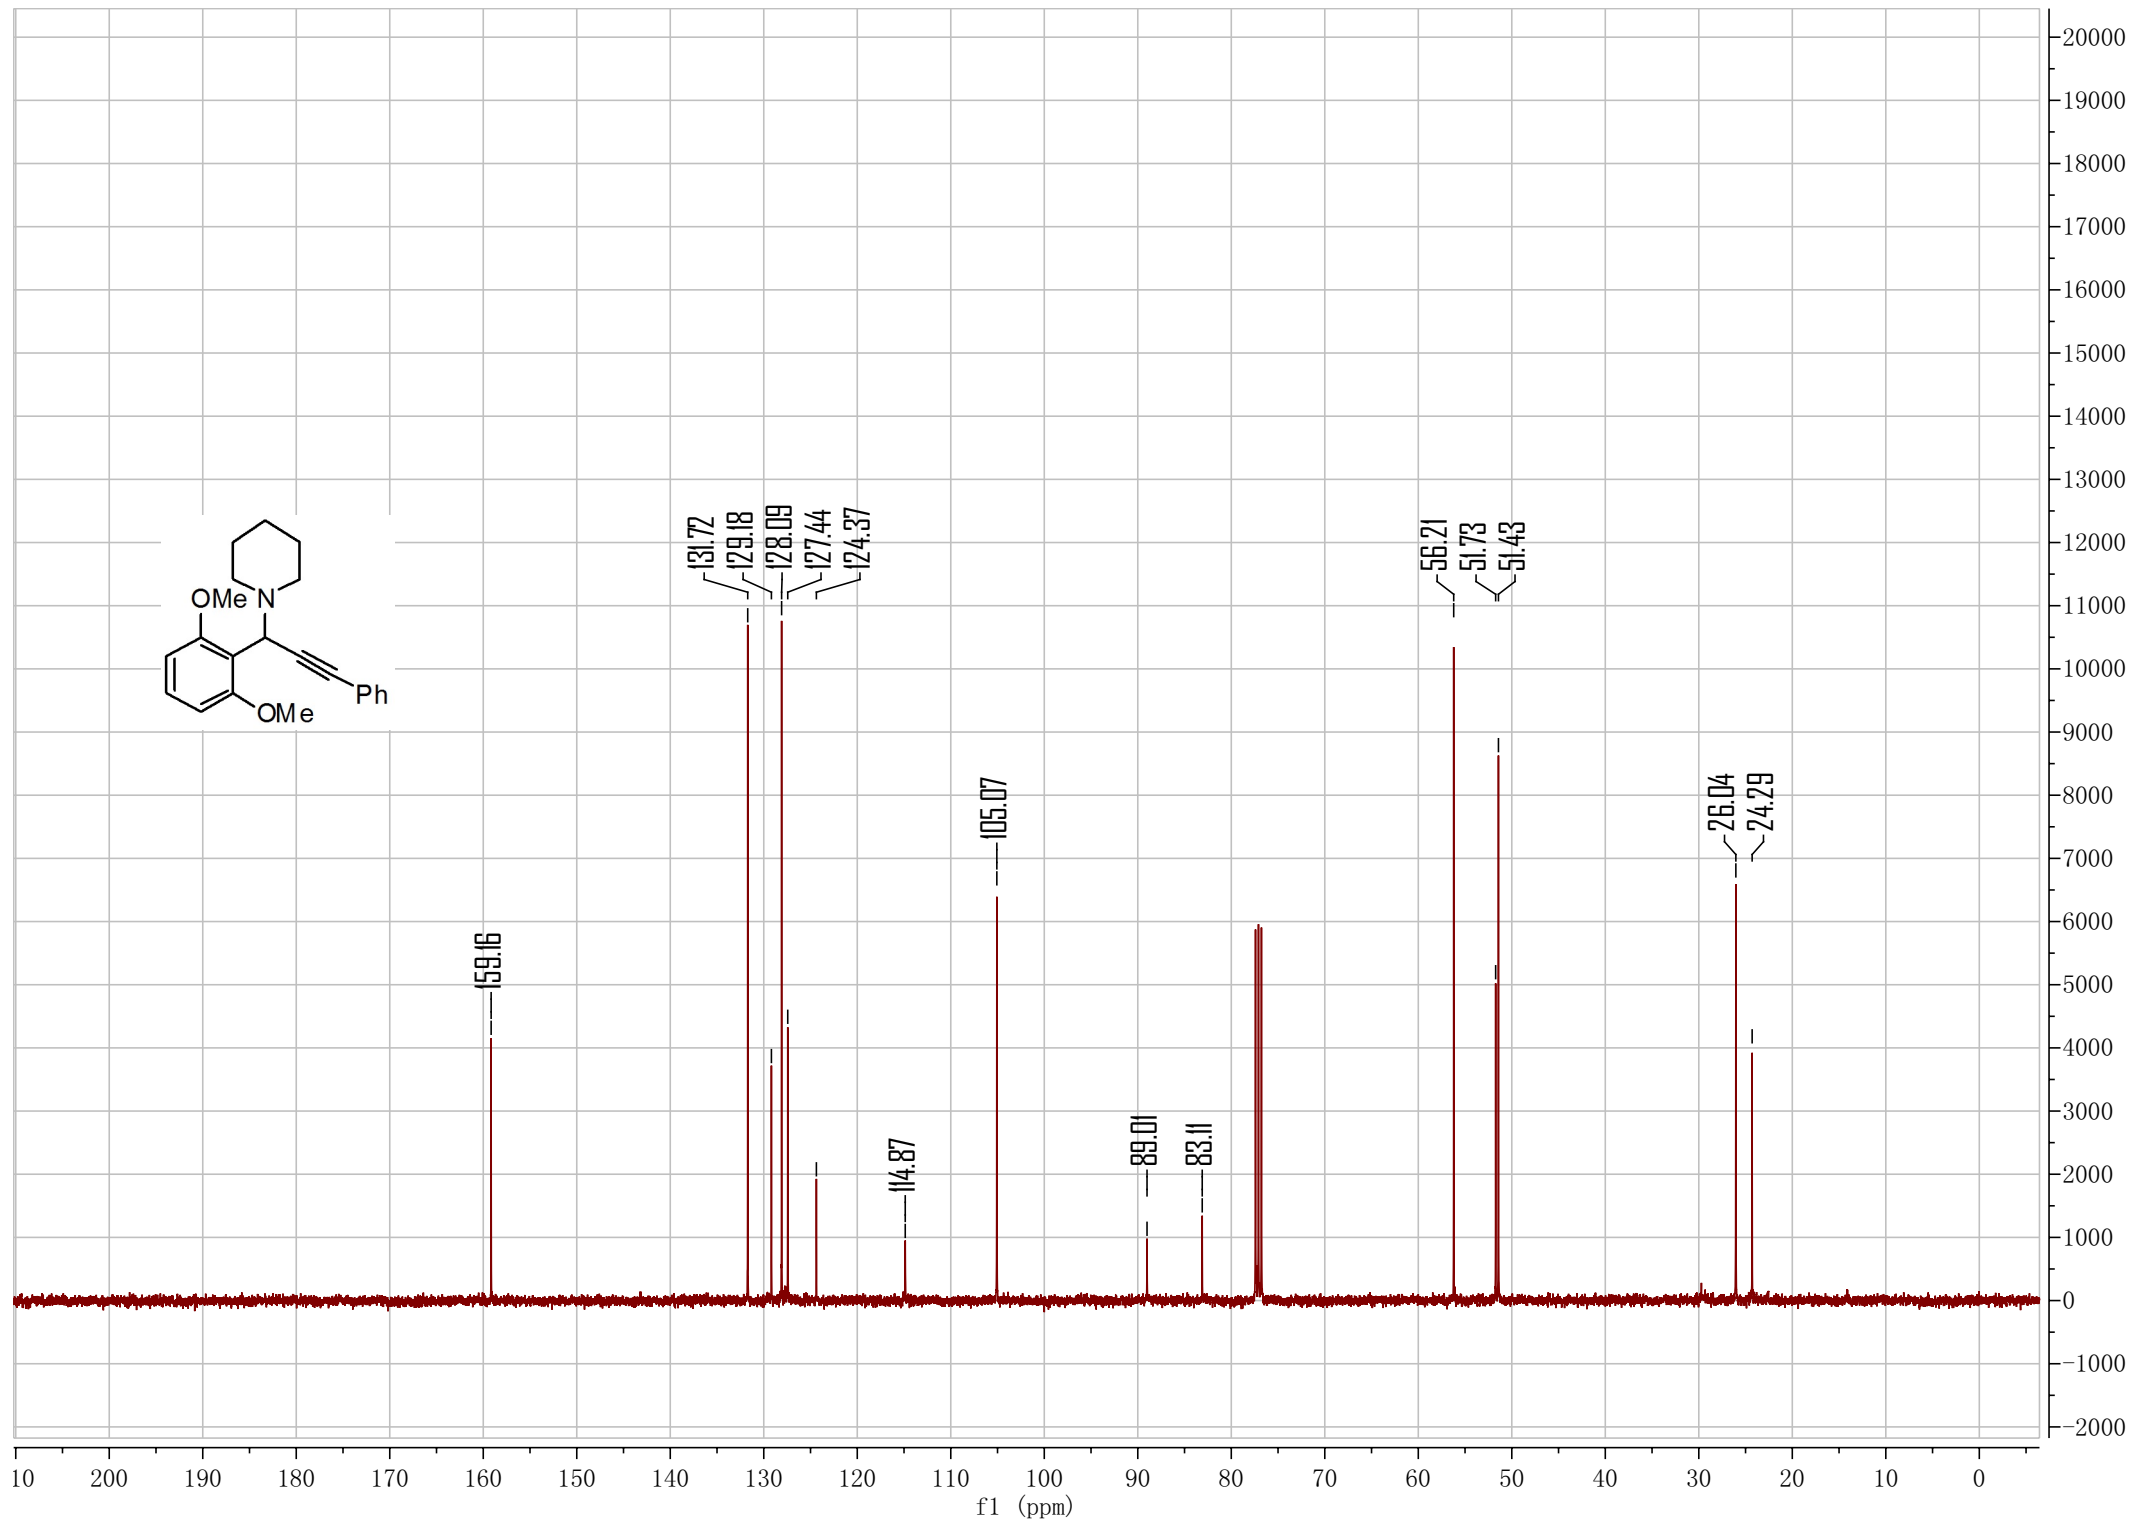

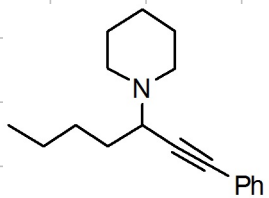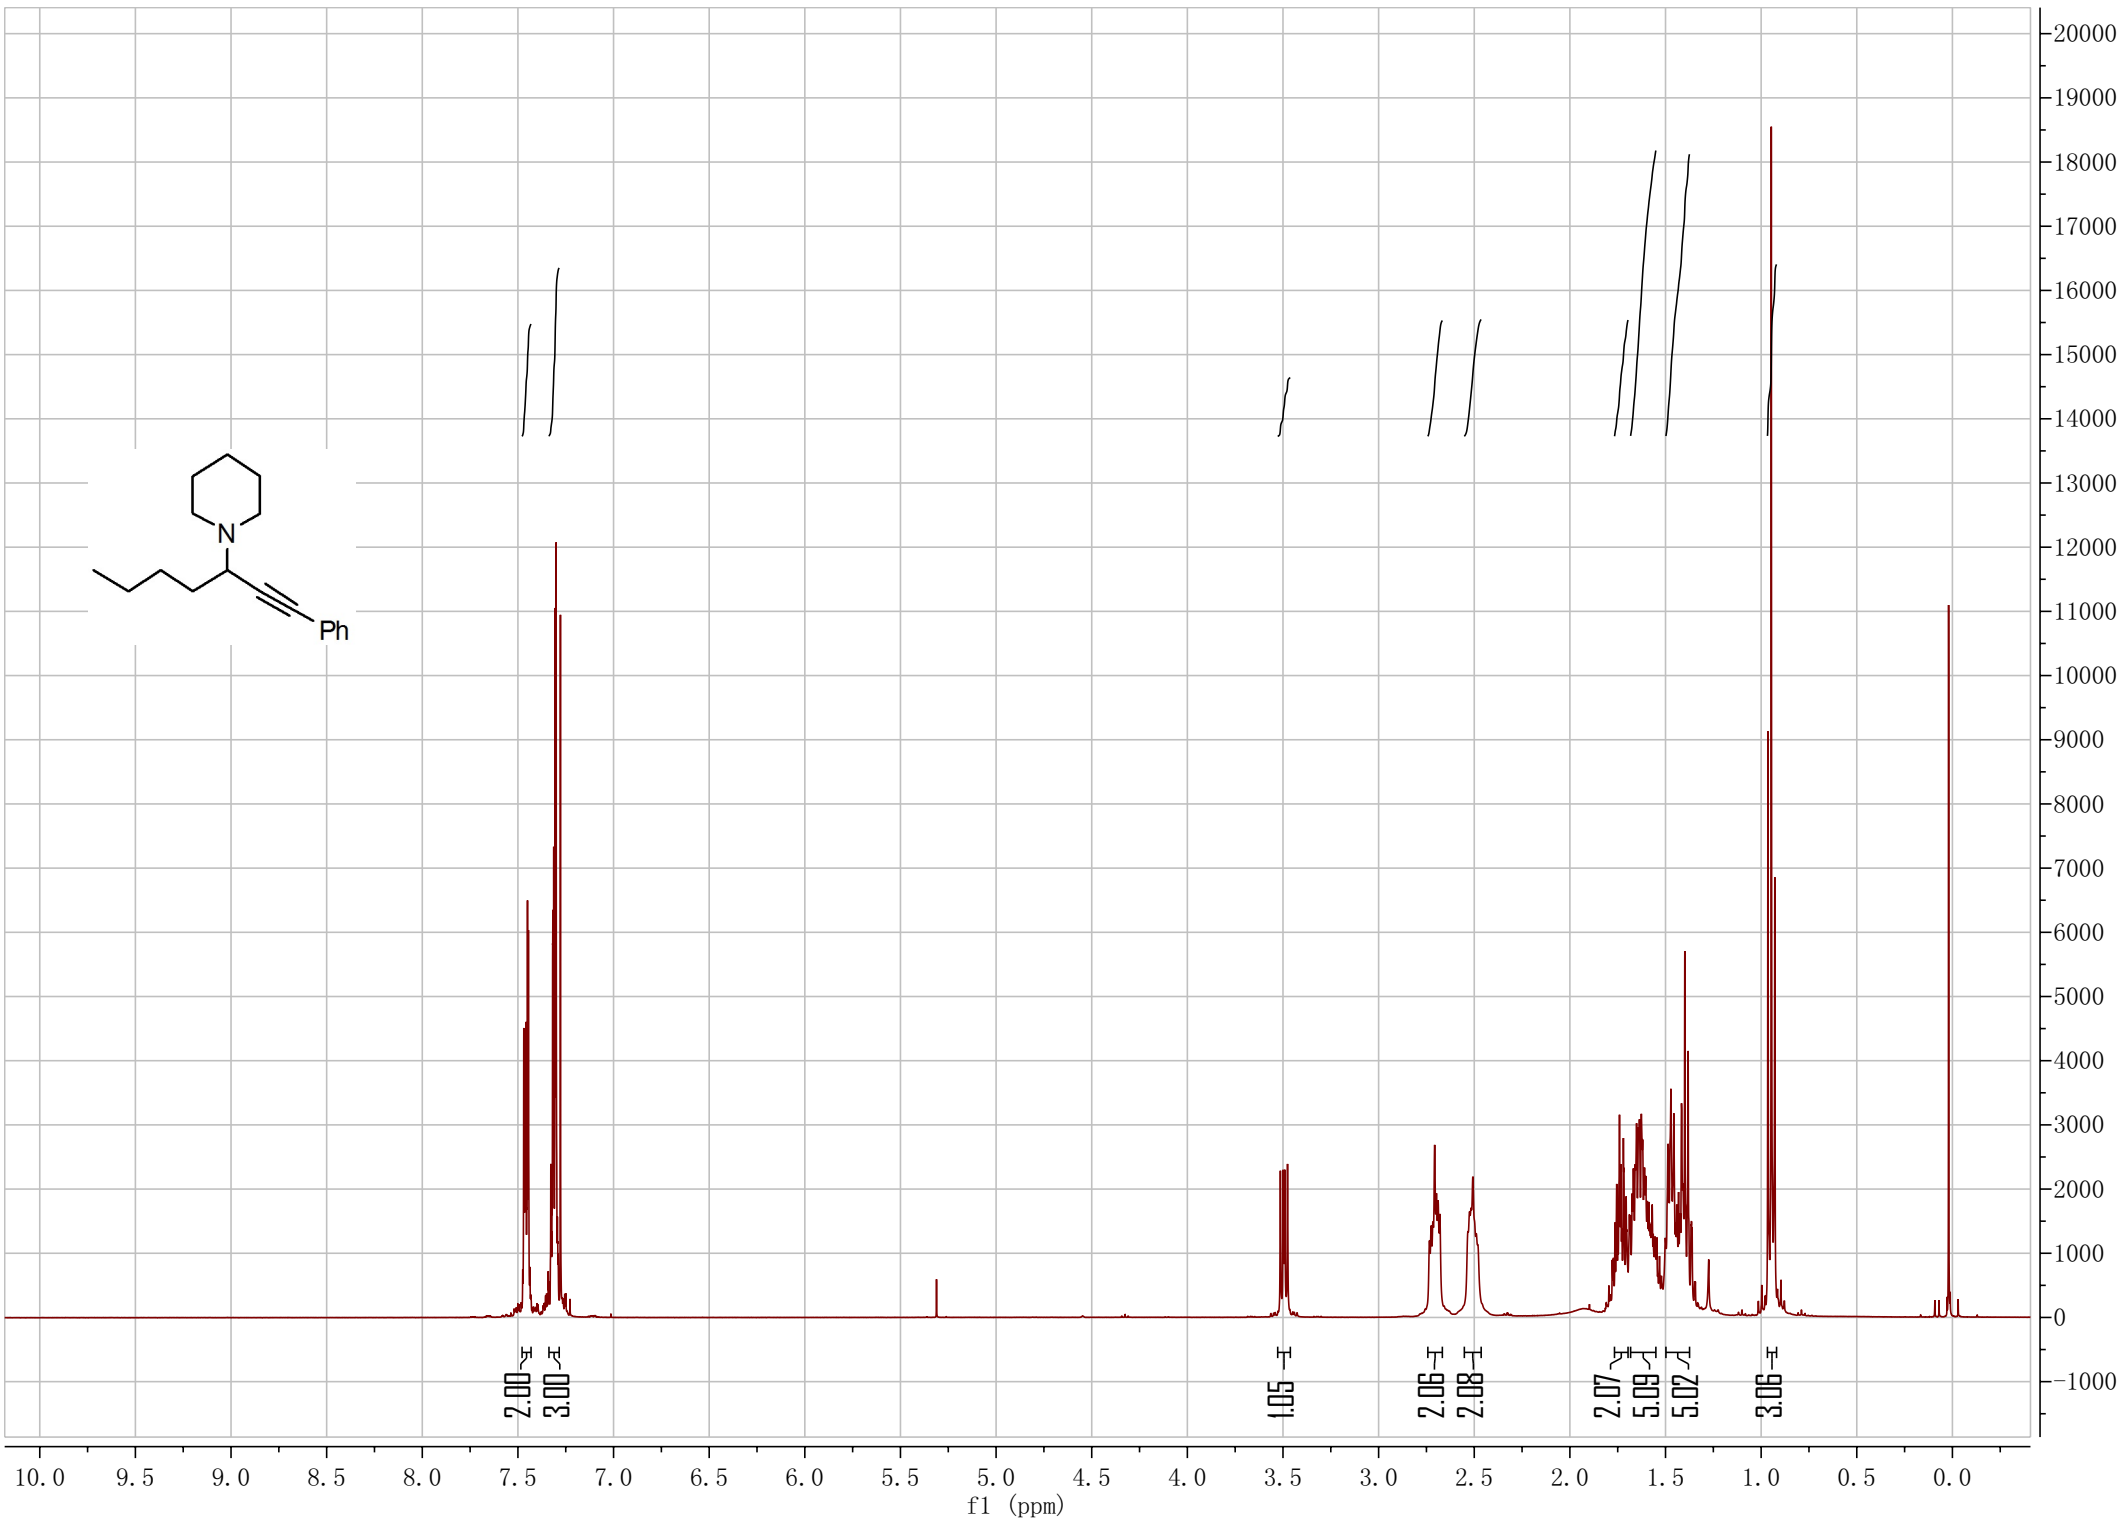

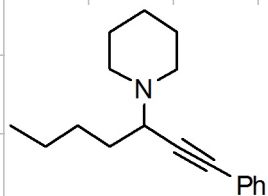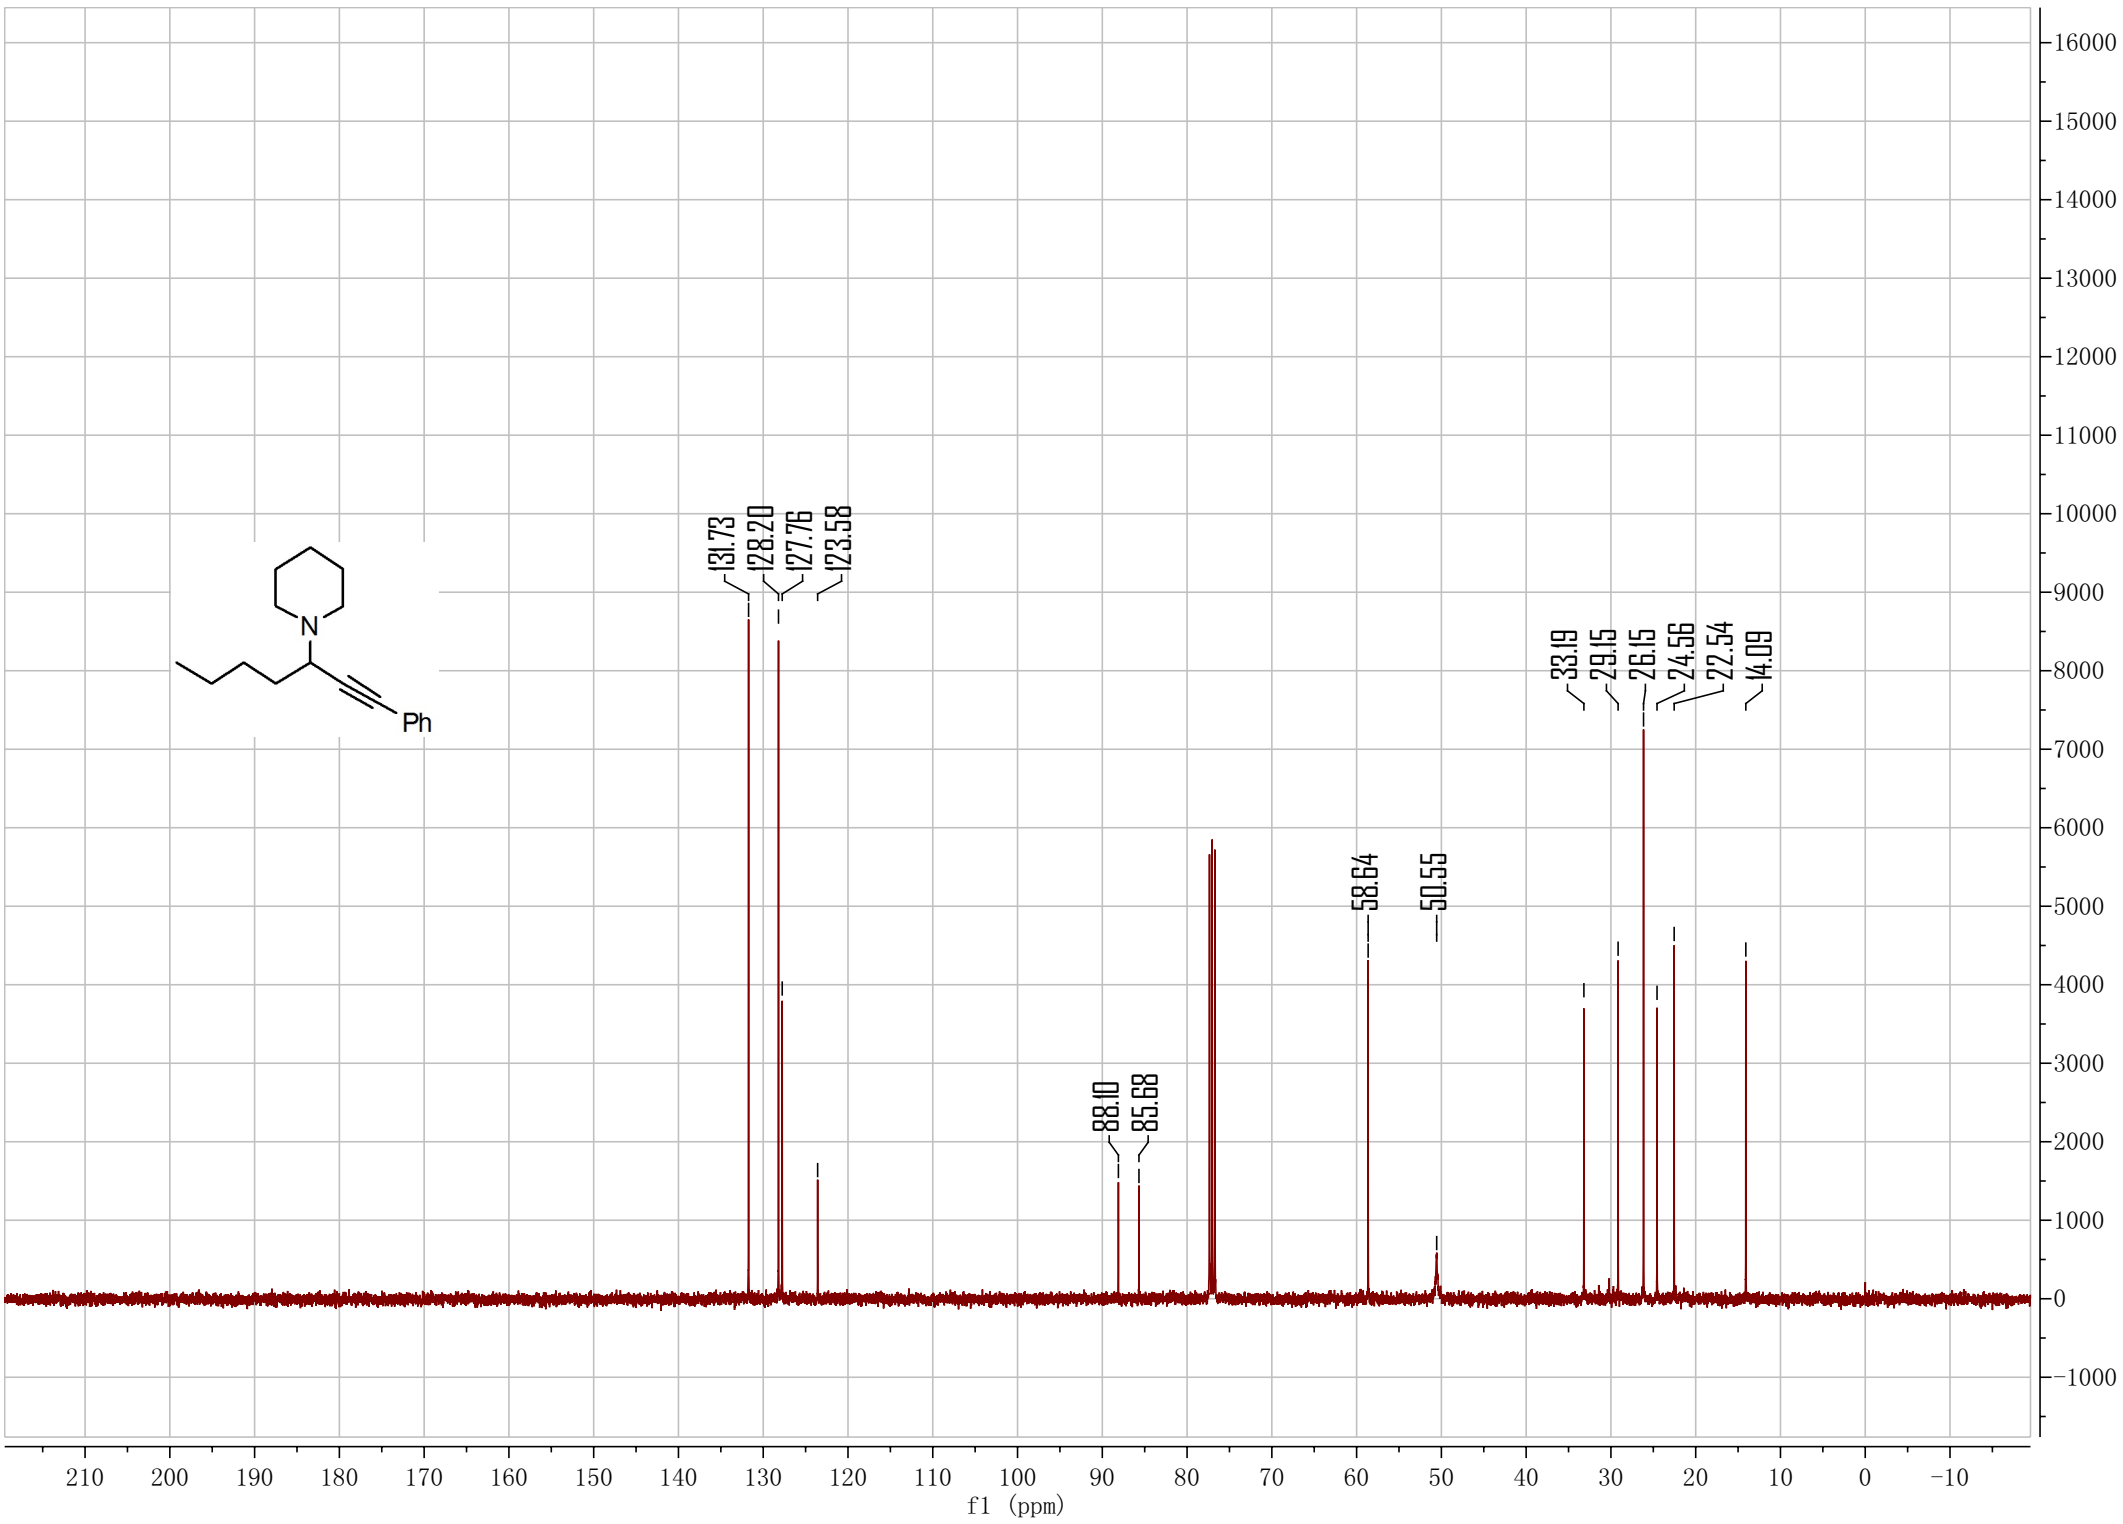

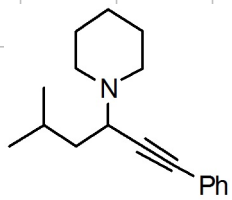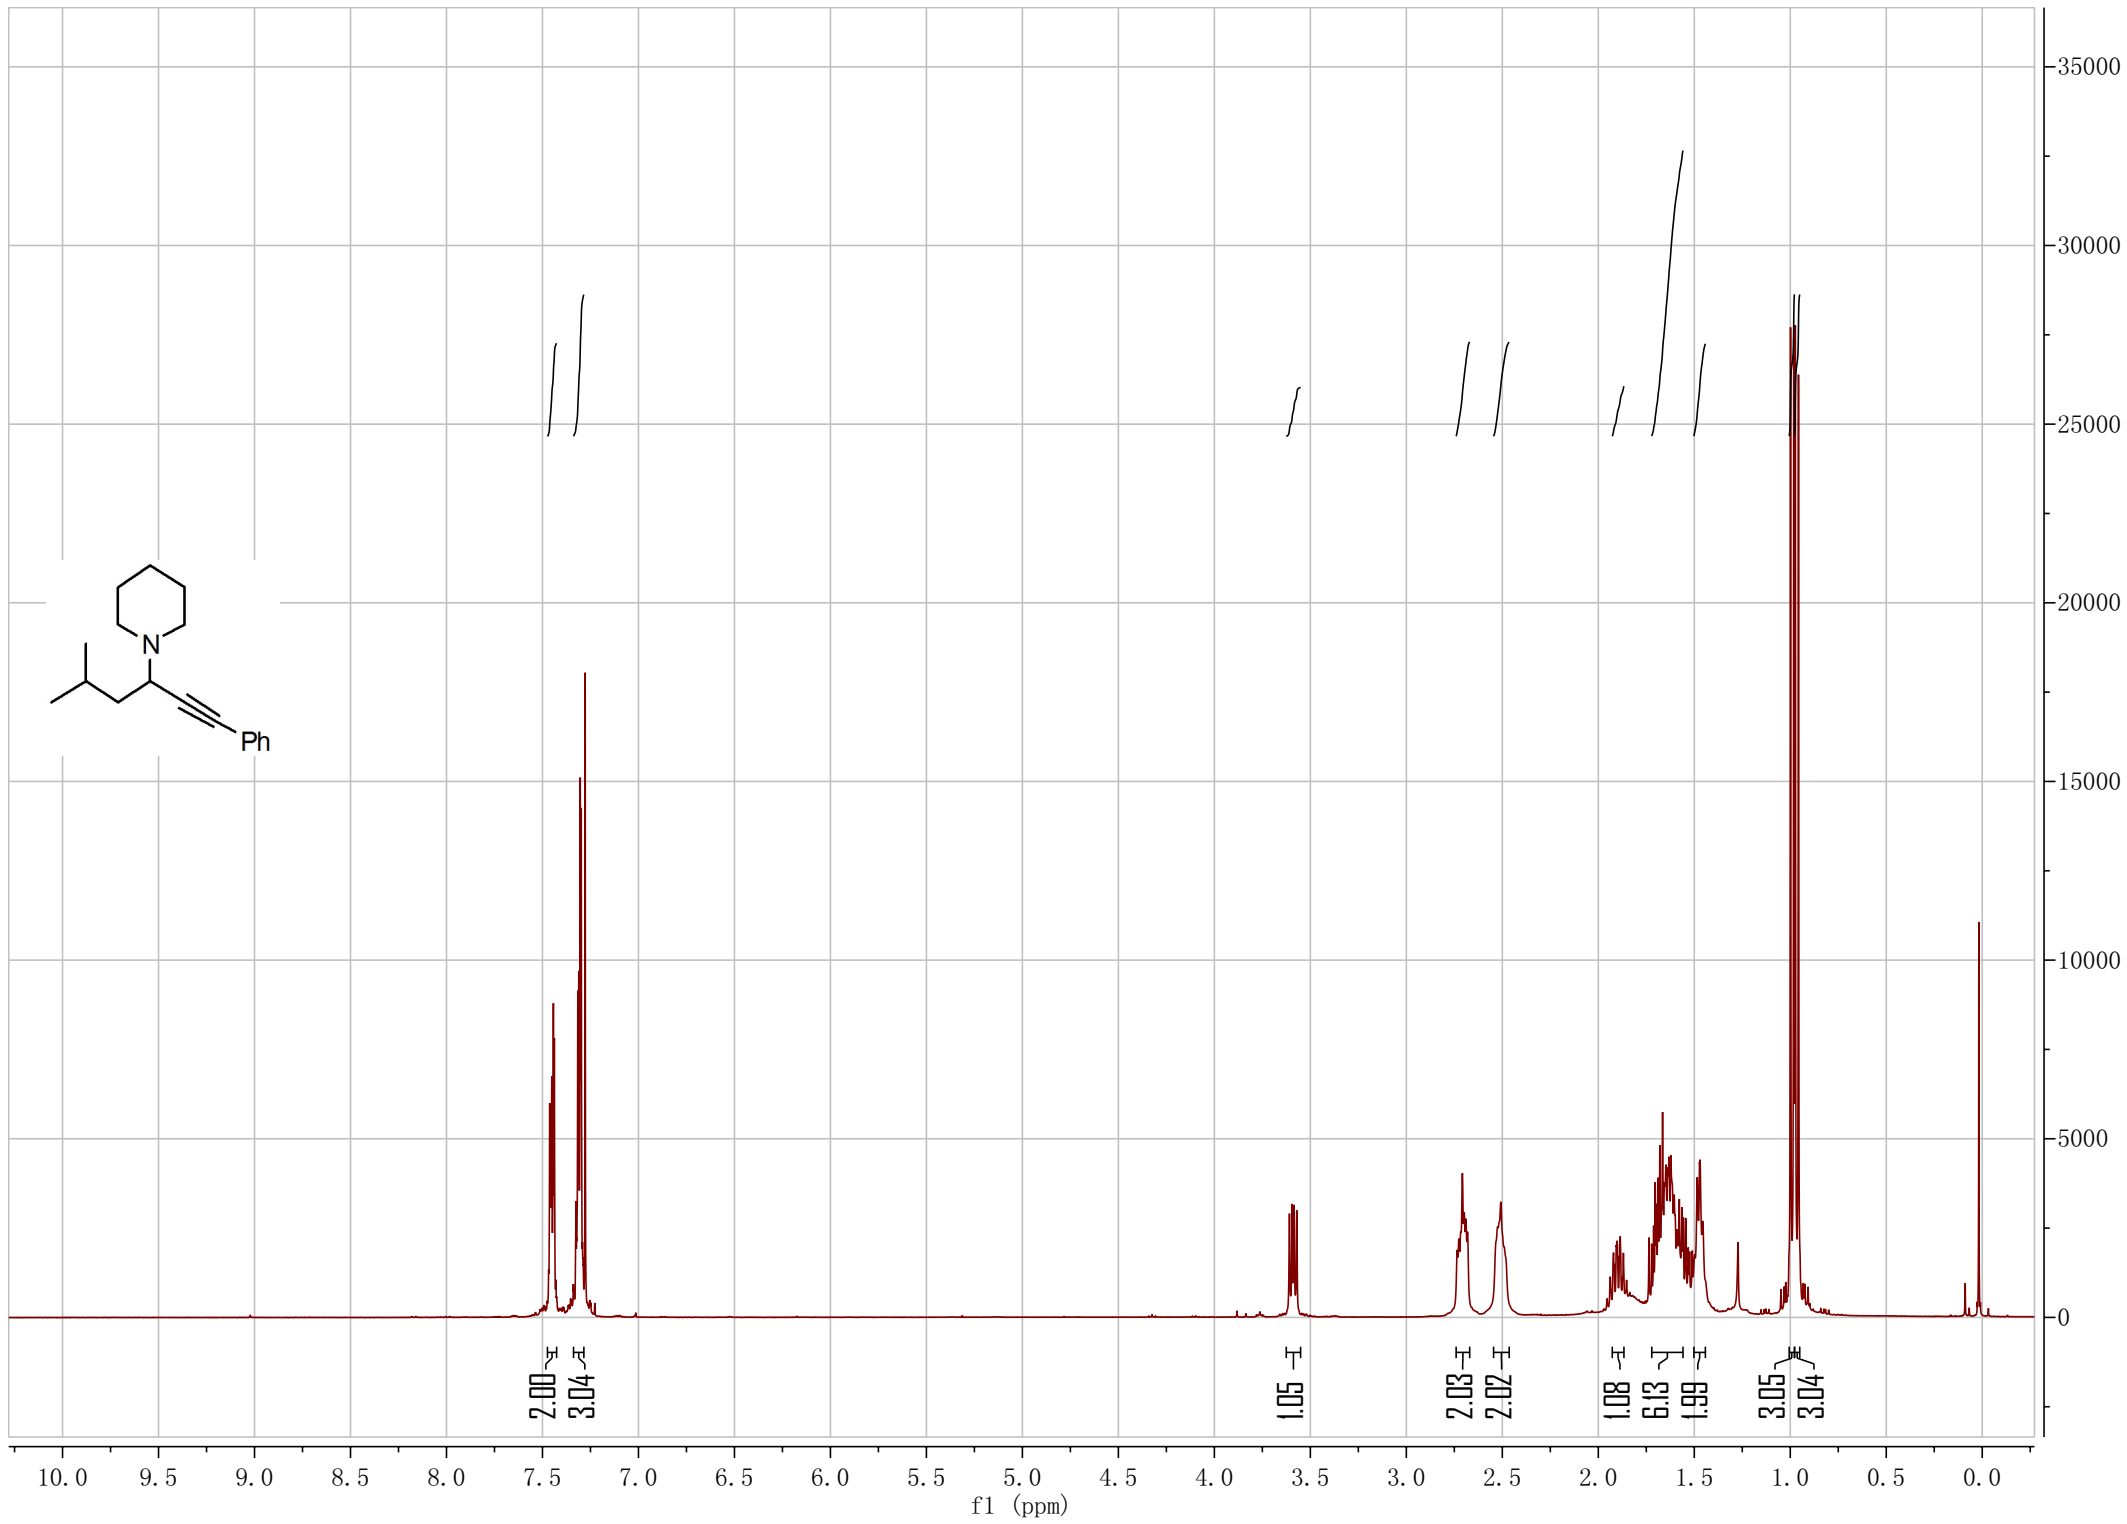

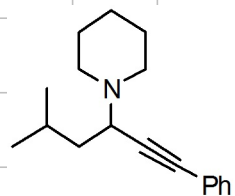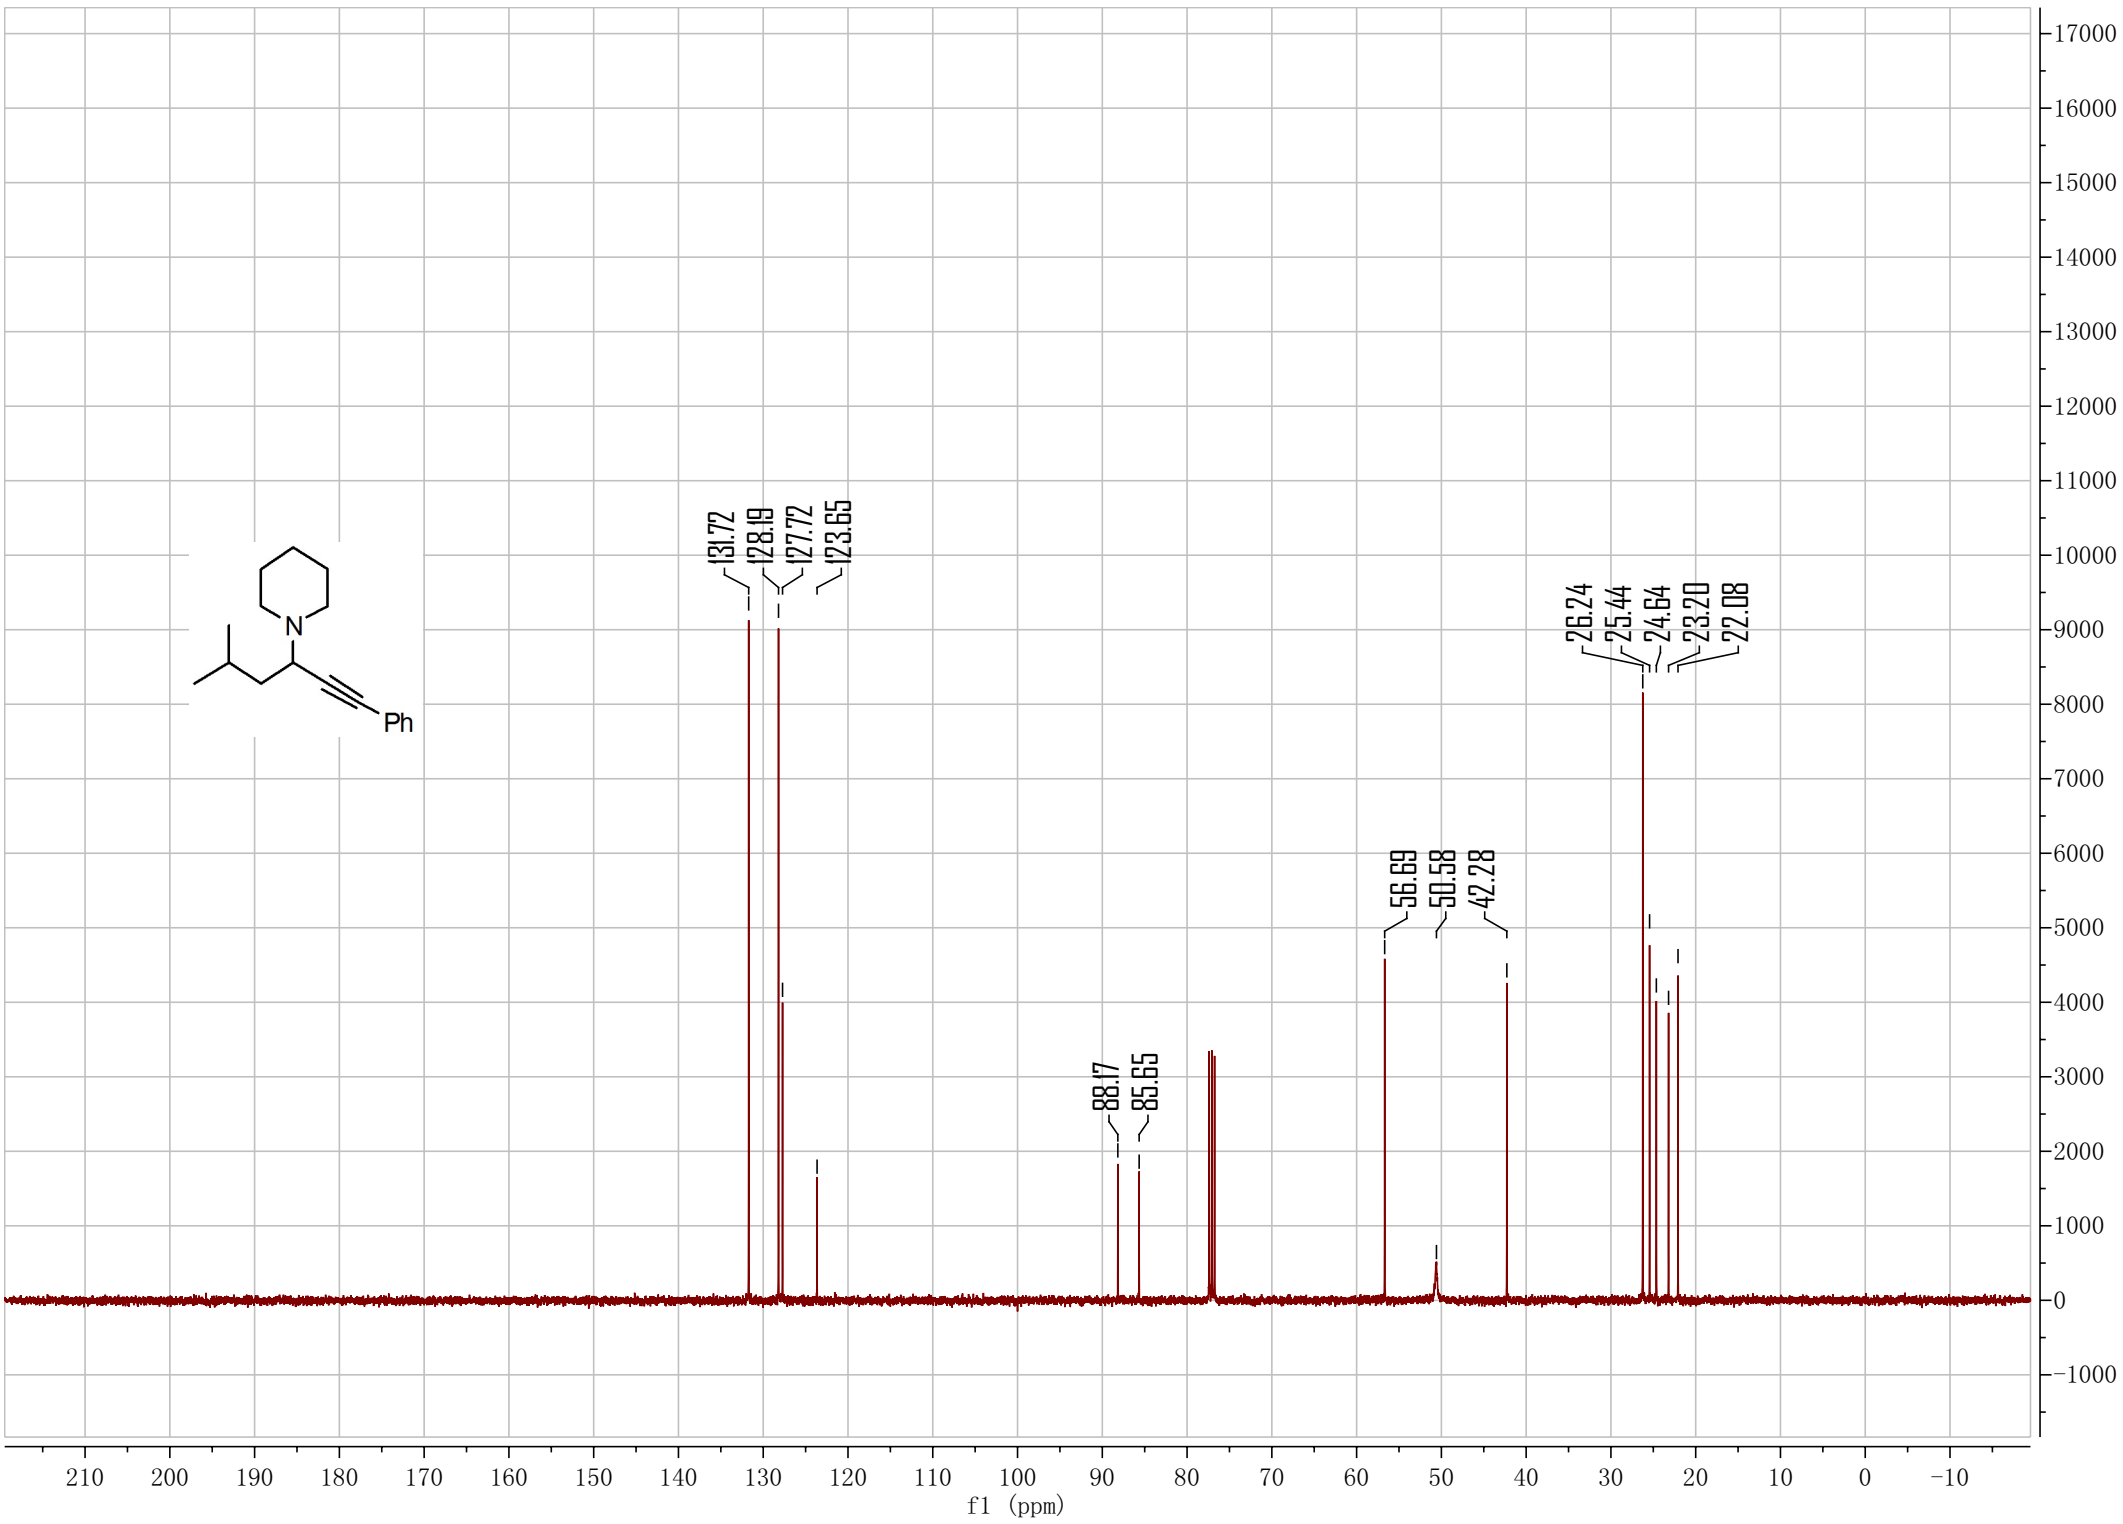

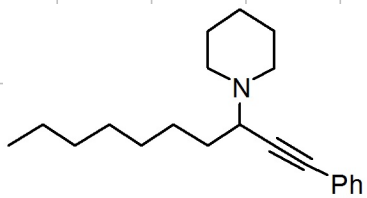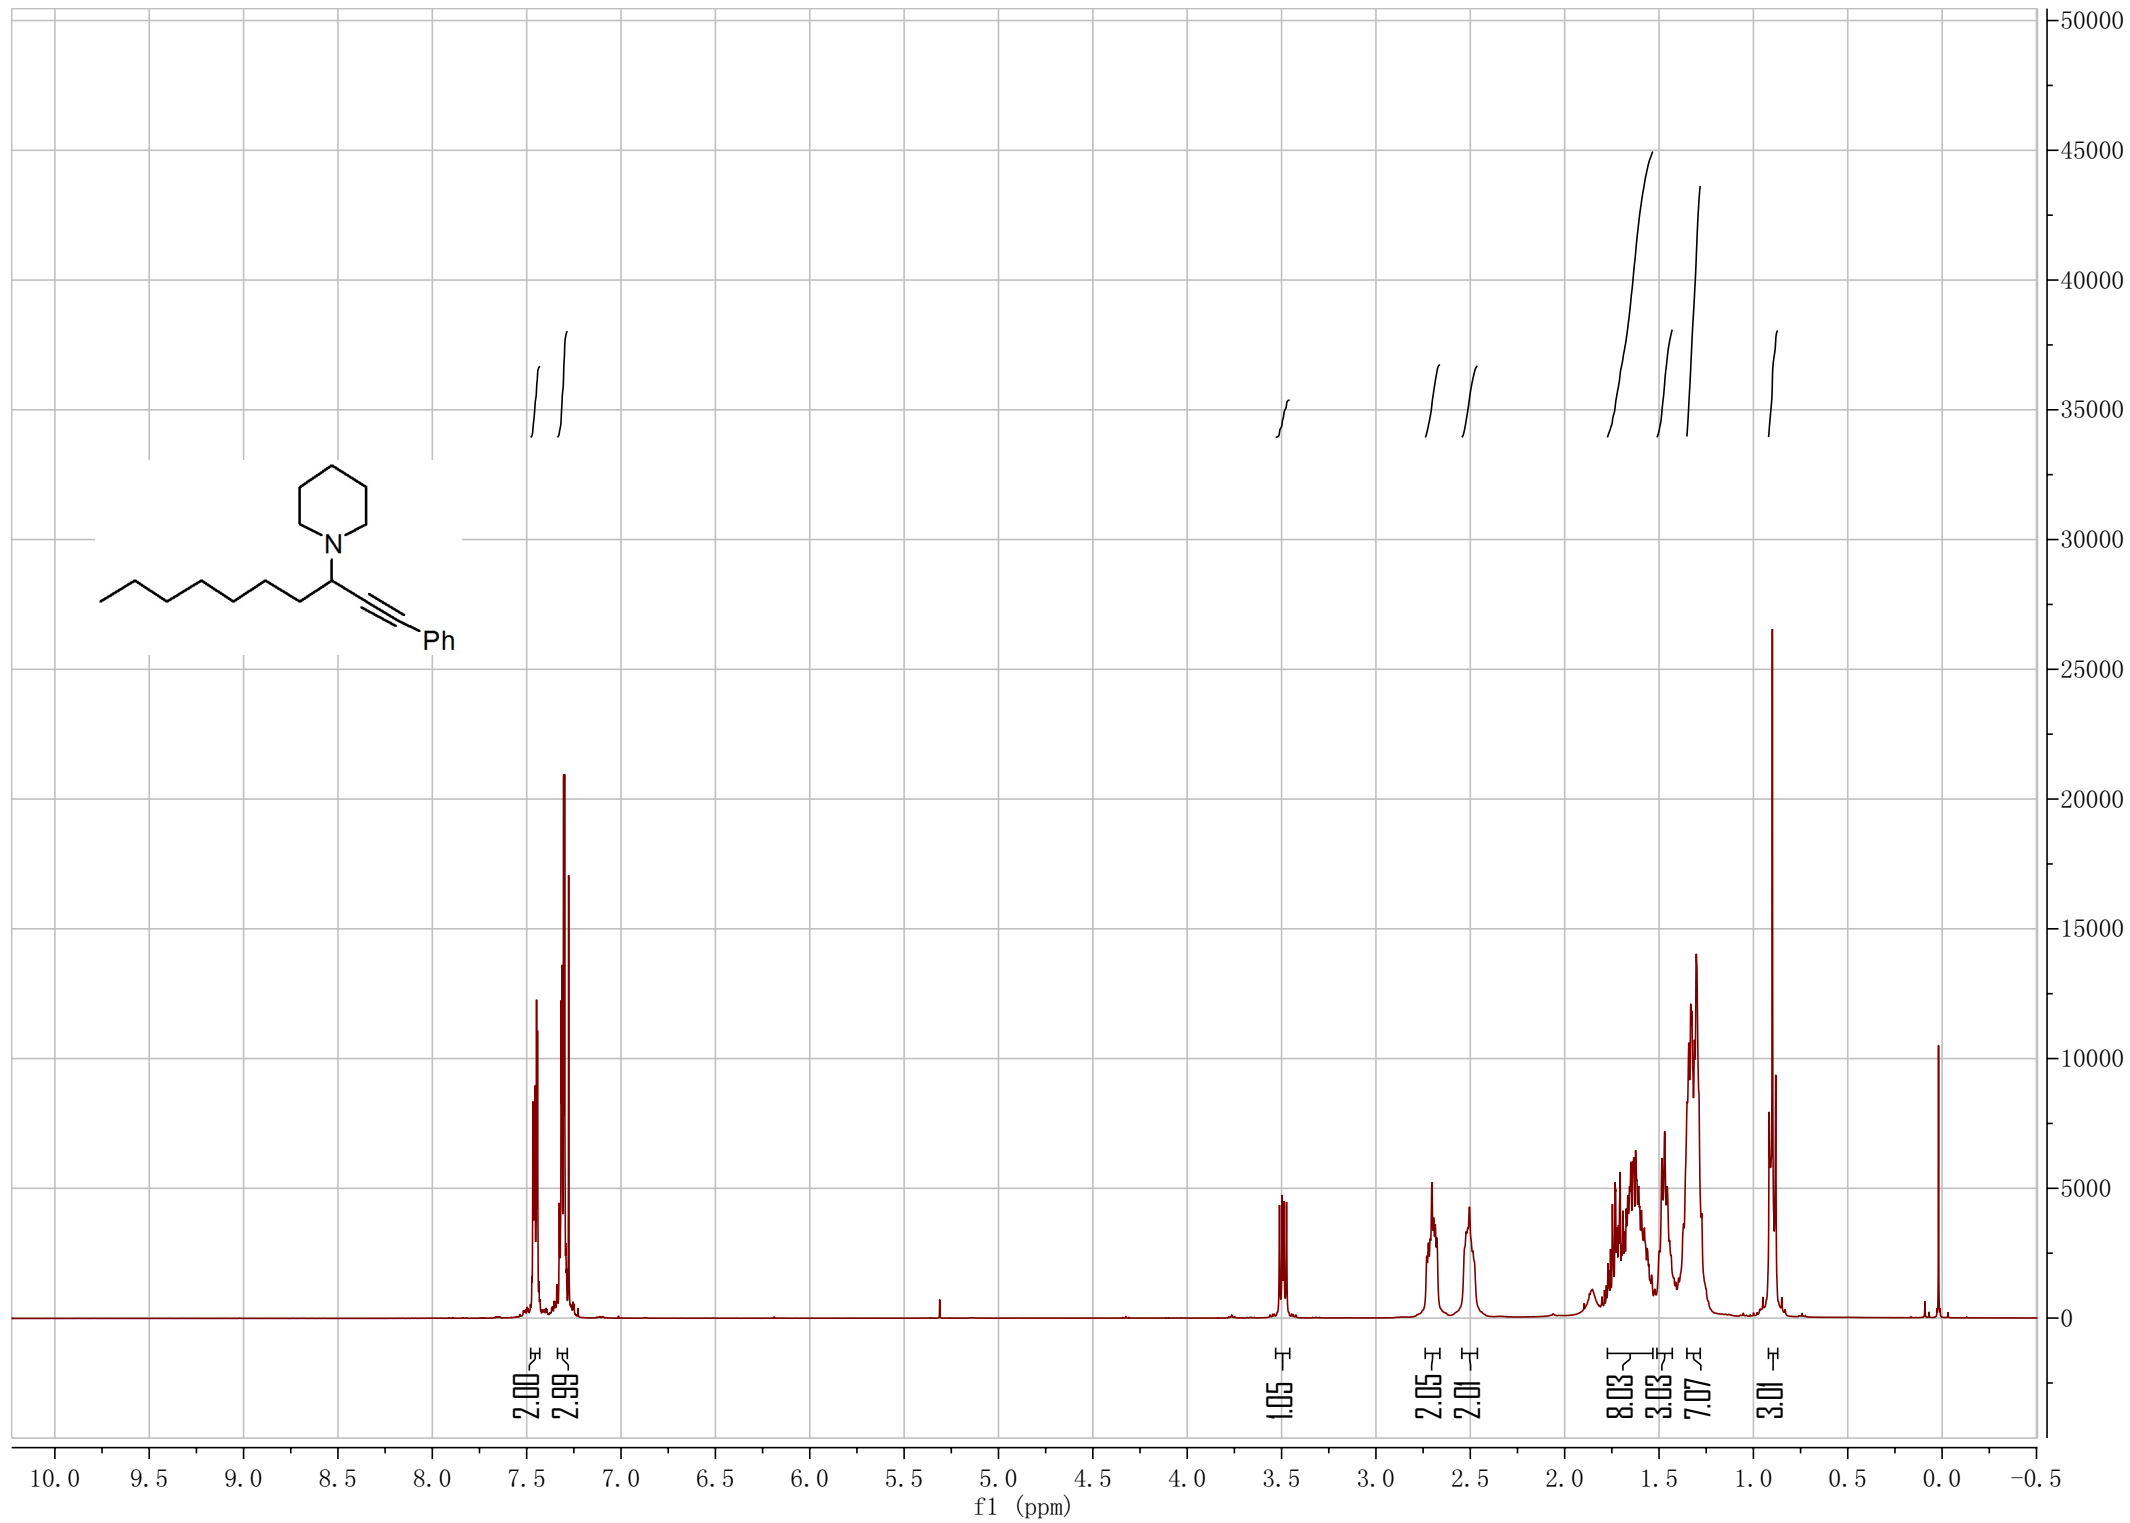

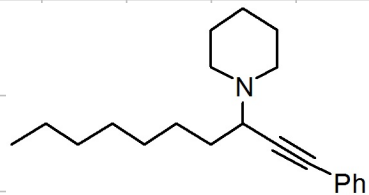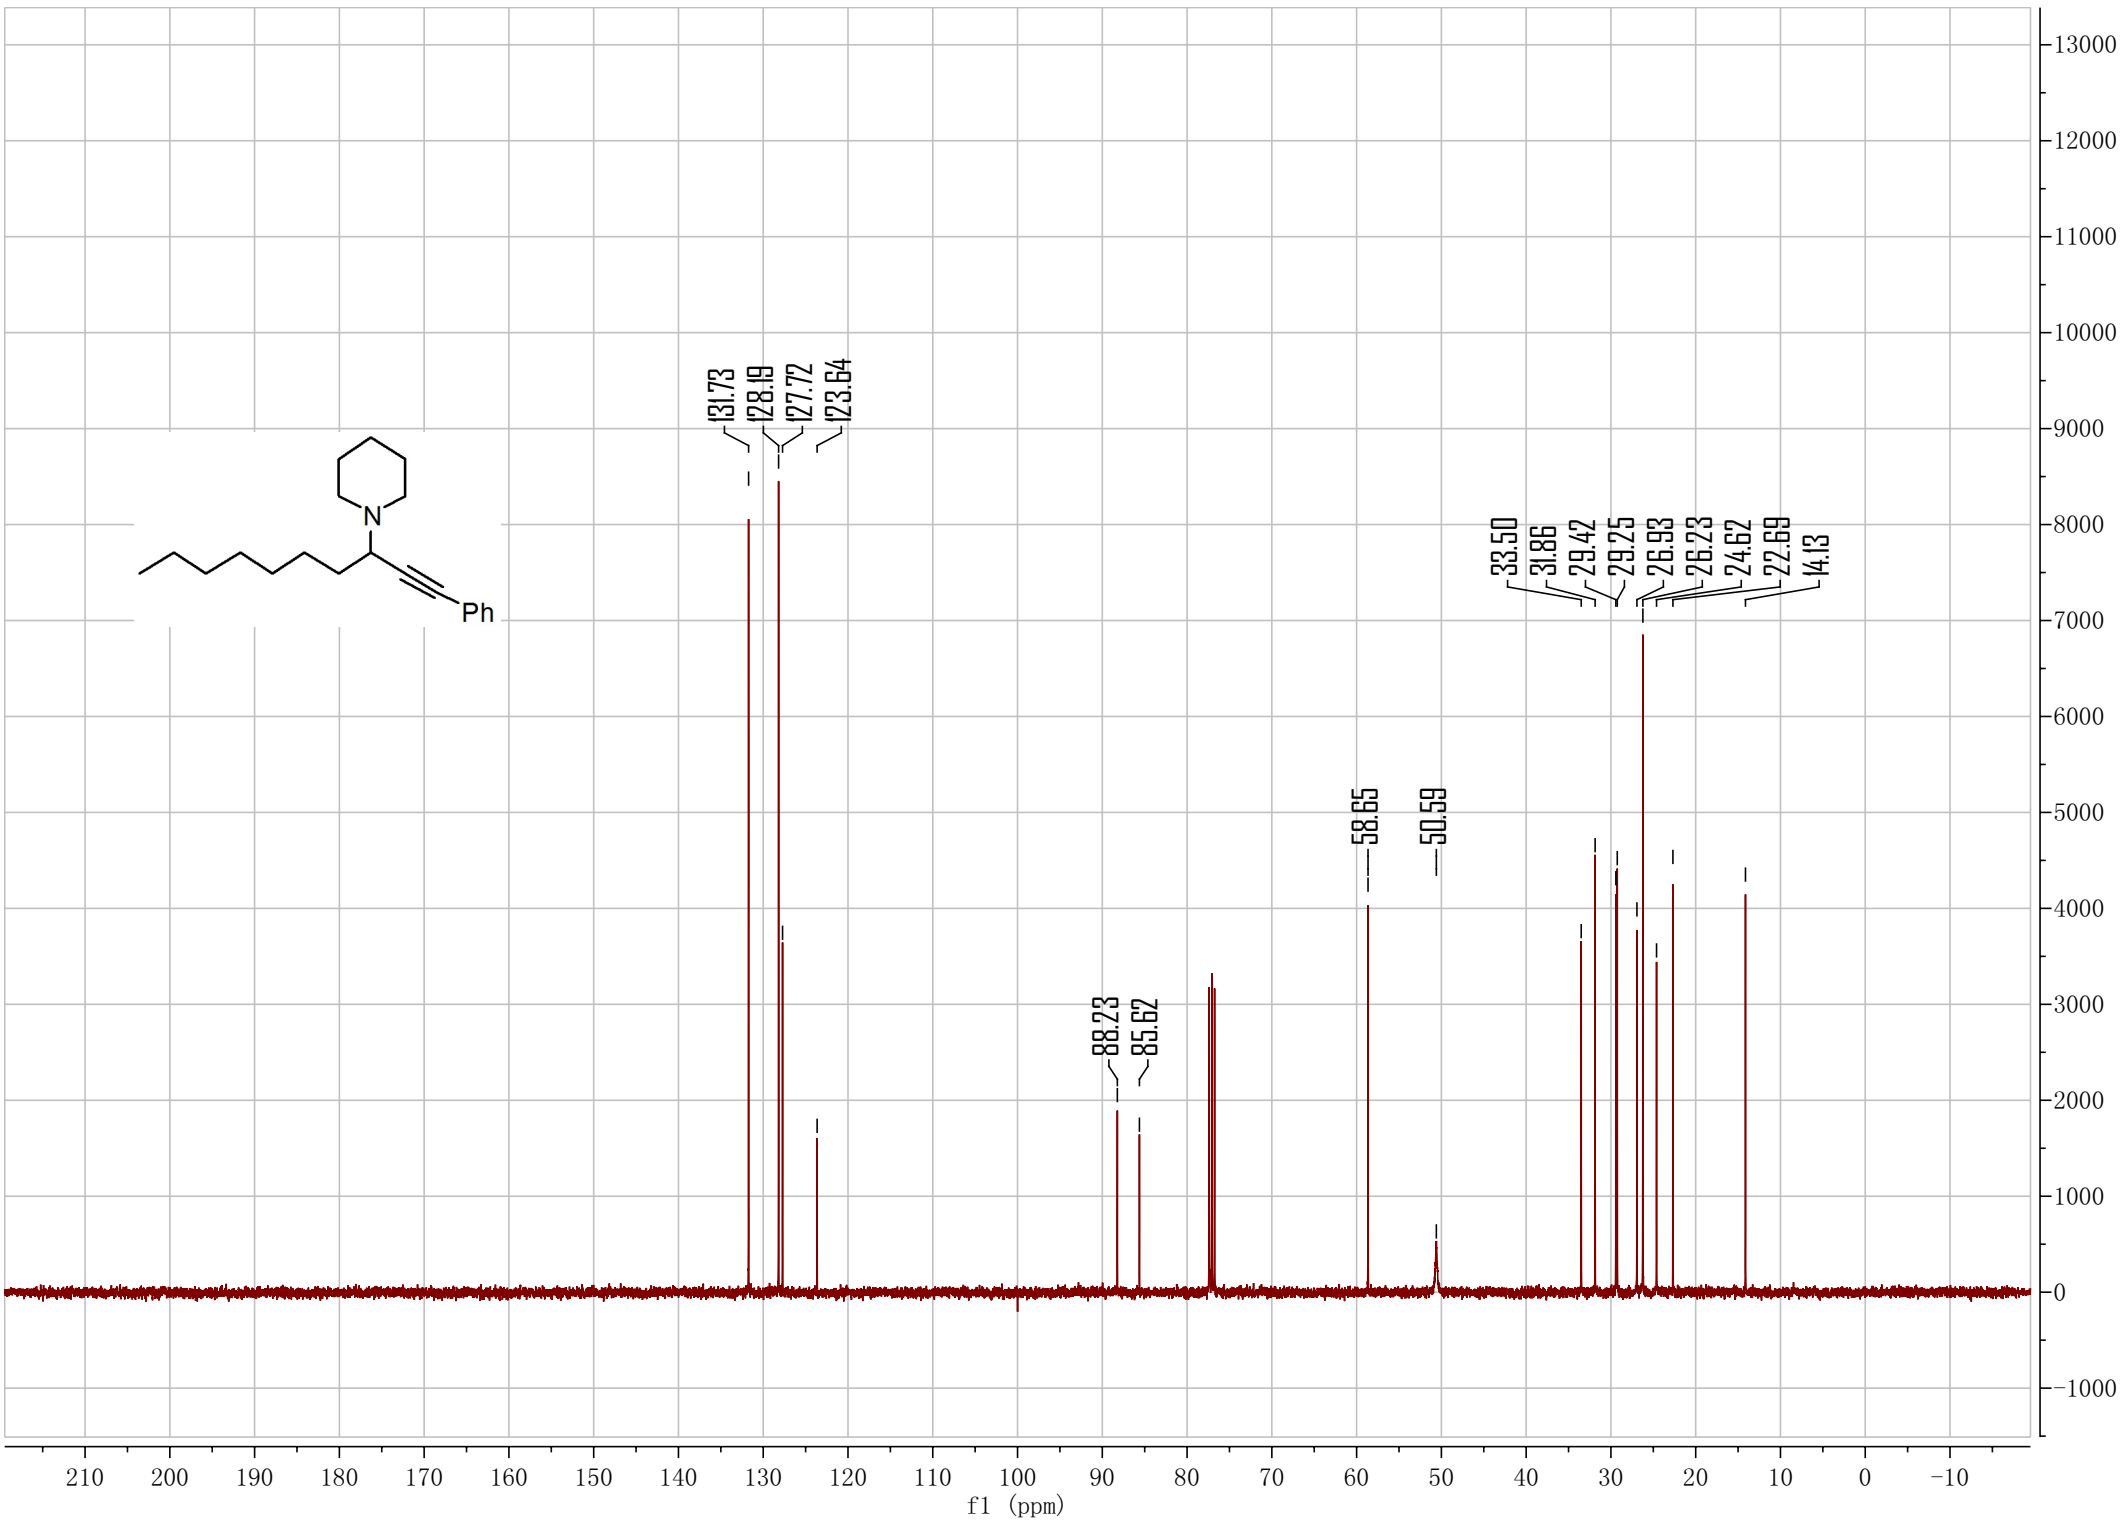



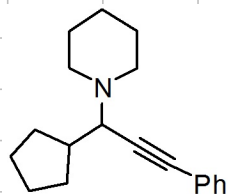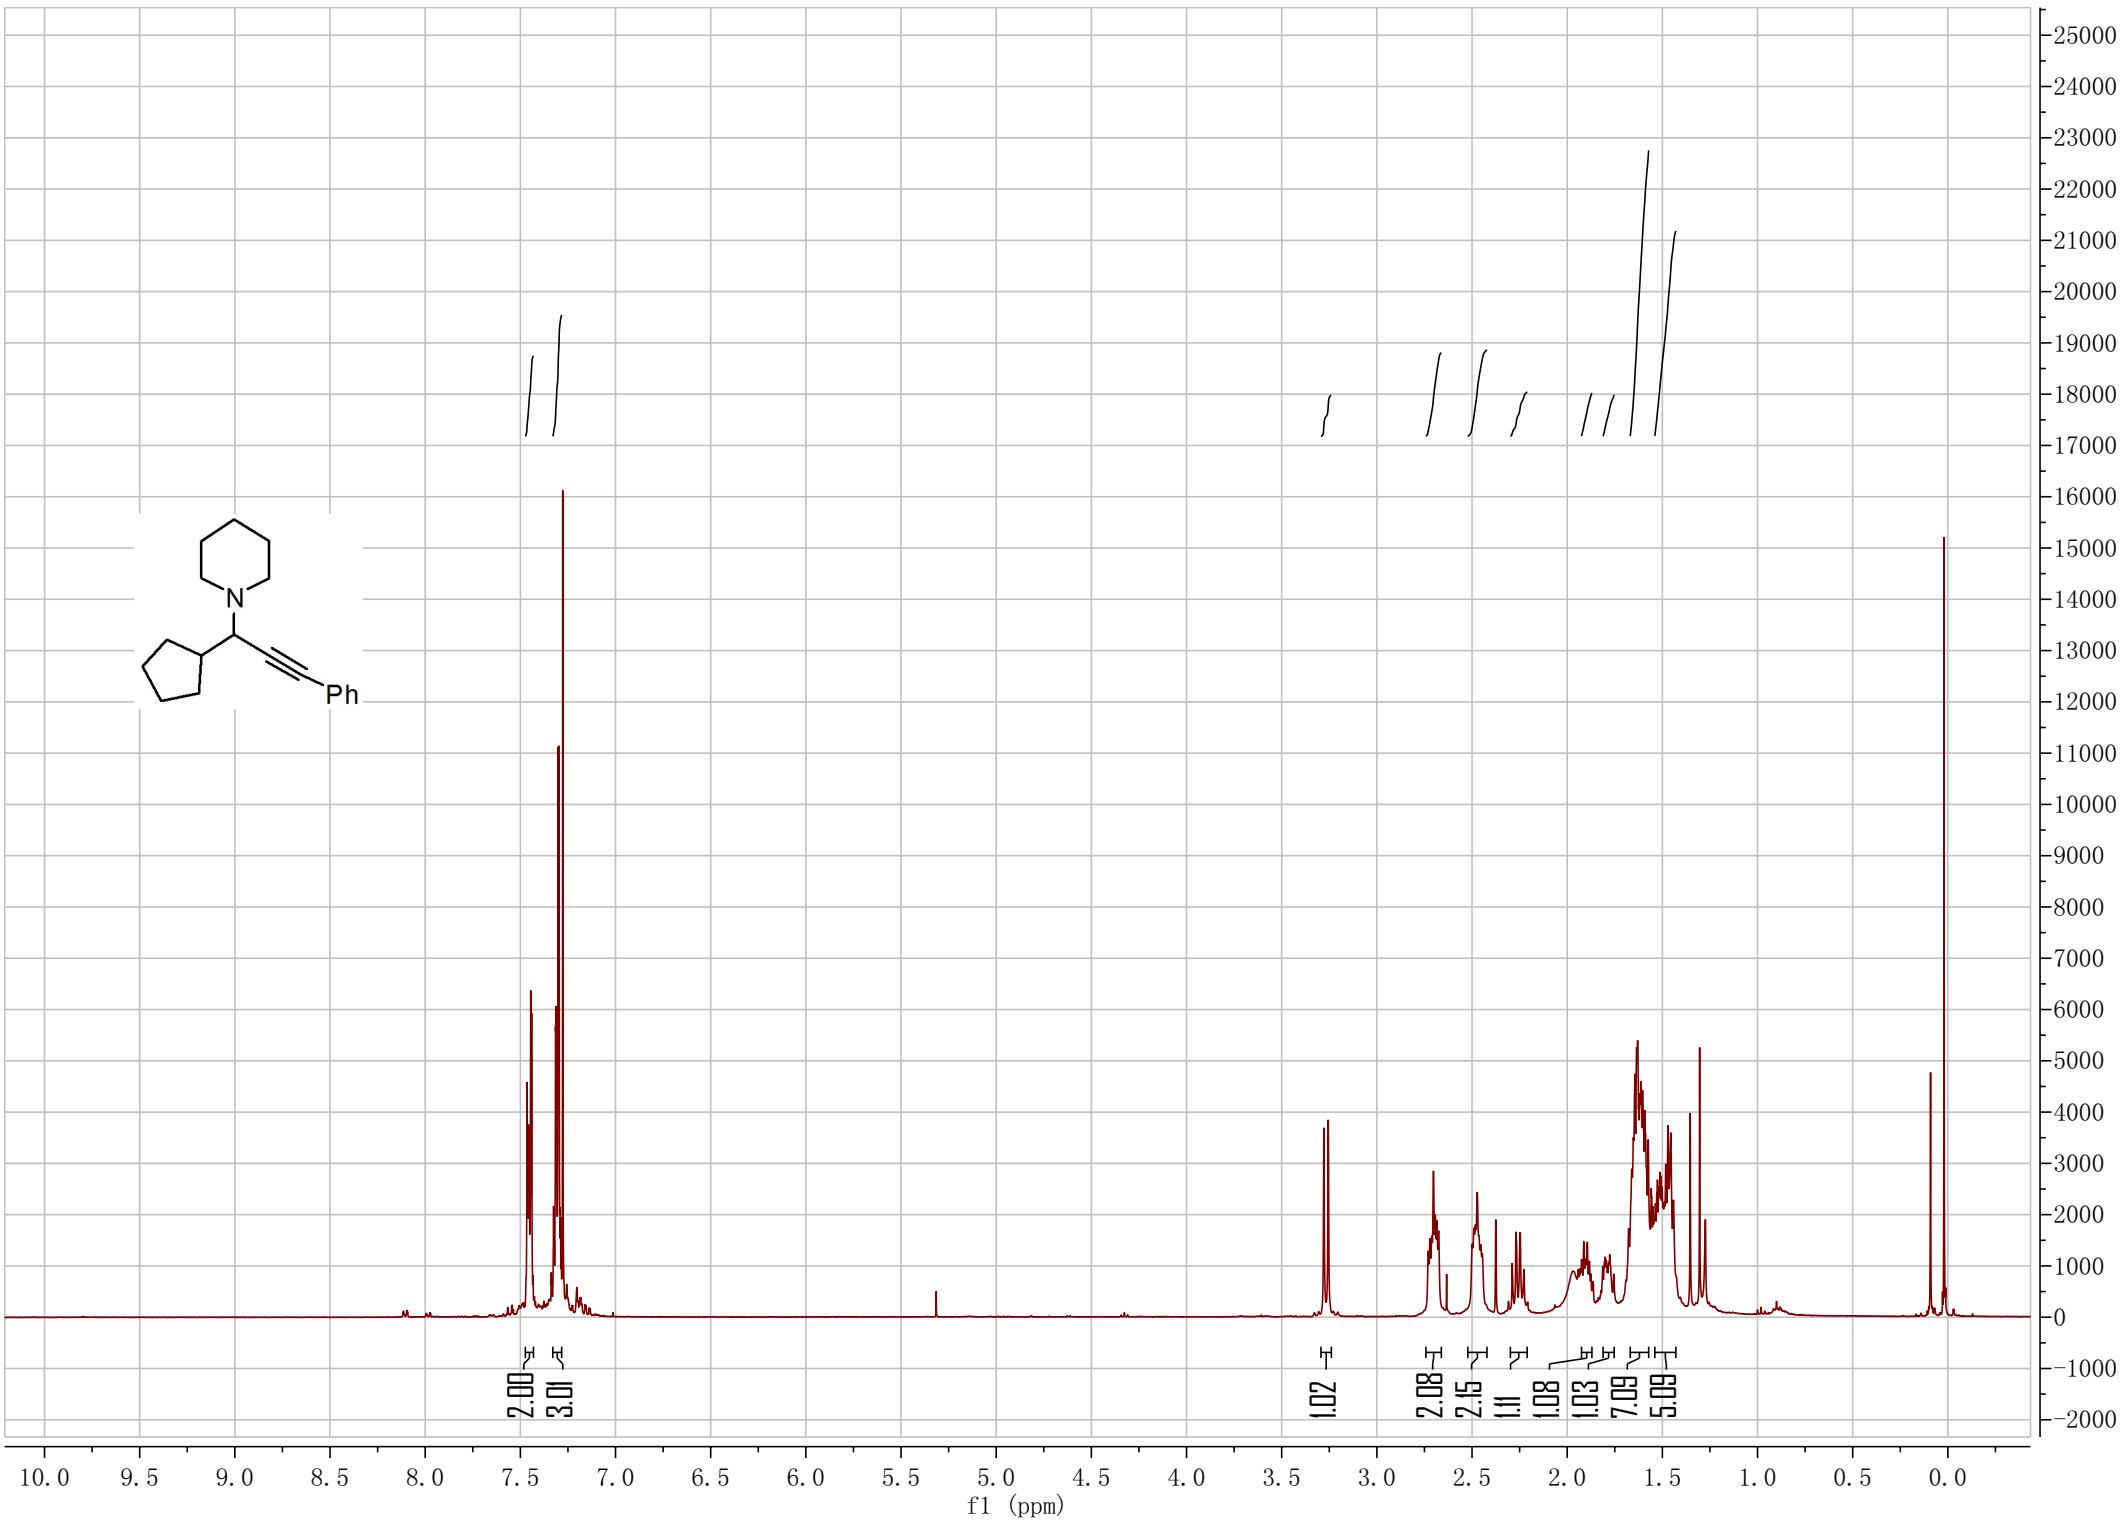

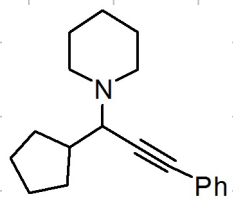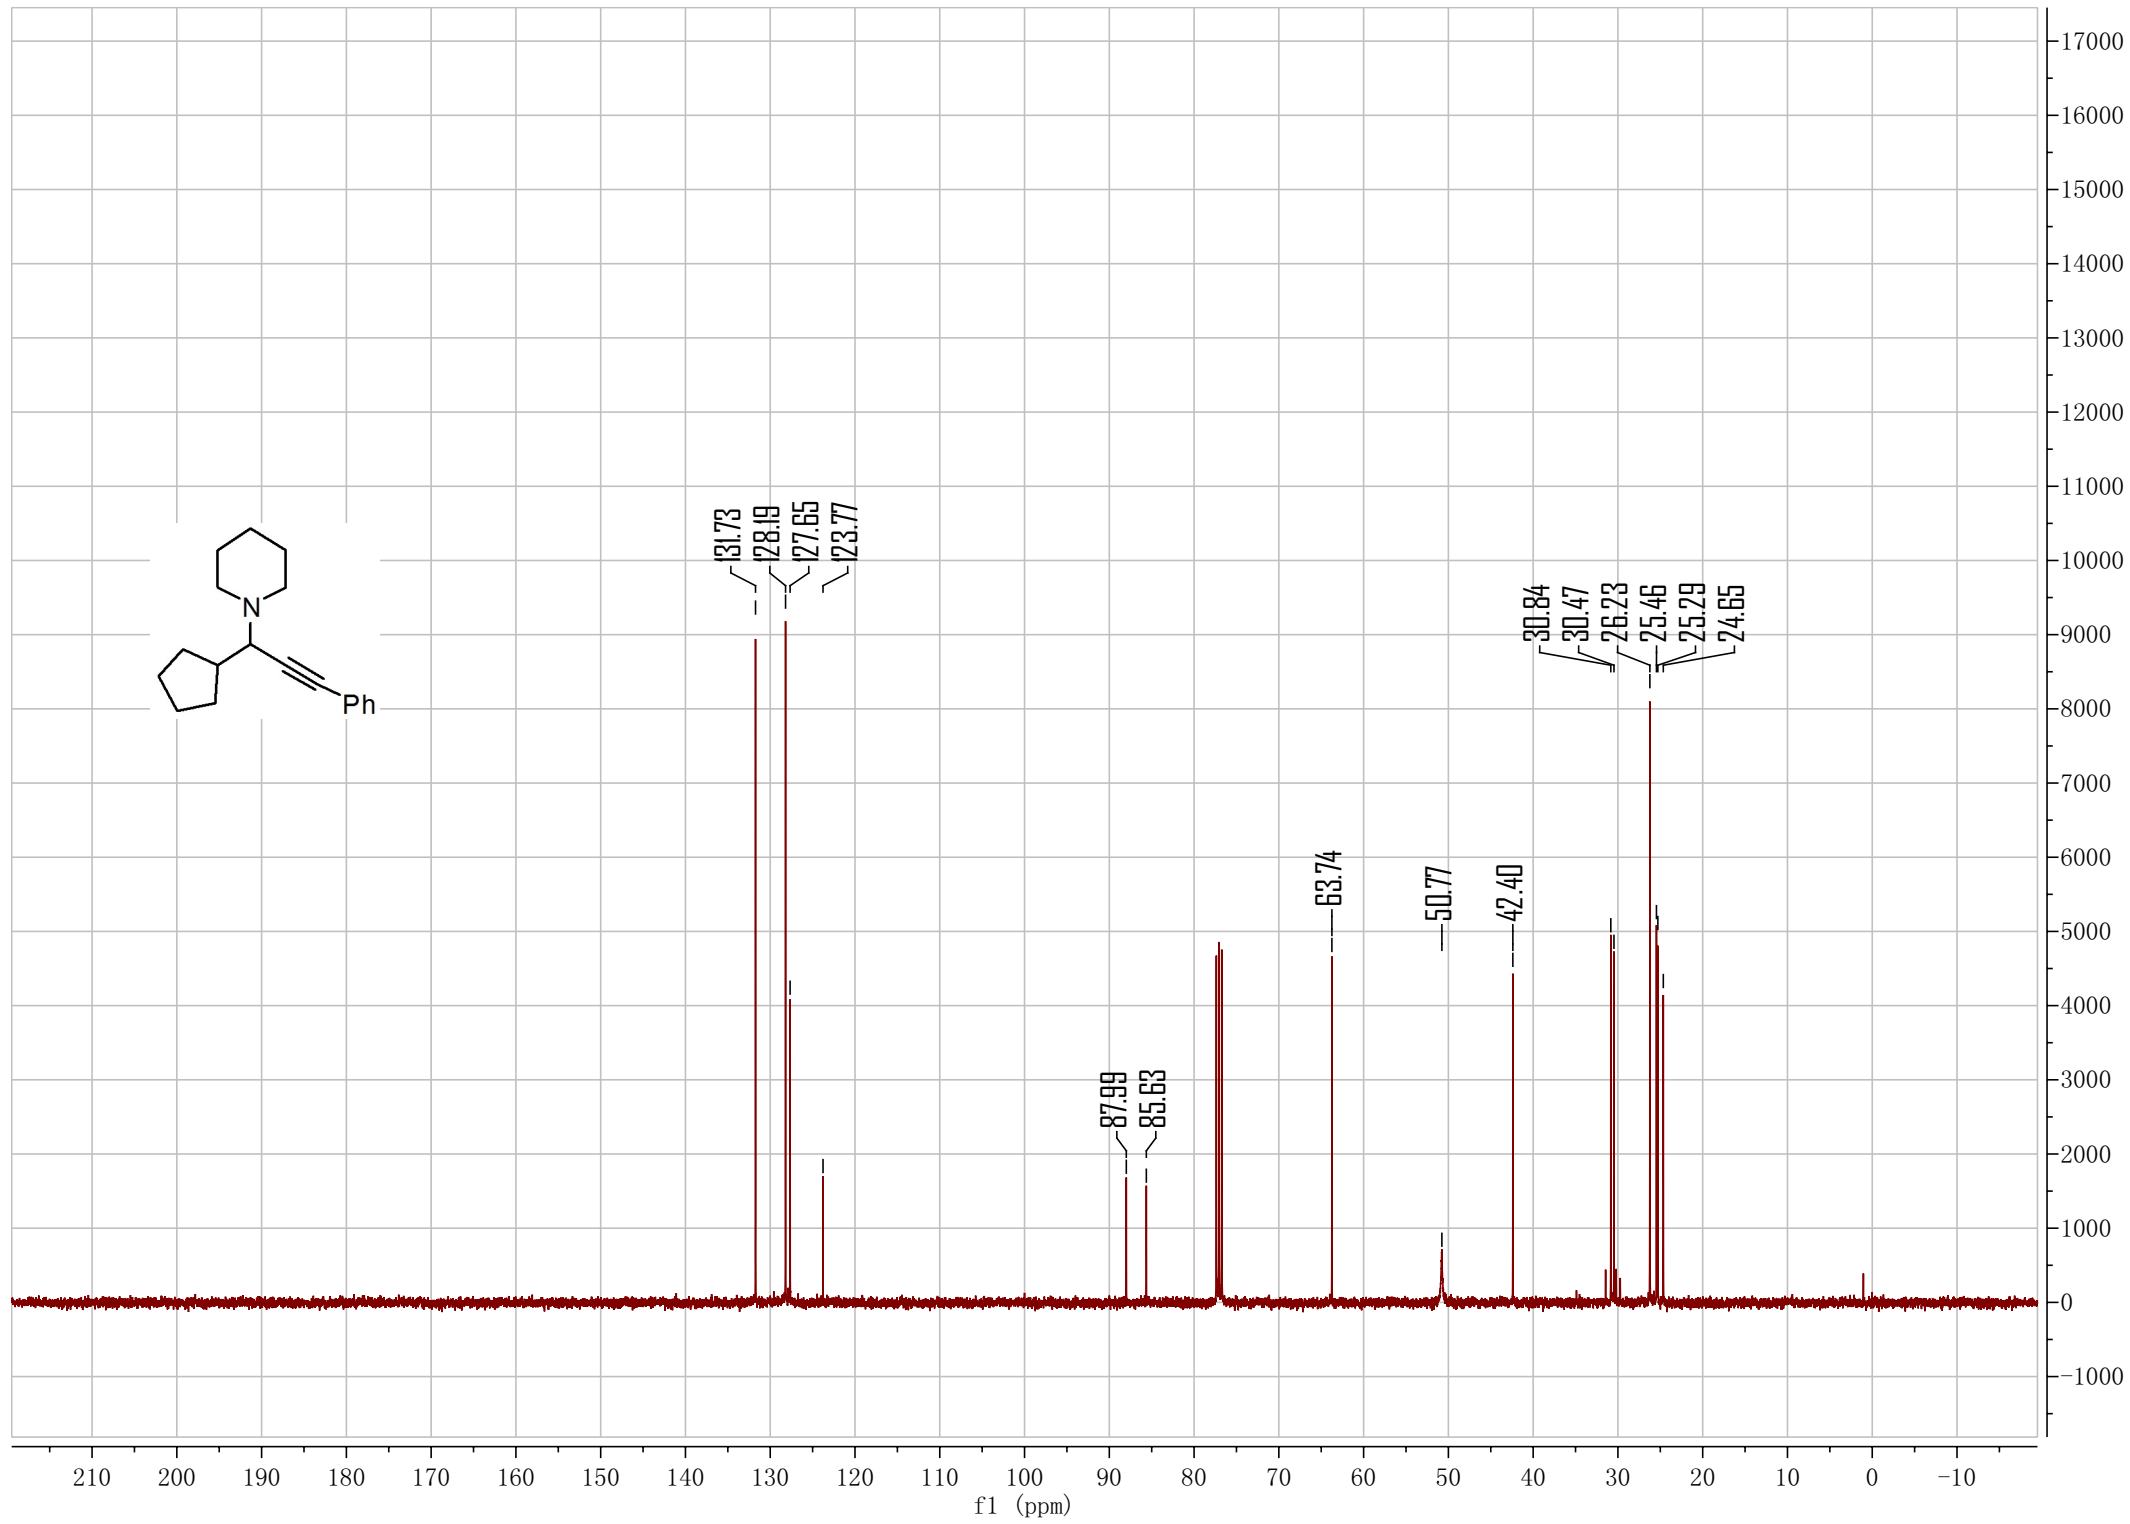

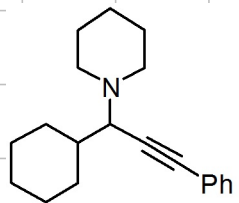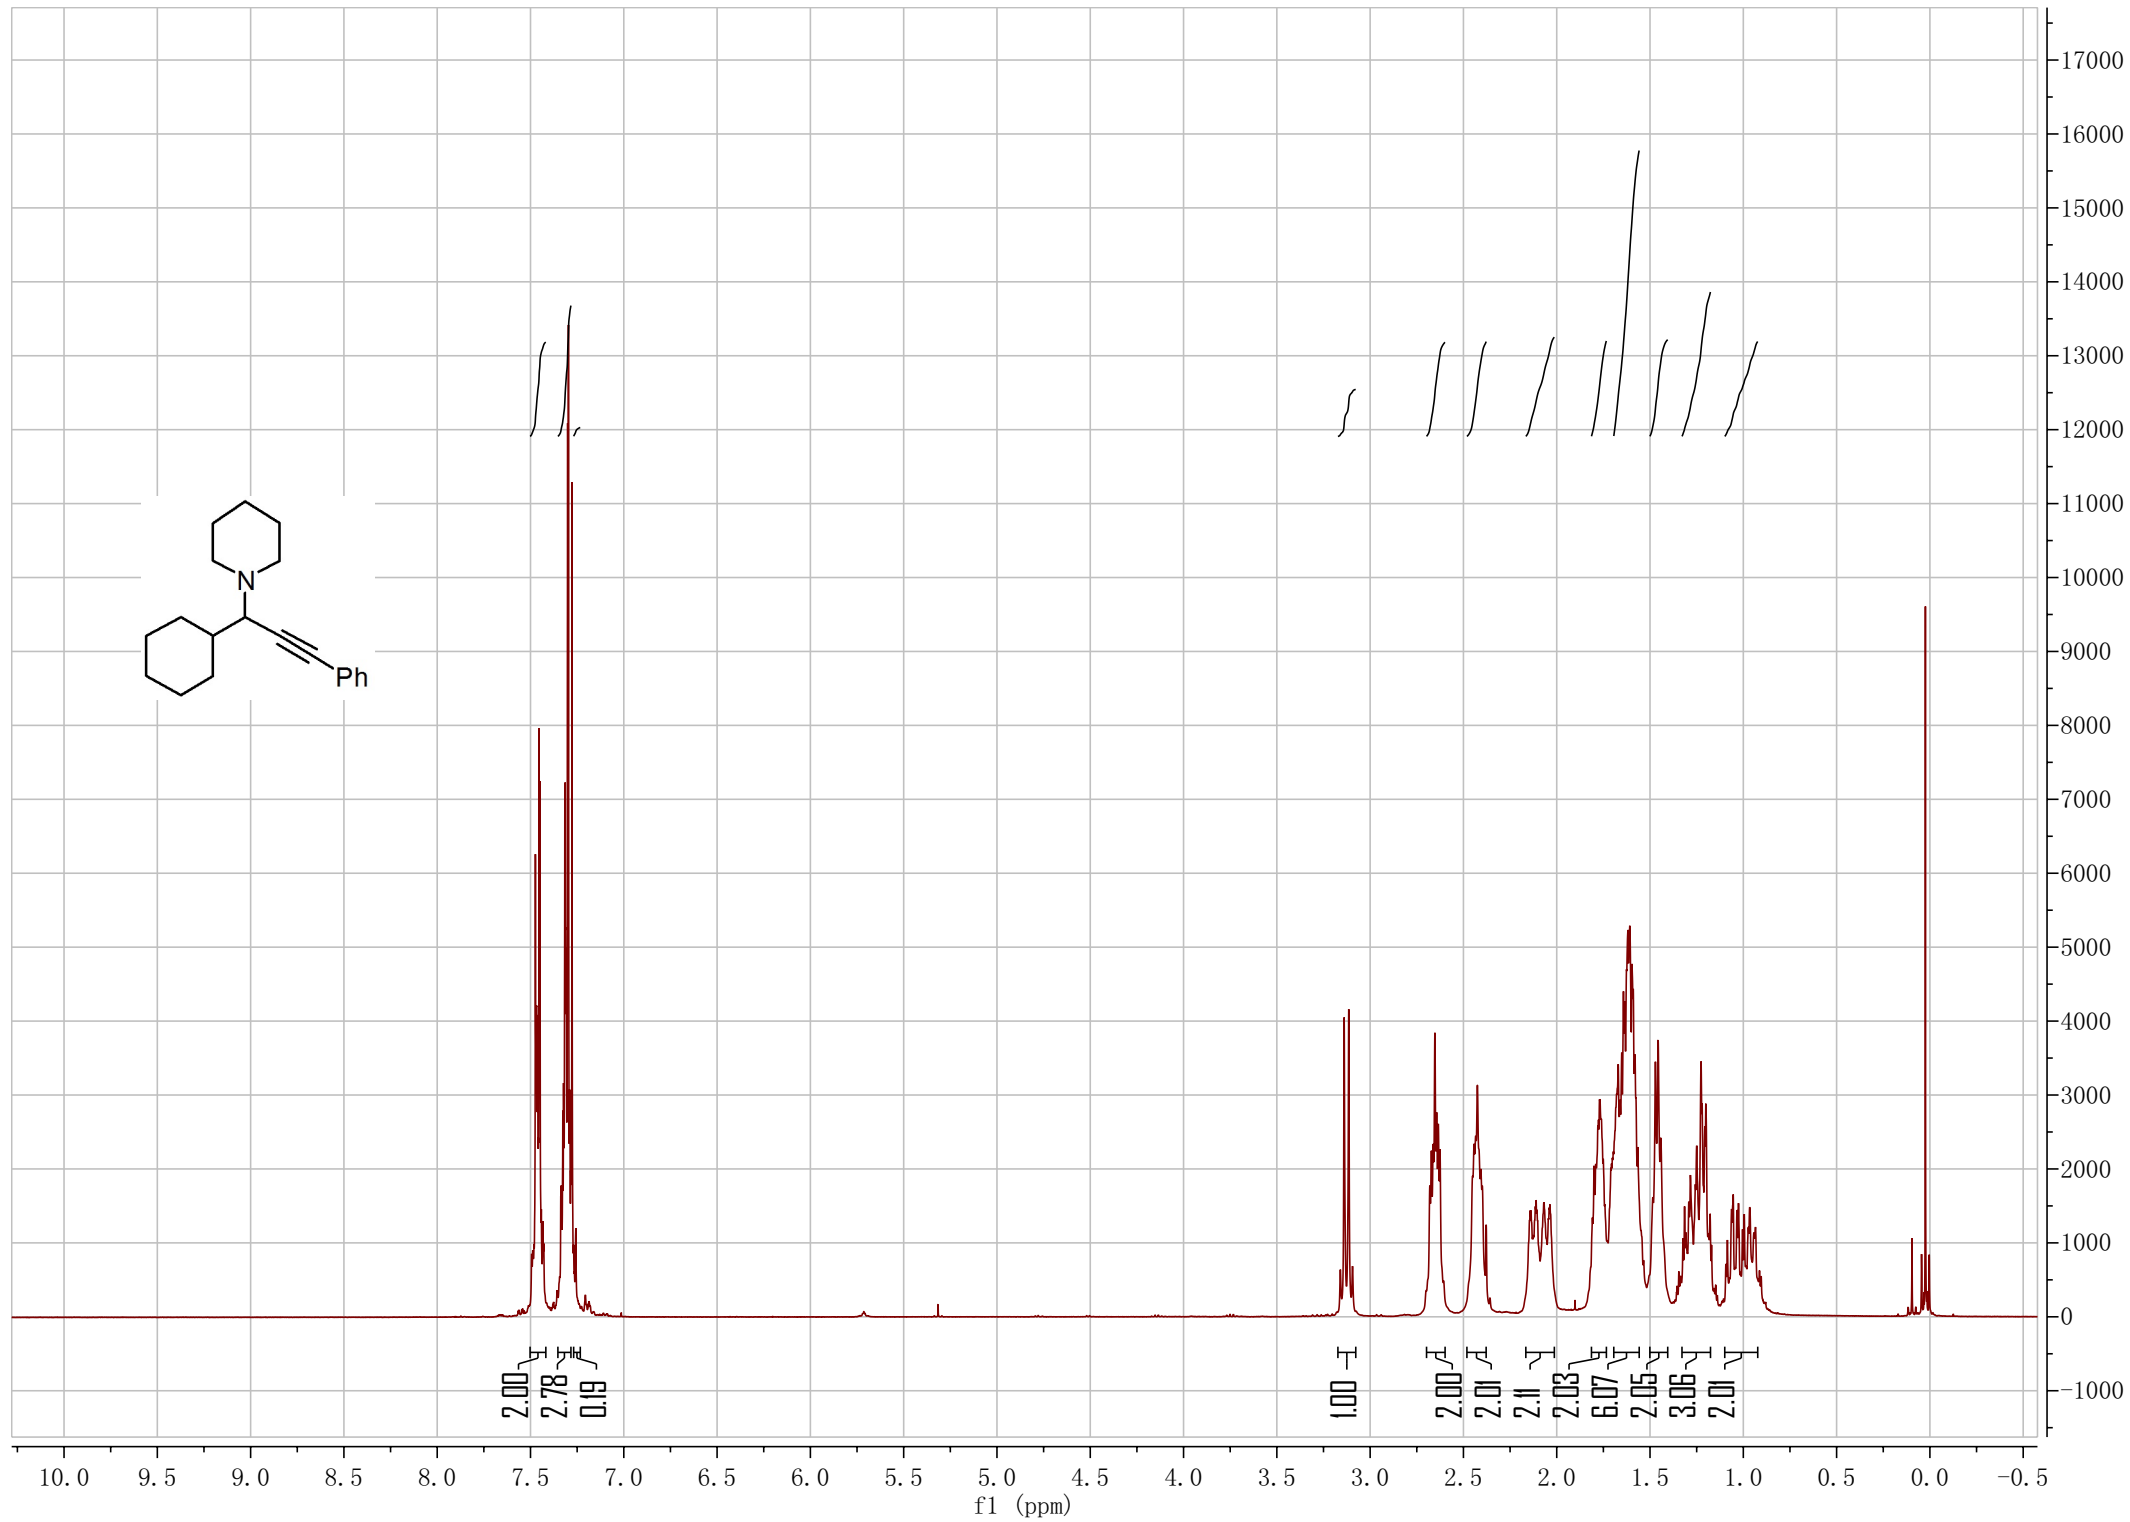

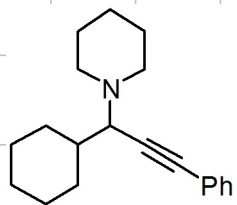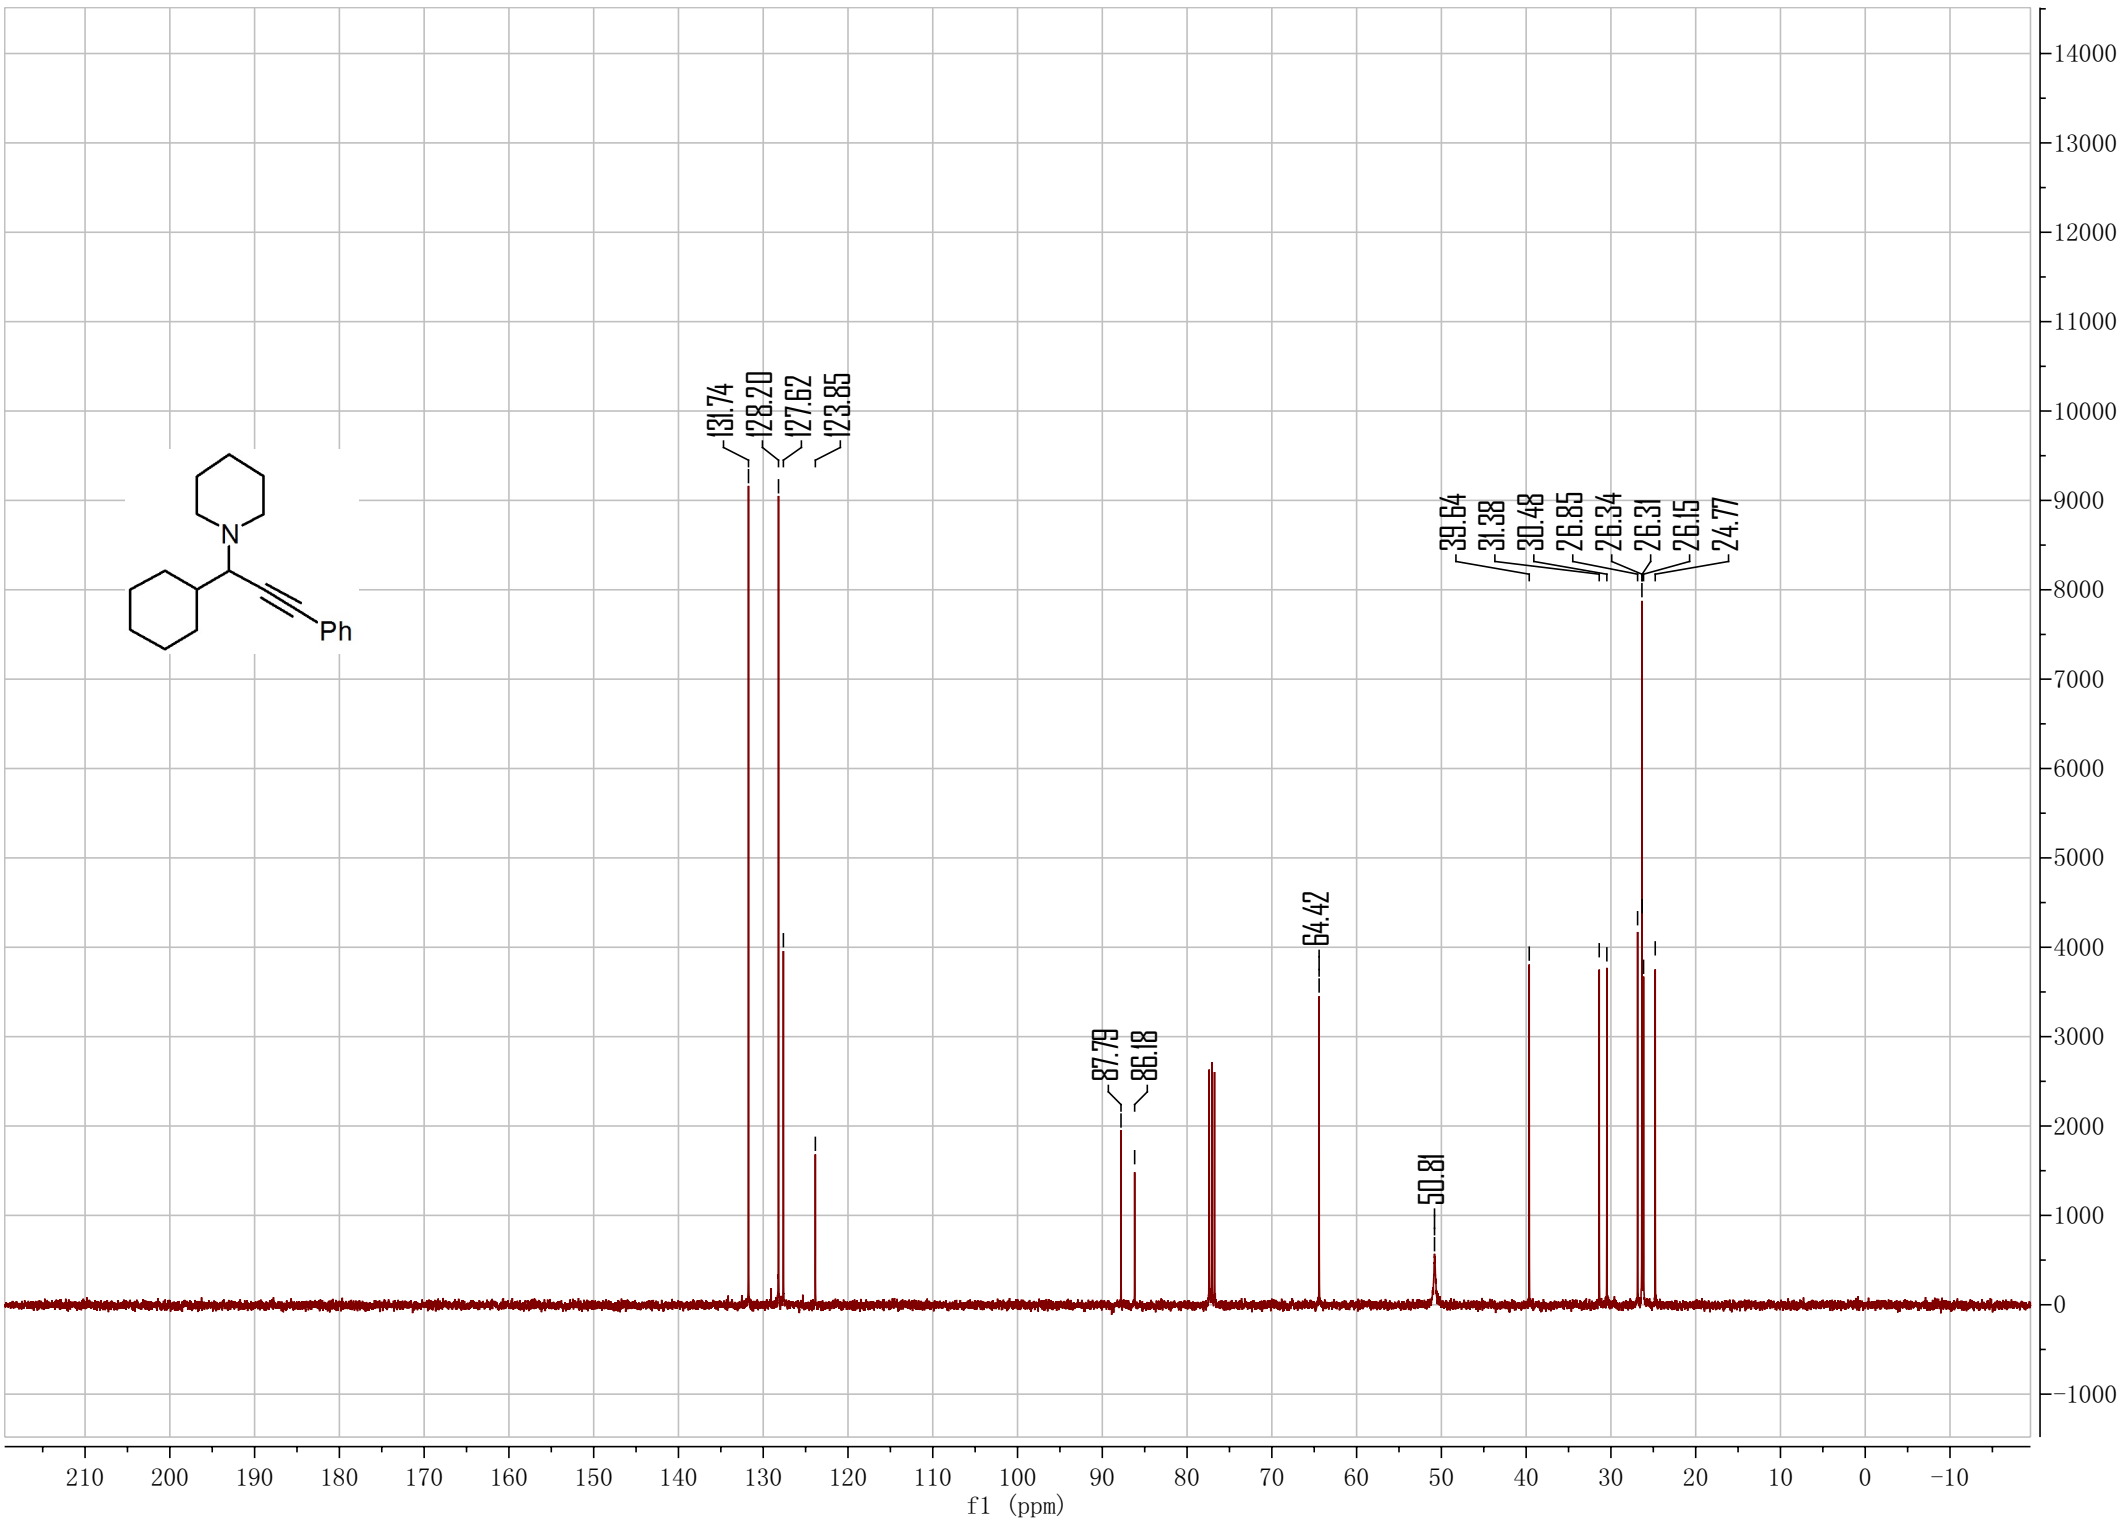

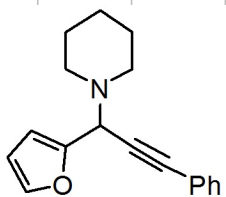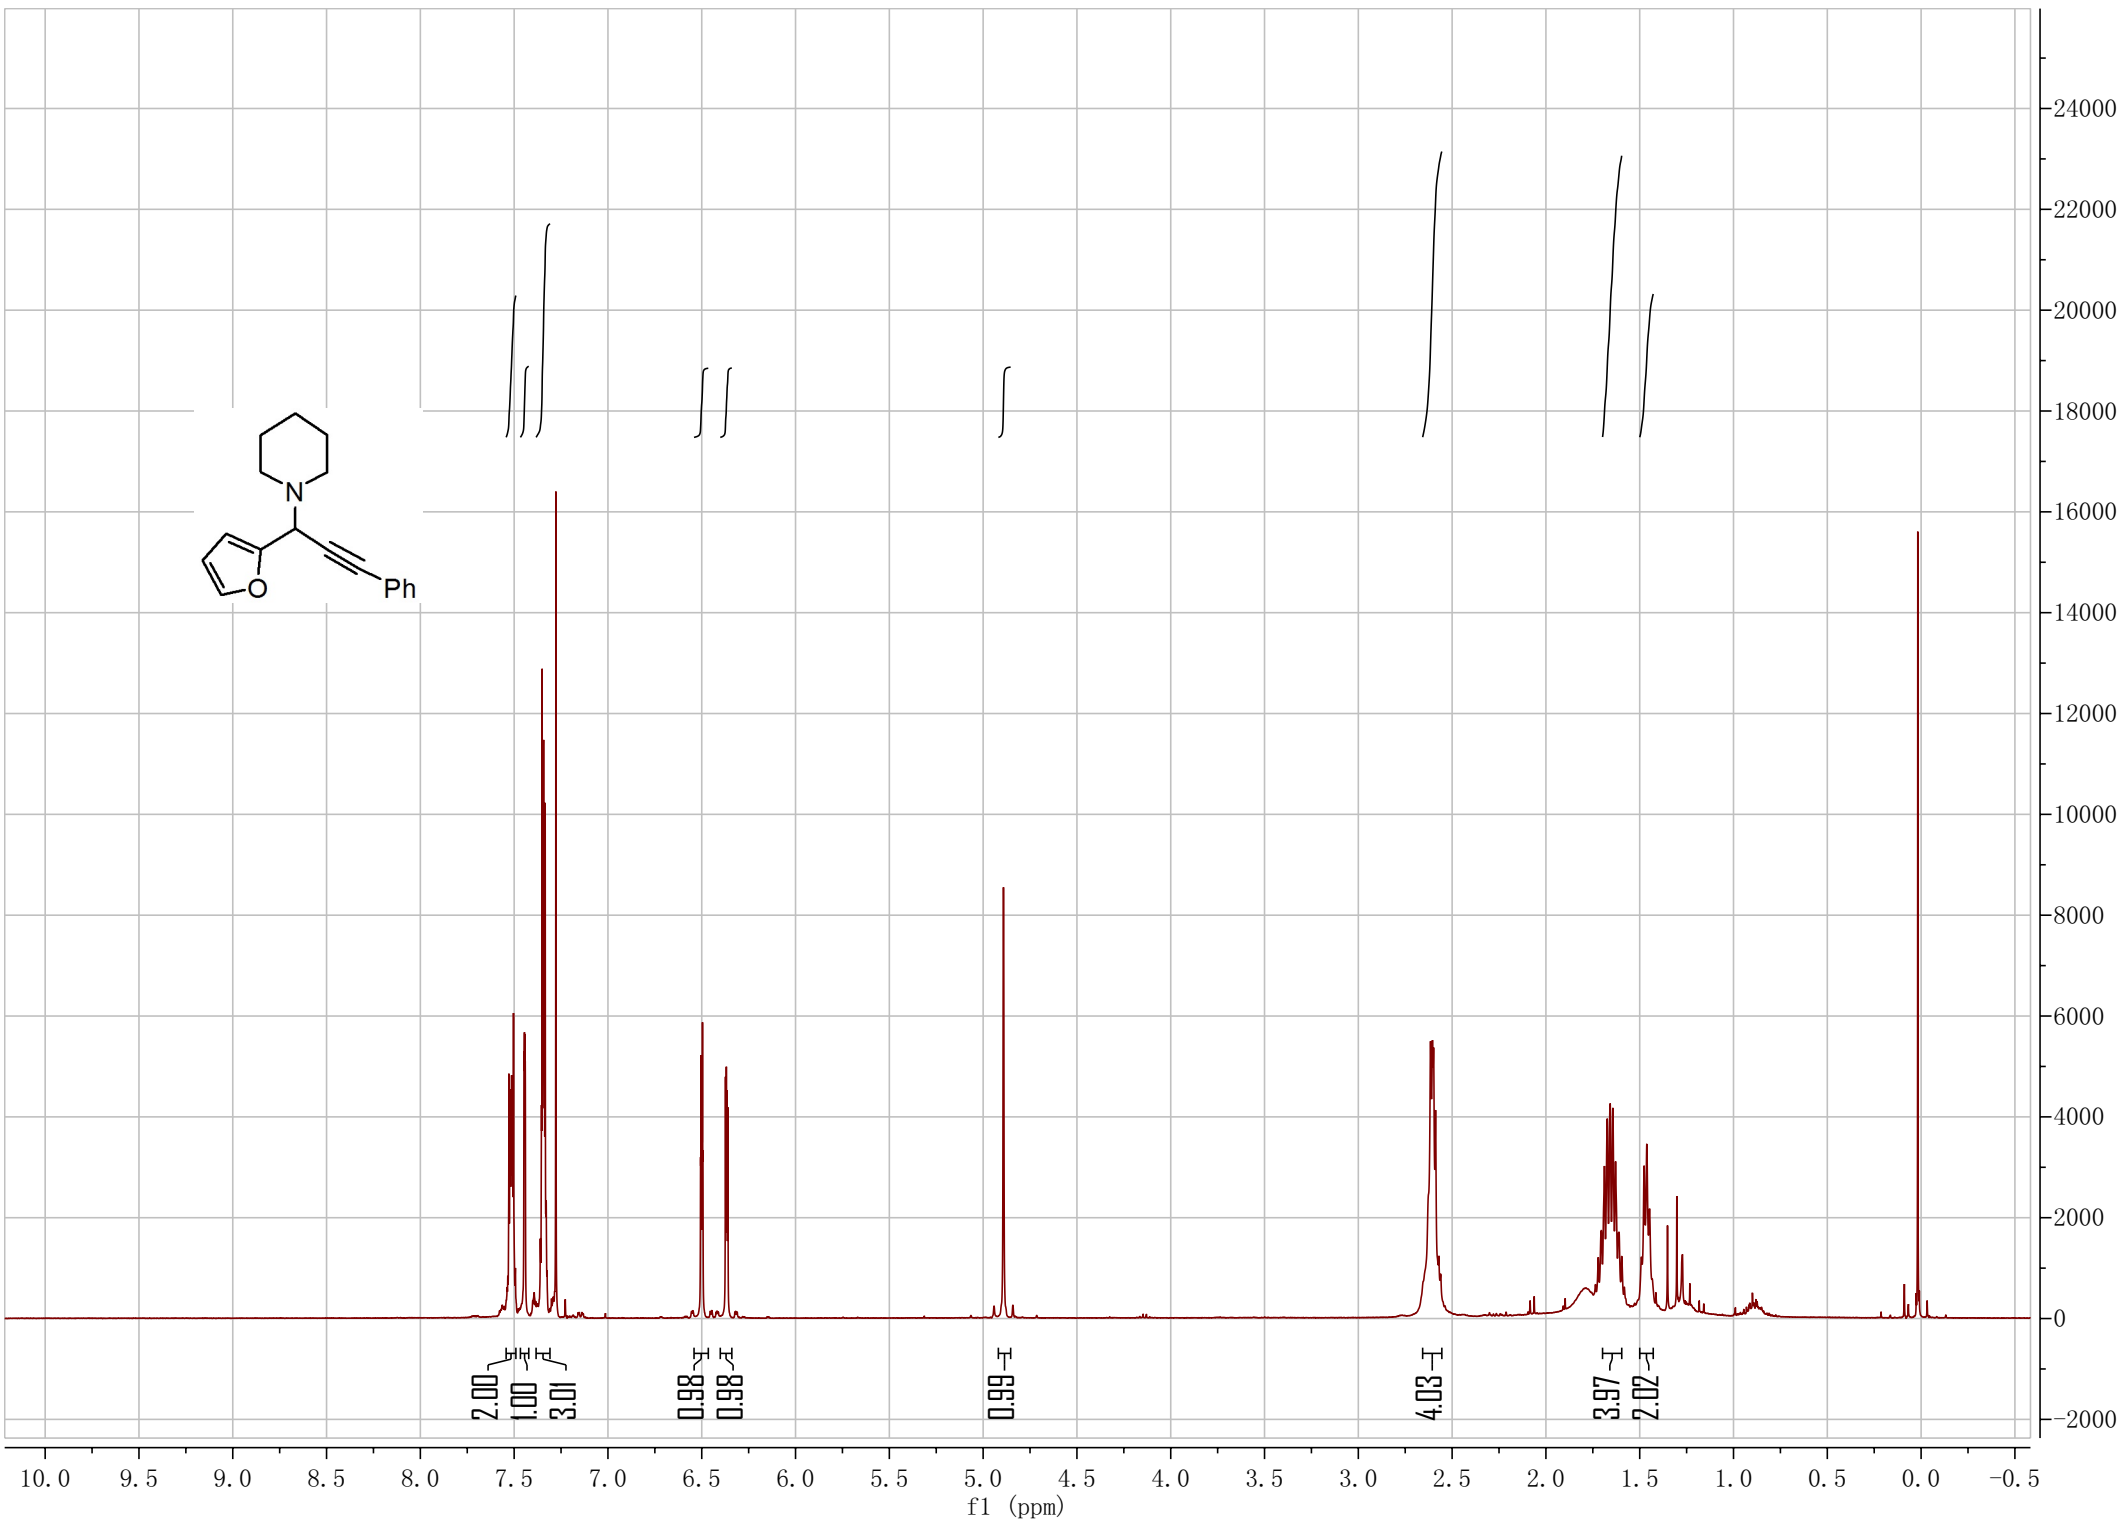

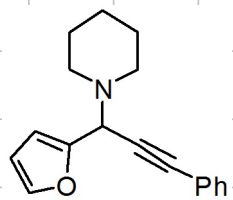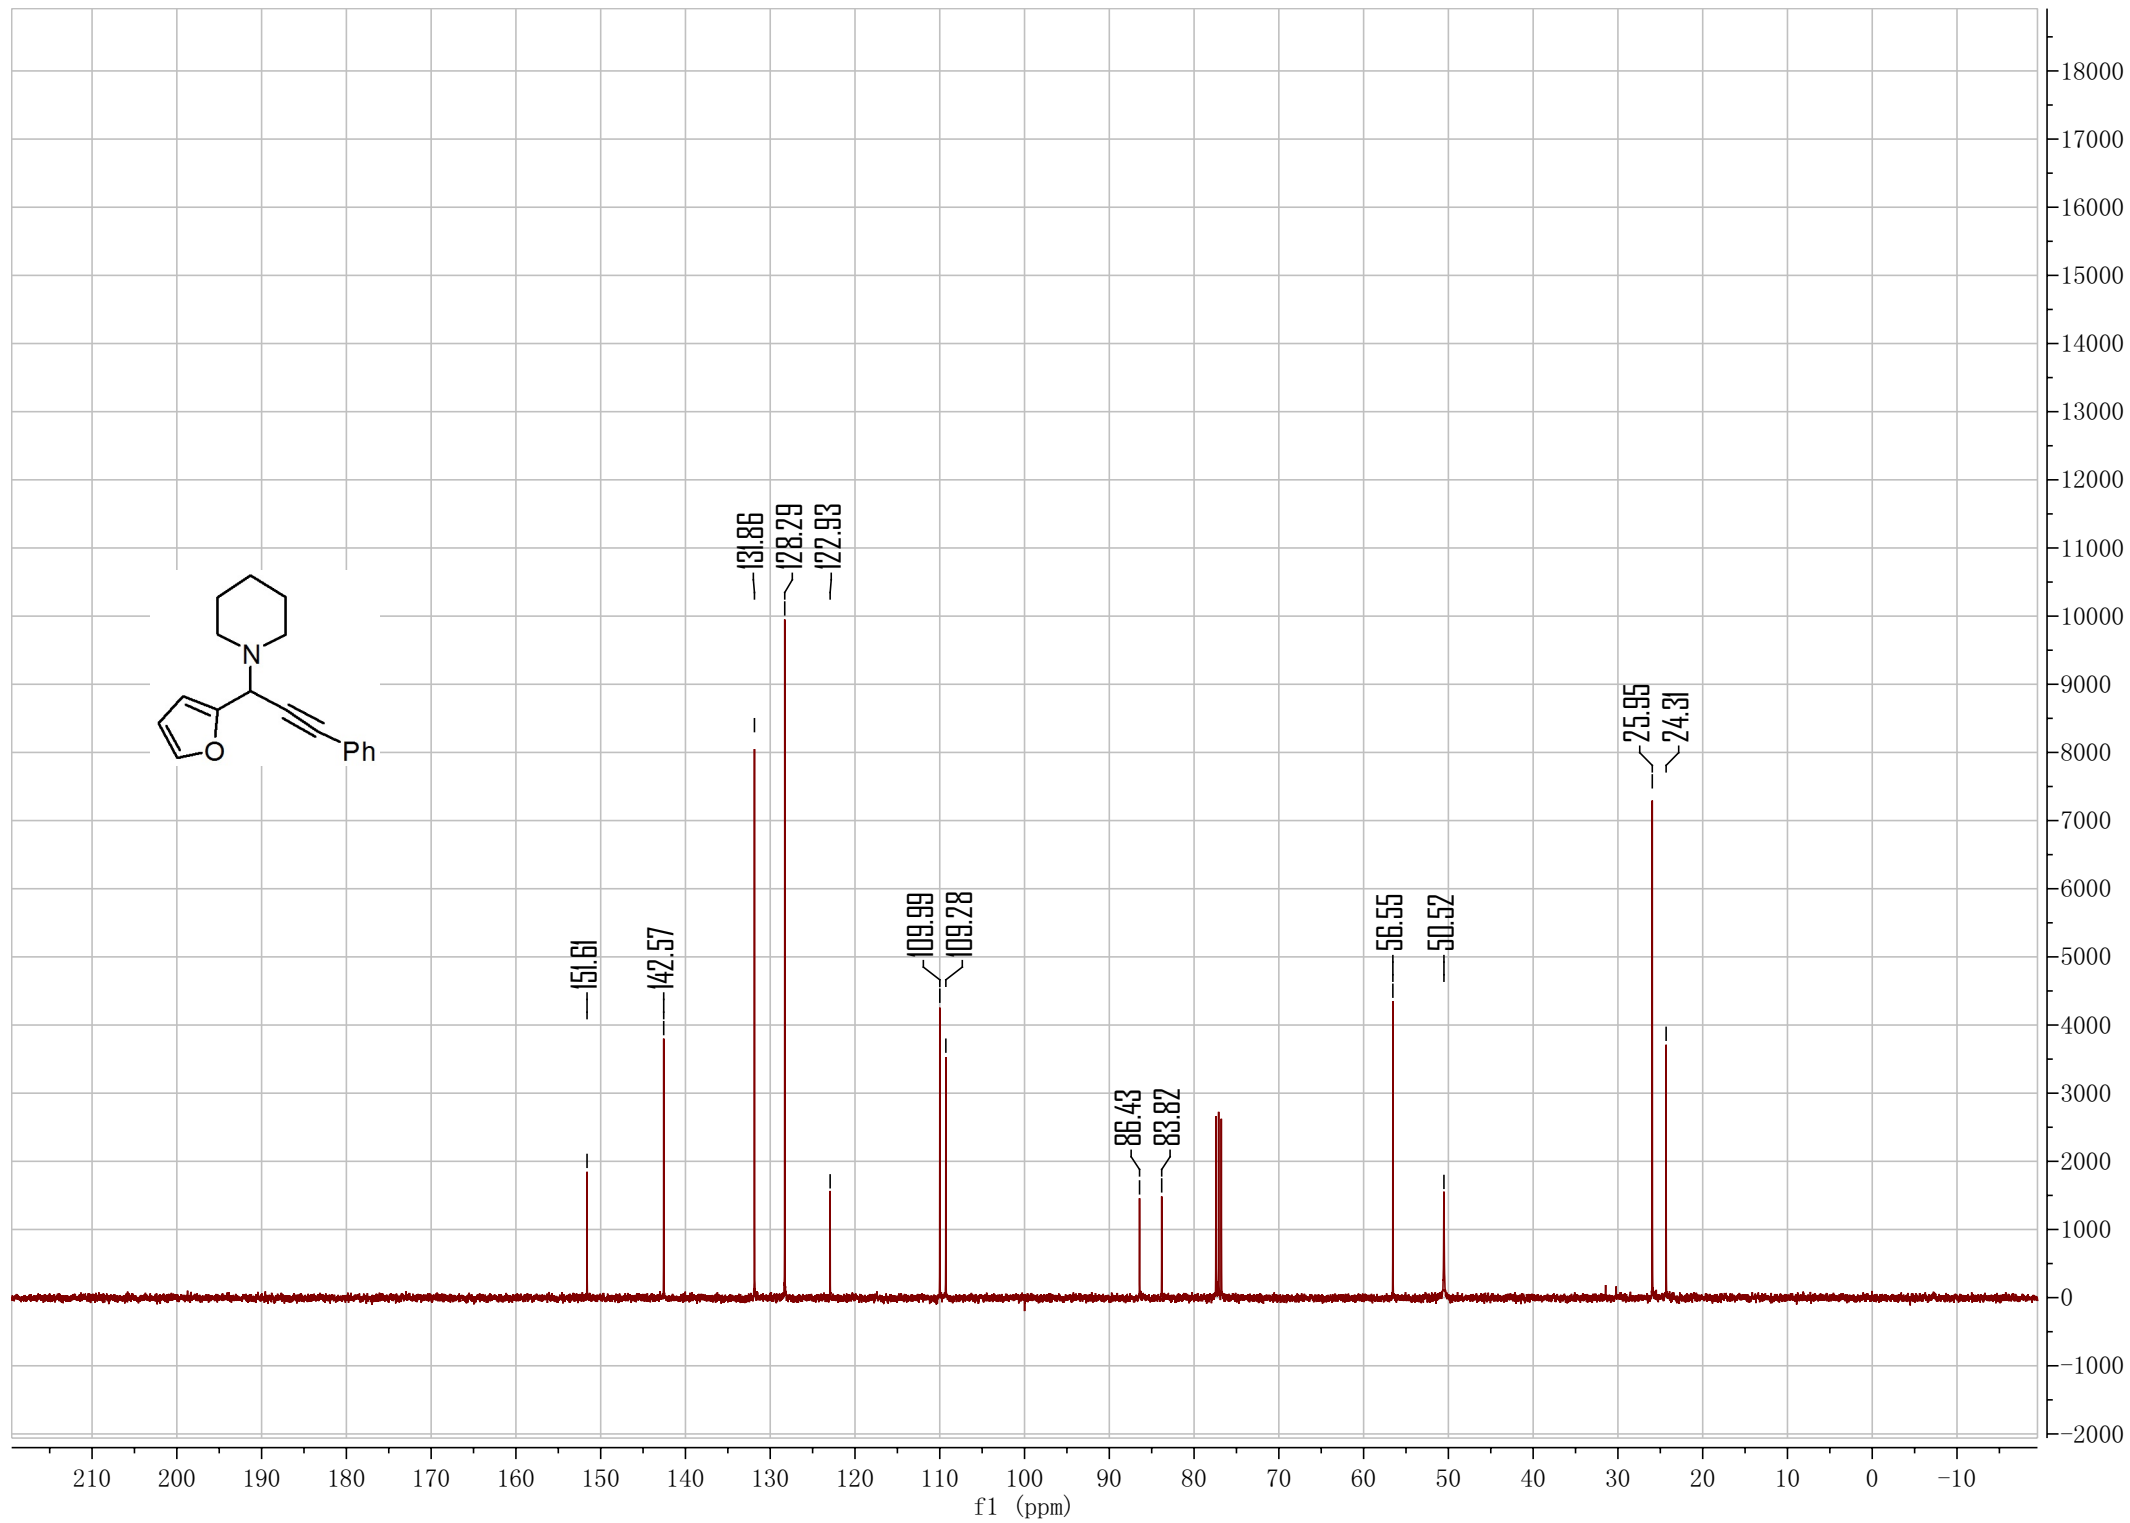

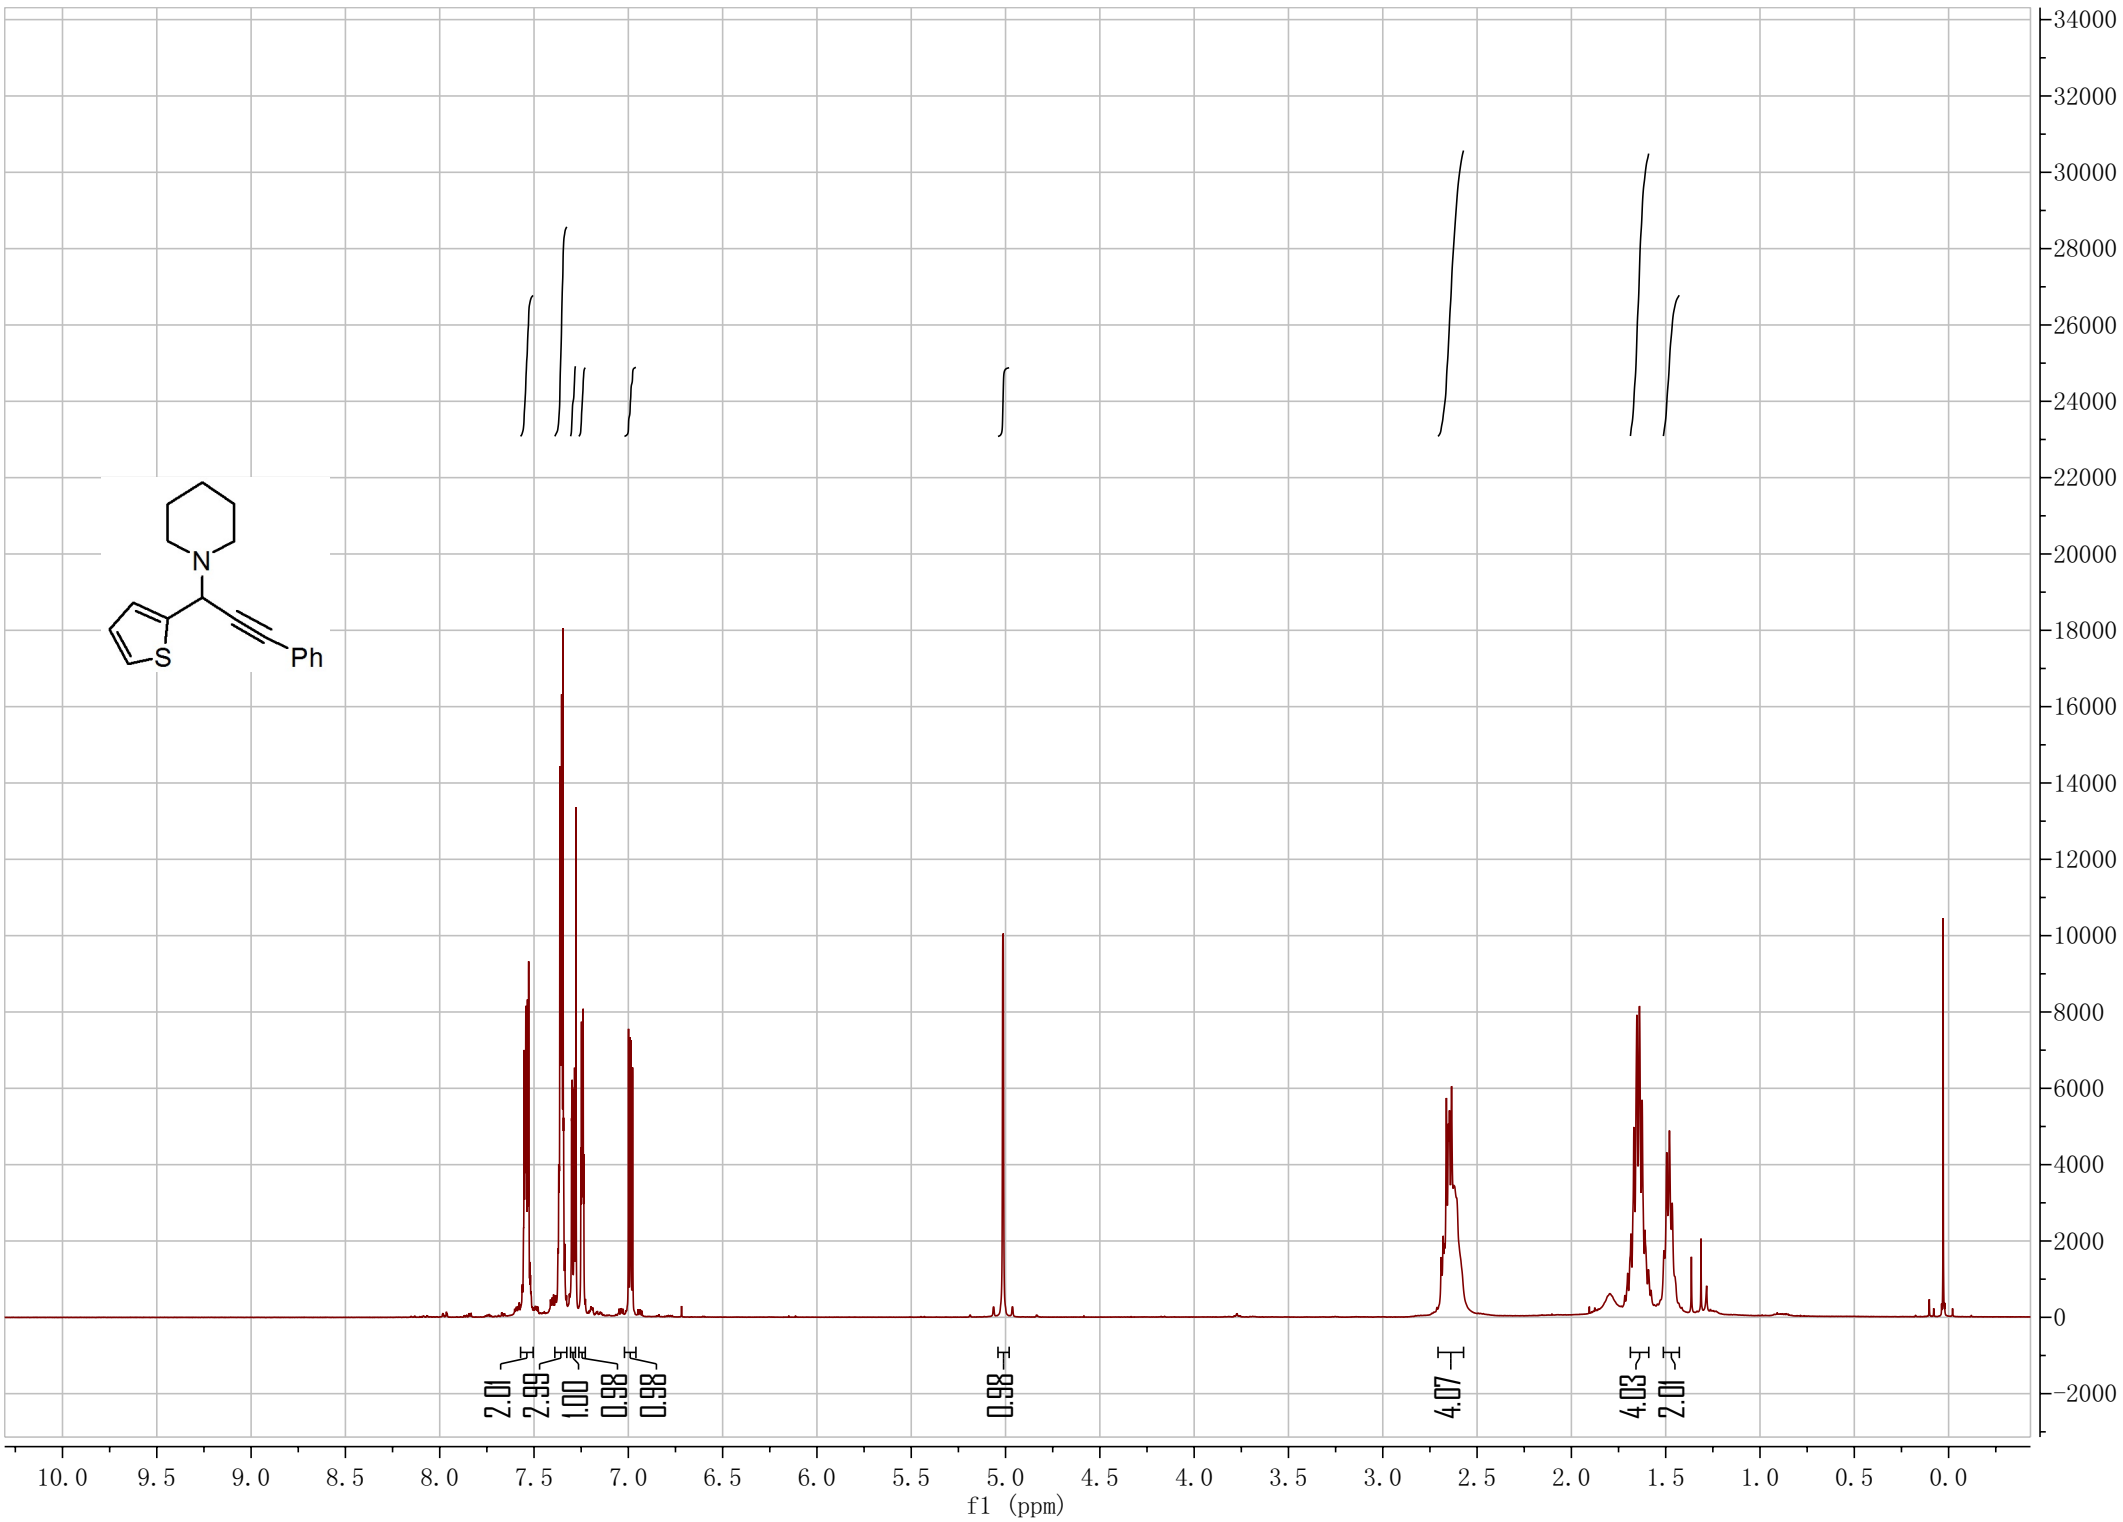

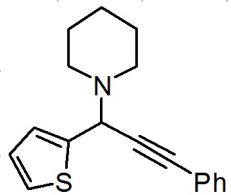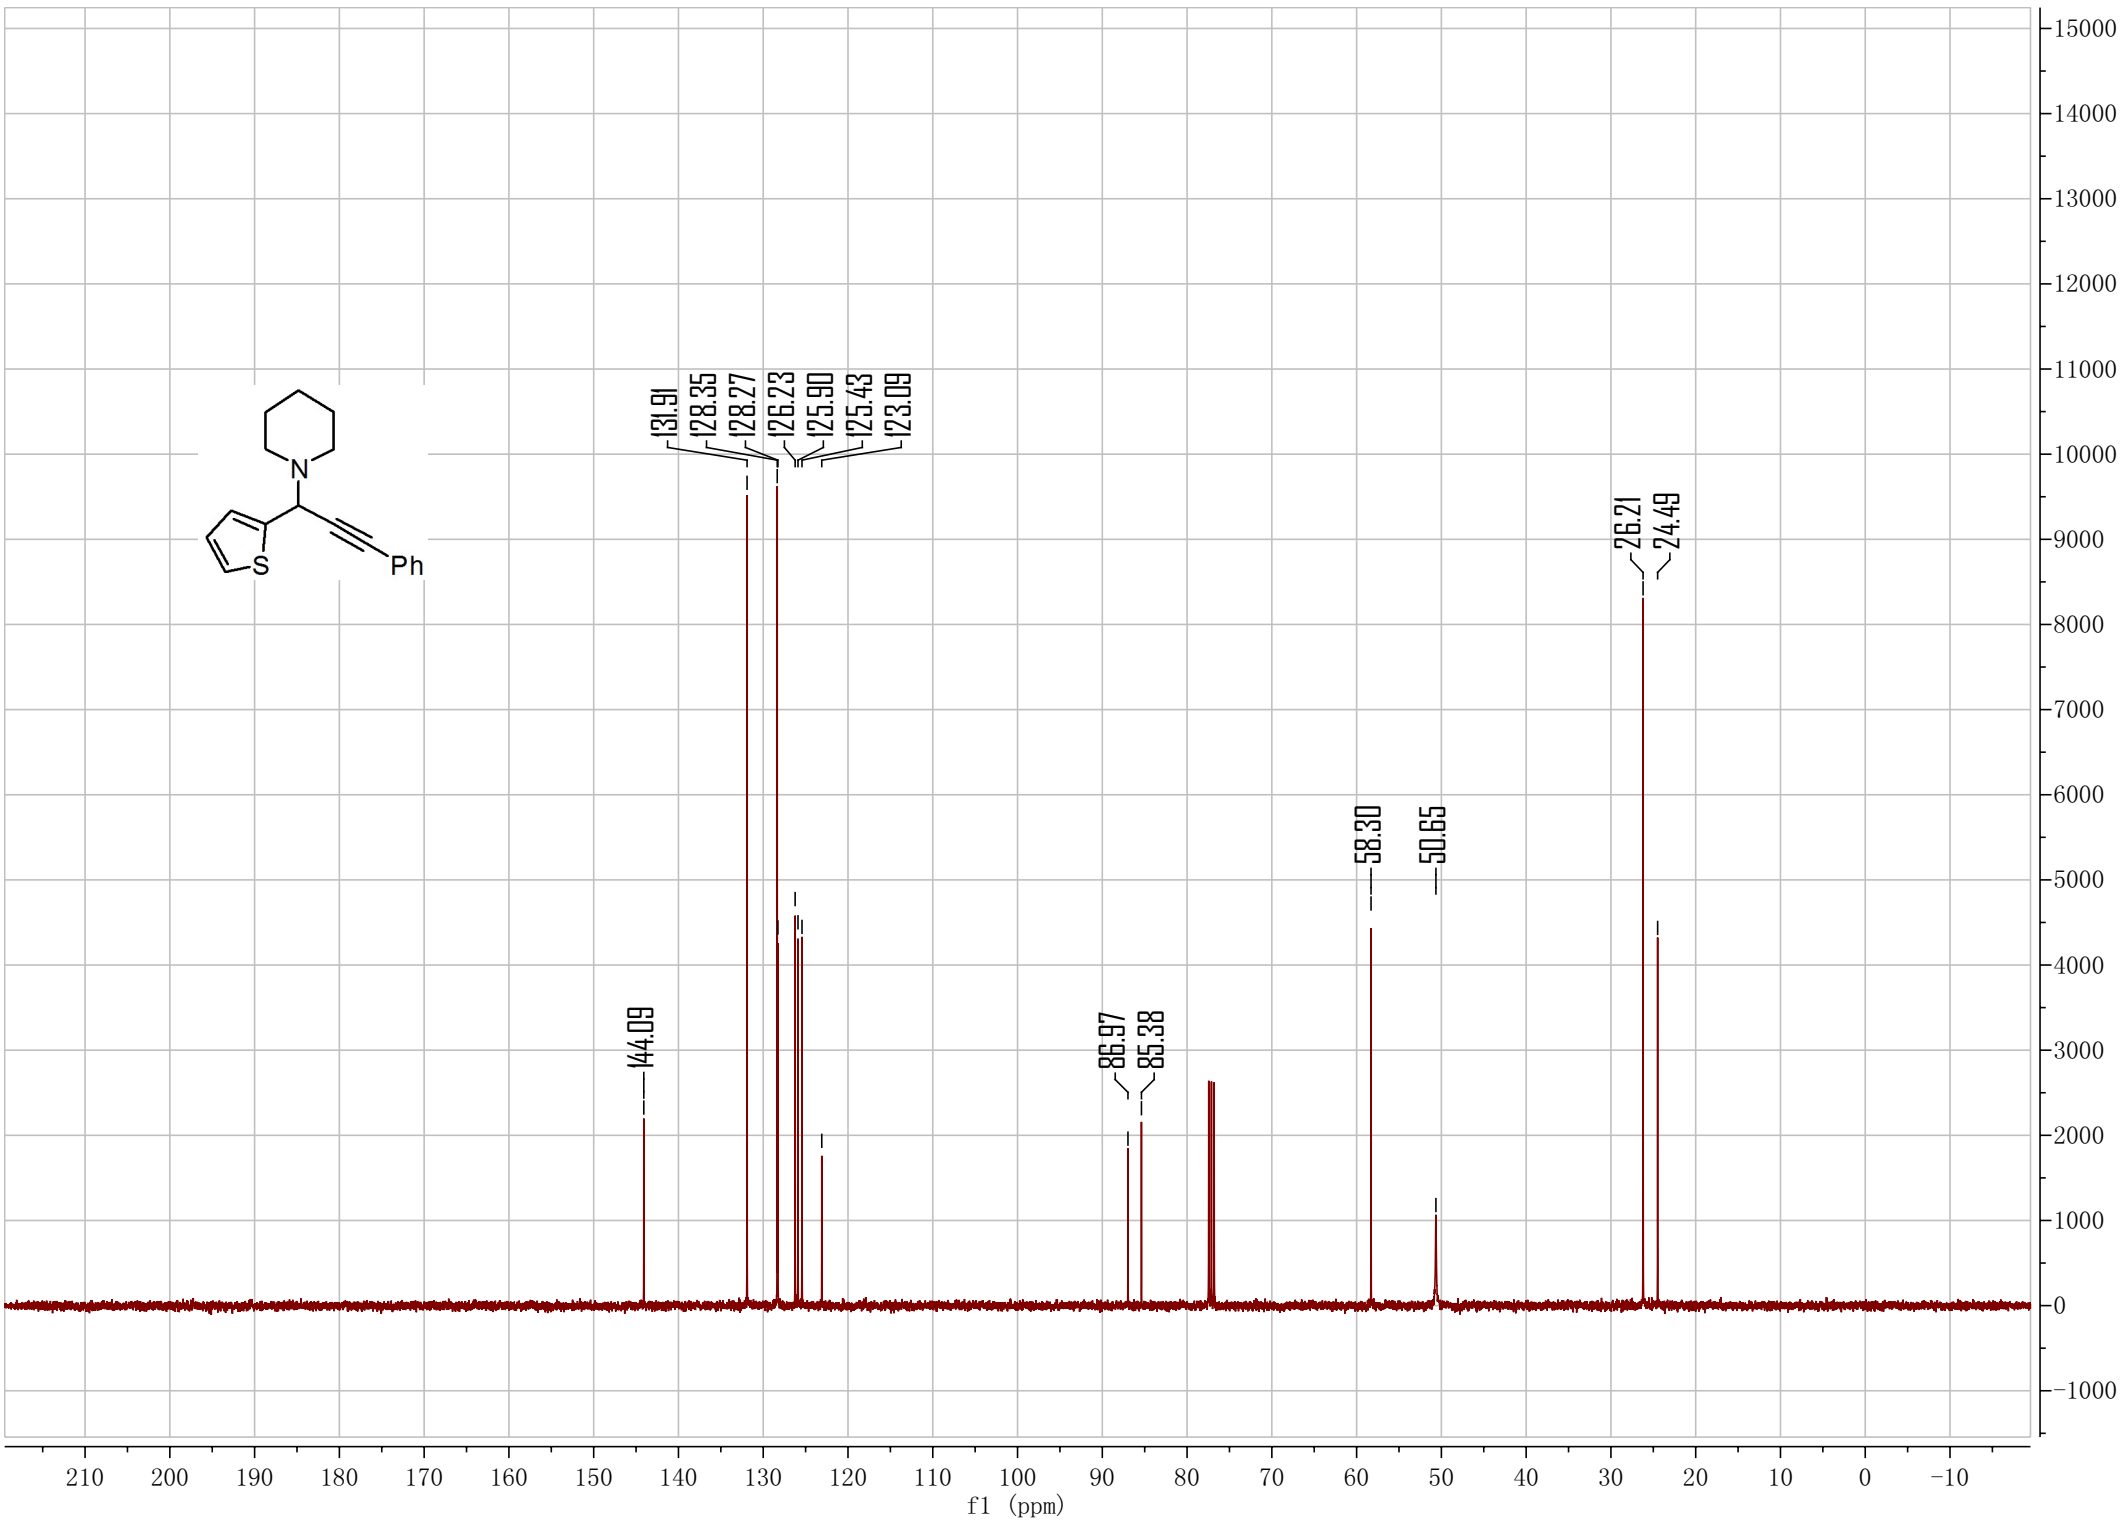



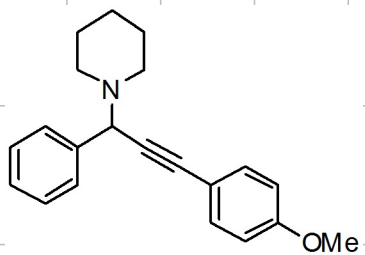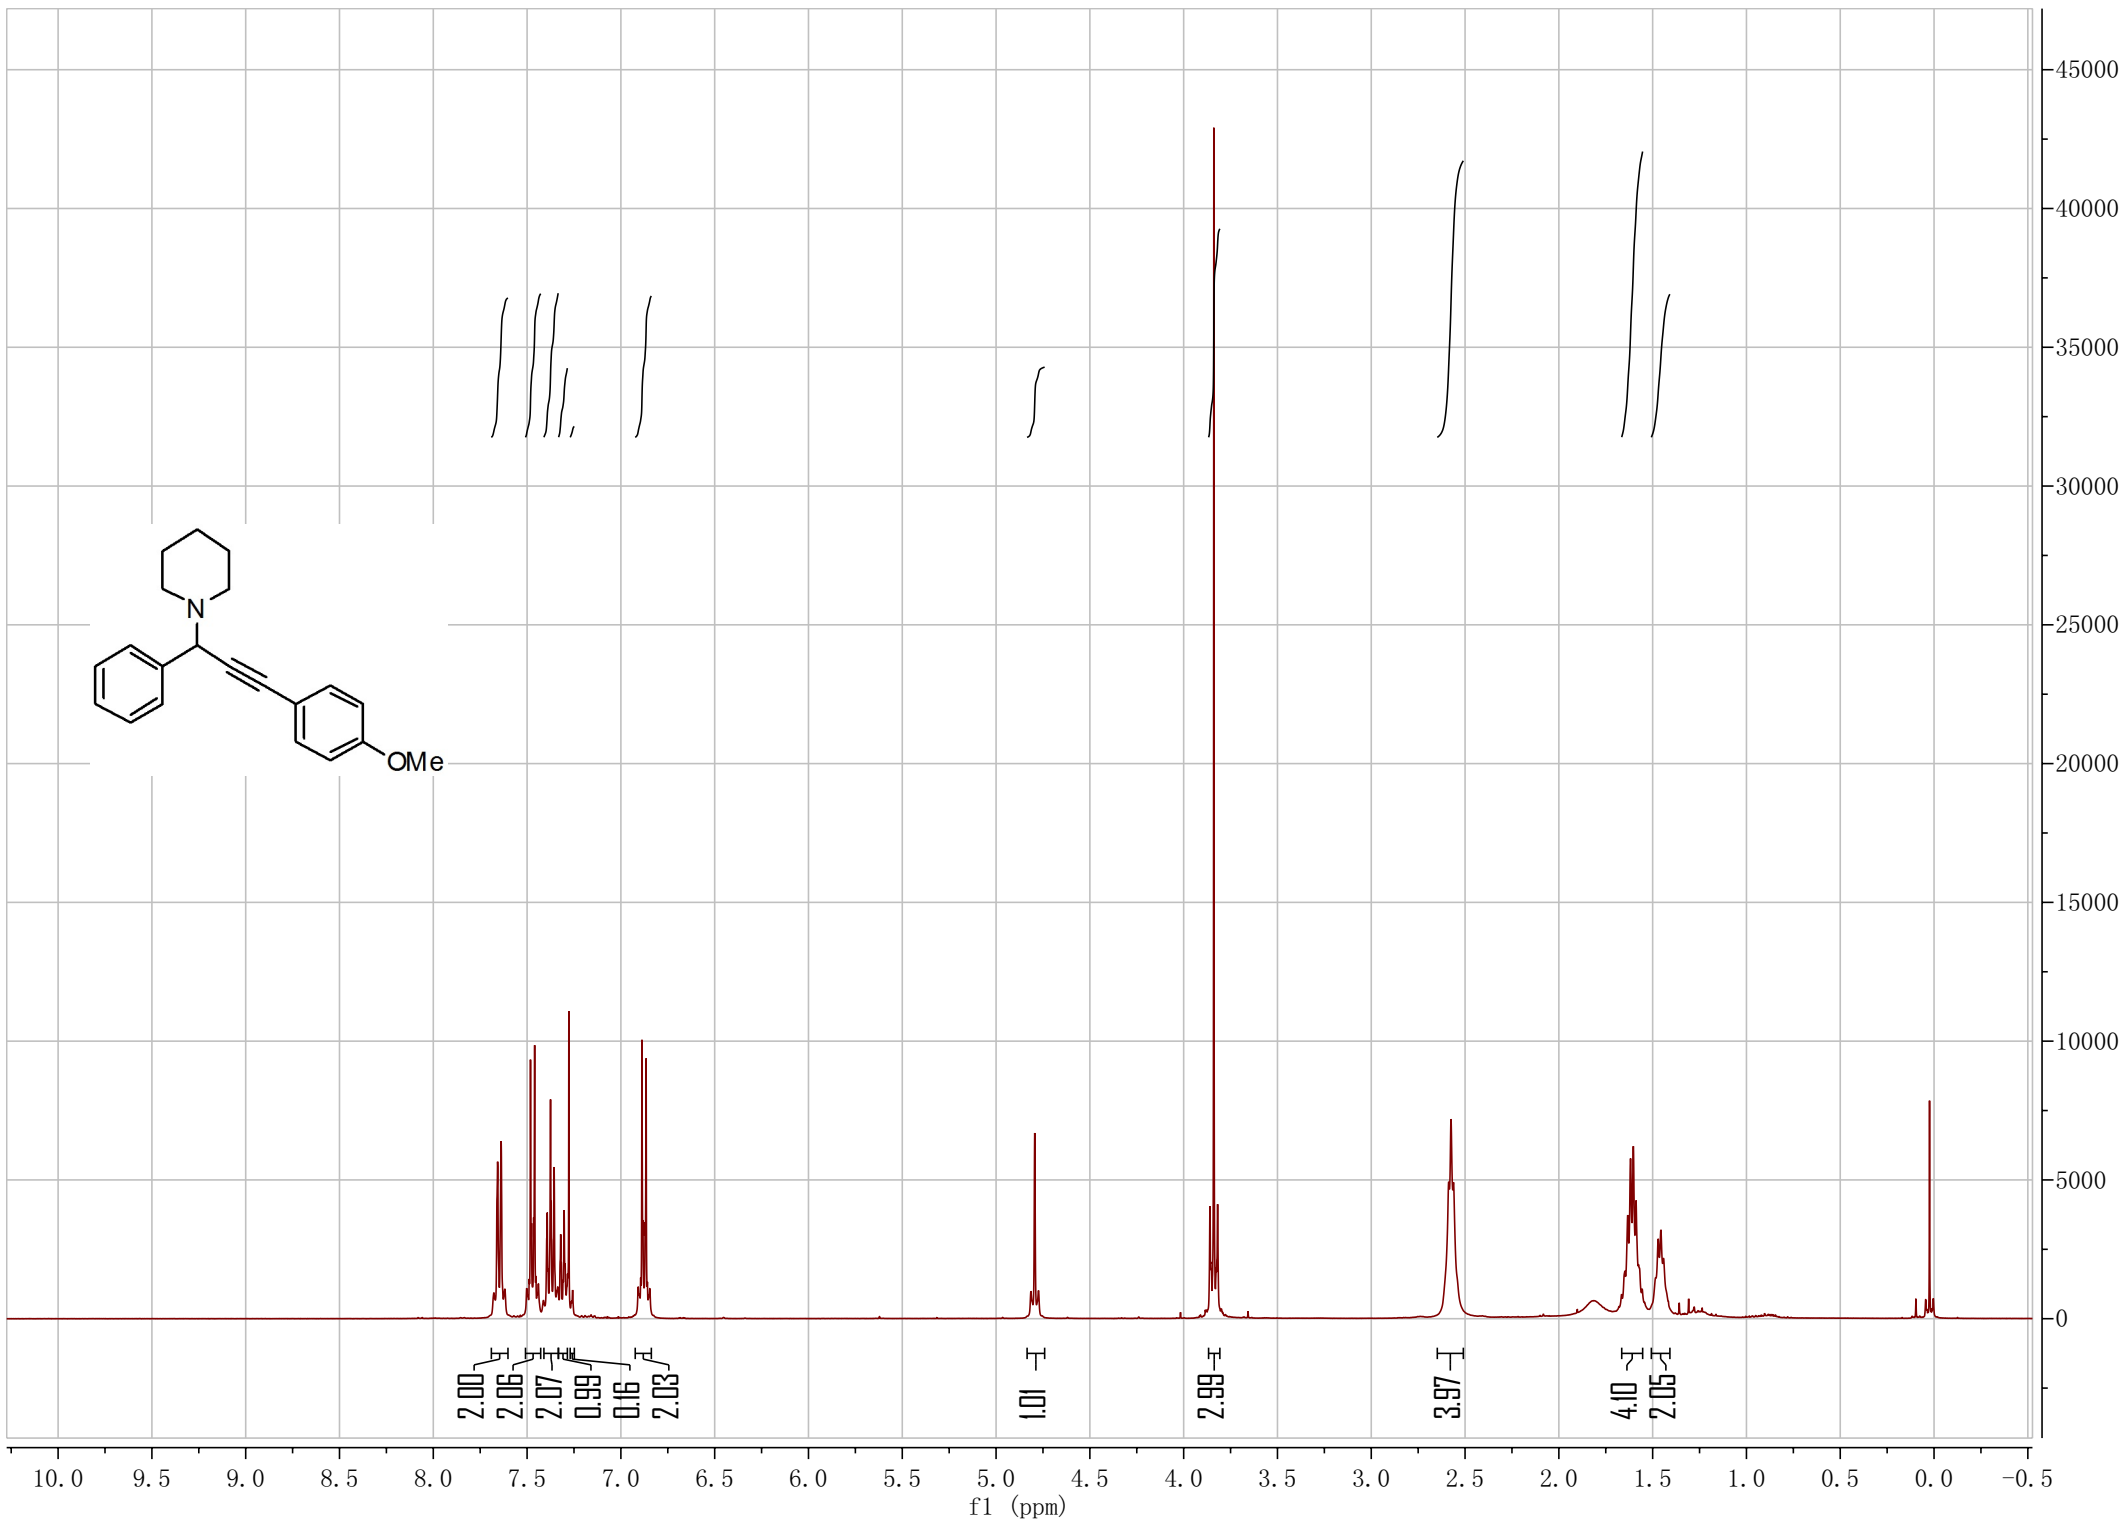

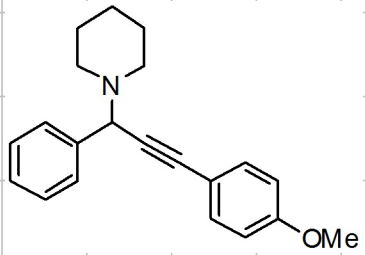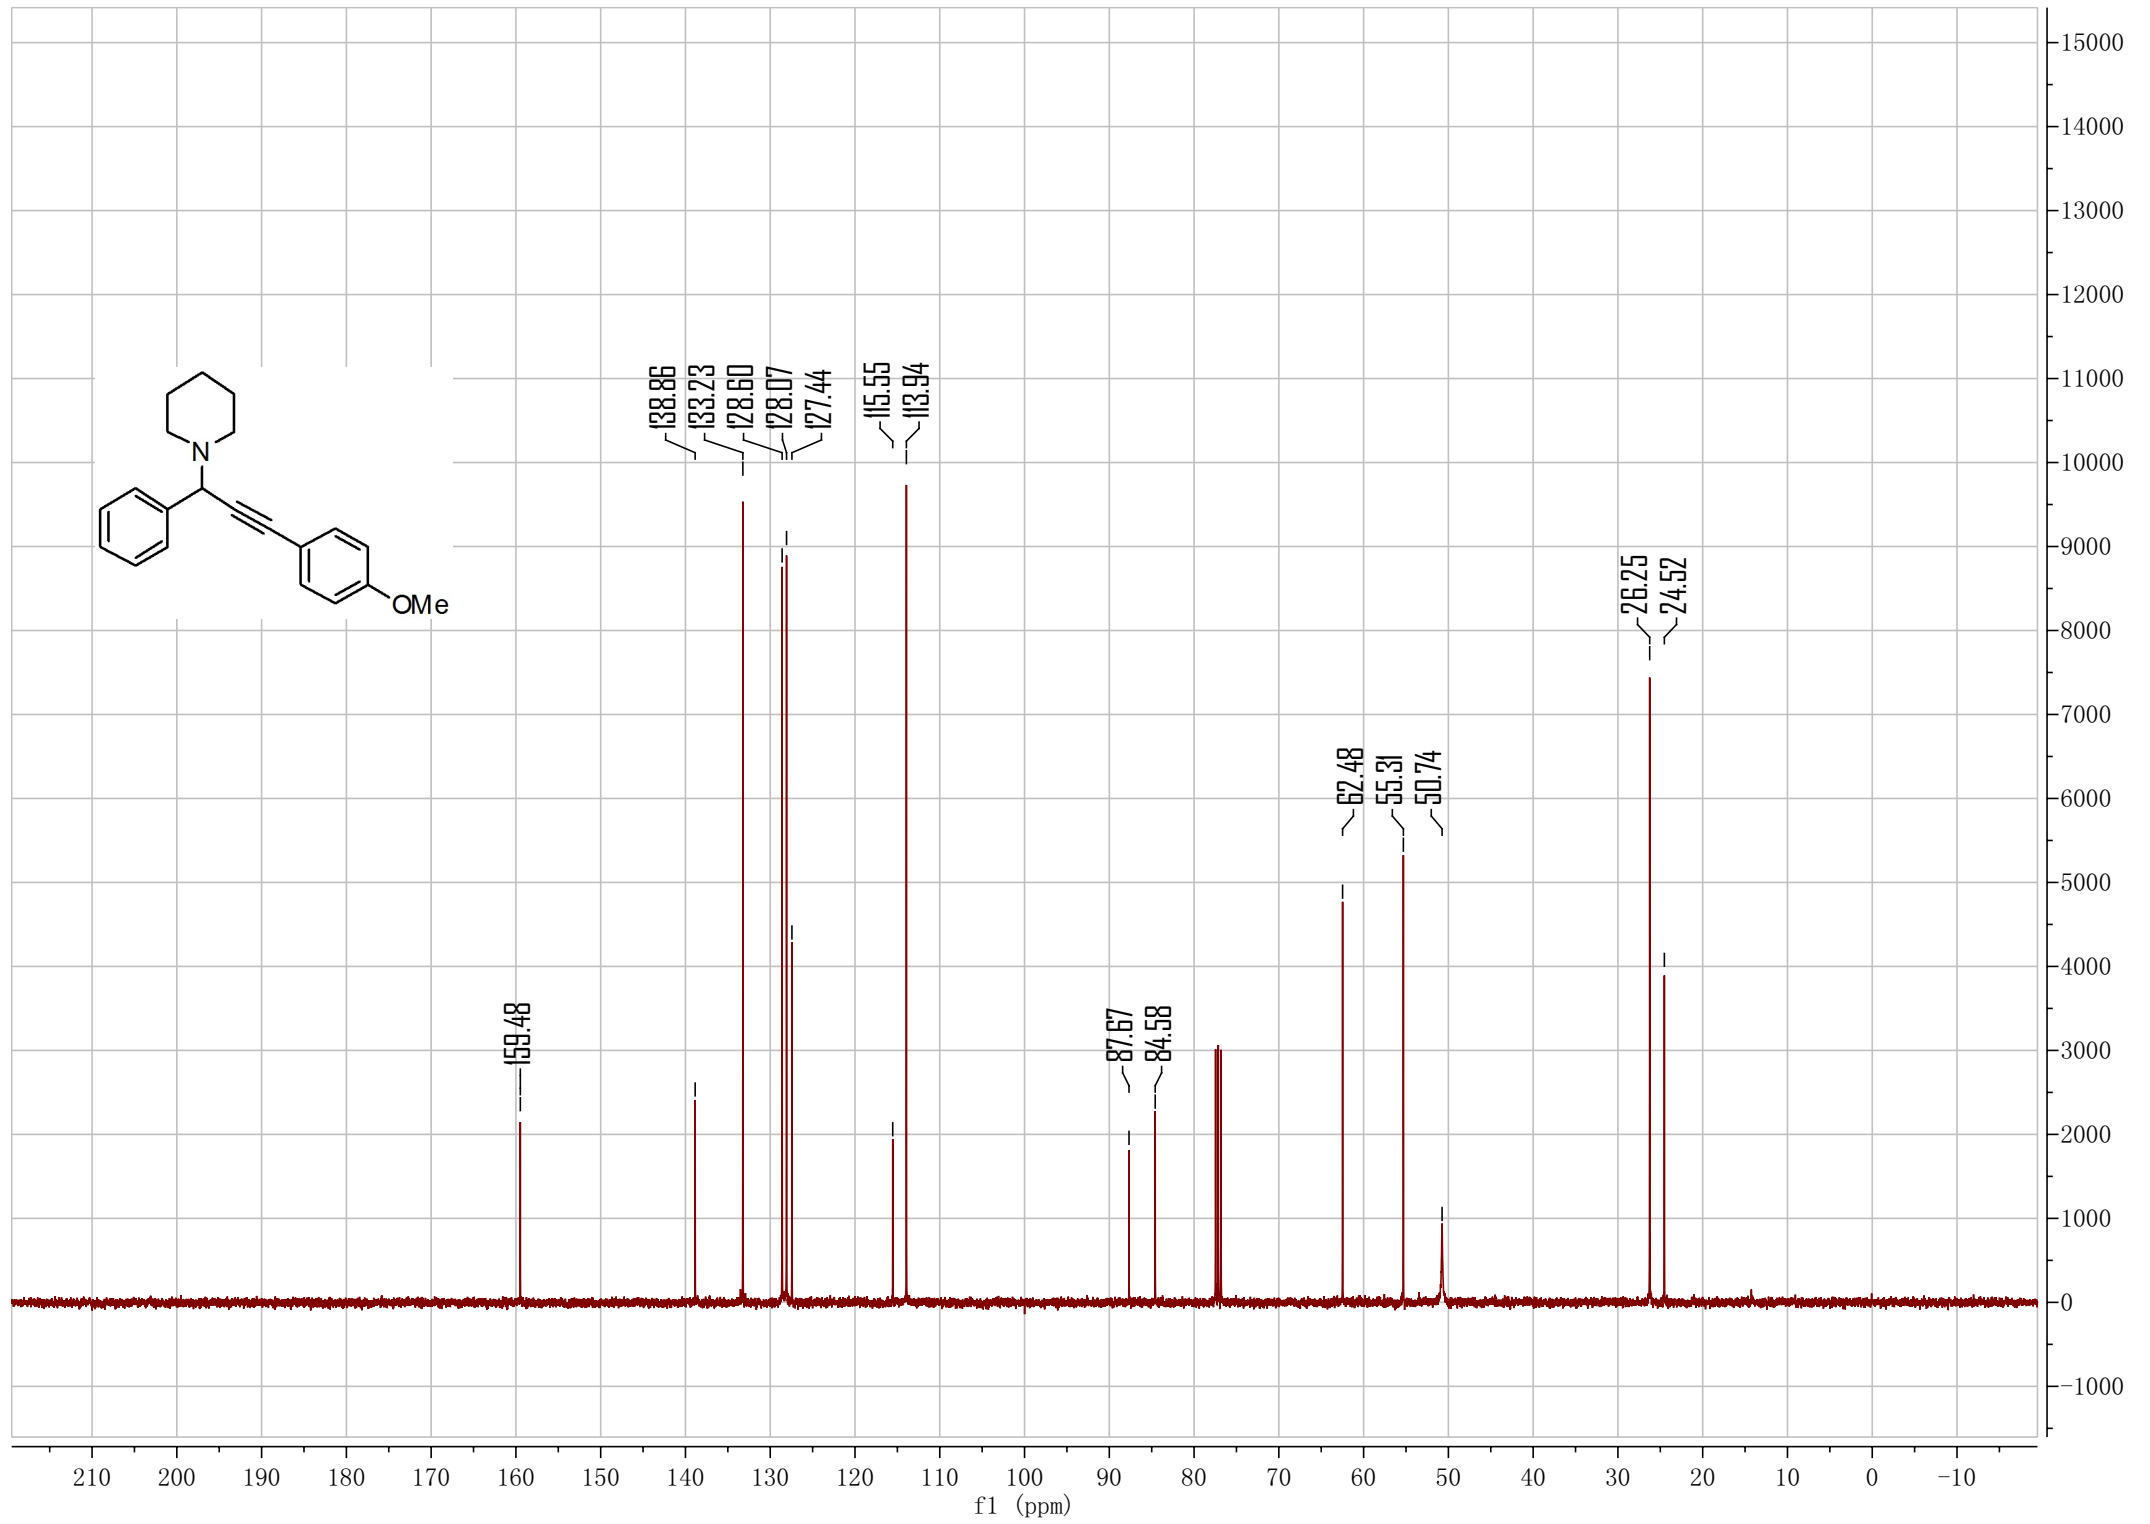

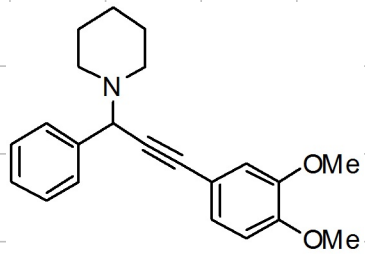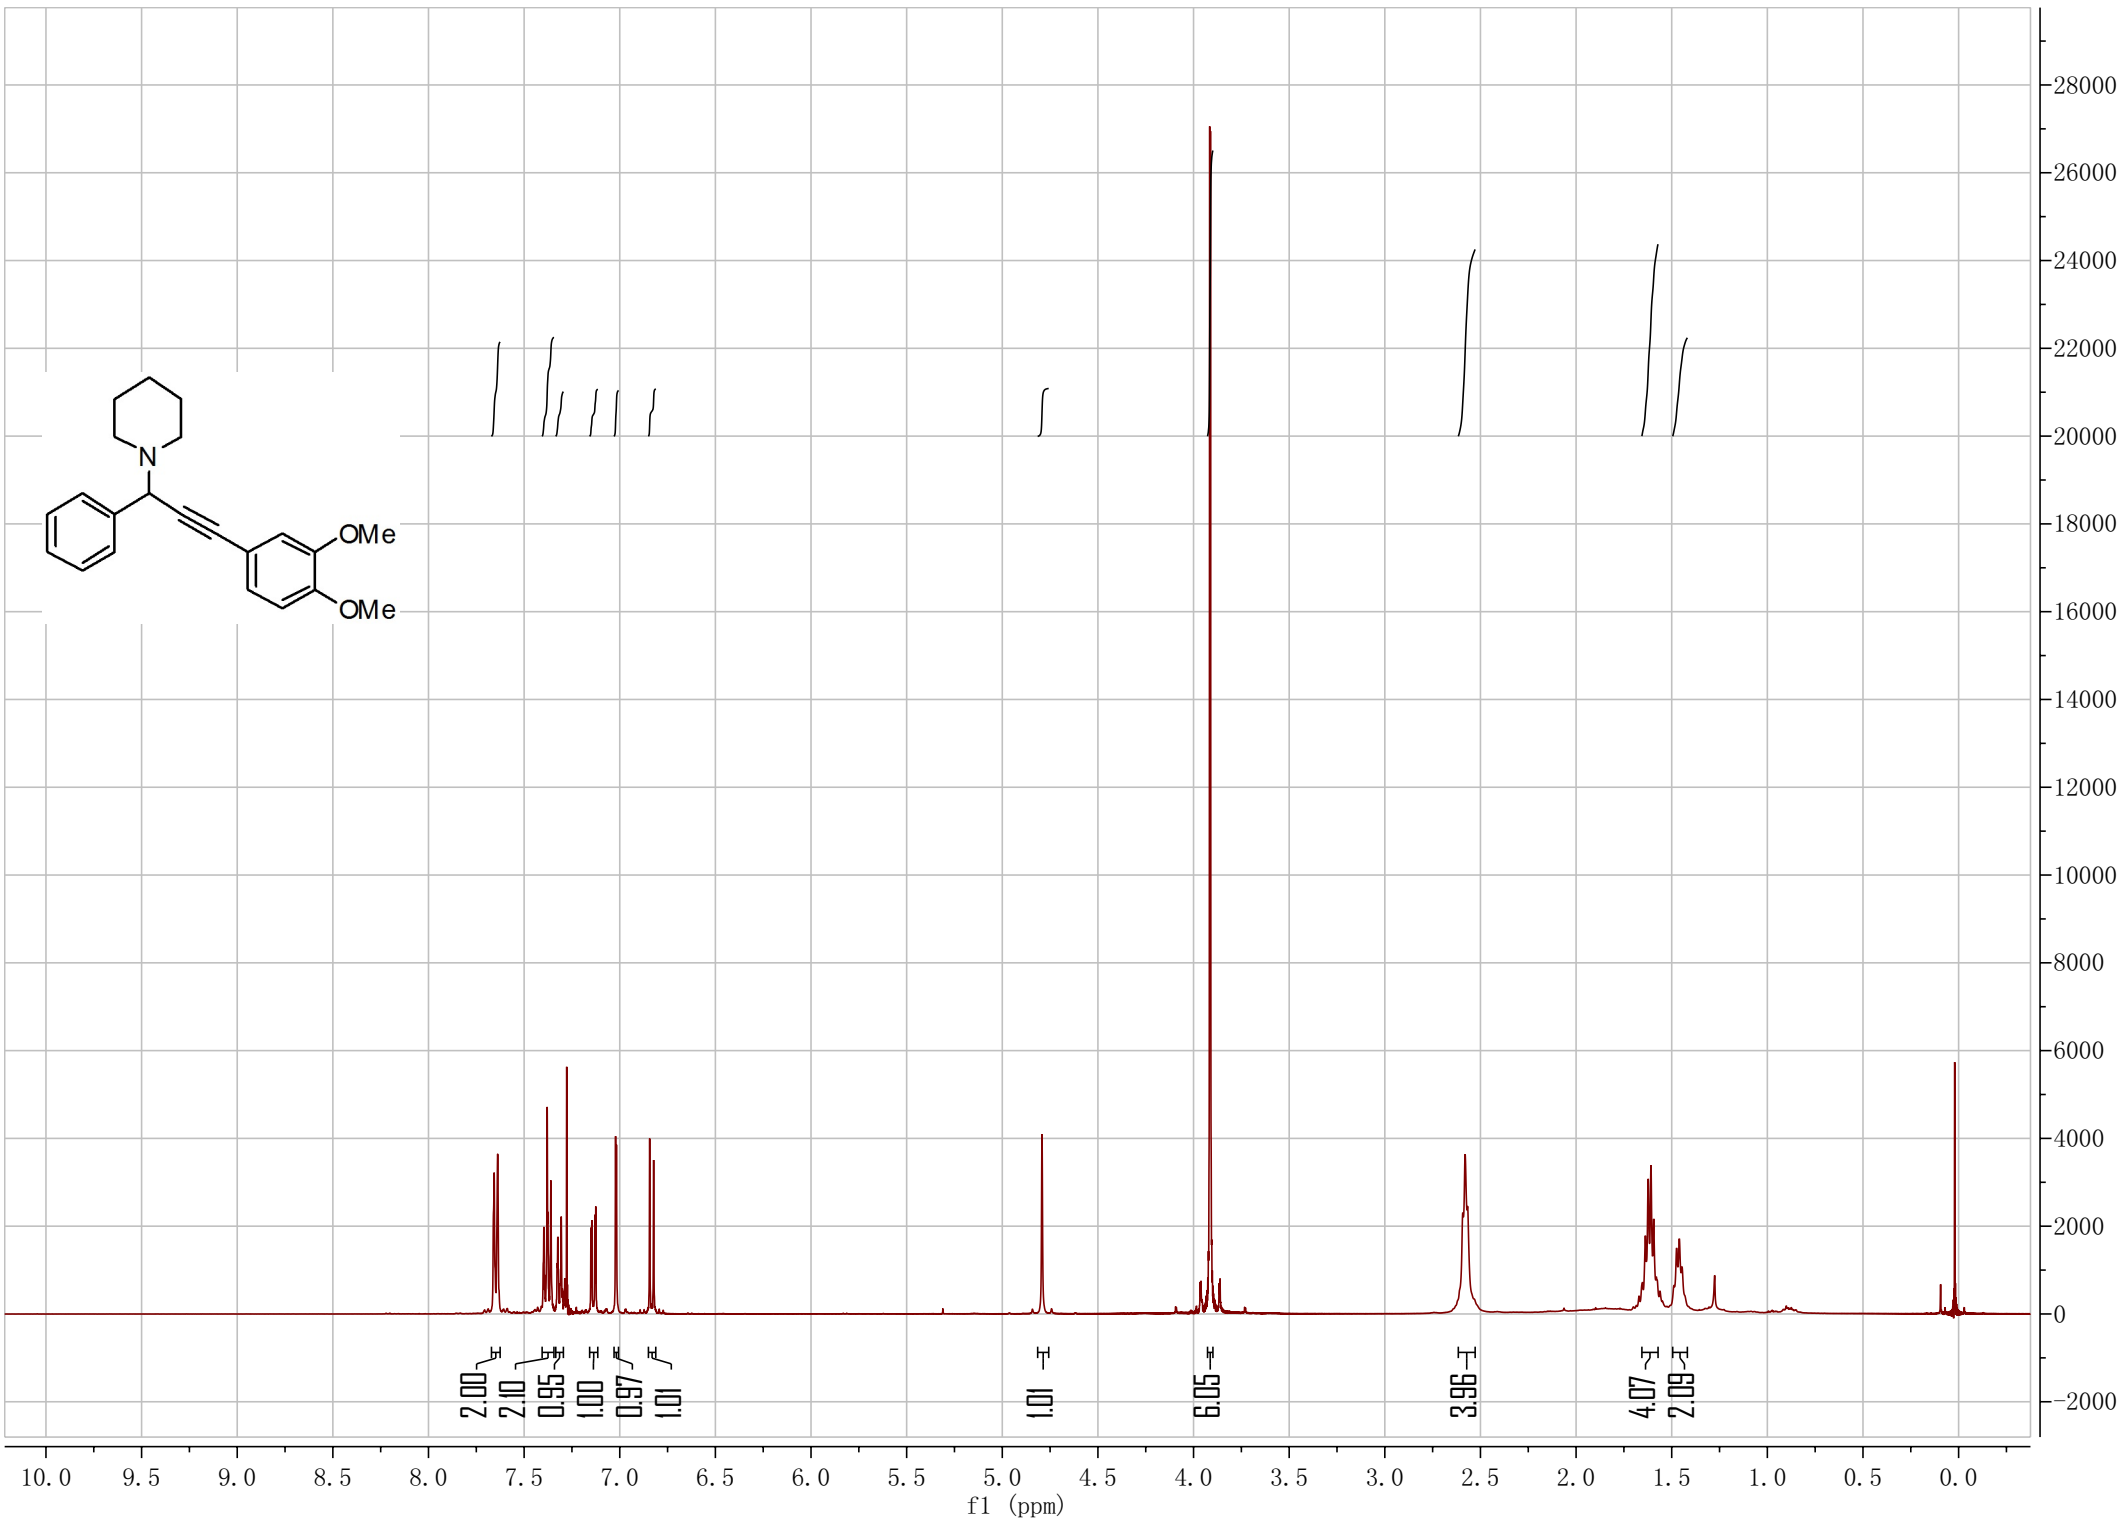

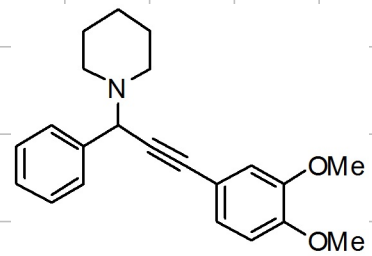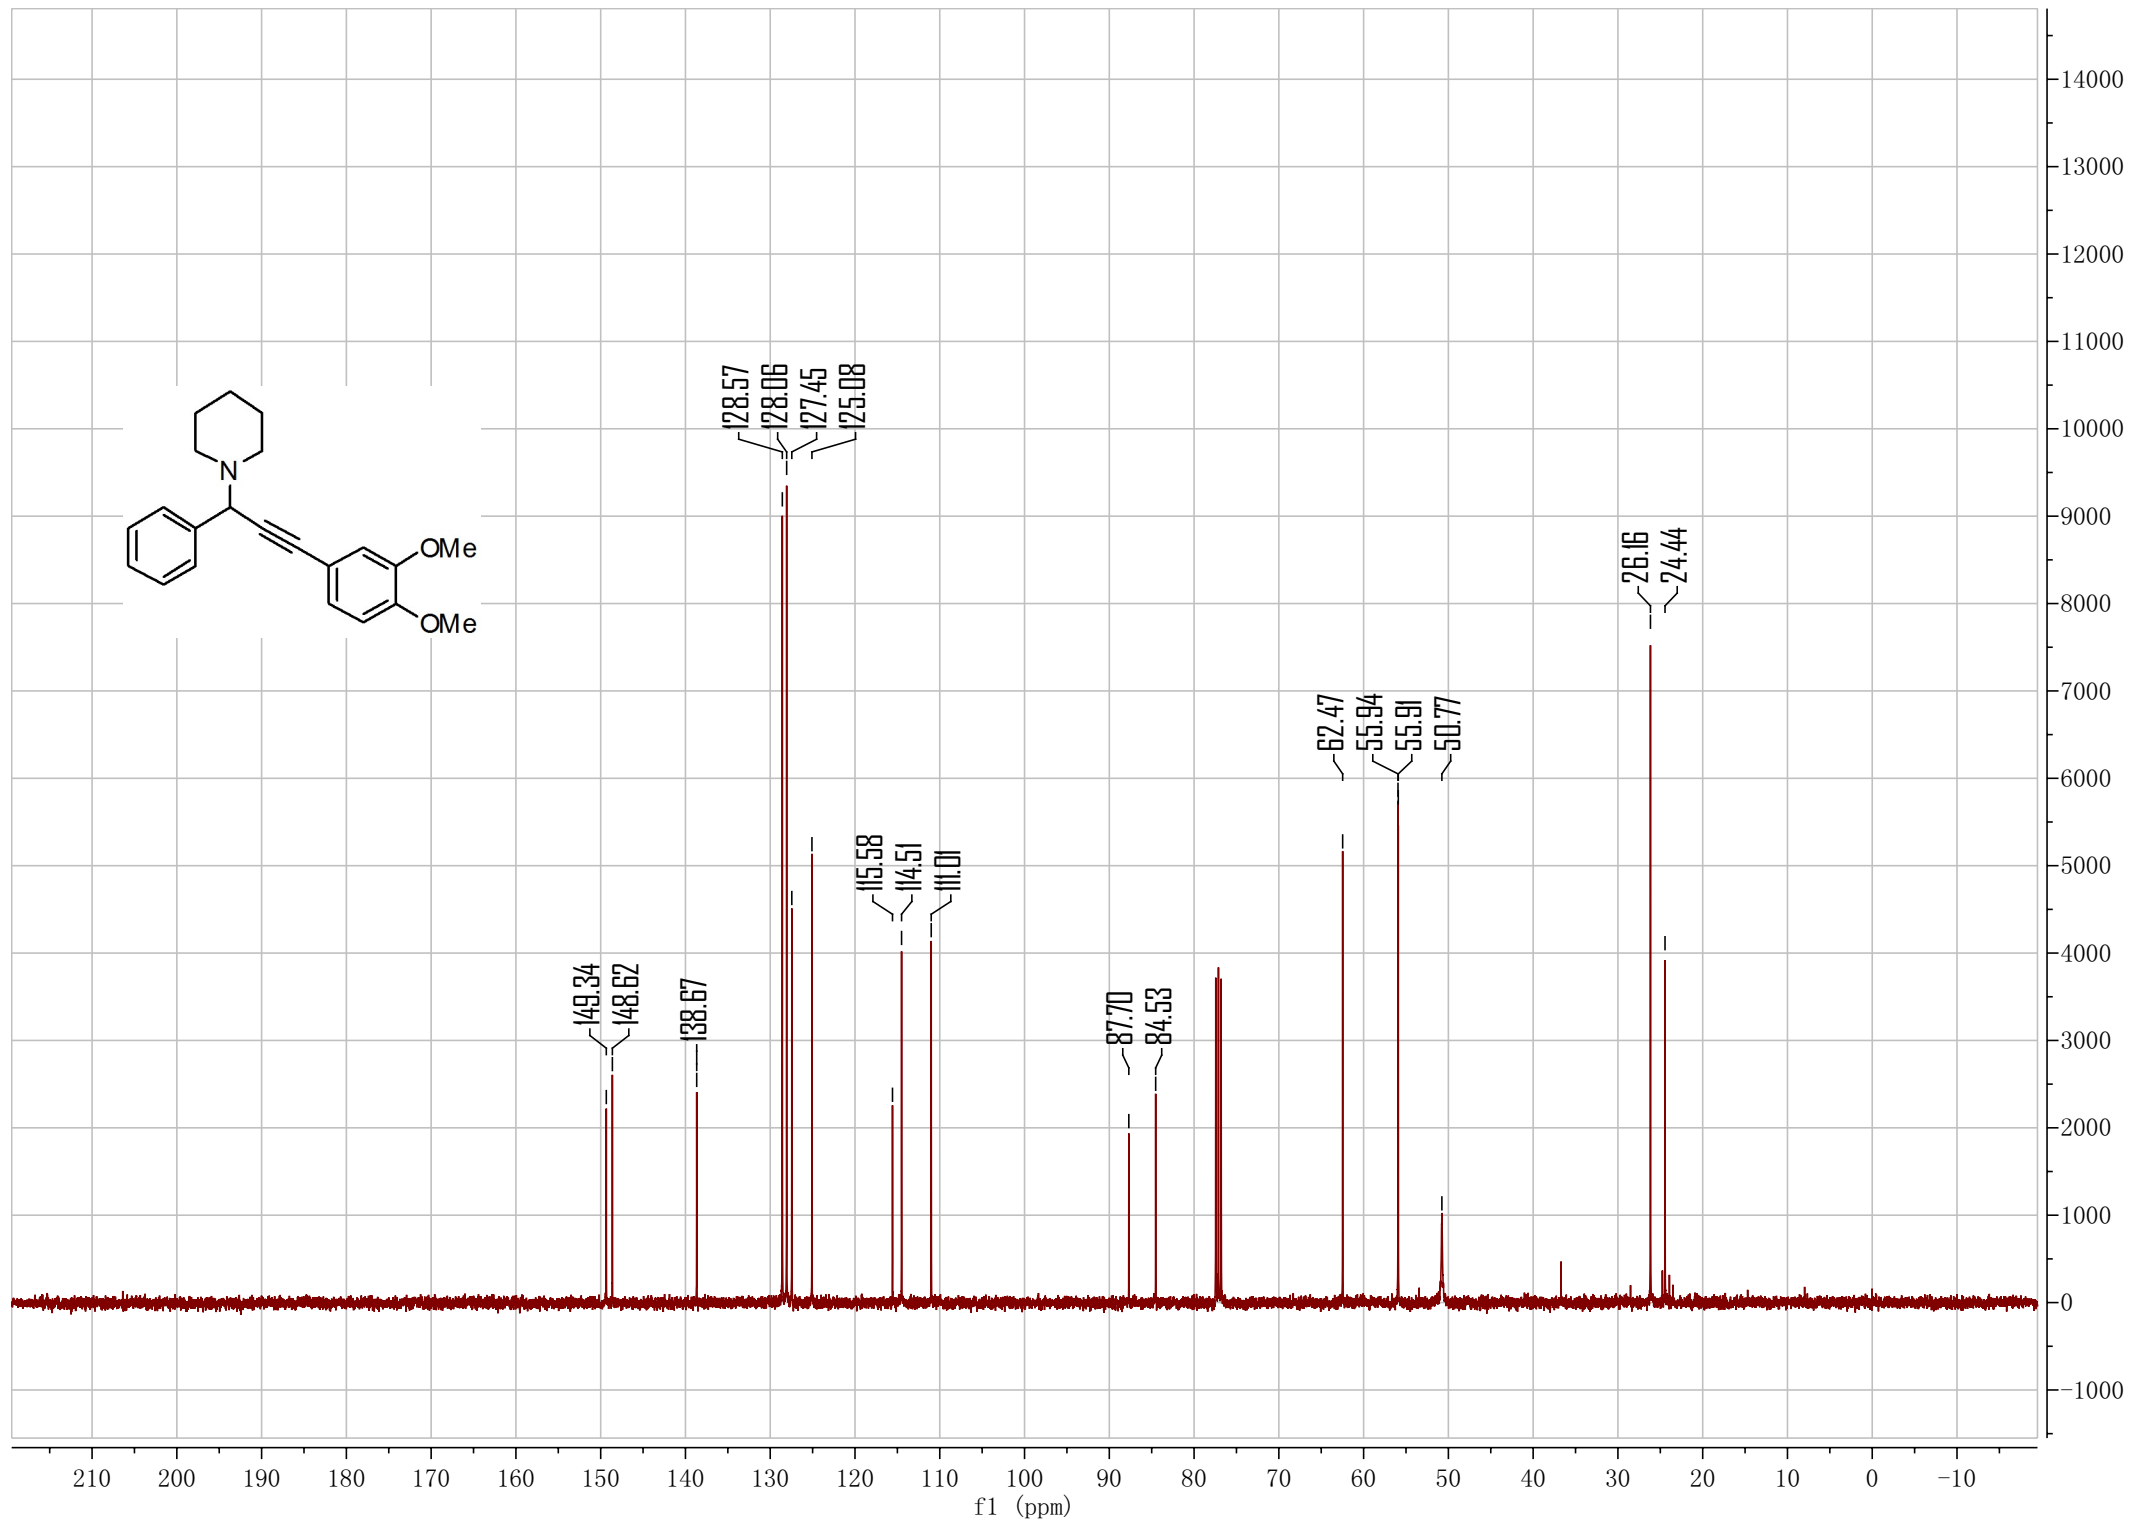

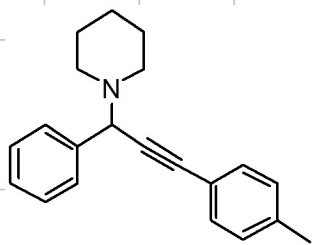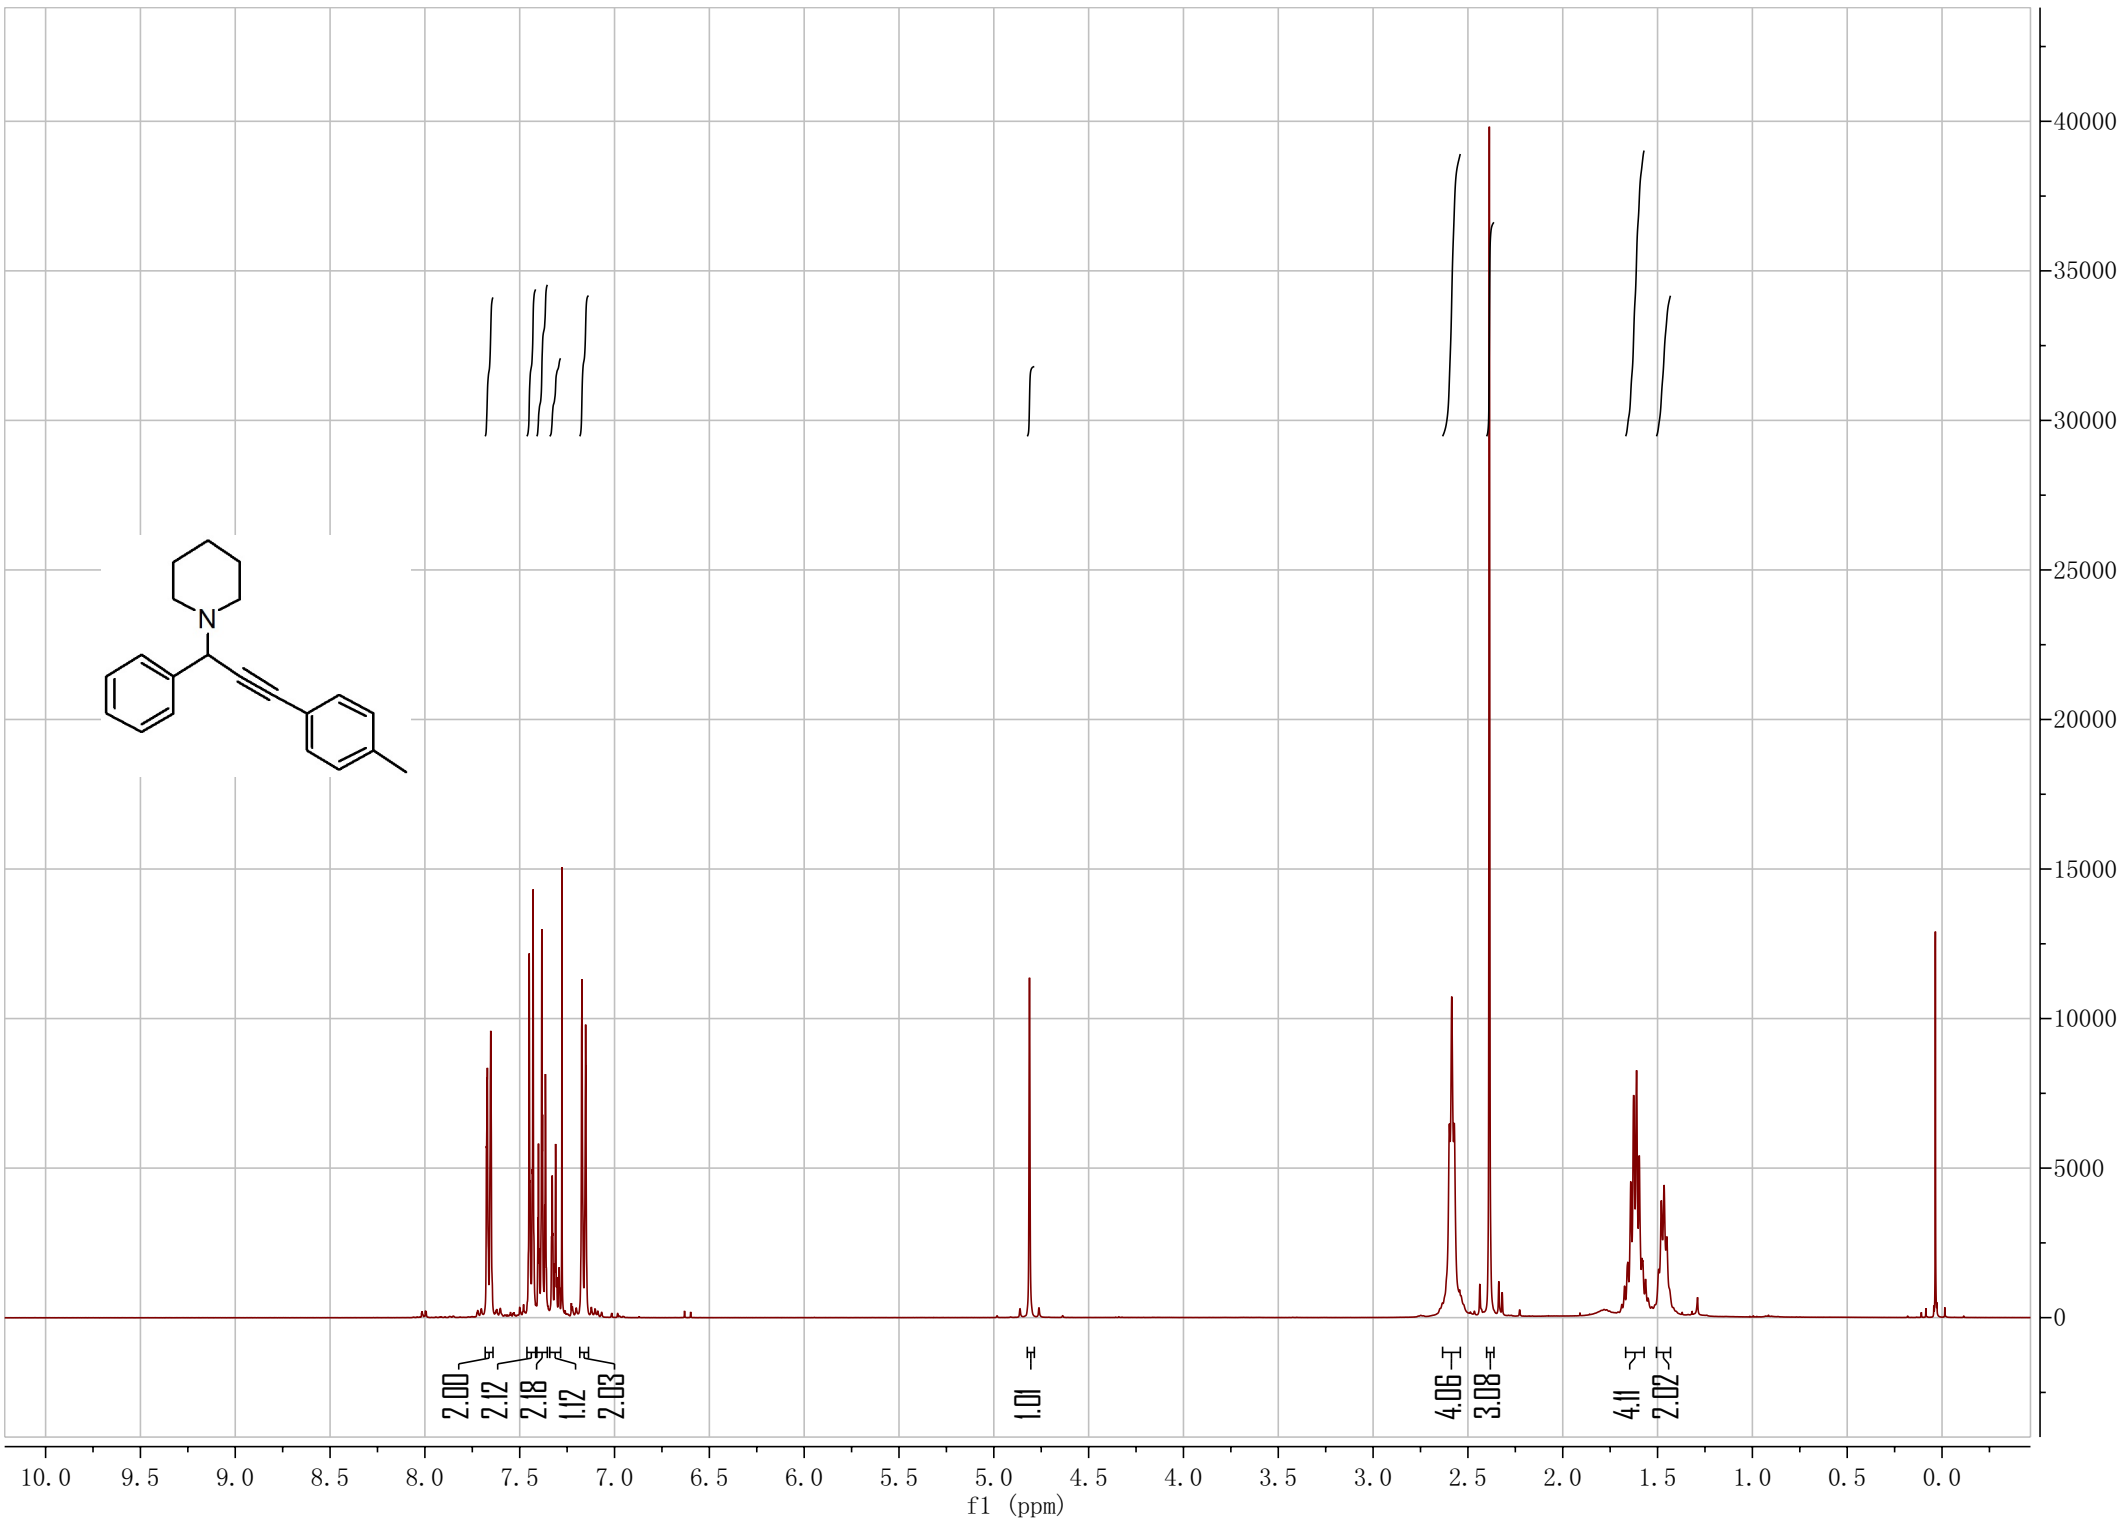

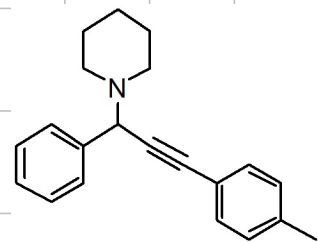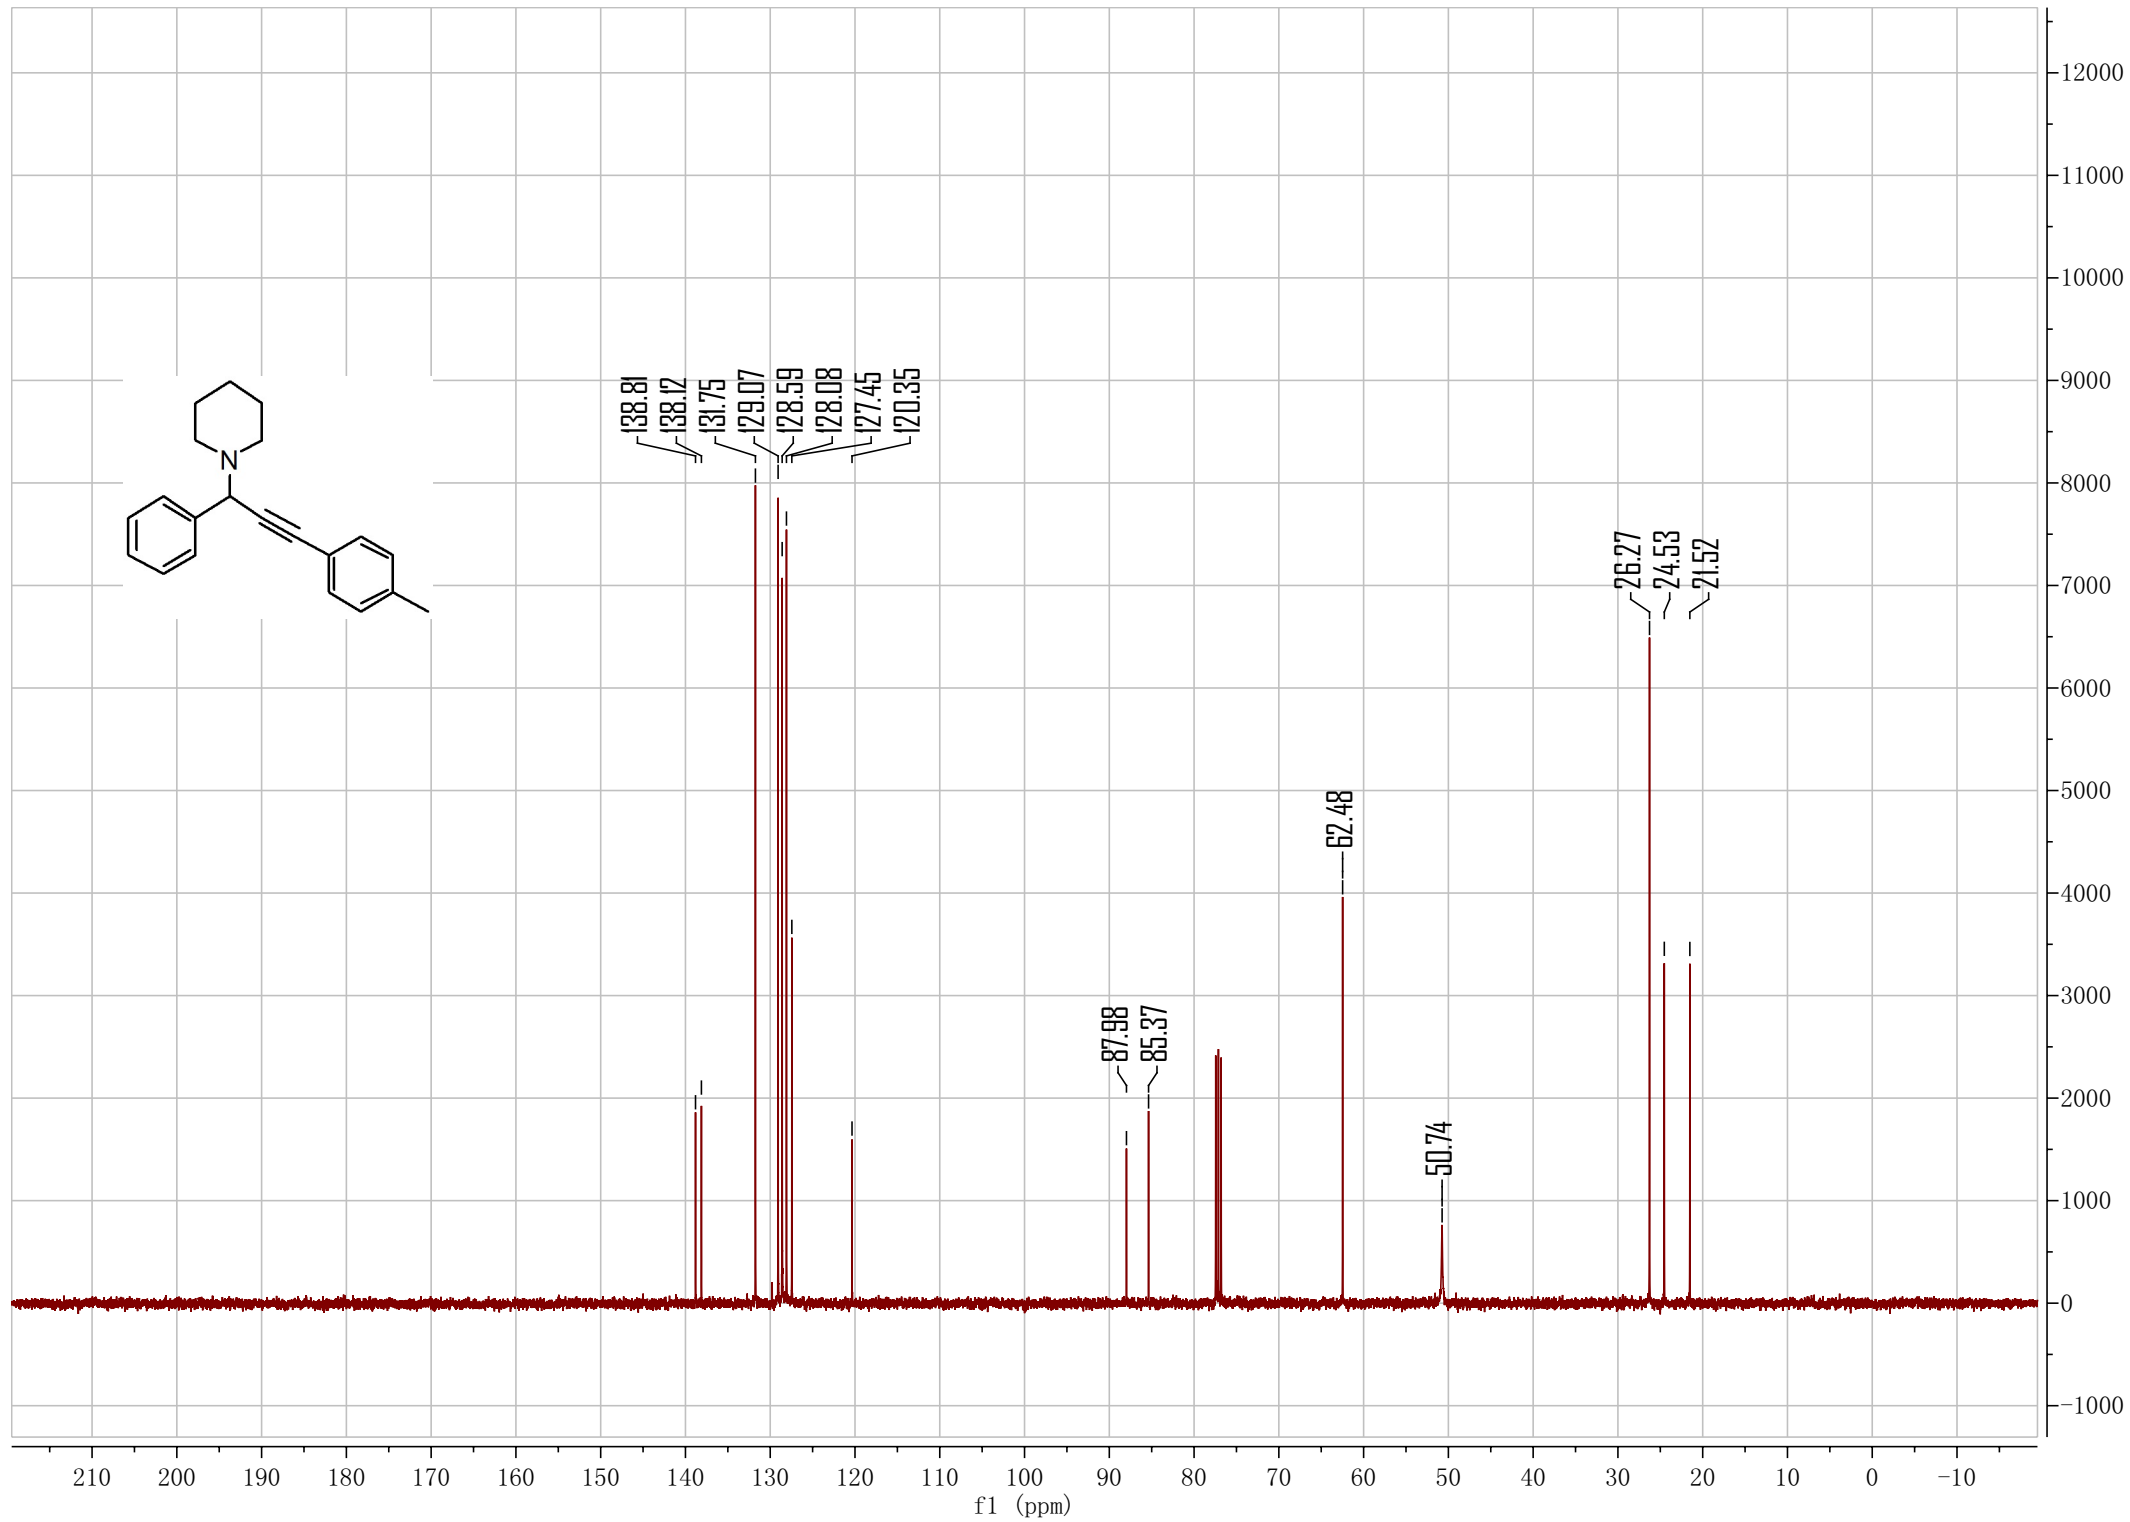

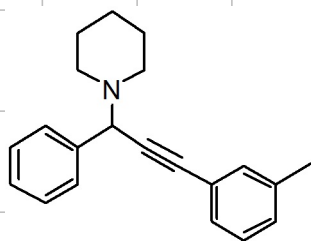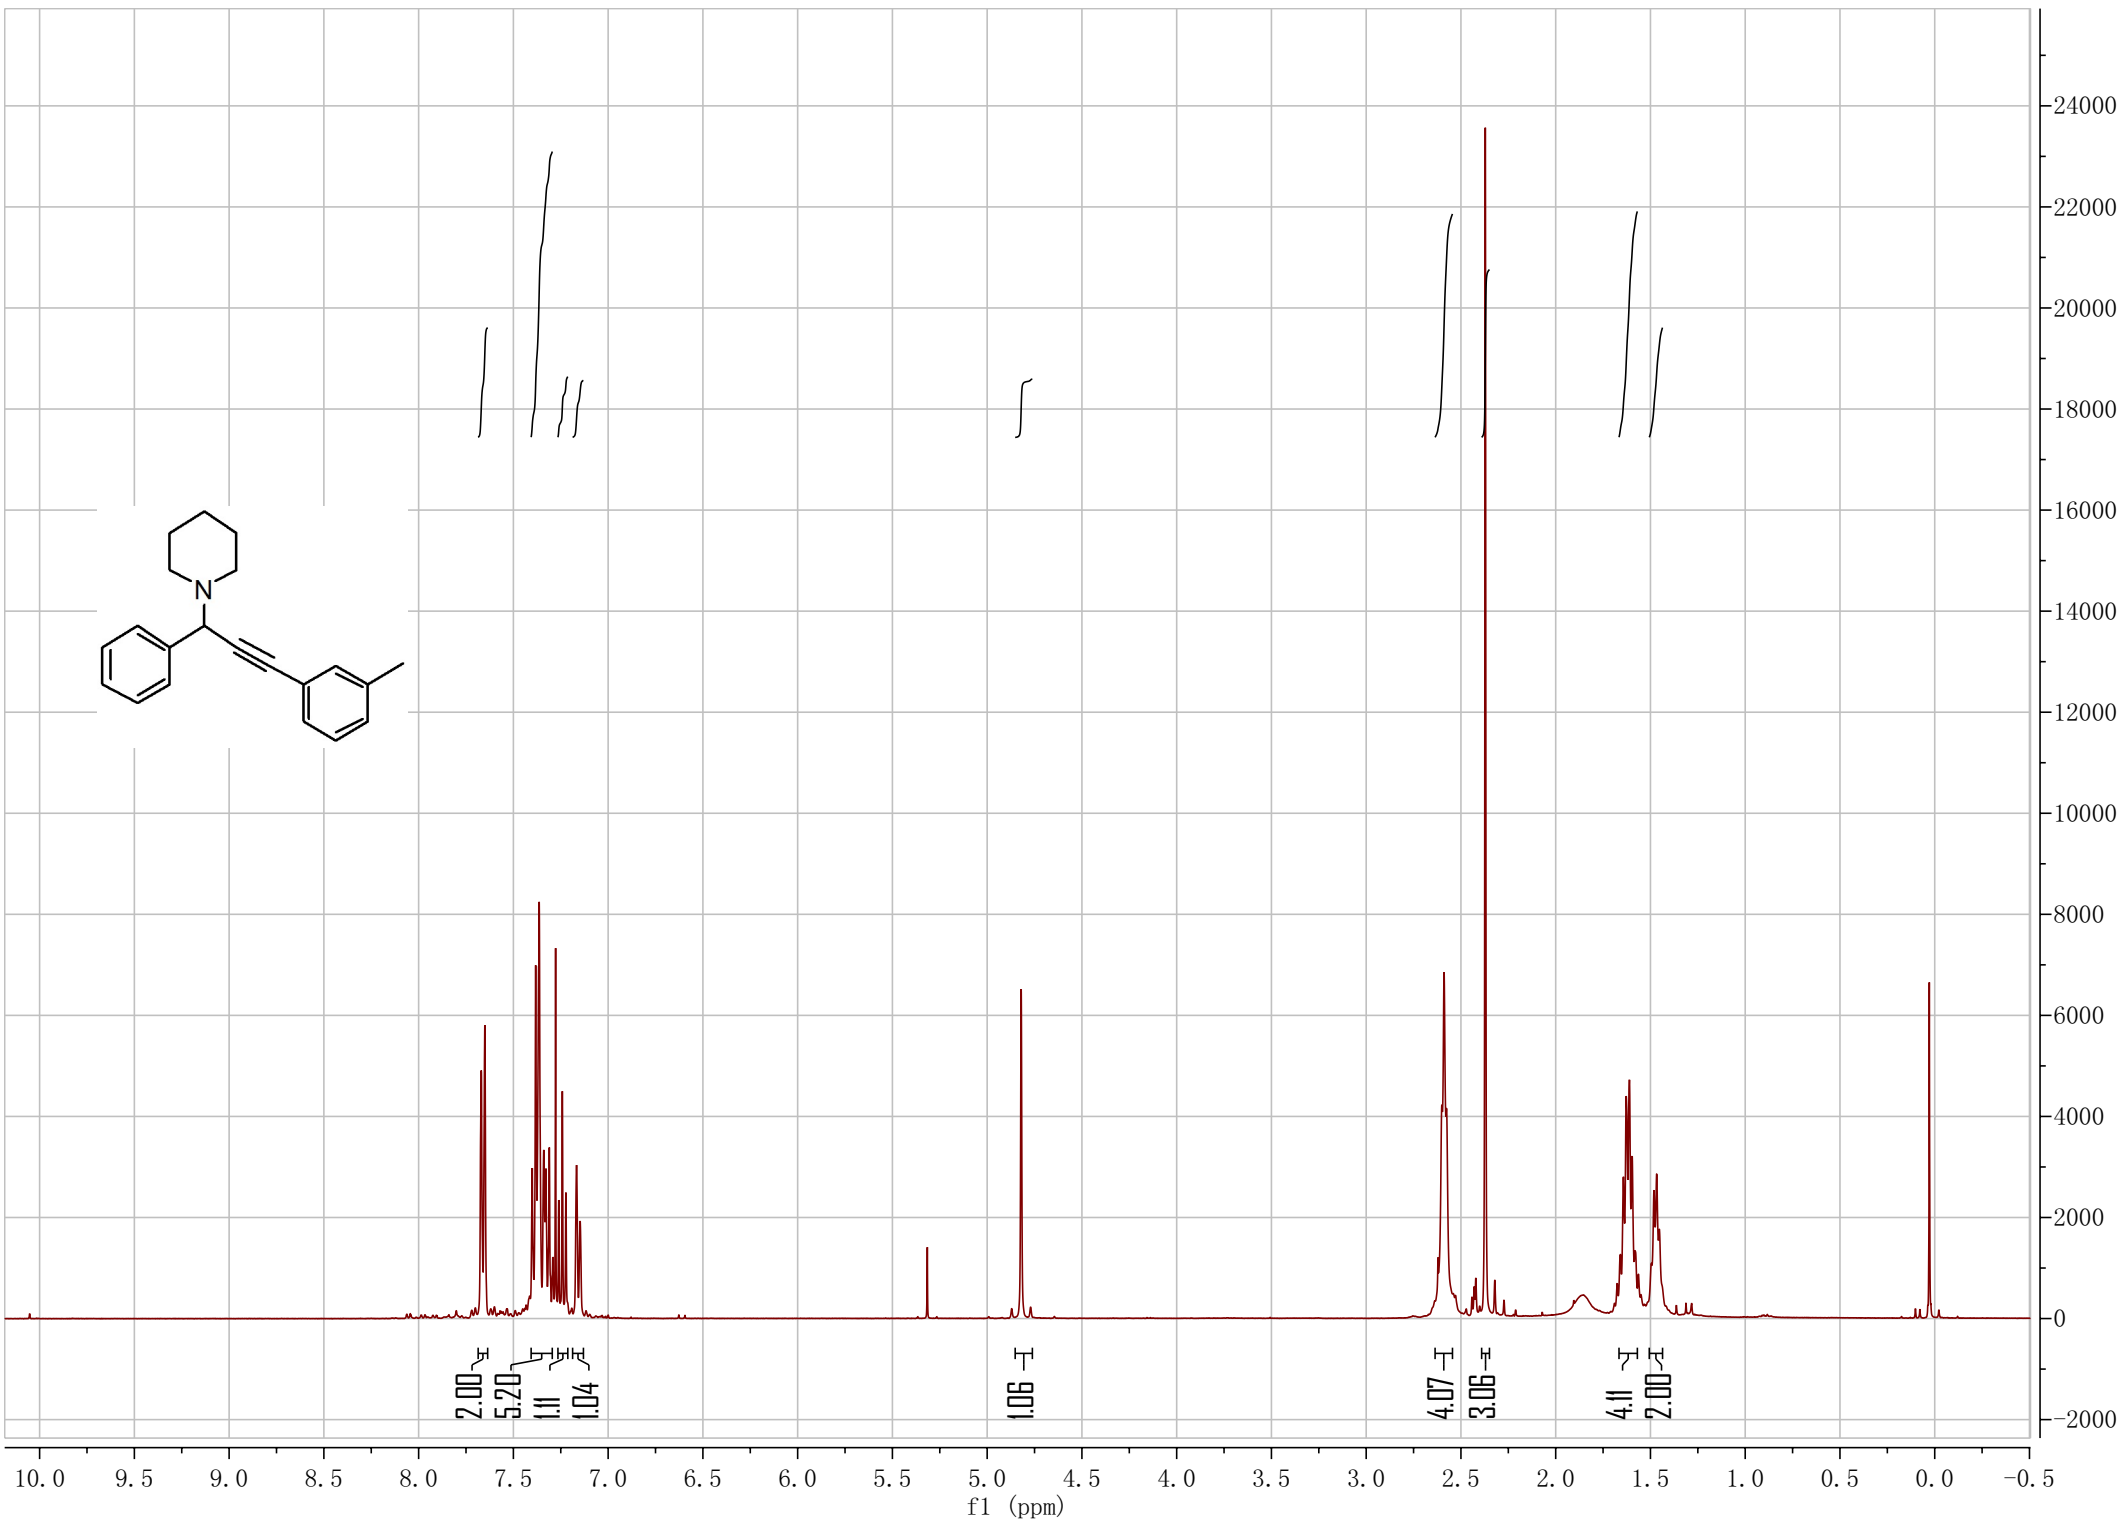

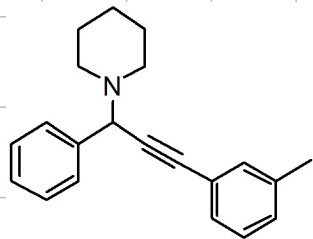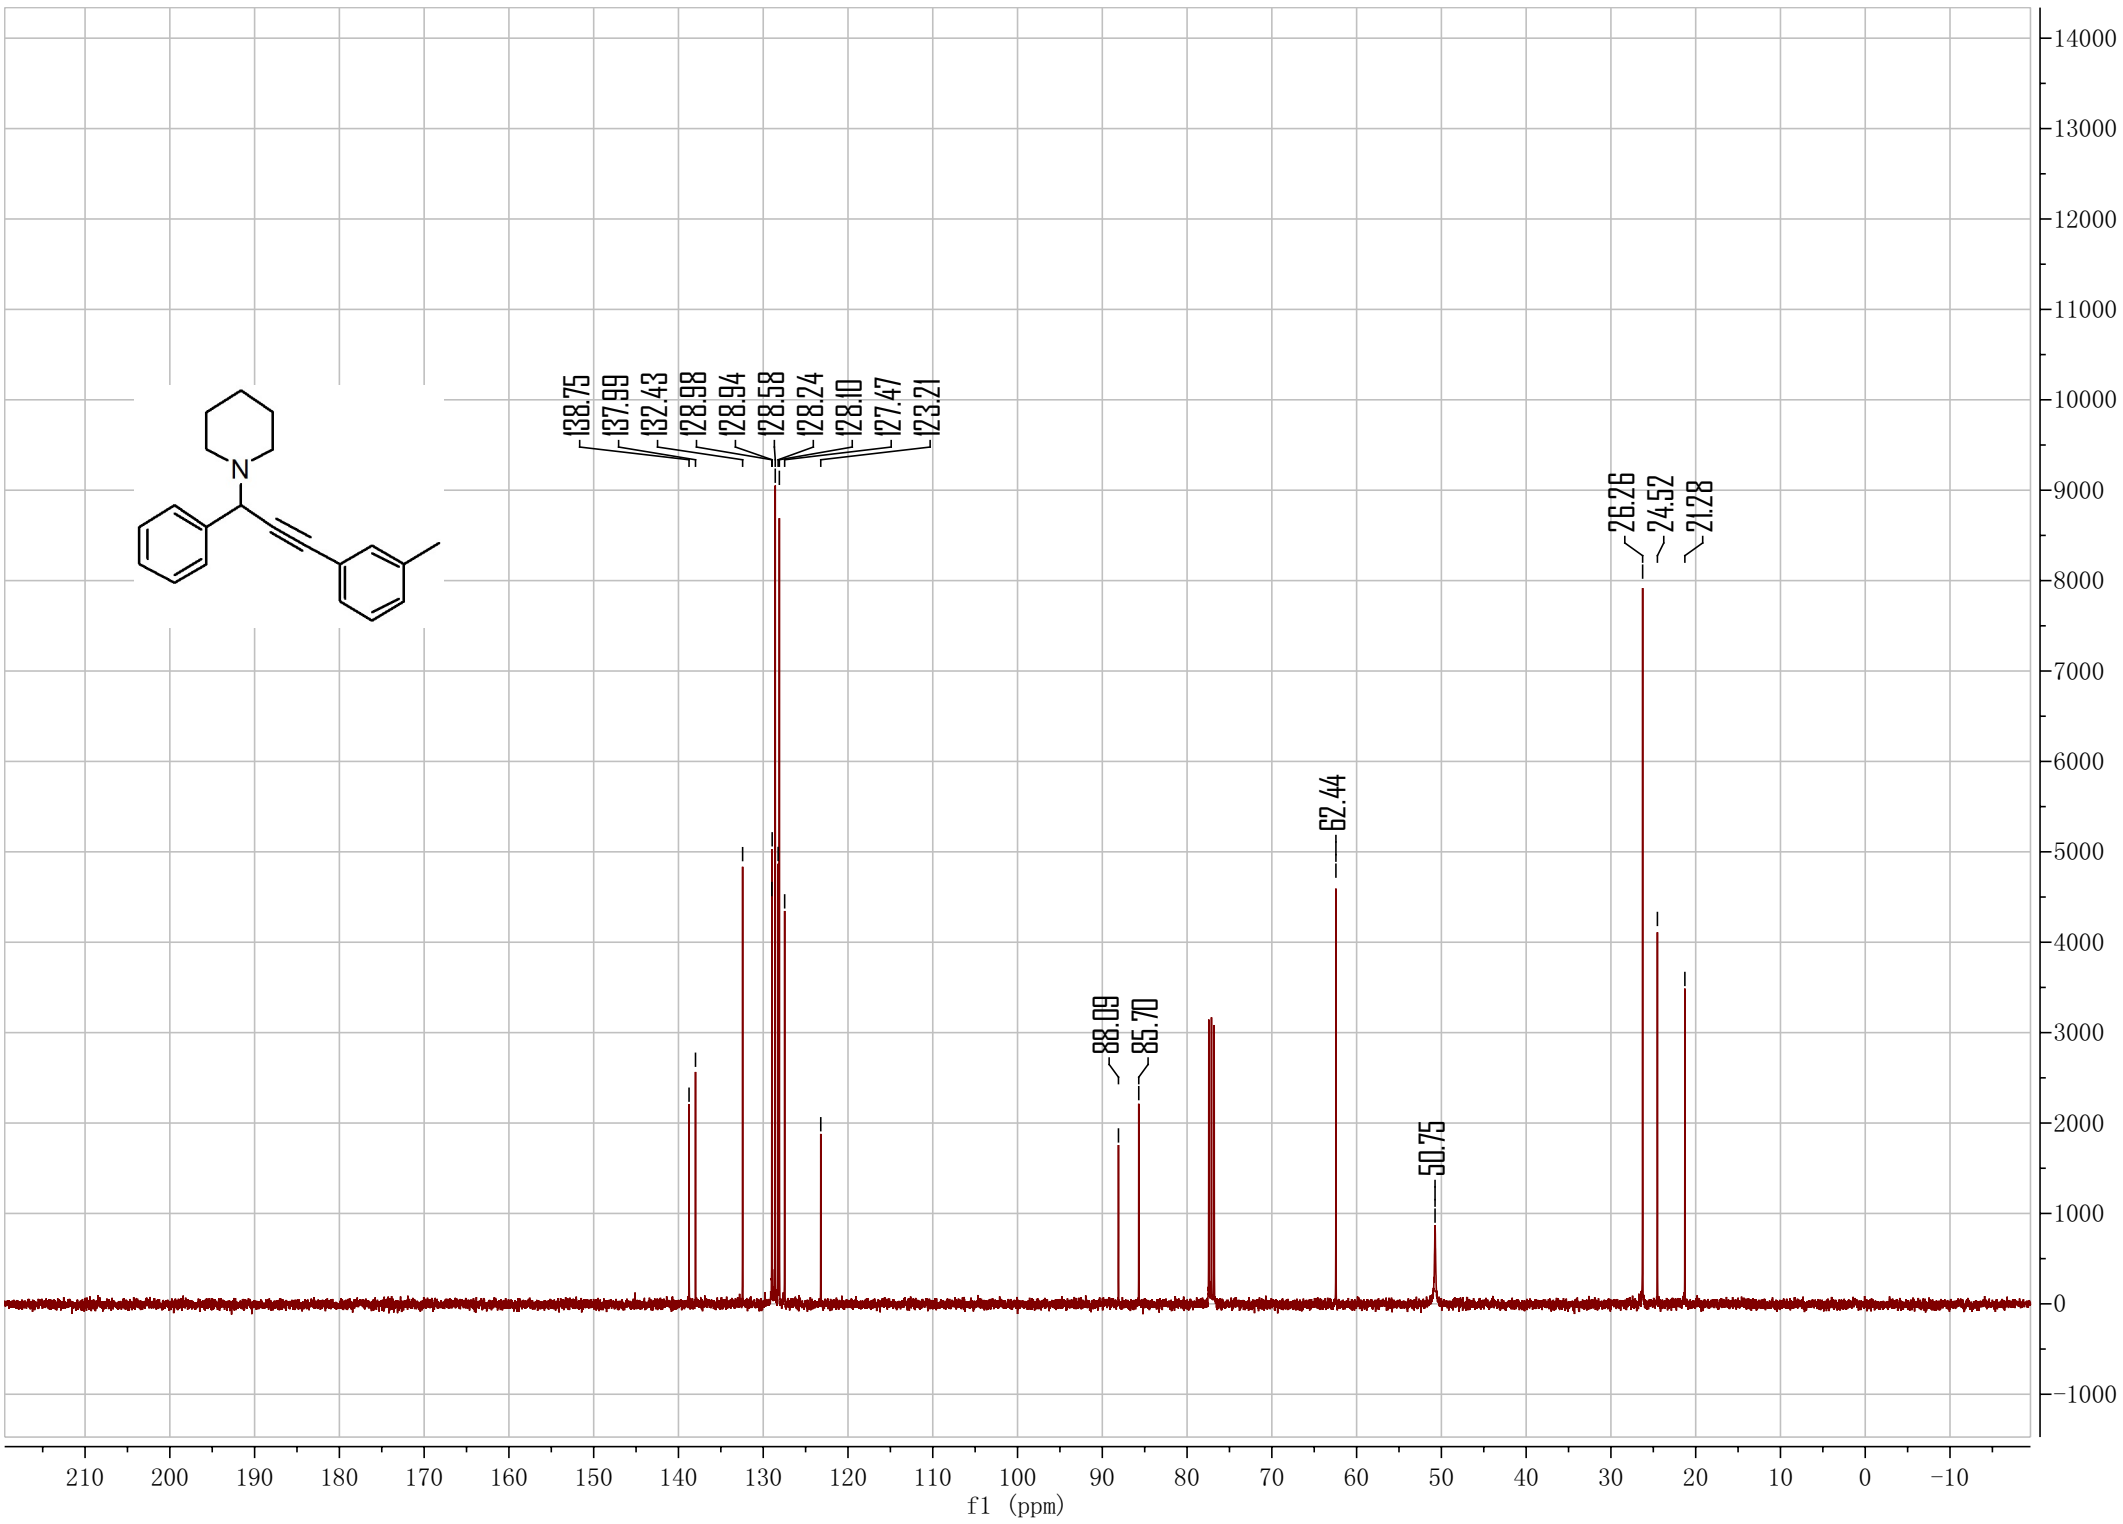



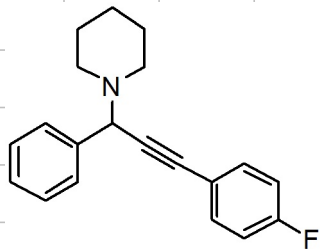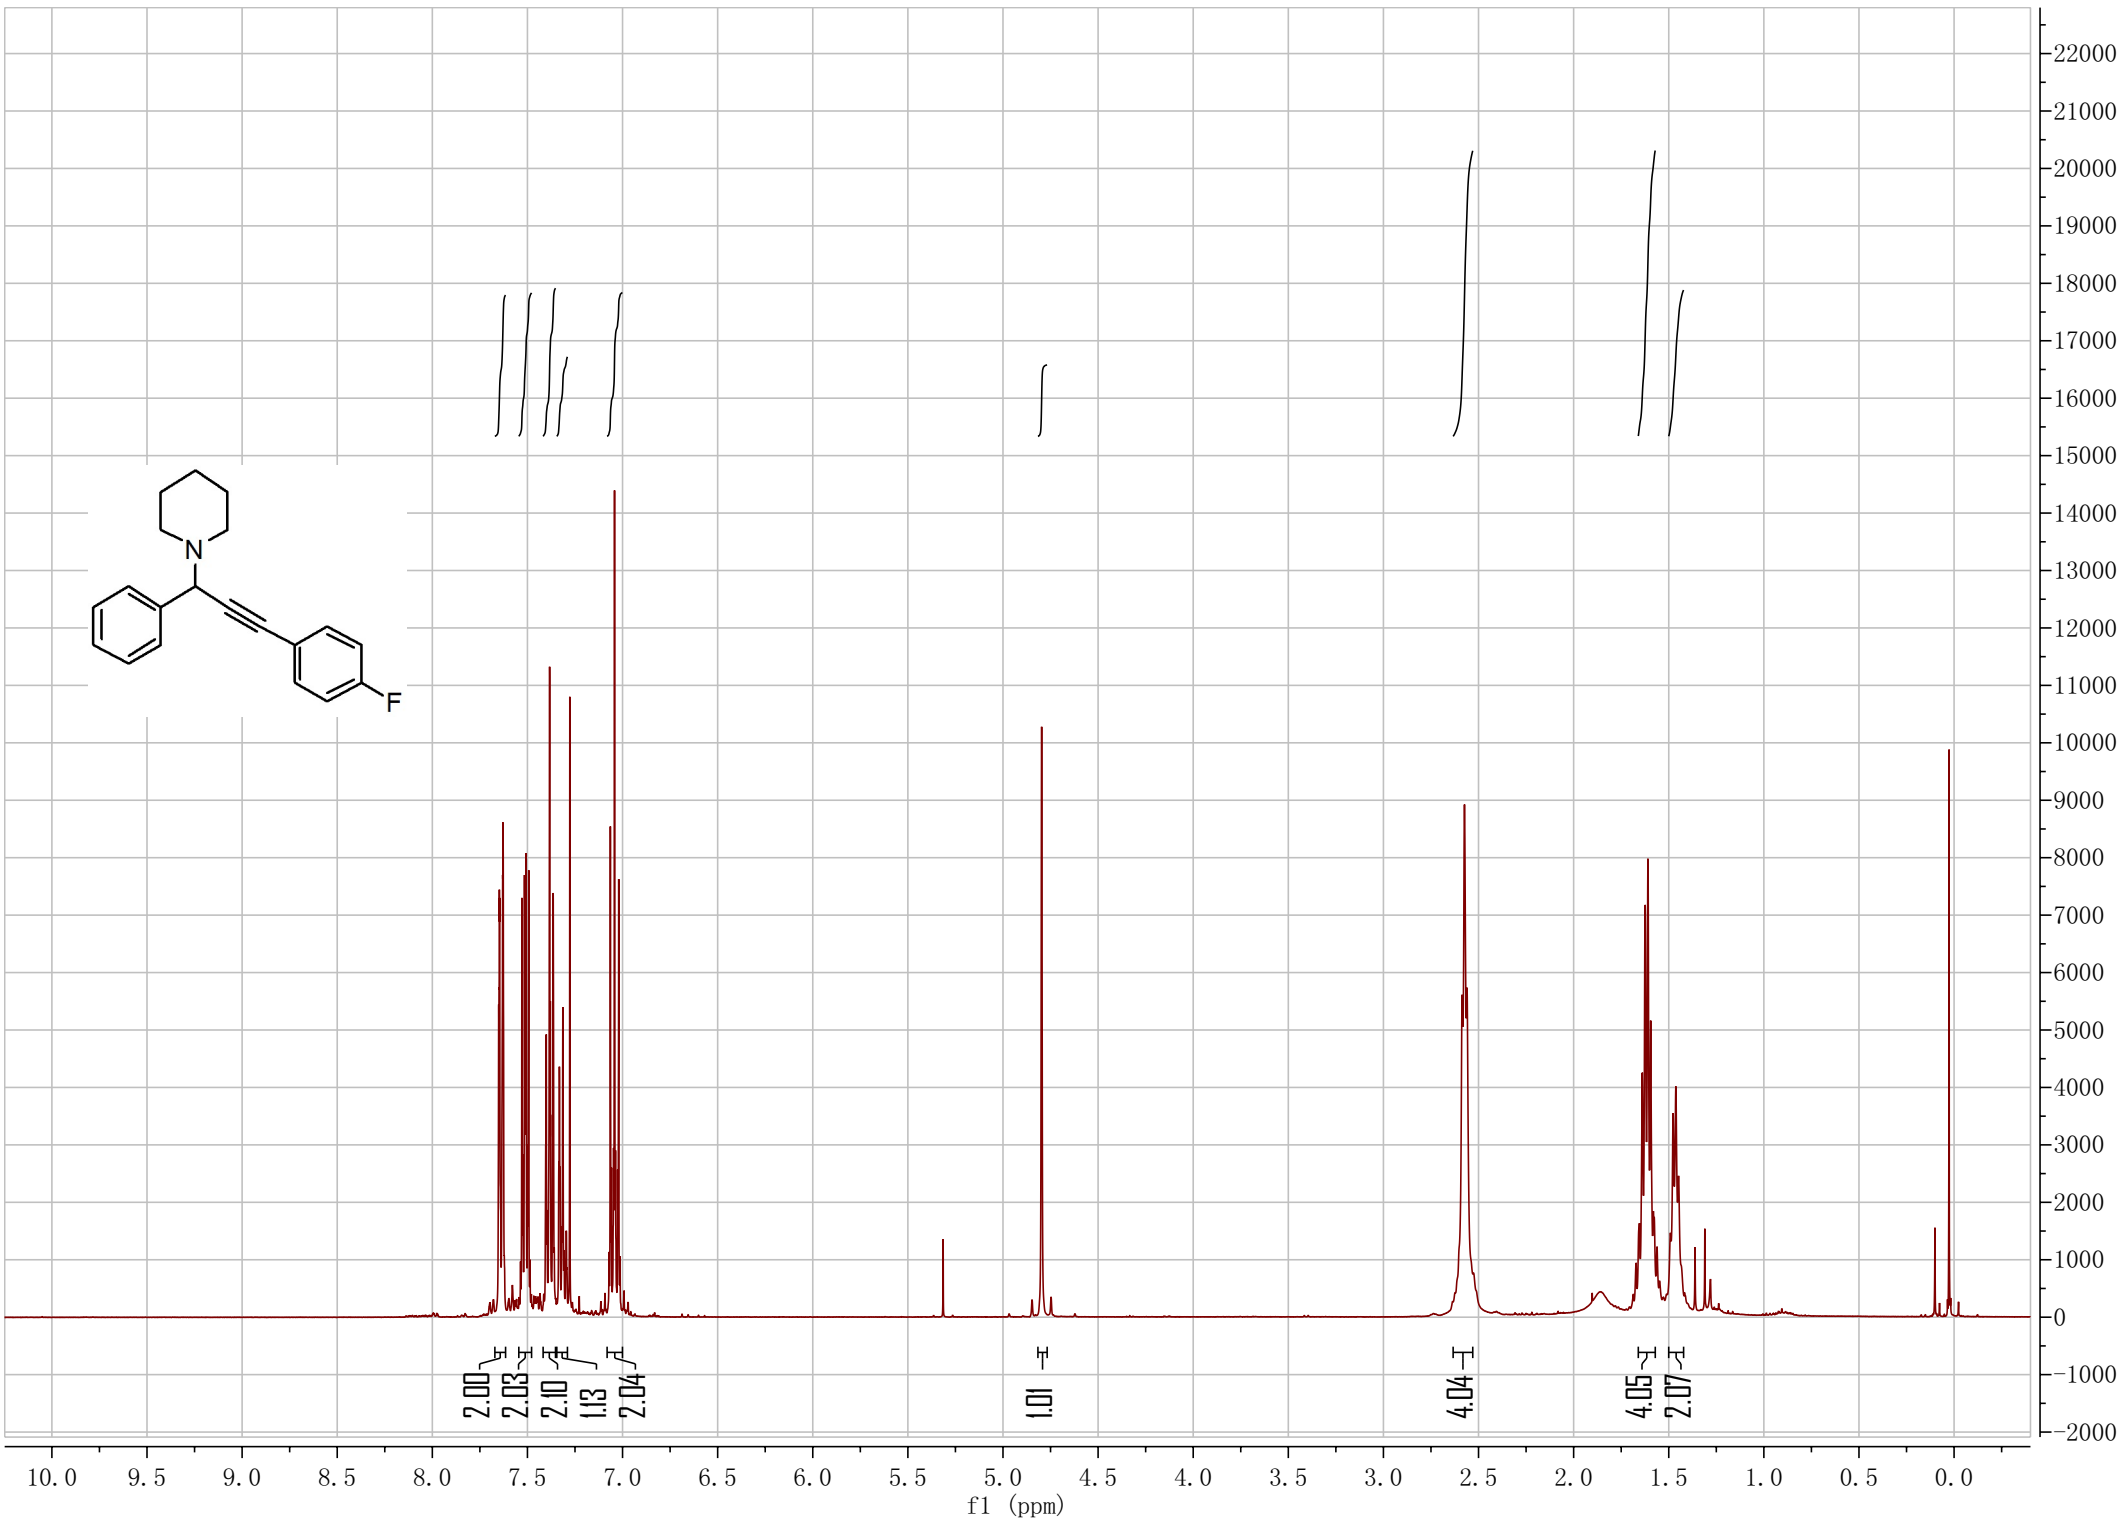

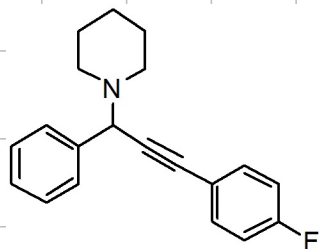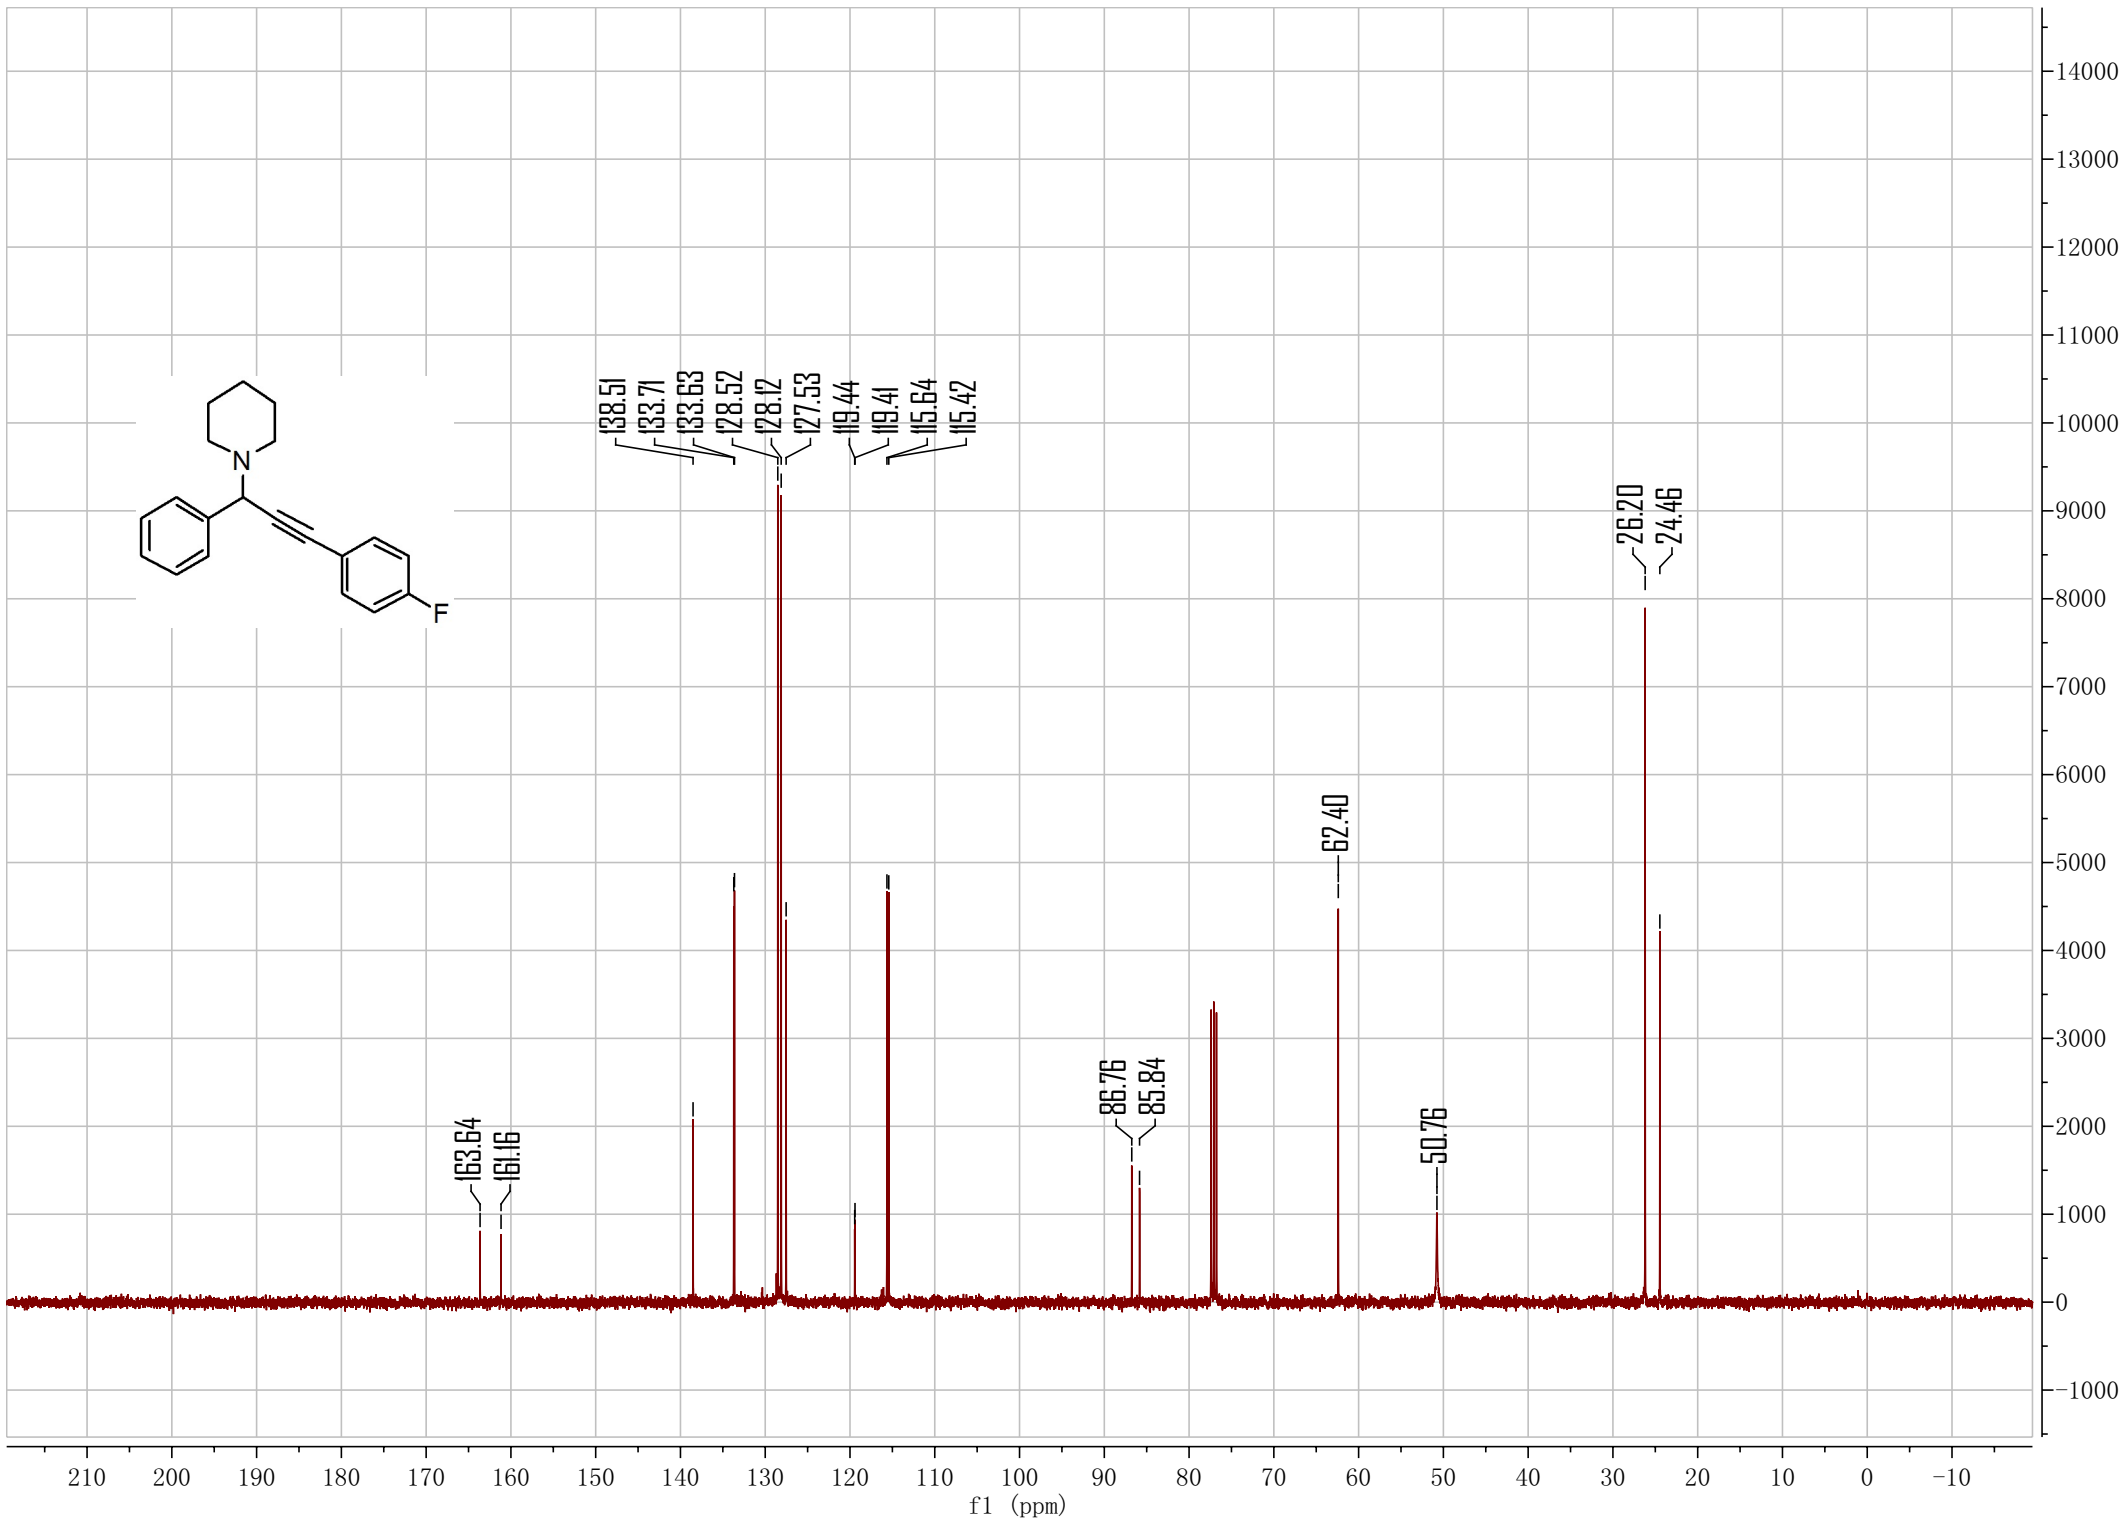

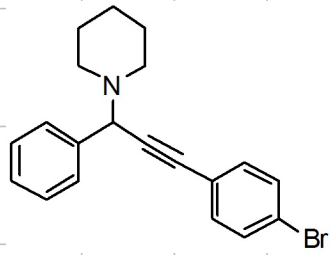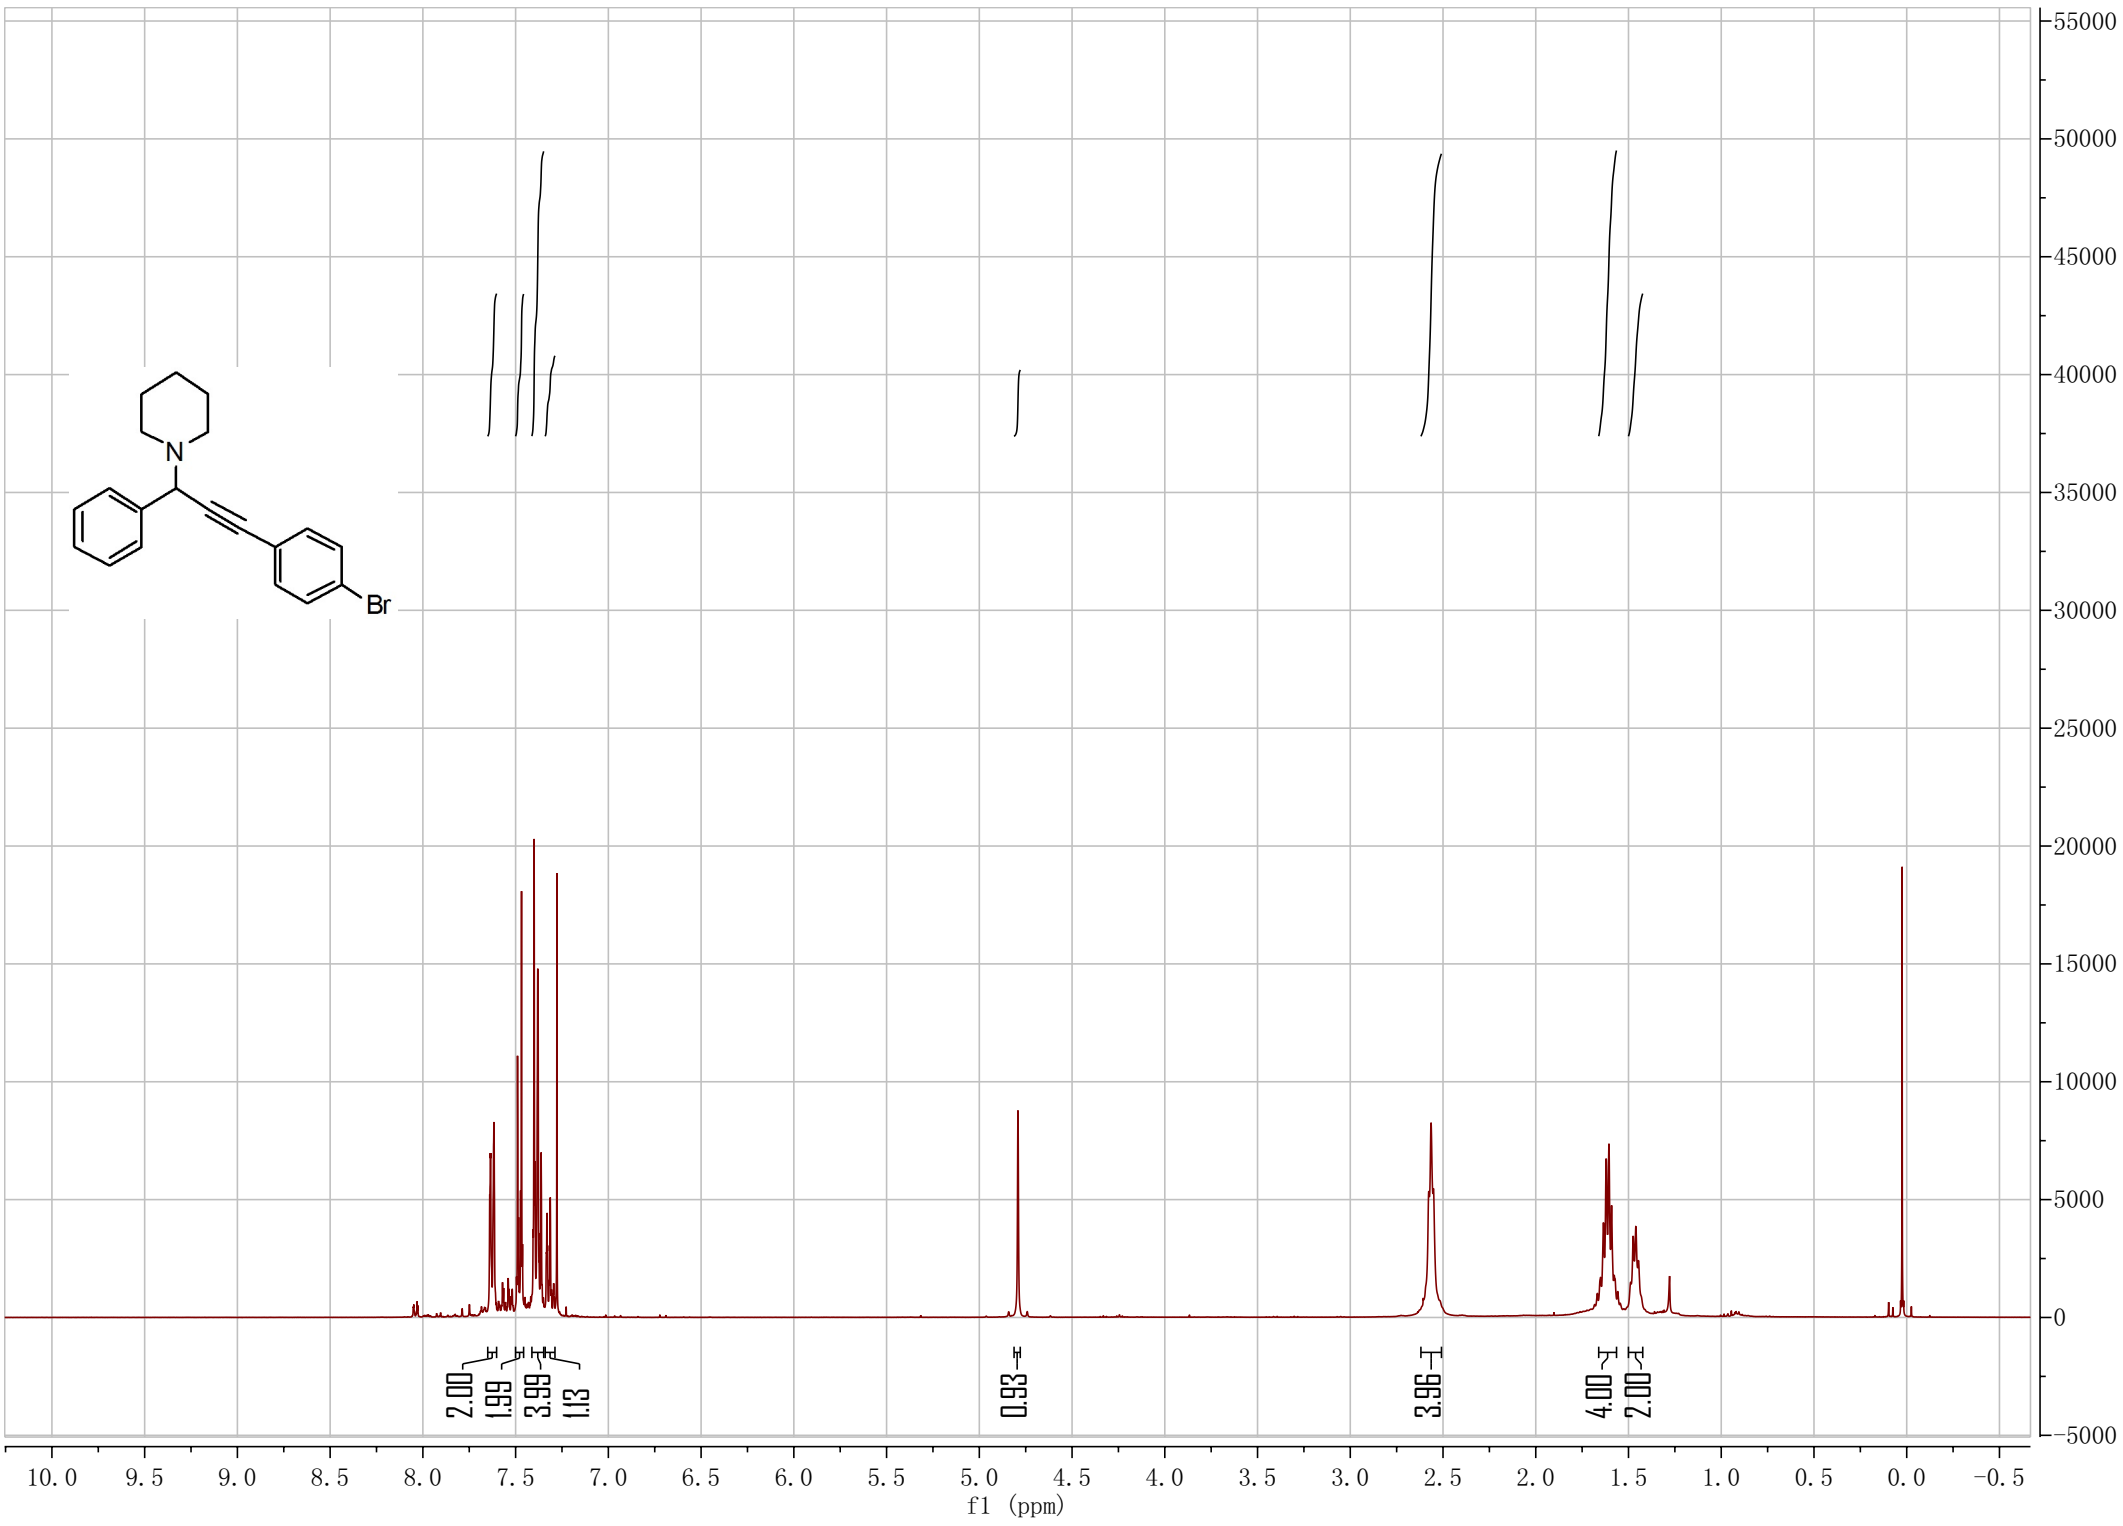

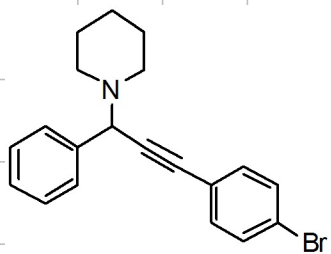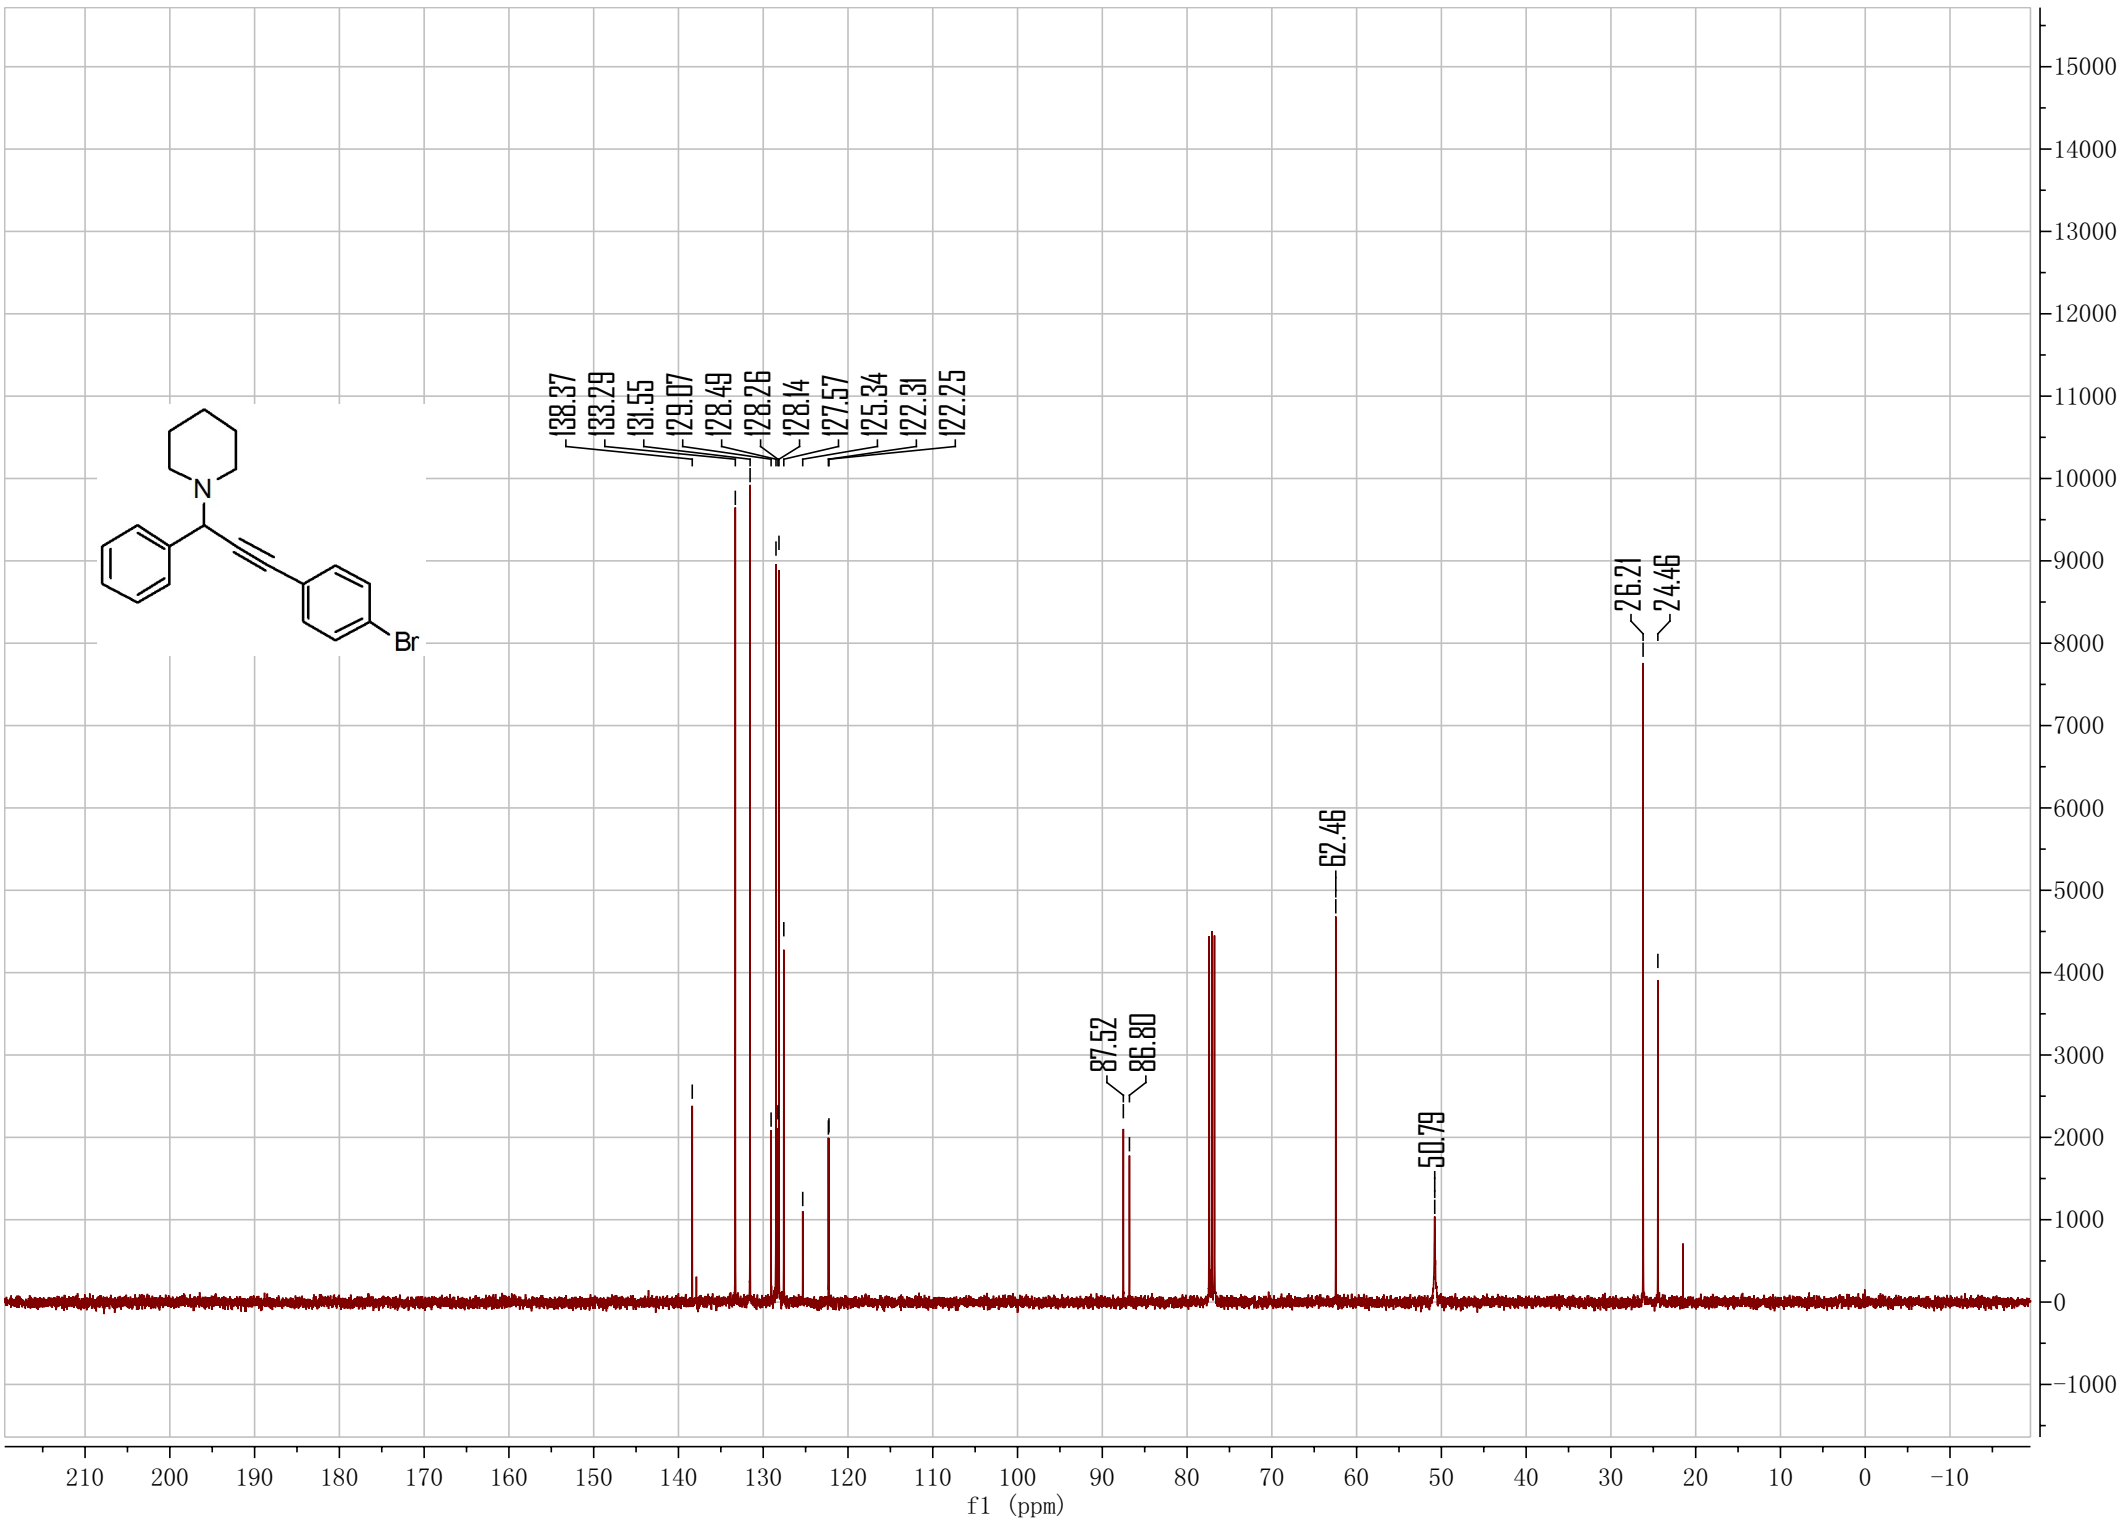

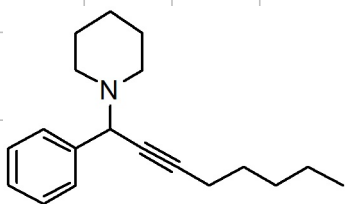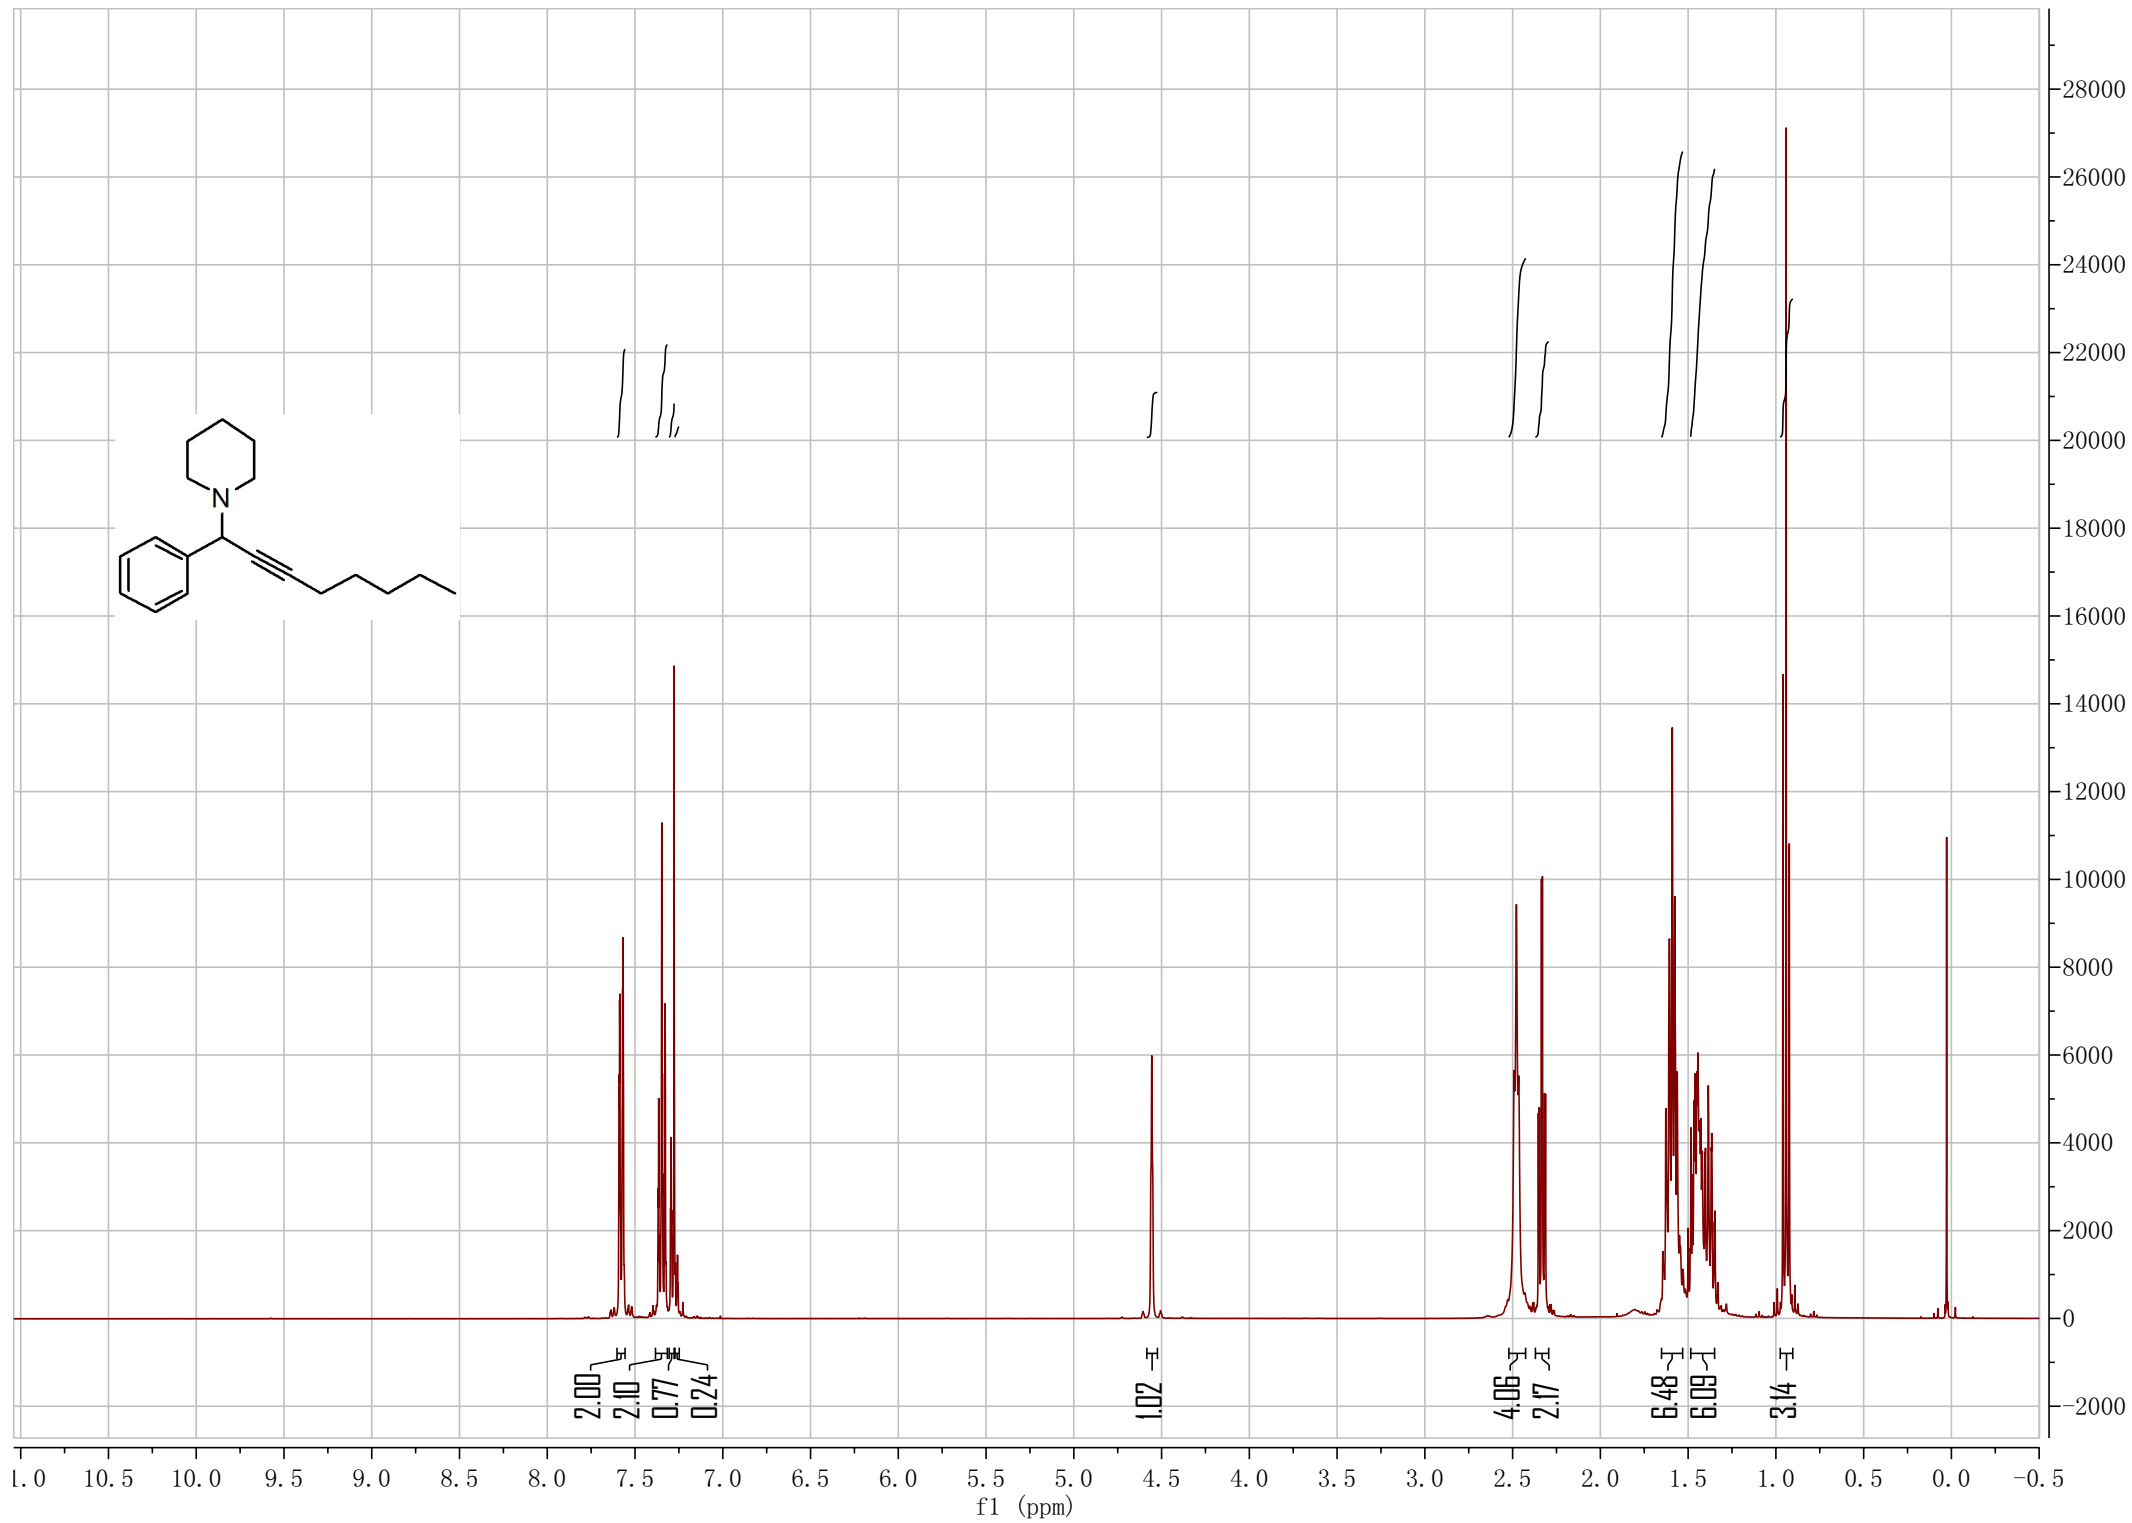

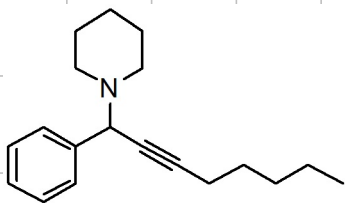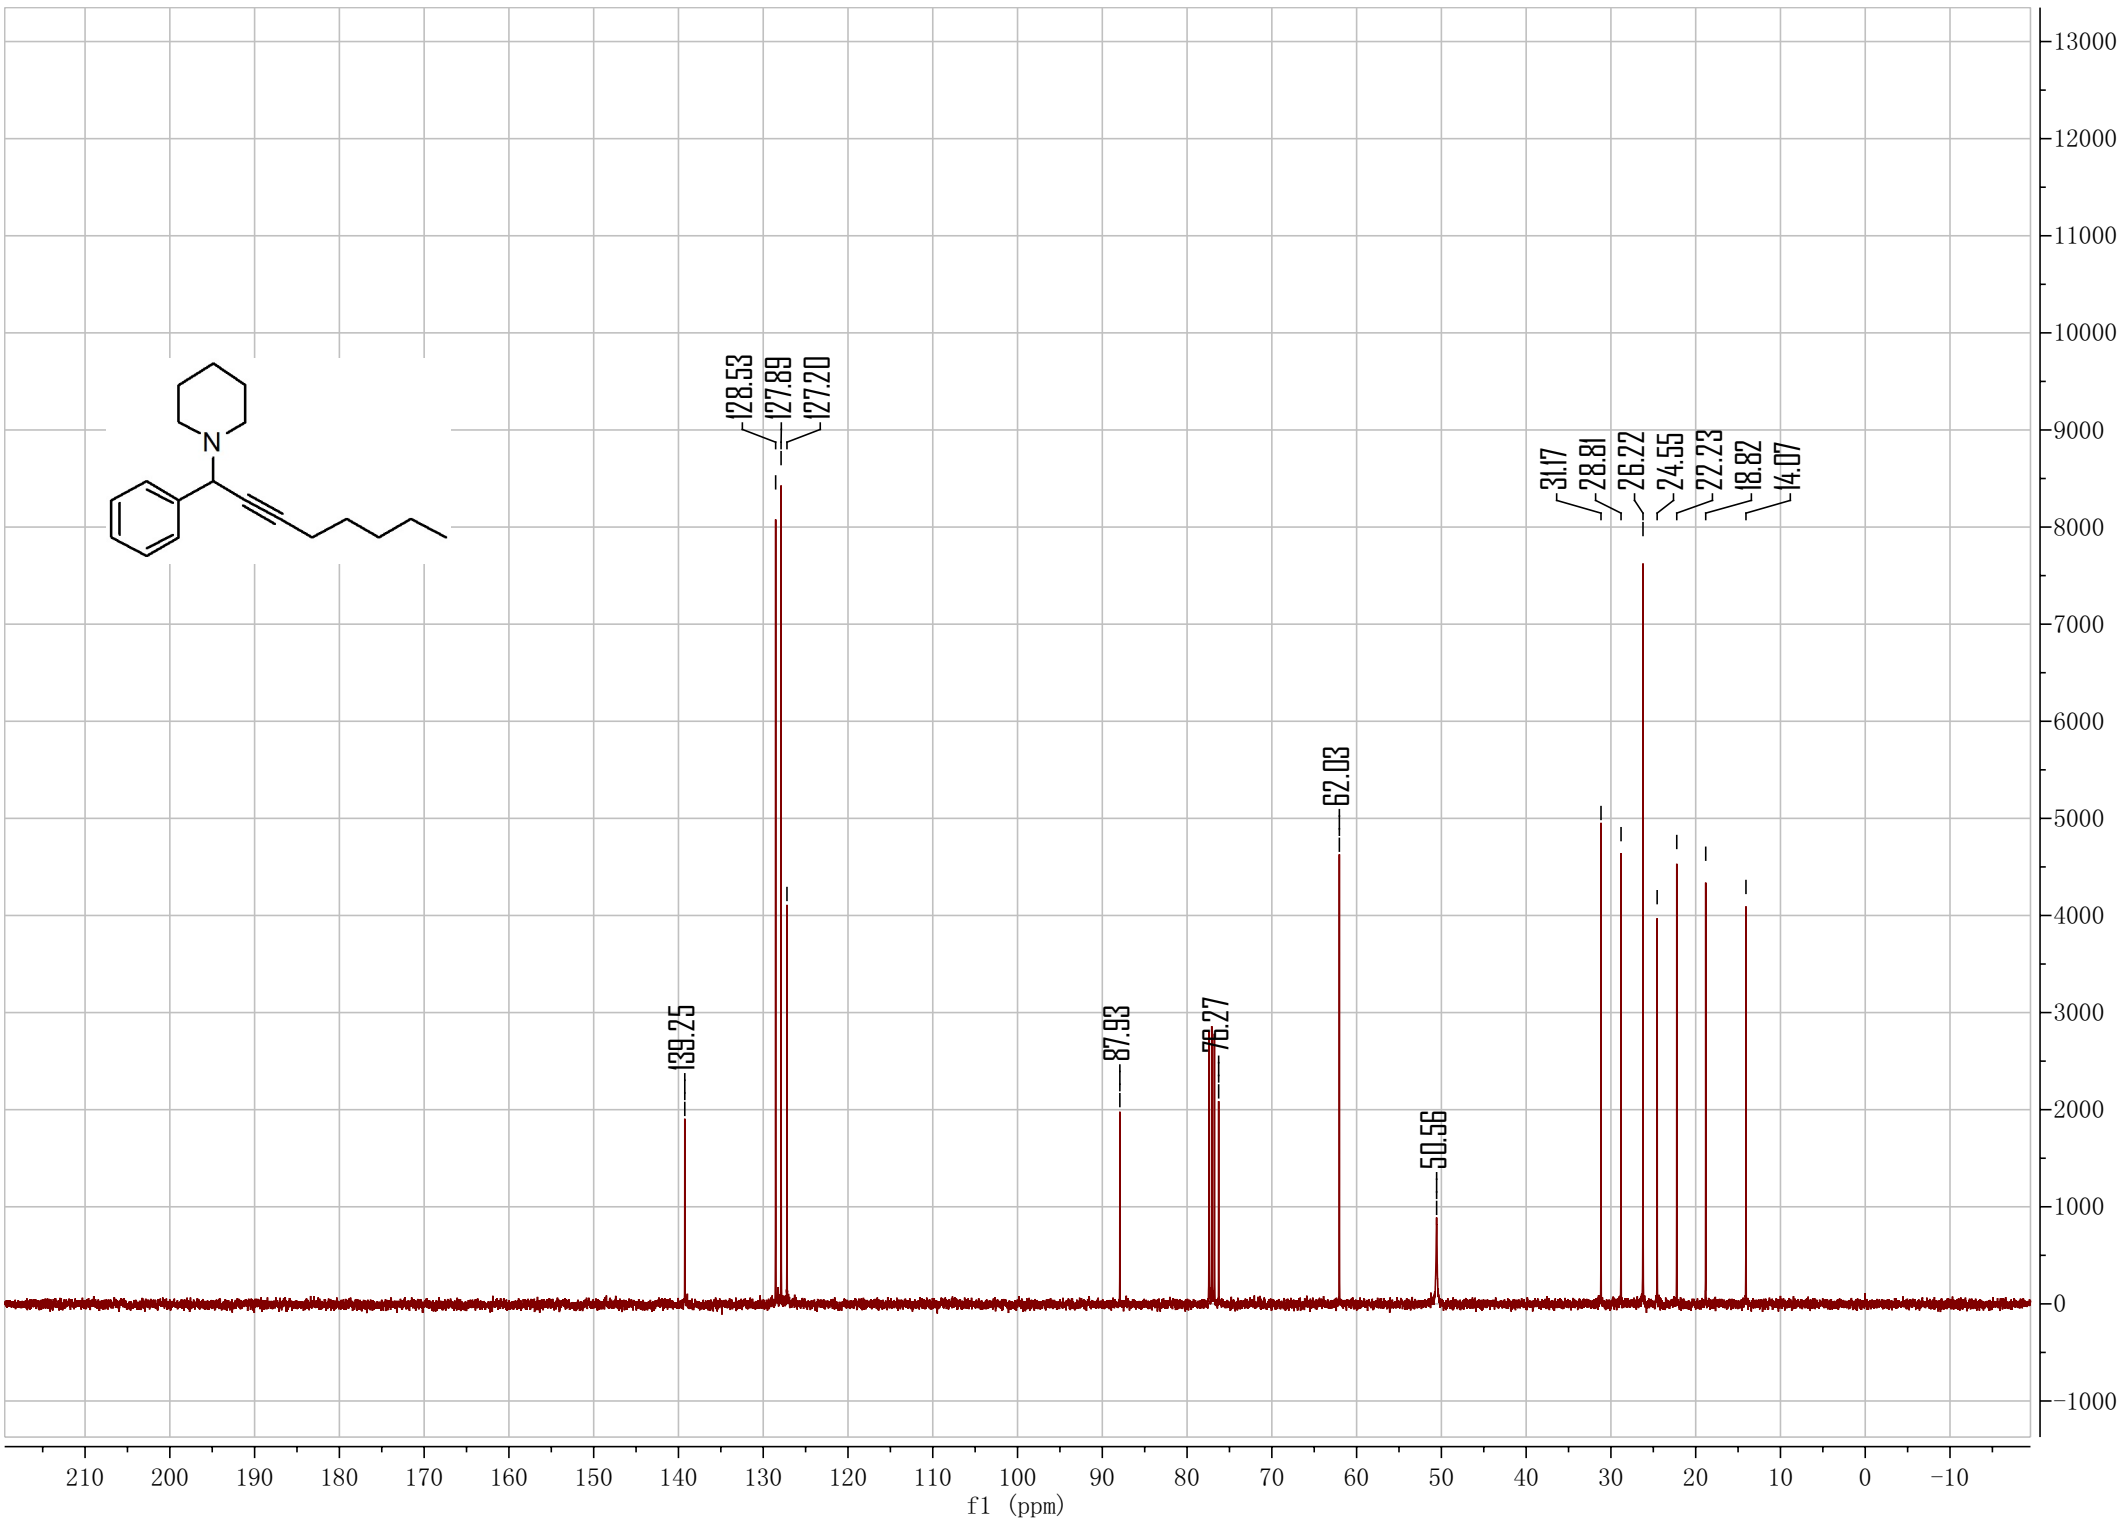

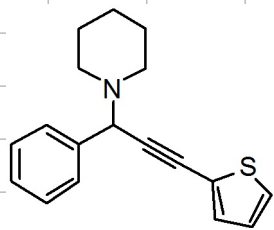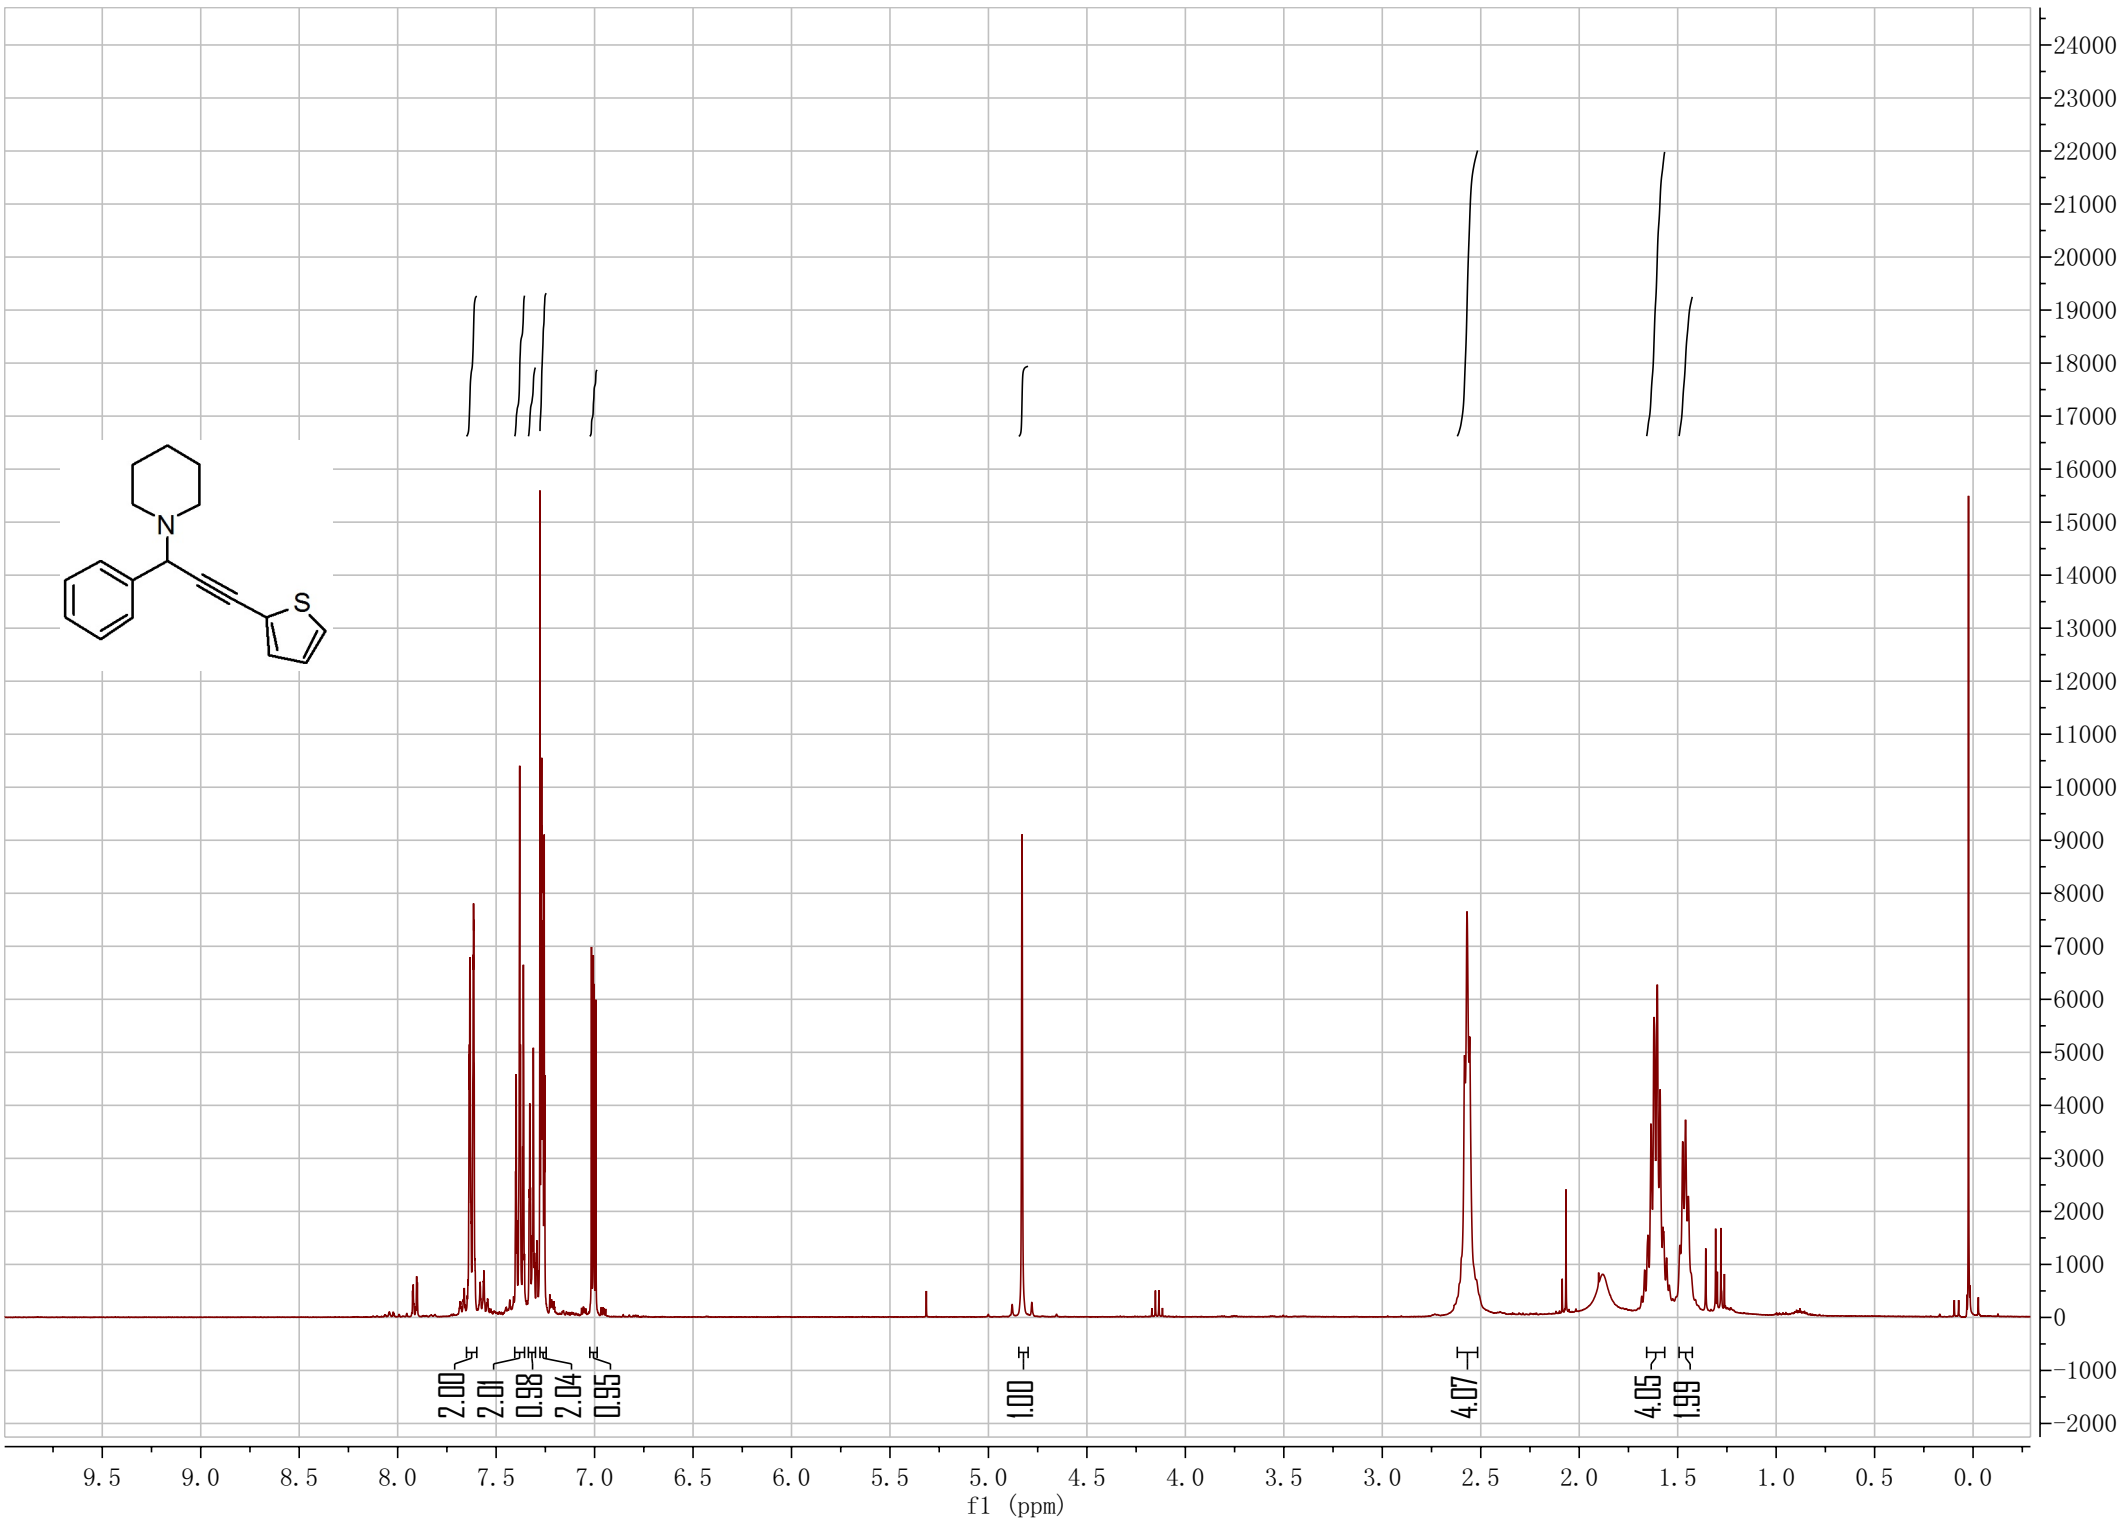

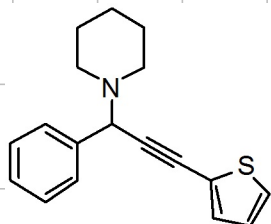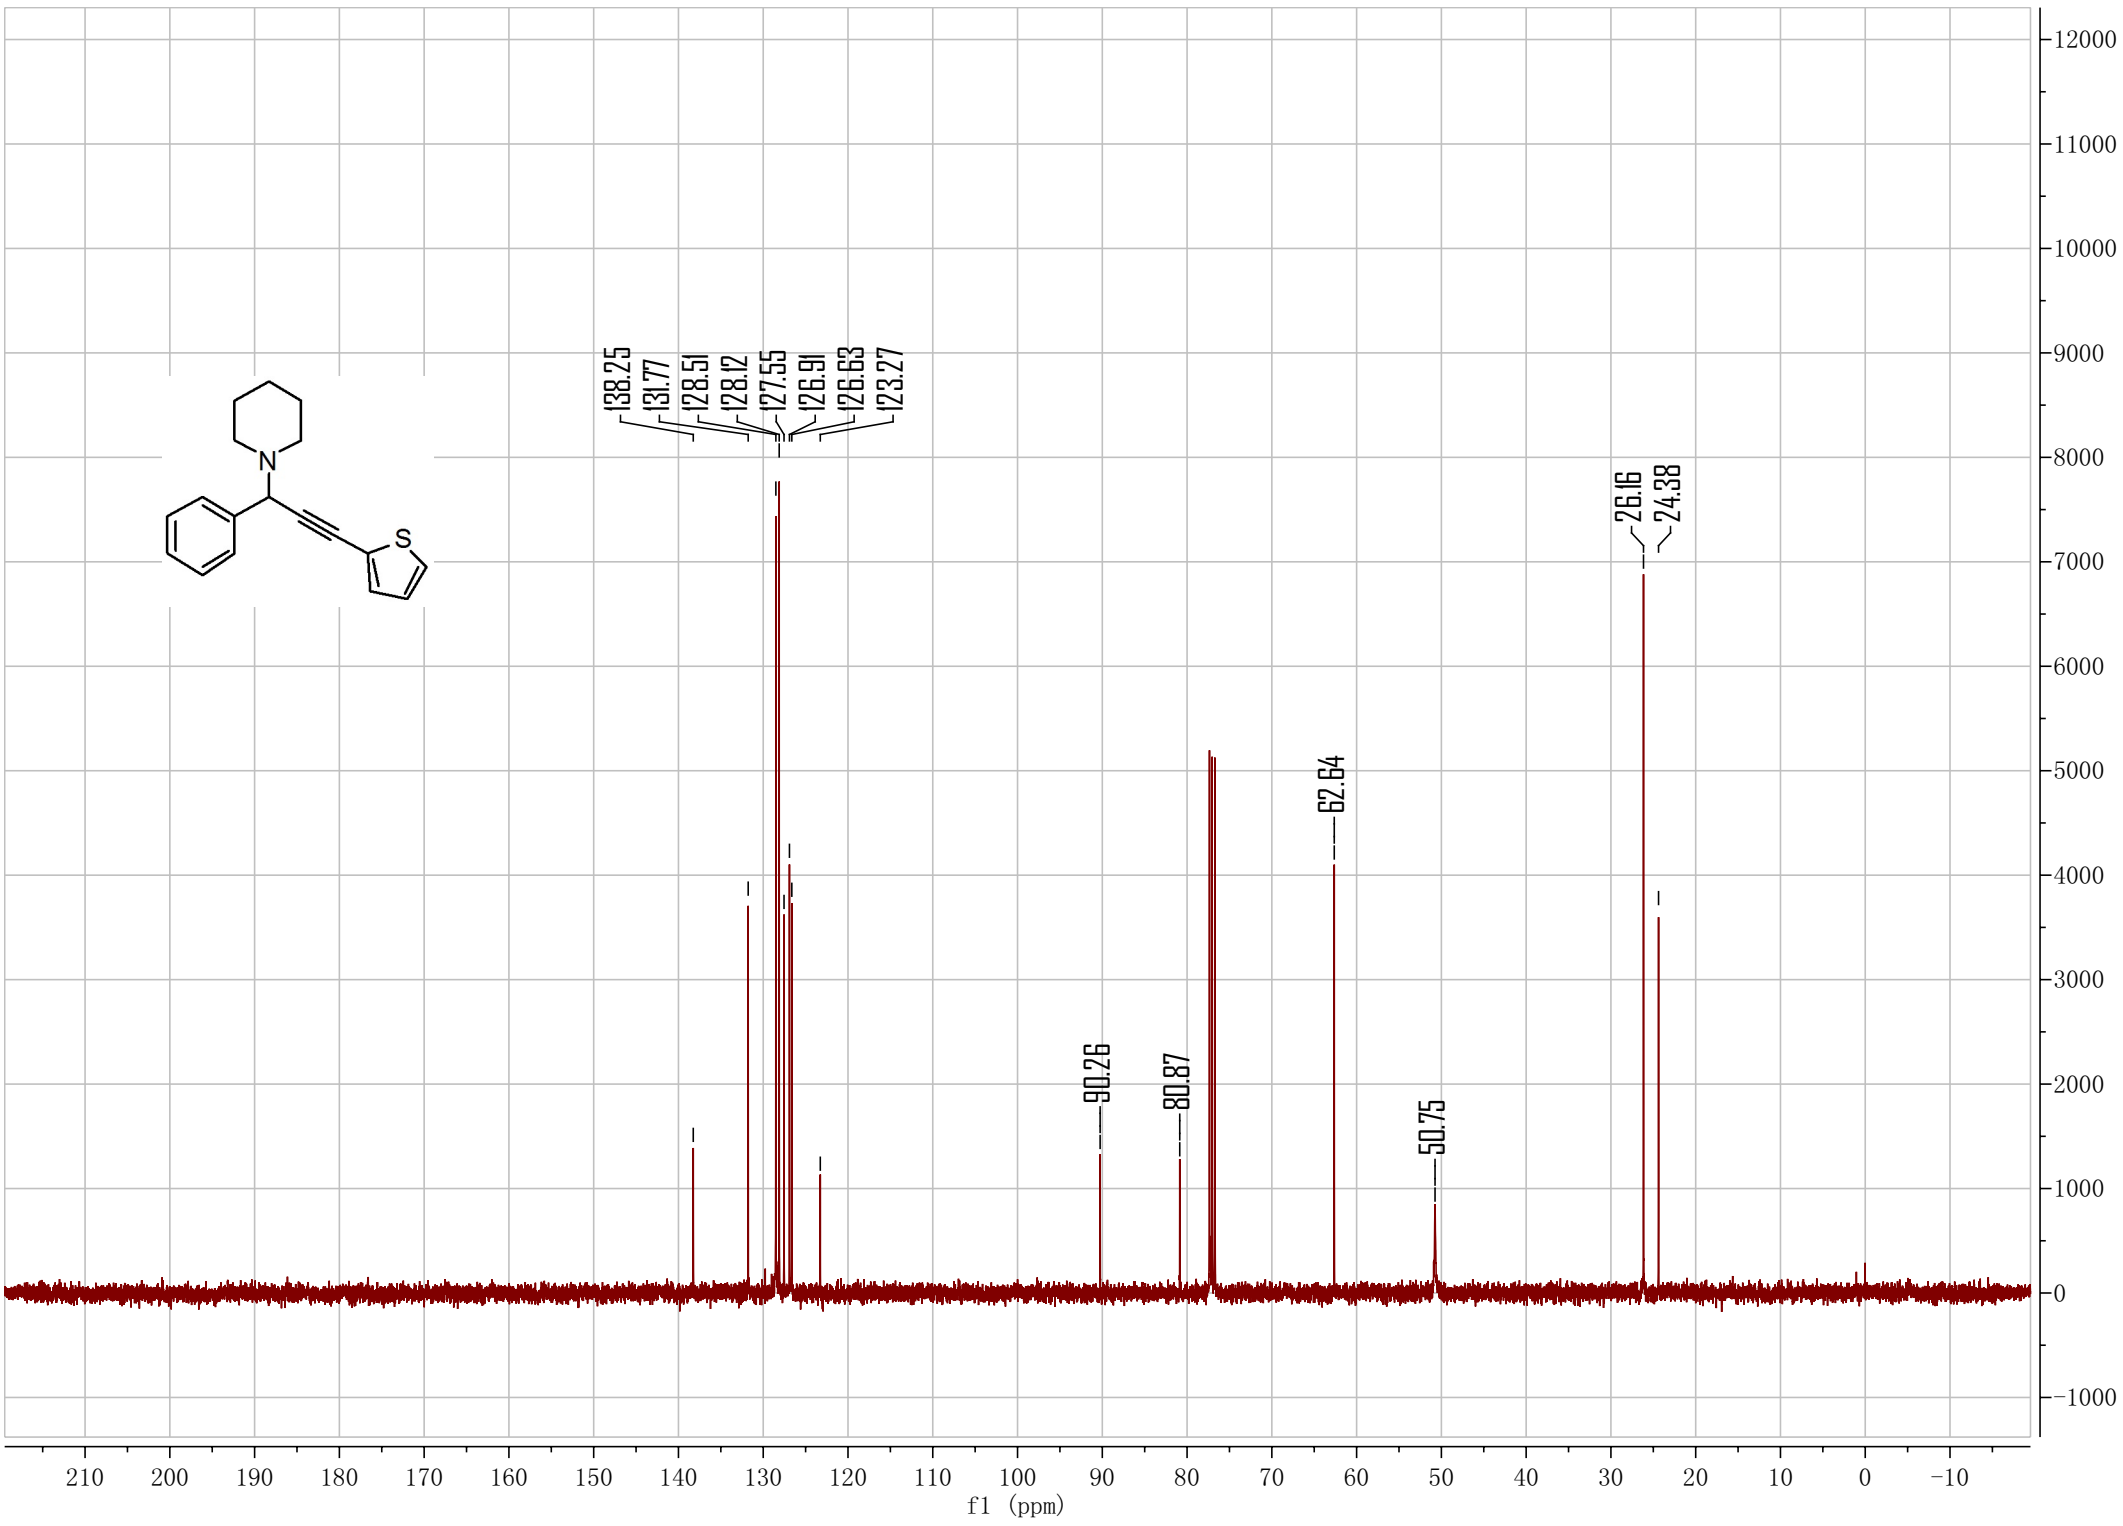



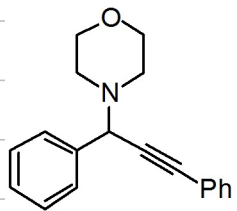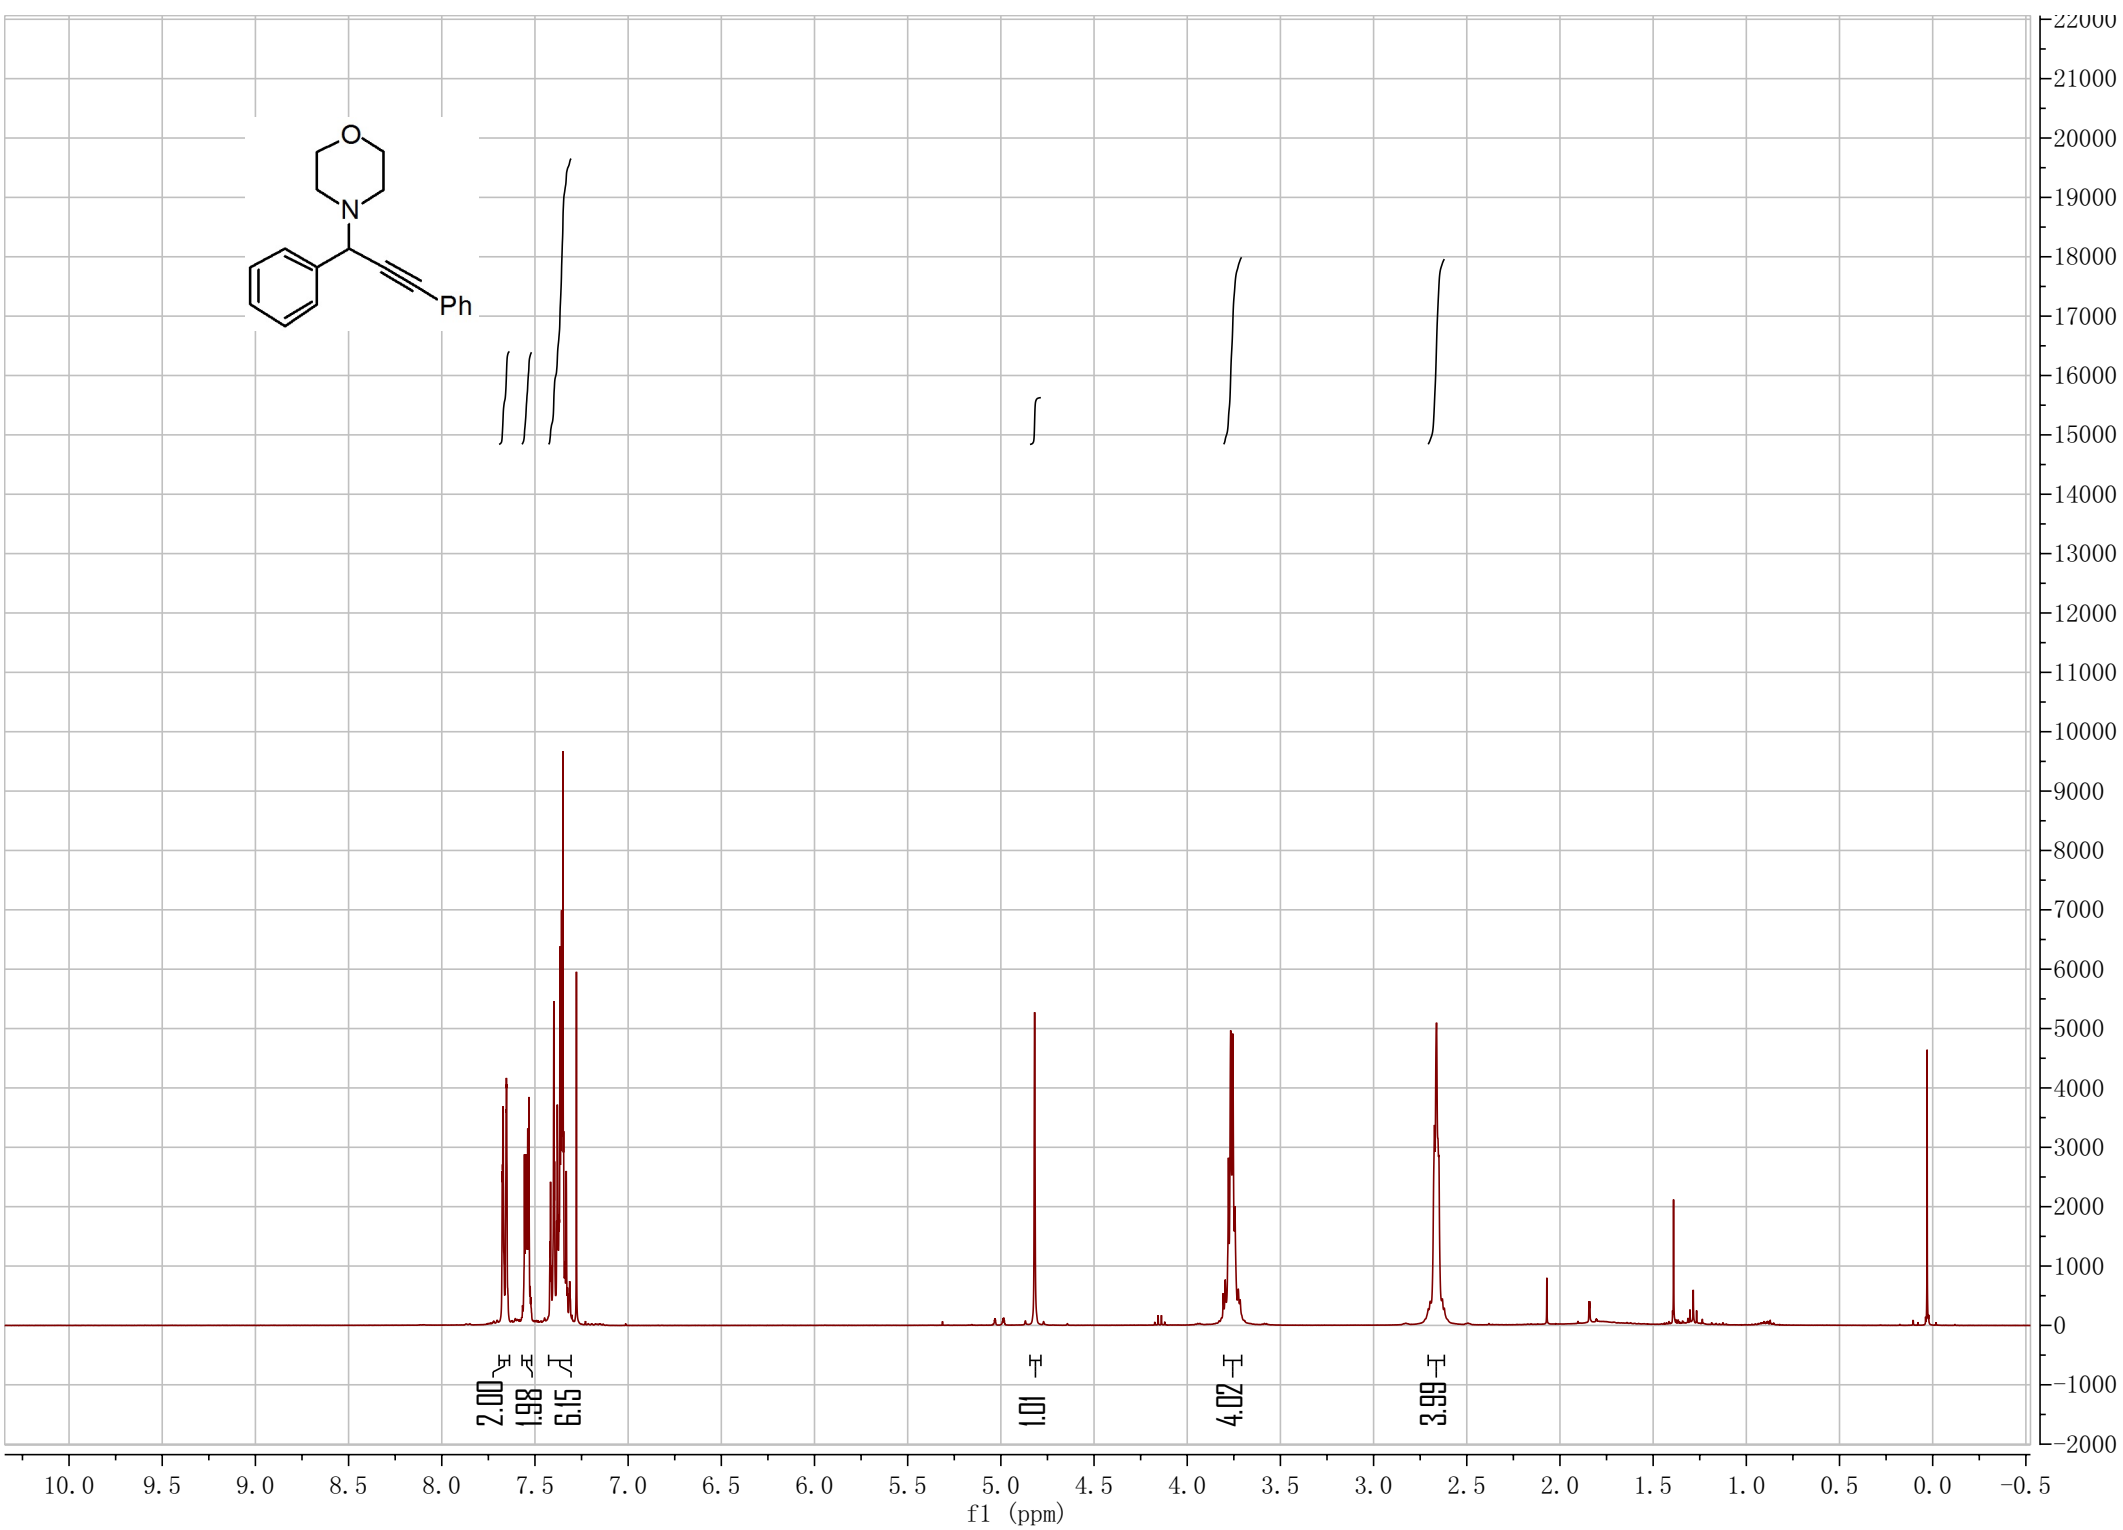

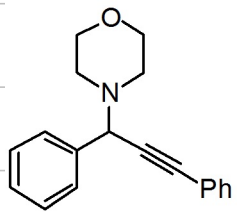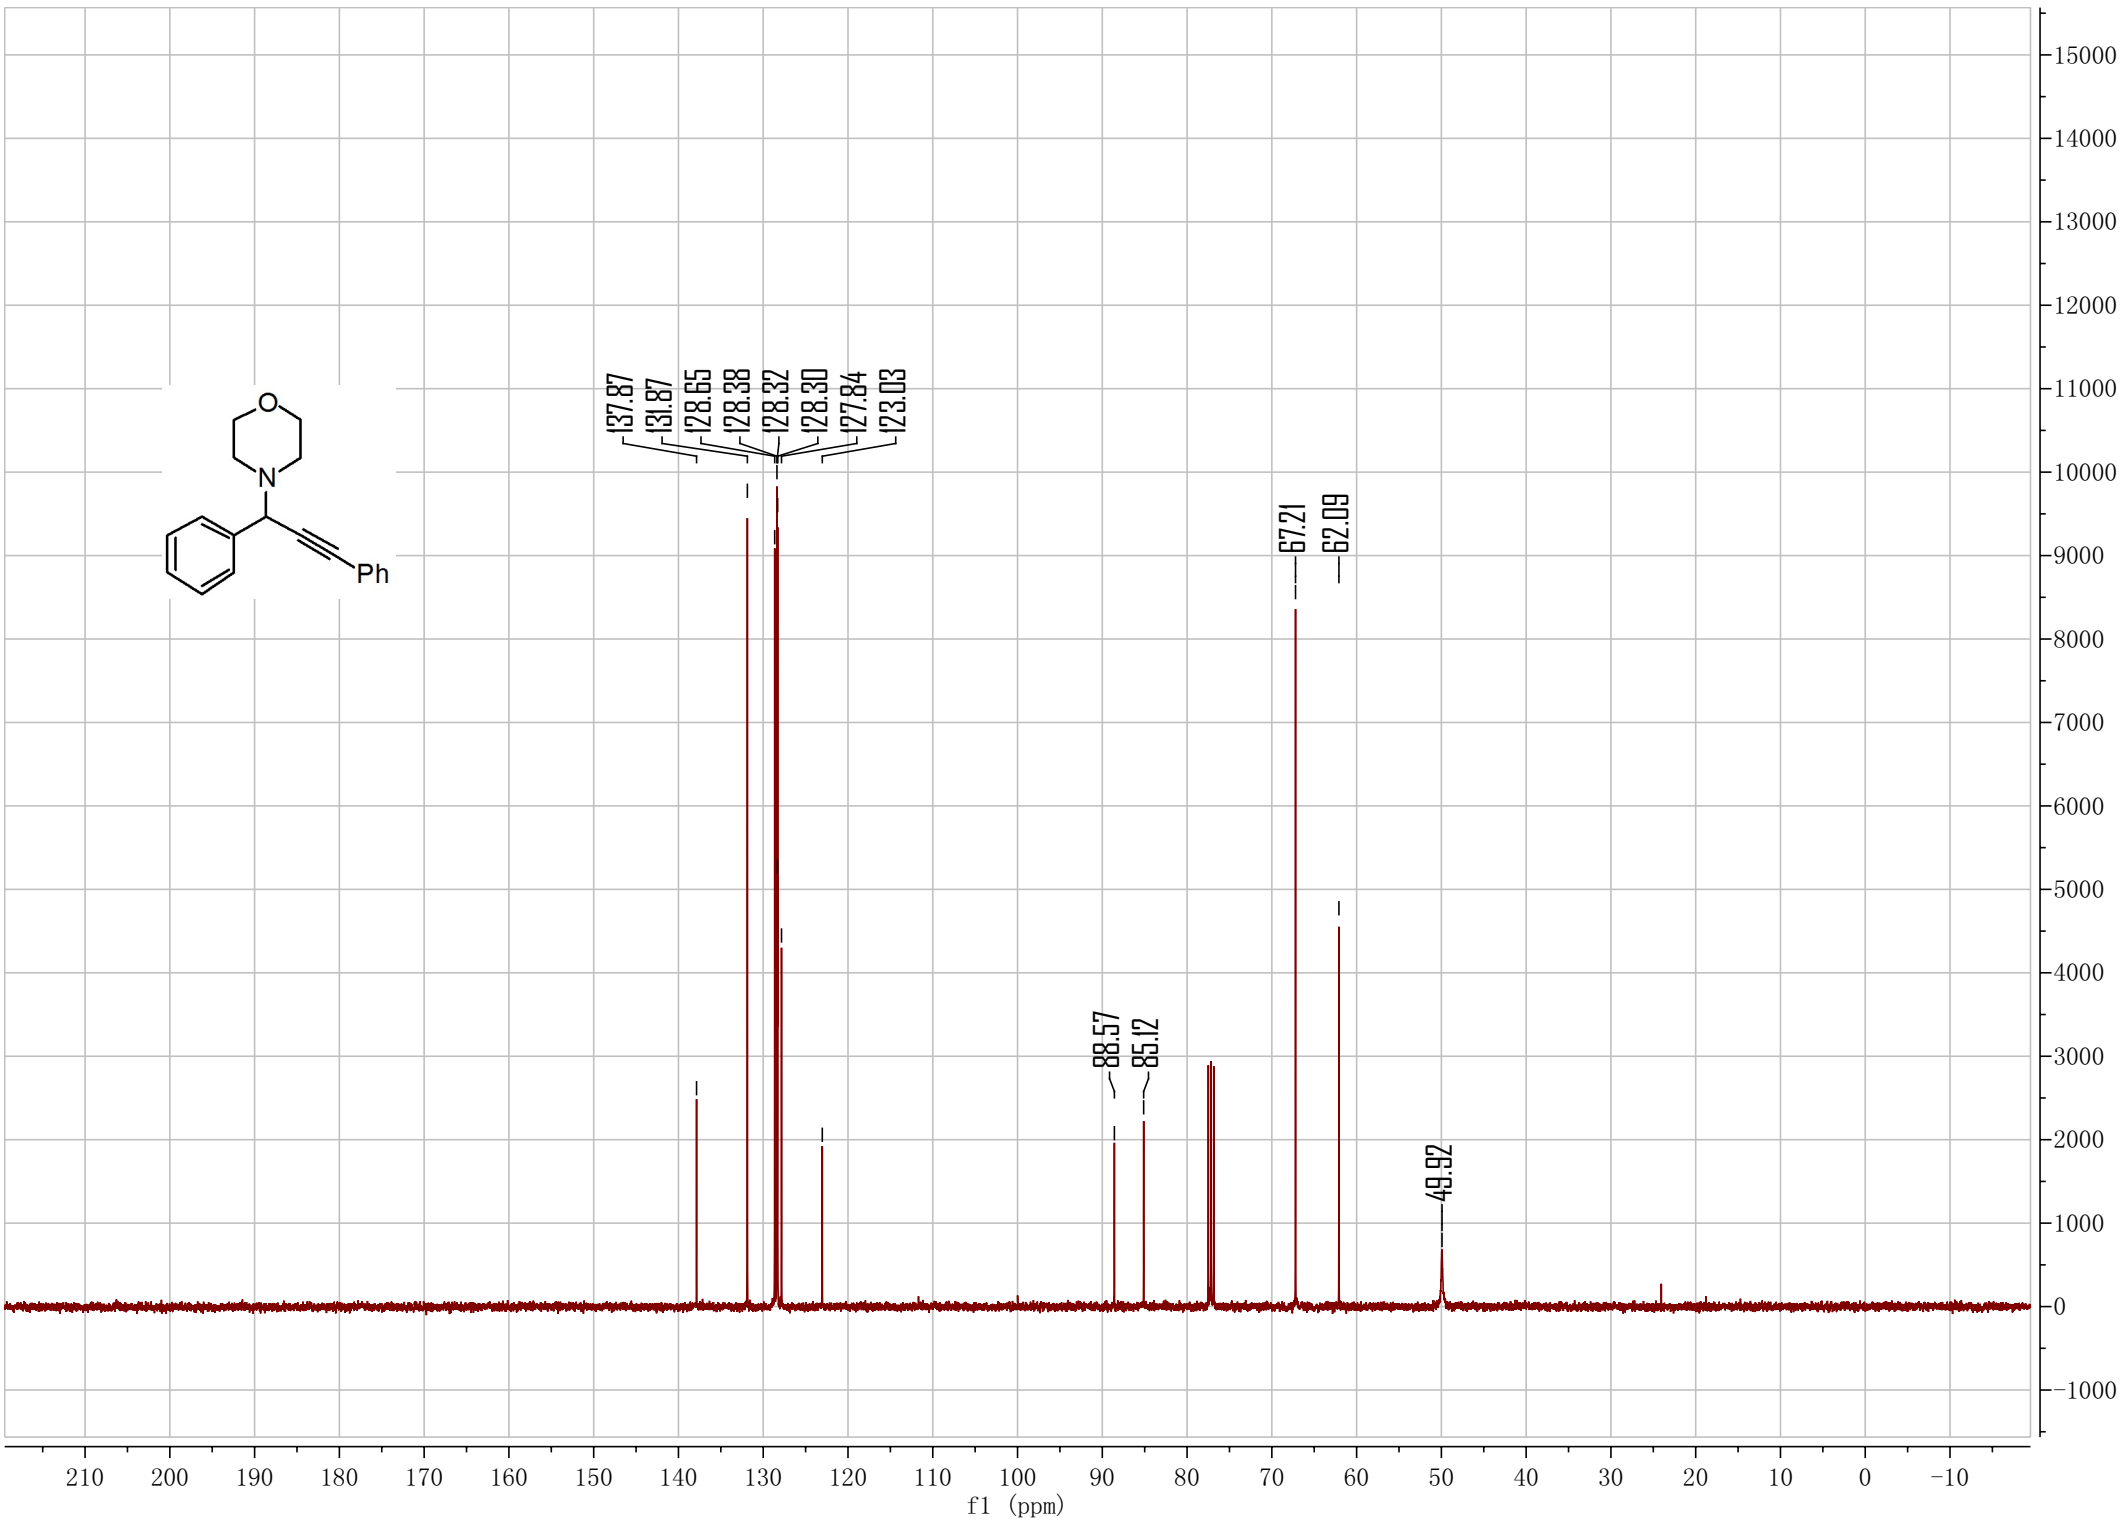

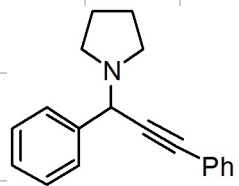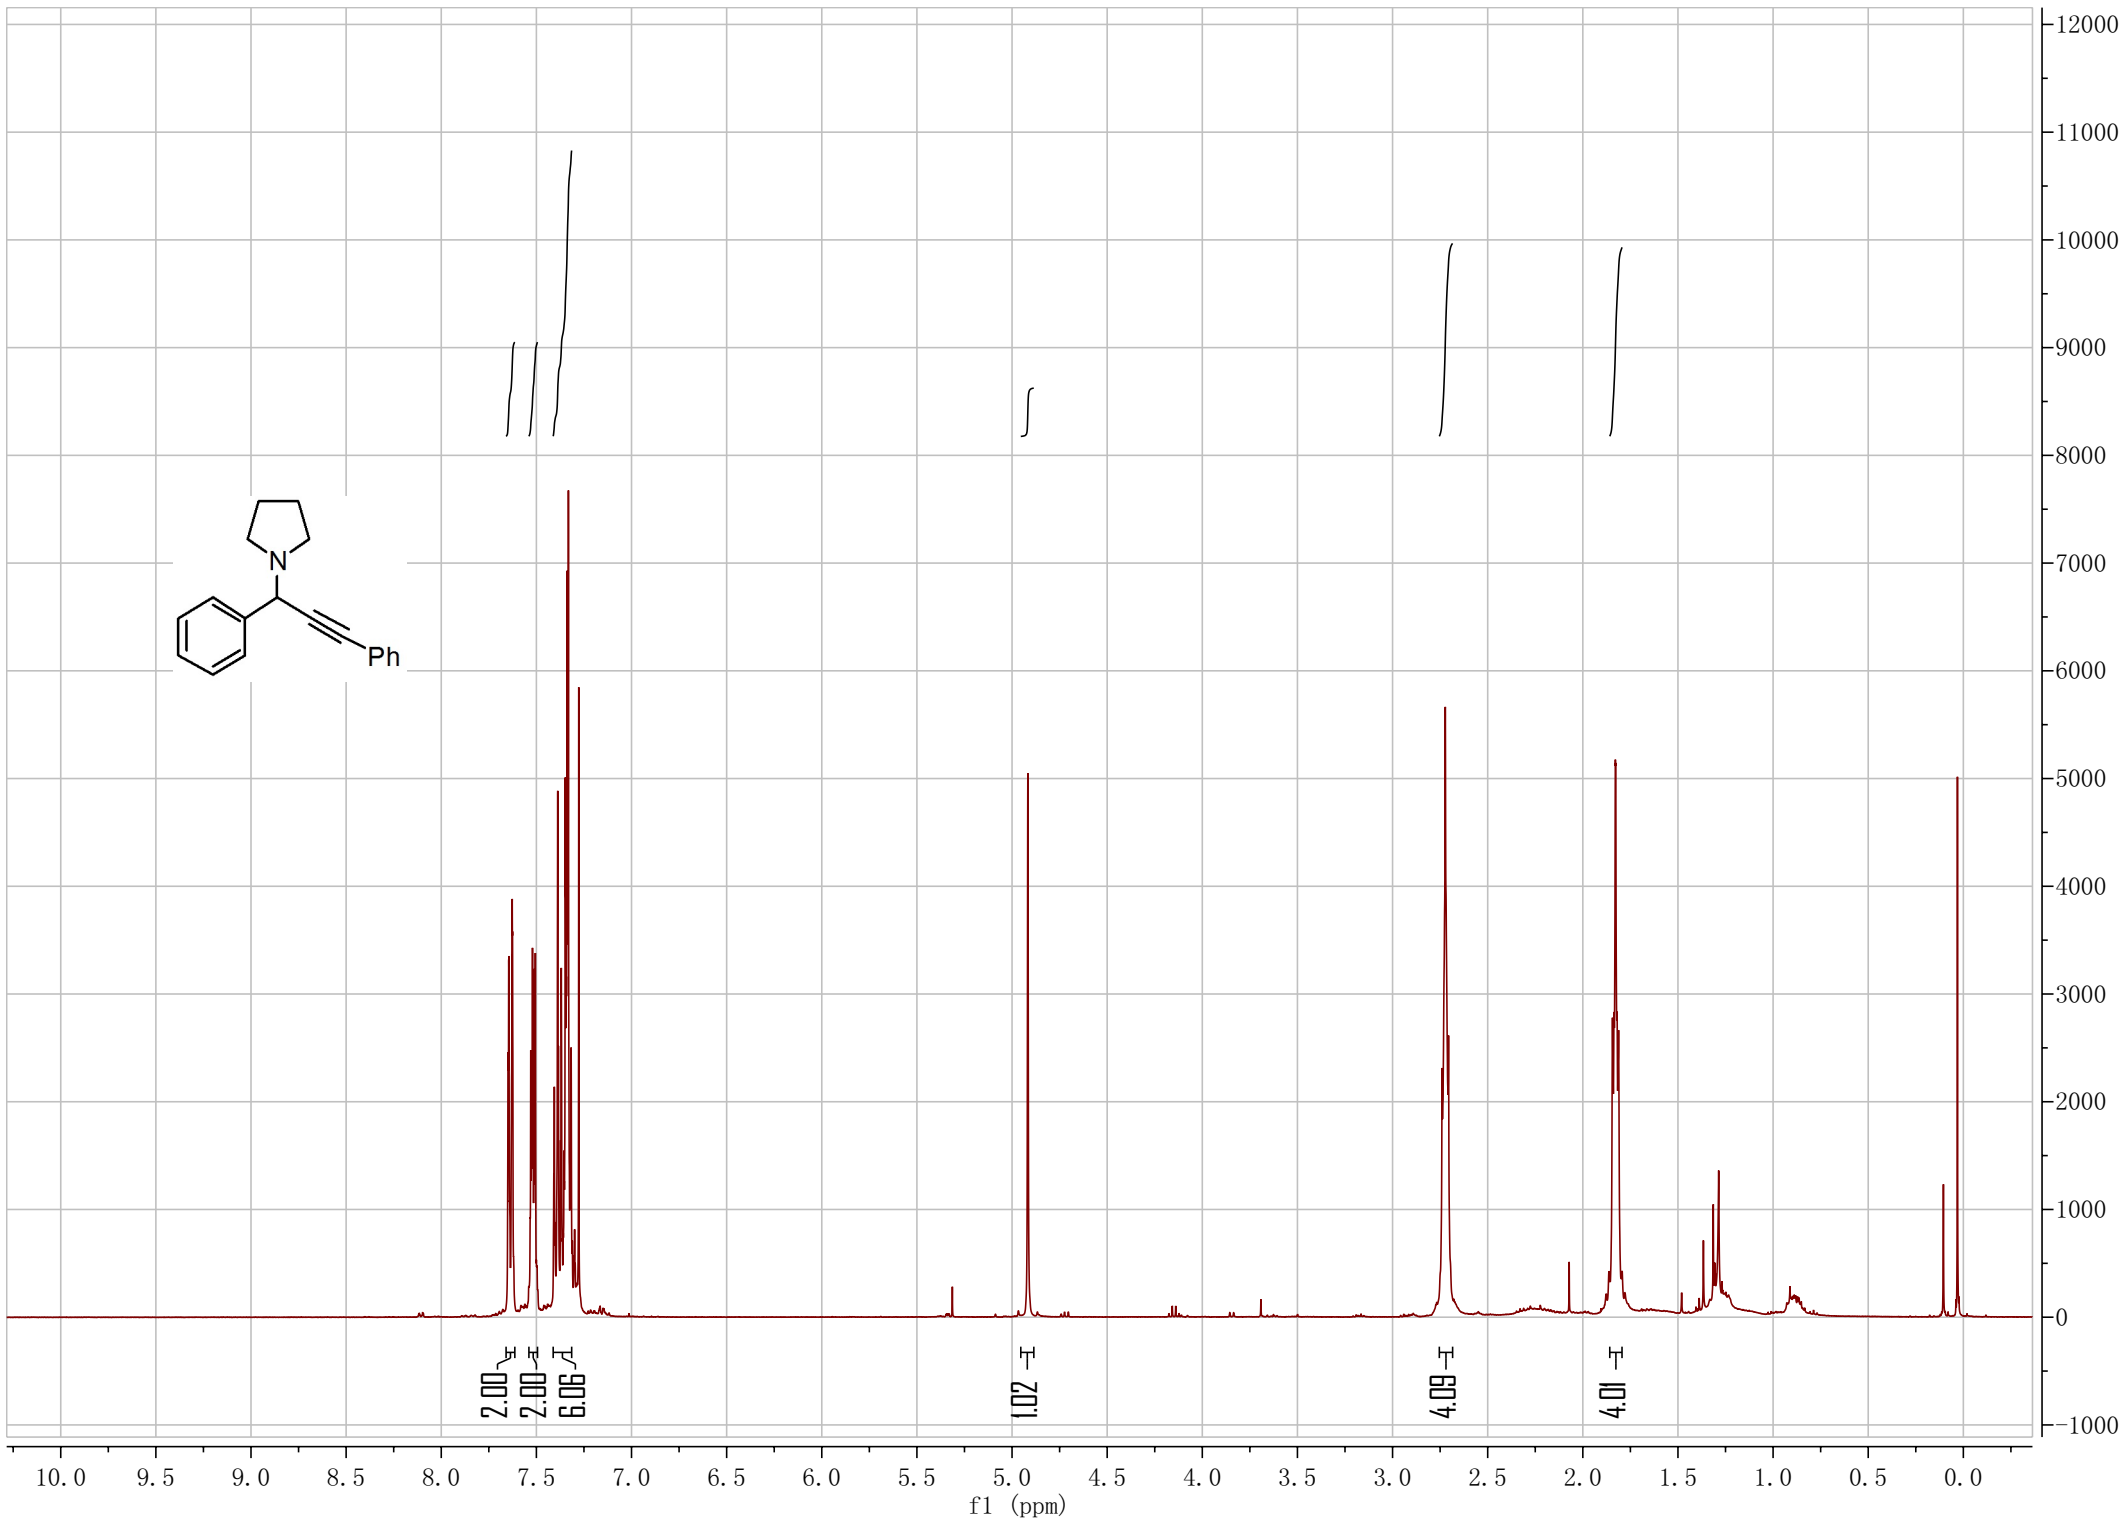

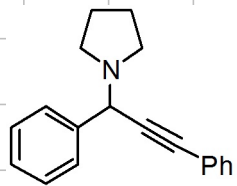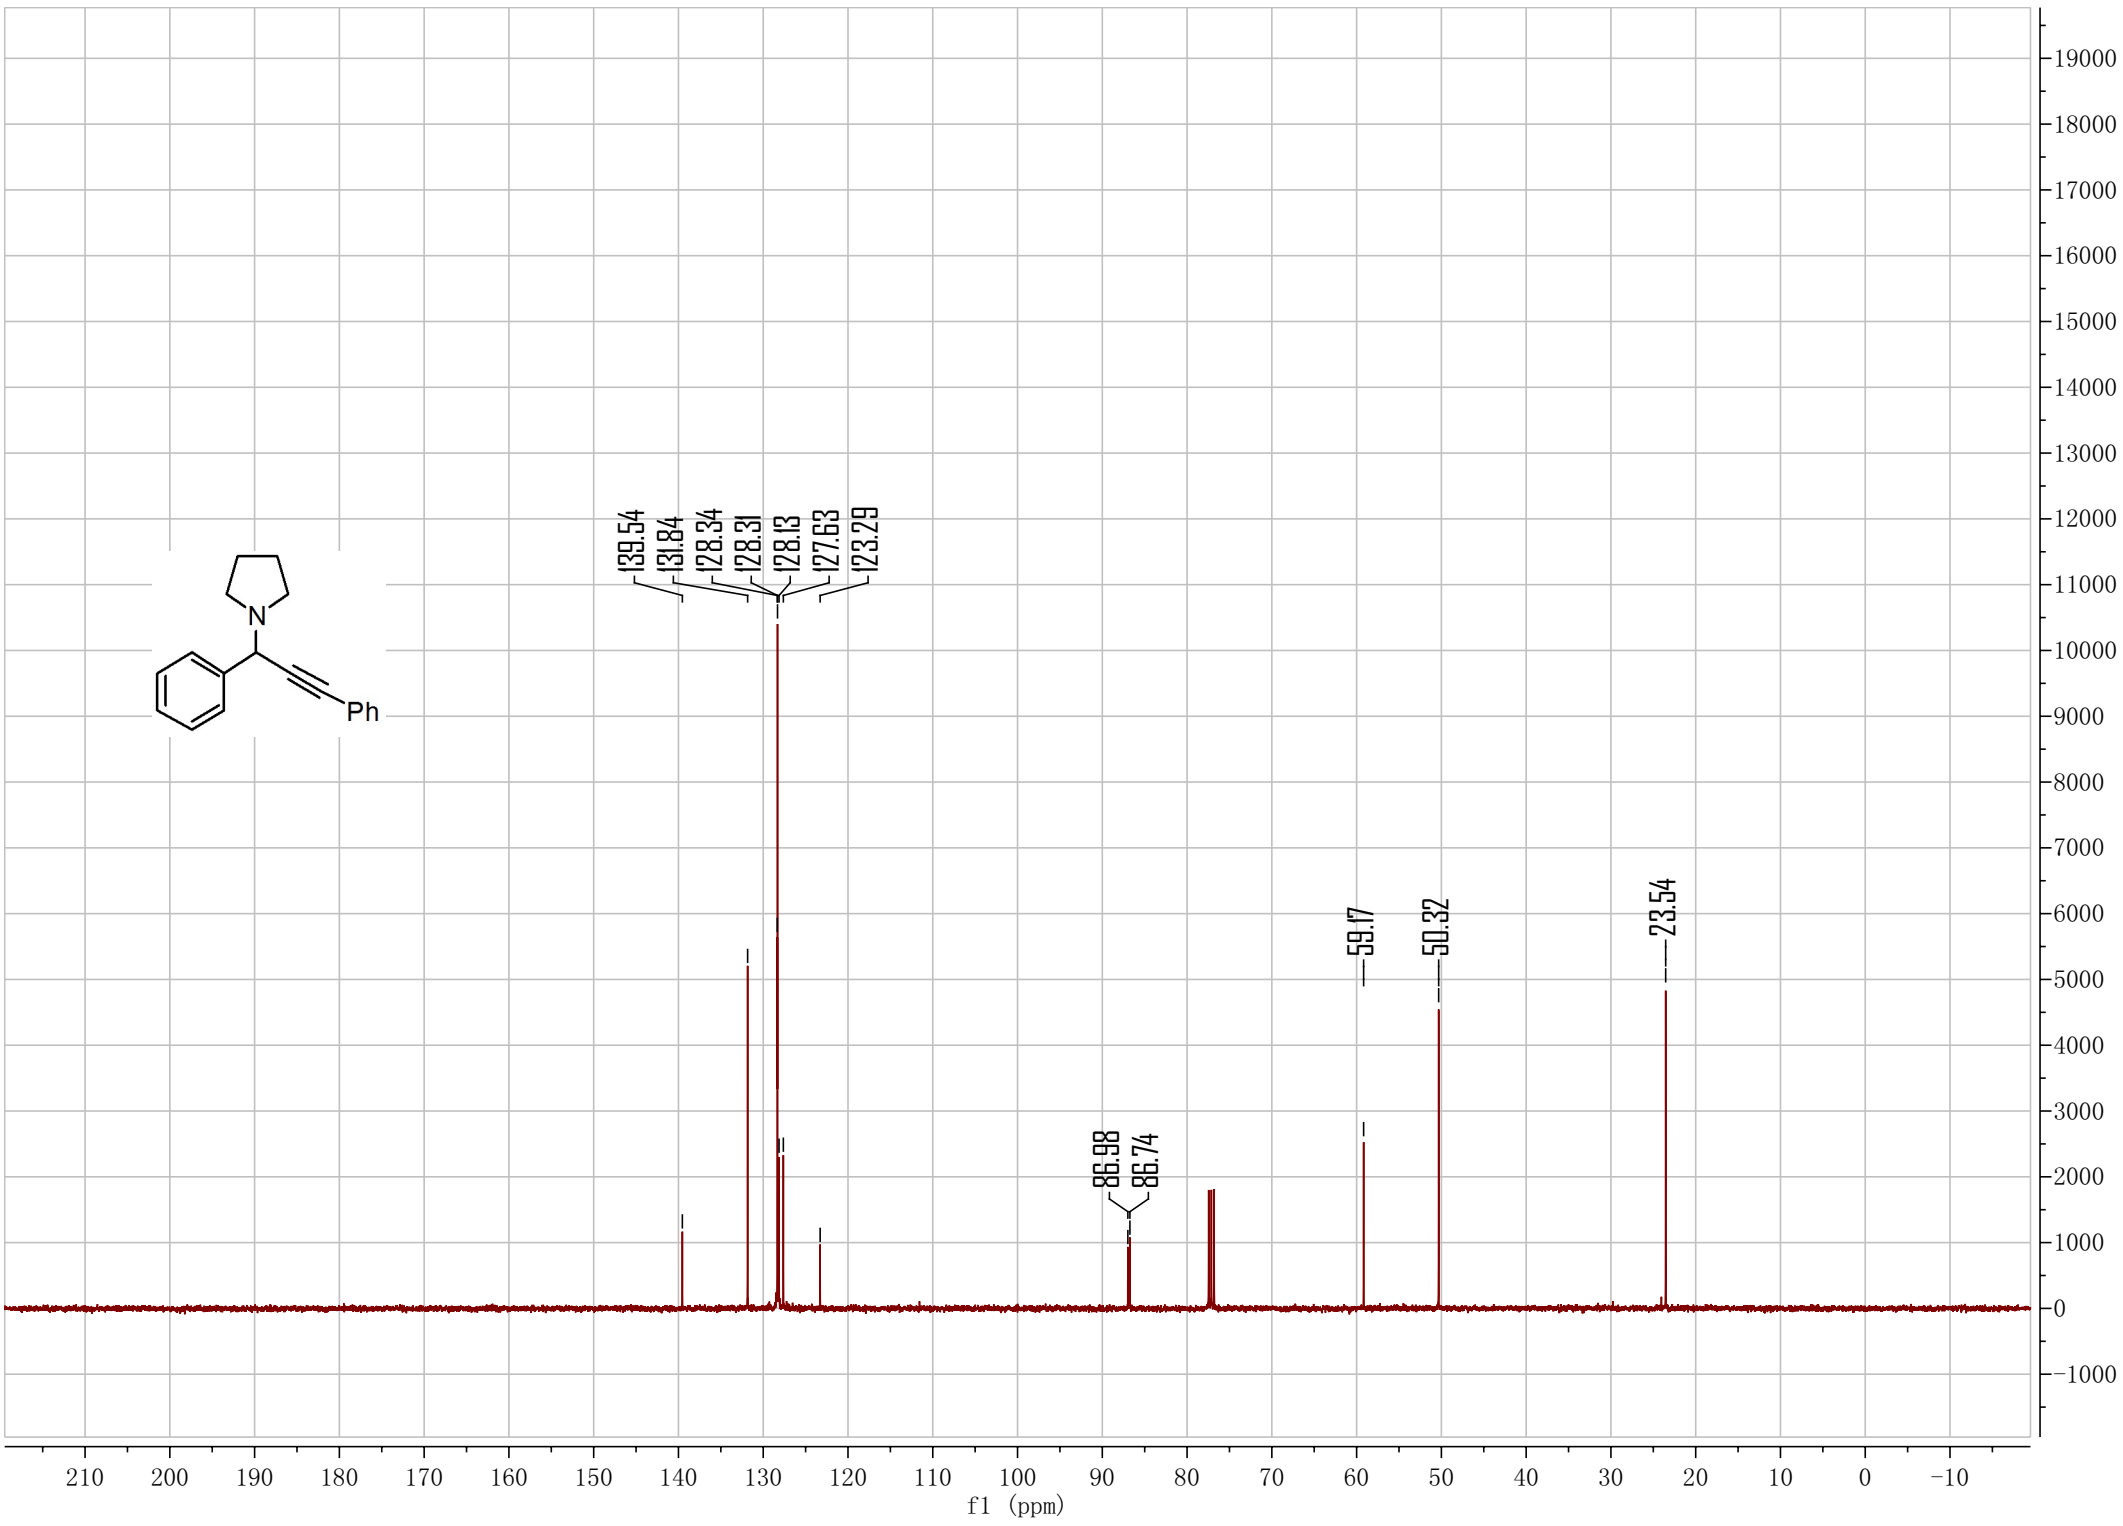

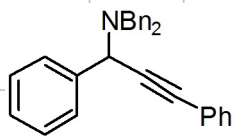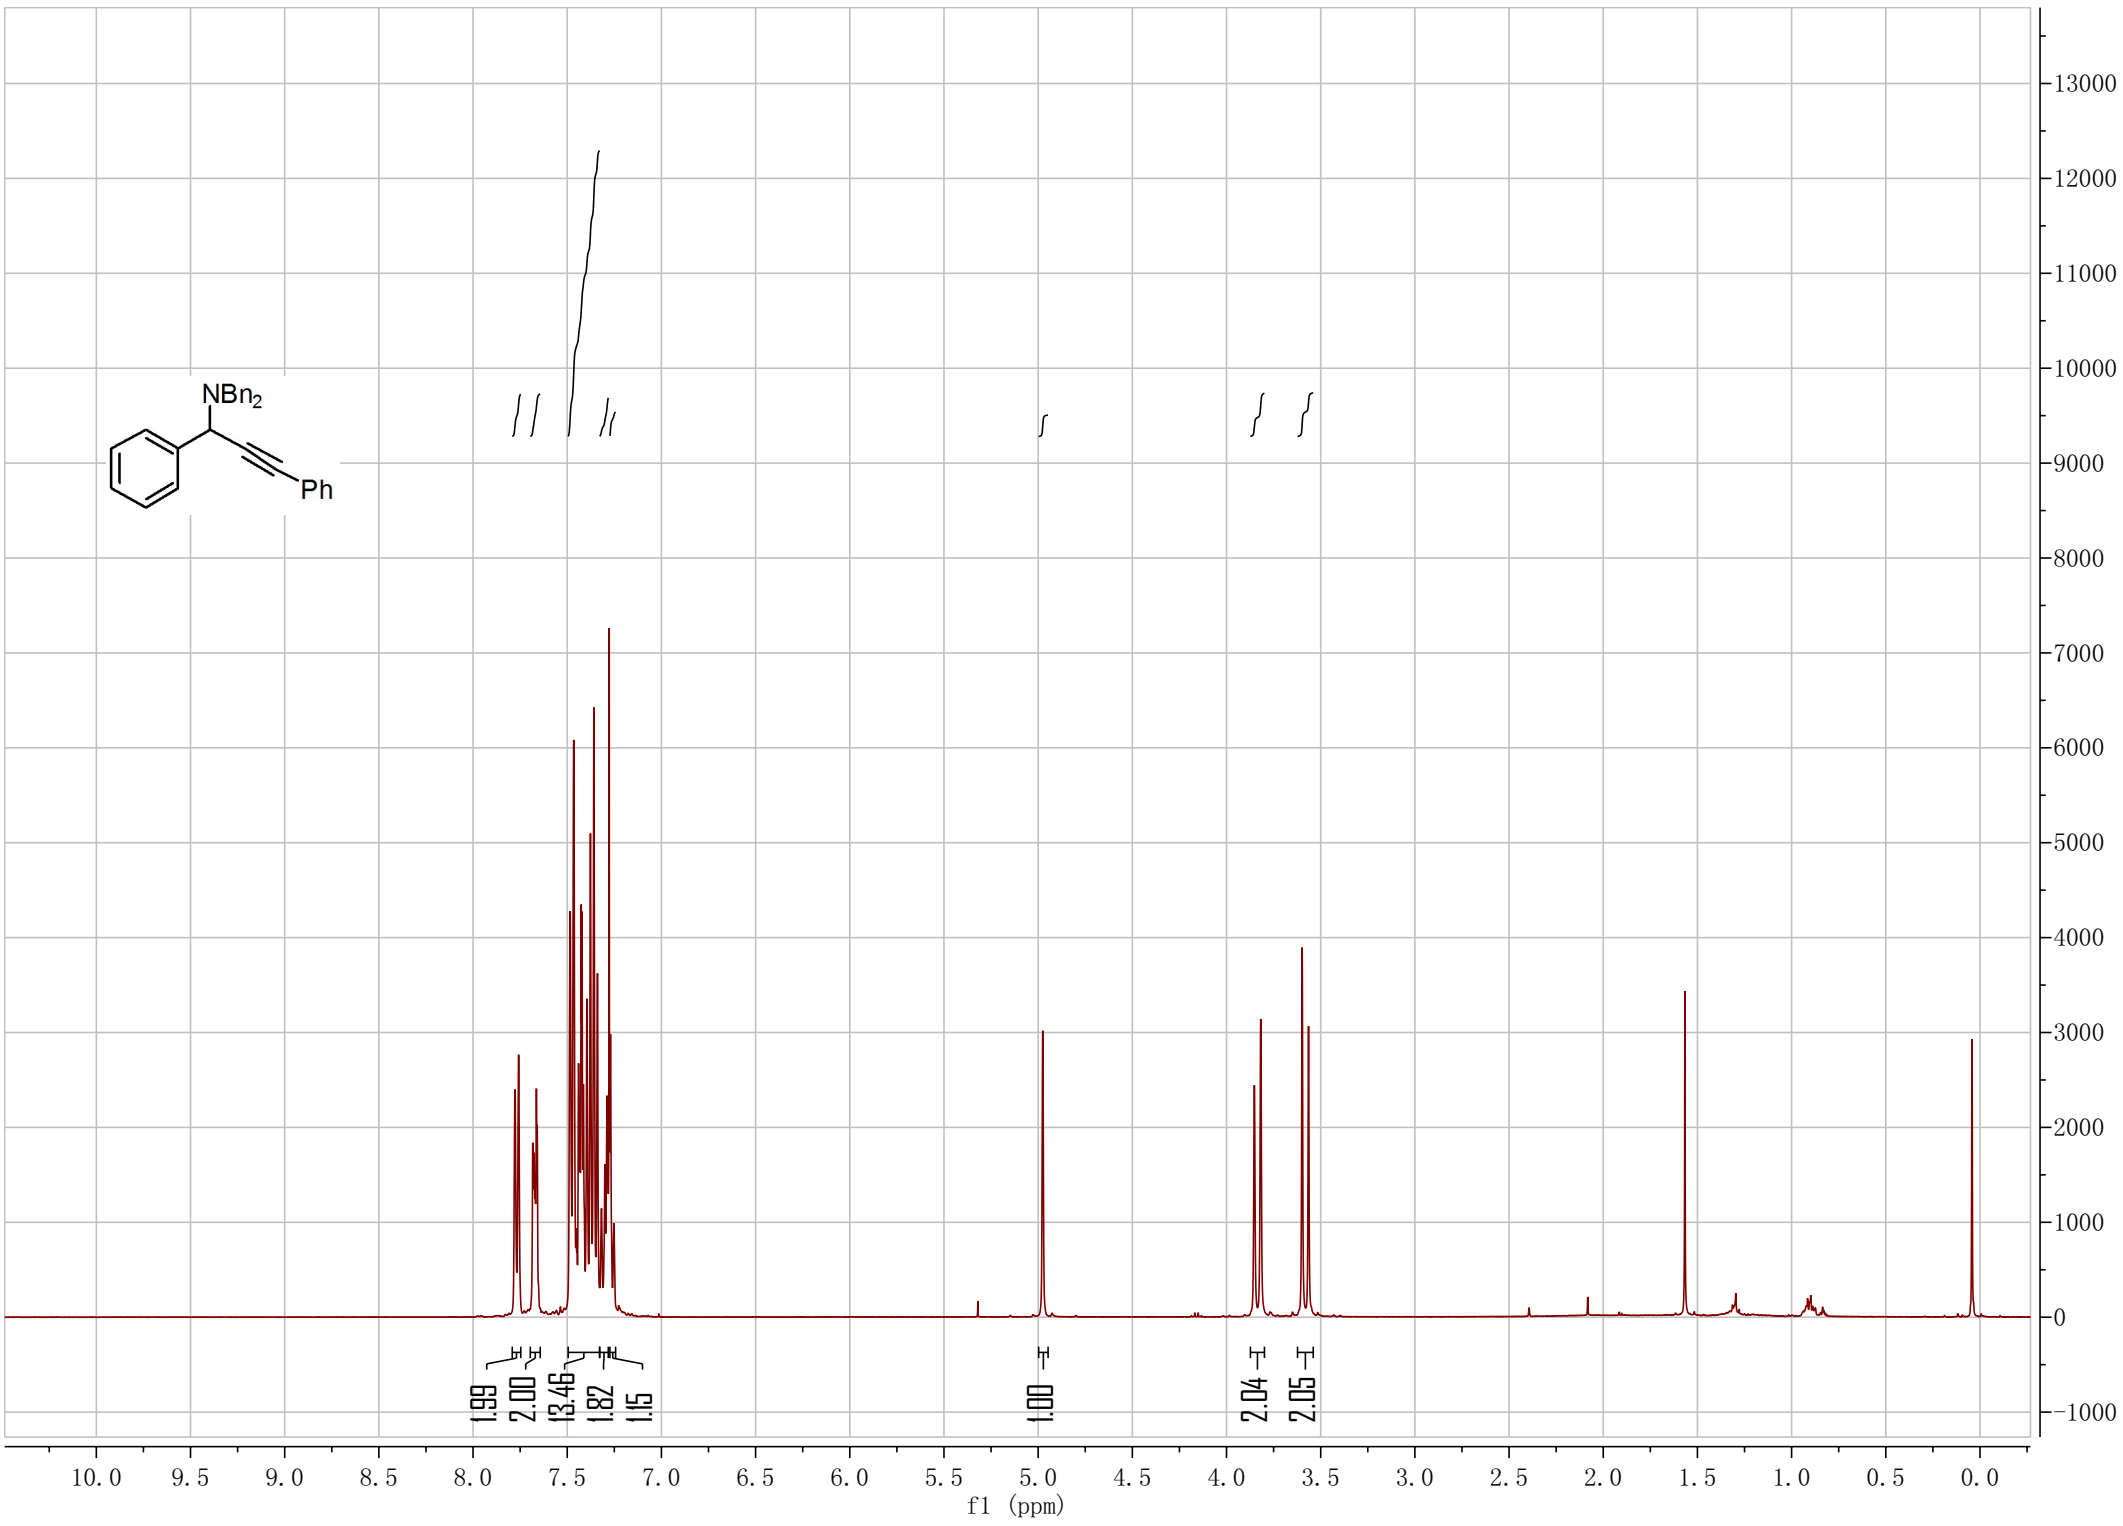

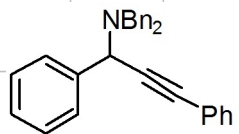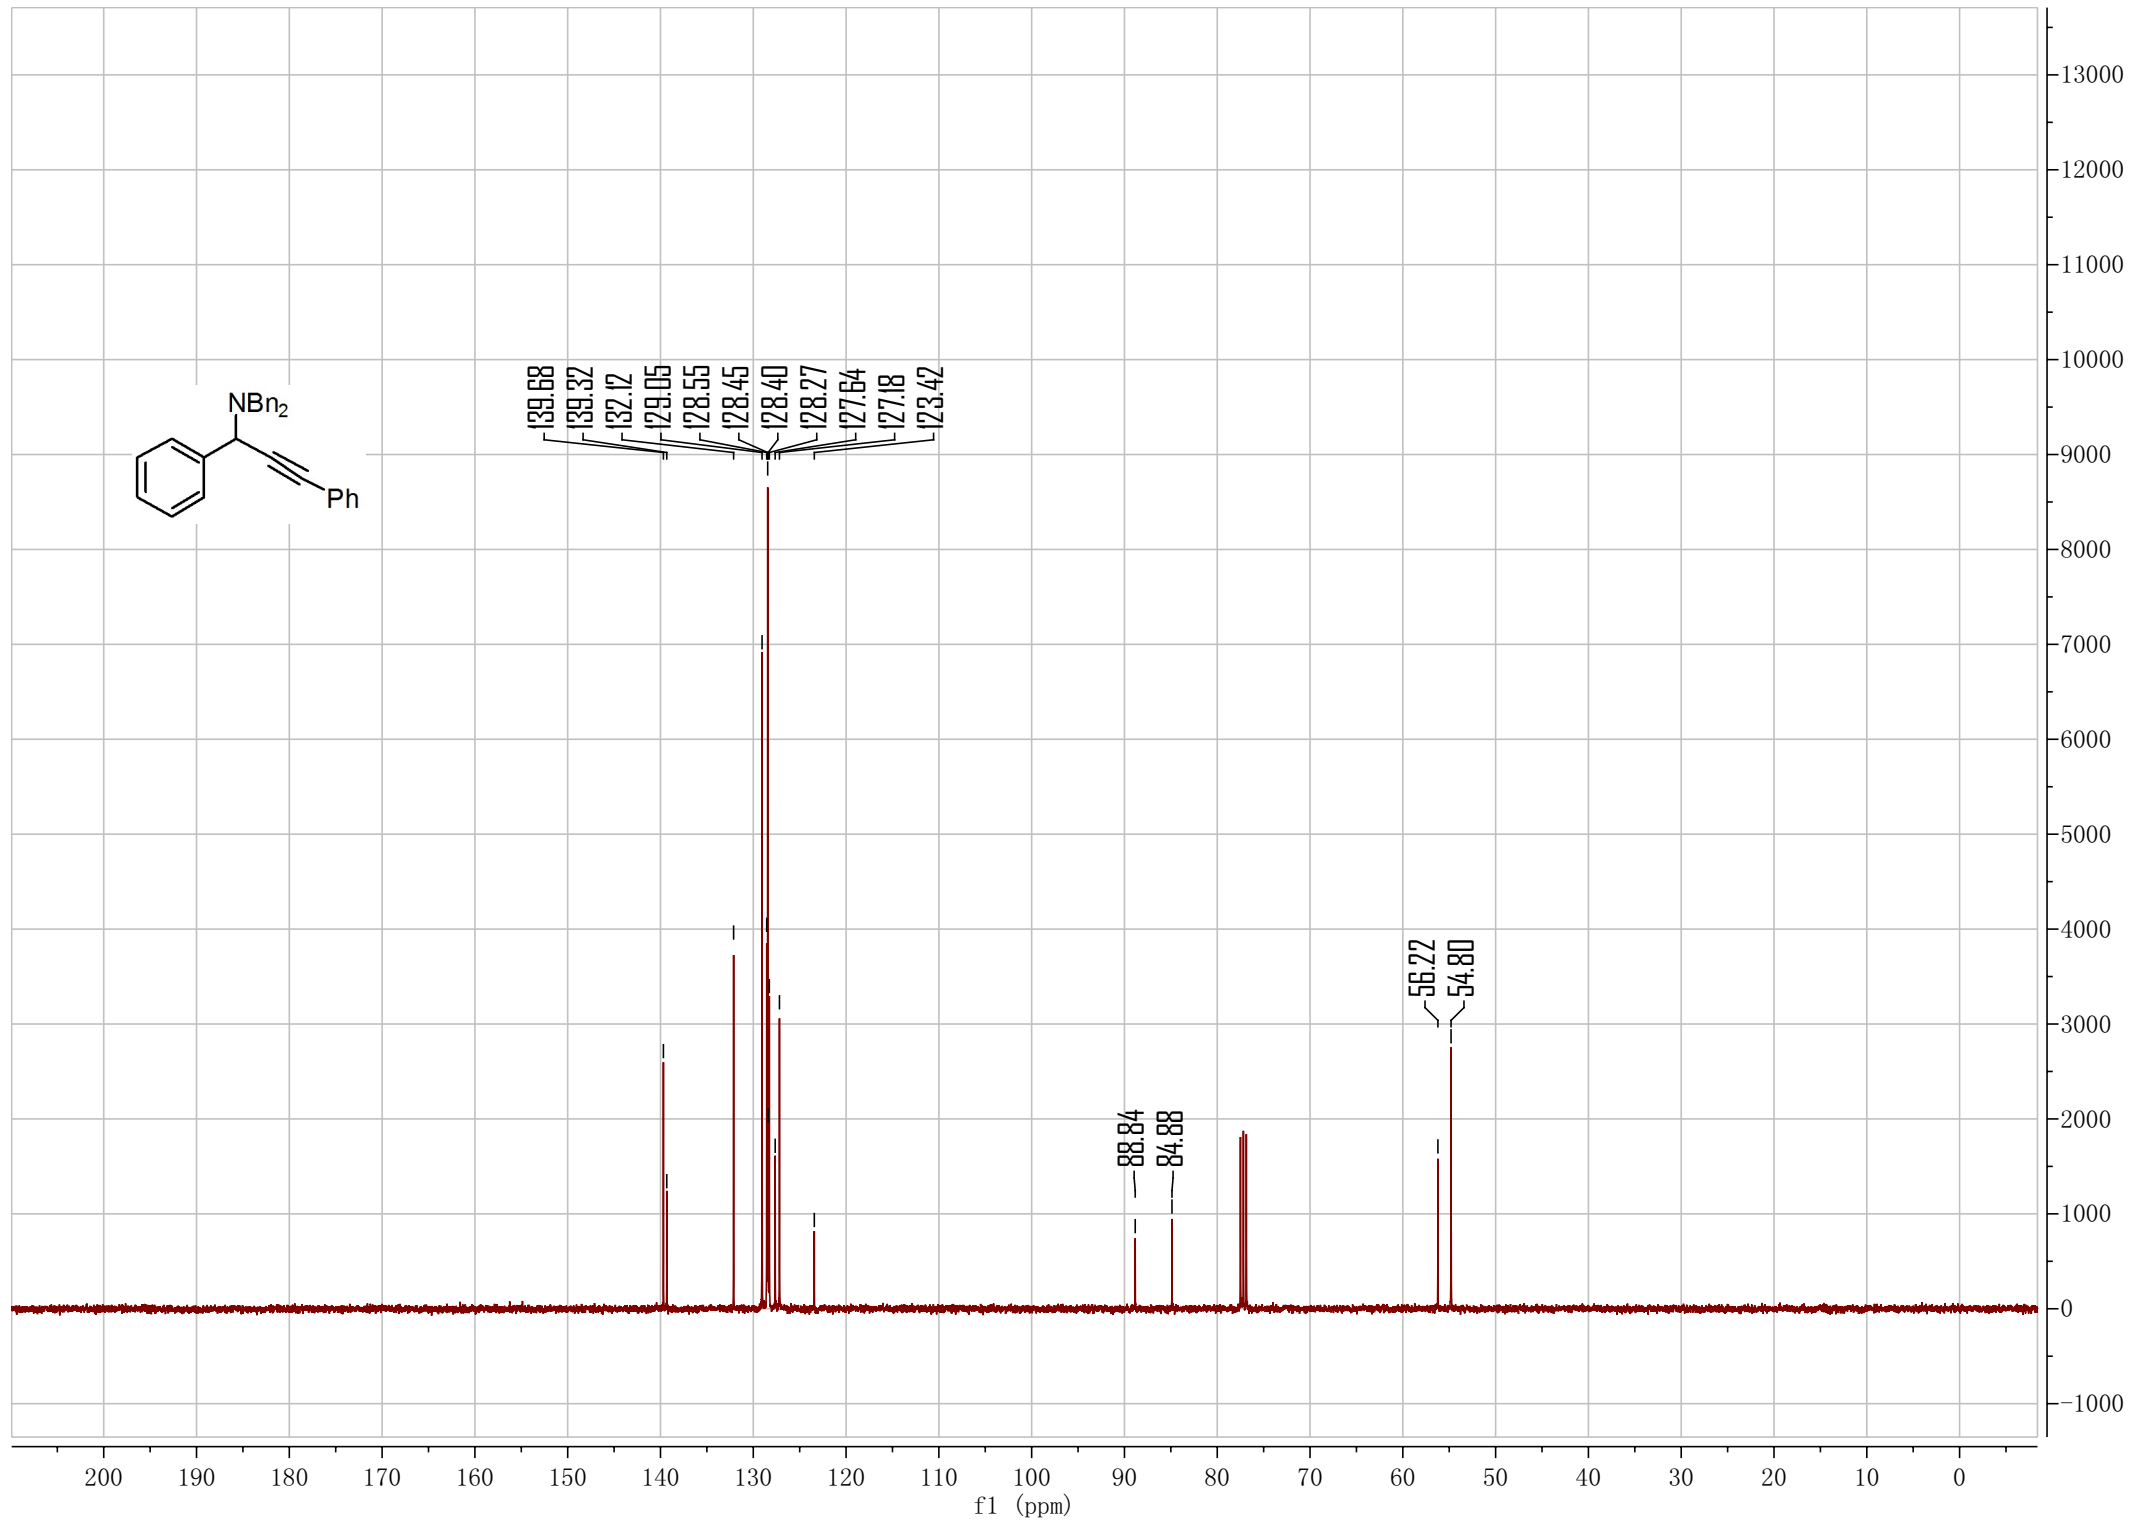

Supplement: c5ra04729c1.pdf [file c5ra04729c1.pdf]
